# Supplementary material for: Cobalt-catalyzed direct α-hydroxymethylation of amides with methanol as a C1 source
Source: Royal Society of Chemistry journal article supplement (doi:10.1039/d1cc06501g), 2021-12-23

## Supporting Information

### Cobalt-Catalyzed Direct $\alpha$ -hydroxymethylation of Amide with Methanol as a C1 Source

Ben Ma,\* Rongxia Sun and Jingya Yang\*

<sup>a</sup> College of Chemistry and Chemical Engineering, Northwest Normal University, Lanzhou 730070,  
People's Republic of China

E-mail: [maben@nwnu.edu.cn](mailto:maben@nwnu.edu.cn); [yangjy@nwnu.edu.cn](mailto:yangjy@nwnu.edu.cn)

#### List of Contents

|                                                           |     |
|-----------------------------------------------------------|-----|
| 1. General information                                    | S2  |
| 2. Experimental procedures                                | S2  |
| 3. Table S1. Optimization of reaction conditions          | S4  |
| 4. Characterization data for all compounds                | S5  |
| 5. Unsuccessful substrates                                | S18 |
| 6. Mechanistic studies                                    | S19 |
| 7. Late-stage modification                                | S25 |
| 8. Crystallographic structure determination ( <b>4a</b> ) | S27 |
| 9. Reference                                              | S31 |
| 10. Cope of NMR spectra                                   | S31 |

## 1. General information

$^1\text{H}$  NMR and  $^{13}\text{C}$  NMR spectra were recorded on a Varian Mercury-400 Plus or Agilent Technologies DD2 (600 MHz) spectrometer in  $\text{CDCl}_3$  or  $\text{CD}_3\text{OD}$ . Chemical shifts ( $\delta$ ) for NMR were quoted in ppm relative to the solvent peak (7.26 ppm for  $^1\text{H}$  and 77.00 ppm for  $^{13}\text{C}$  in  $\text{CDCl}_3$ , 3.31 ppm for  $^1\text{H}$  and 49.00 ppm for  $^{13}\text{C}$  in  $\text{CD}_3\text{OD}$ ). High-resolution mass spectra (HRMS) (ESI) were obtained with Bruker Daltonics APEXII 47 e FT-ICR, Agilent QTOF 700 or Agilent 1200 spectrometer. Melting points were measured on an XT4A apparatus (uncorrected). The reactions were monitored by TLC on silica gel plates (GF254). Reagents and solvents were commercially available, and were used without further purification. The reaction mixtures were purified by column chromatography over silica gel (PE-EtOAc).

## 2. Experimental Procedures

### 2.1 General experimental procedure for synthesis of **1**.<sup>1</sup>

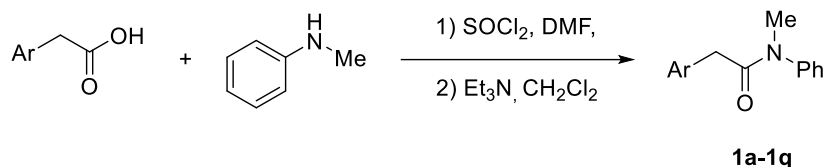

Arylacetic acid (5.0 mmol) was dissolved in dry  $\text{CH}_2\text{Cl}_2$  (4.0 mL) and thionyl chloride (0.5 mL) were added at 0 °C. Add DMF (36.5 mg, 0.5 mmol, 10 mol%) dropwise to the reaction mixture. Stir the reaction mixture for 10 minutes. The resulting solution was decompressed to remove the solvent, and the residue was dissolved in dry  $\text{CH}_2\text{Cl}_2$  (40 mL). Amine (5.0 mmol) and  $\text{Et}_3\text{N}$  (6.0 mmol) were slowly added to the mixture. The reaction was stirred overnight at room temperature. TLC was used to detect the reaction. After the reaction was completed, the reaction mixture was washed with ethyl acetate (20 mL) and saturated  $\text{NaHCO}_3$  (3×30 mL), and the organic phase was dried with  $\text{Na}_2\text{SO}_4$ . The solvent was evaporated under reduced pressure and the coarse residue was purified by silica gel chromatography (PE : EtOAc = 10:1) to get the pure compounds **1a-1q**.

## 2.2 General experimental procedure for synthesis of **3**.<sup>2</sup>

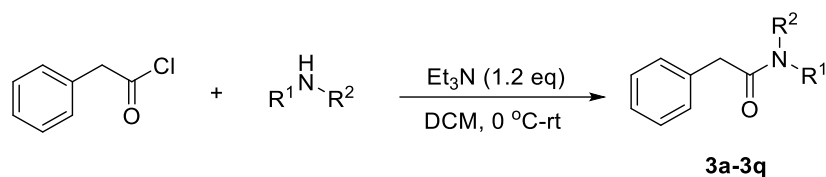

Amine (10.0 mmol) and Et<sub>3</sub>N (6.0 mmol) were dissolved in CH<sub>2</sub>Cl<sub>2</sub> (30 mL) and aryl chloride (5.0 mmol) was slowly added at 0 °C. The mixture reacts overnight at room temperature. TLC was used to determine the reaction. After the reaction was completed, the reaction mixture was respectively extracted three times by HCl (1M) and DCM. Dry the organic phase with sodium sulfate, and concentration of organic phases under reduced pressure. The crude product was purified by column chromatography (PE : EtOAc = 10:1) to get the pure compounds **3a-3q**.

## 2.3 General procedure for $\alpha$ -hydroxymethylation of amide

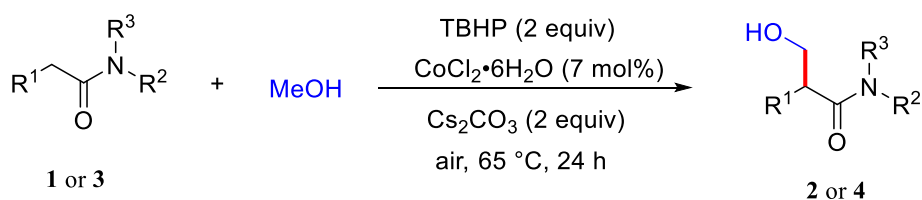

CoCl<sub>2</sub>·6H<sub>2</sub>O (5.0 mg, 0.021 mmol, 7 mol%), Cs<sub>2</sub>CO<sub>3</sub> (231.5 mg, 0.6 mmol), amide (**1** or **3**, 0.3 mmol) and MeOH:*n*-Hexane 10 : 1 (3 mL) were sequentially added into a 25 mL Schleck tube. Then TBHP (70 wt% in H<sub>2</sub>O) (83  $\mu$ L, 0.6 mmol) was added to the stirred reaction system. The reaction mixture was stirred at 65 °C until the reaction was complete (monitored by TLC). The reaction solution was cooled at room temperature and quenched with NH<sub>4</sub>Cl (2 mL), extracted with ethyl acetate (3×5 mL). The combined organic phase was dried over anhydrous MgSO<sub>4</sub>, filtrated and concentrated under reduced pressure. The crude product was purified by column chromatography on silica gel (PE : EtOAc = 5:1-3:1) to afford the pure products (**2** or **4**).

## 2.4 Procedure for gram-scale hydroxymethylation of amide 1a

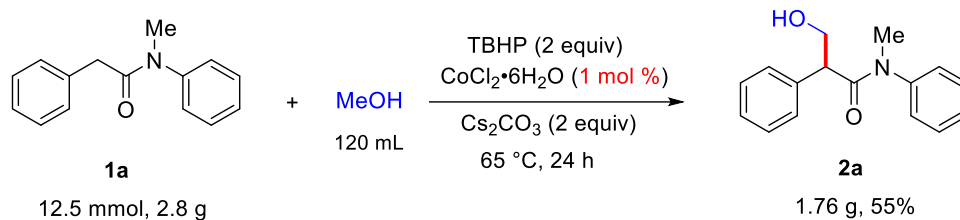

CoCl<sub>2</sub>·6H<sub>2</sub>O (32.1 mg, 0.125 mmol, 1.0 mol%), Cs<sub>2</sub>CO<sub>3</sub> (8.1 g, 25.0 mmol, 2 equiv), MeOH:*n*-Hexane 10 : 1 (120 mL) and amide (12.5 mmol) were sequentially added into a 200 mL round-bottom flask. Then TBHP (70 wt% in H<sub>2</sub>O) (2.1 mL, 25.0 mmol) was added to the stirred reaction system. The reaction mixture was stirred at 65 °C for 1 h. The reaction solution was cooled at room temperature and quenched with NH<sub>4</sub>Cl (20 mL), extracted with EtOAc (3×30 mL). The combined organic phase was dried over anhydrous MgSO<sub>4</sub>, filtrated and concentrated under reduced pressure. The crude product was purified by column chromatography on silica gel (PE : EtOAc = 5:1) to afford the pure product **2a** (1.76 g, 55%).

## 3. Table S1. Optimization of reaction conditions.

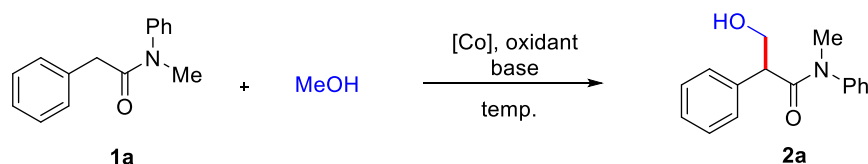

| Entry | [Co] (mol%)                                              | Oxidation (eq)                    | Base (eq)                           | Temp. (°C) | Yield 2a (%) |
|-------|----------------------------------------------------------|-----------------------------------|-------------------------------------|------------|--------------|
| 1     | CoCl <sub>2</sub> ·6H <sub>2</sub> O (7)                 | TBHP (2)                          | Cs <sub>2</sub> CO <sub>3</sub> (2) | 65         | 77           |
| 2     | CoCl <sub>2</sub> ·6H <sub>2</sub> O (7)                 | H <sub>2</sub> O <sub>2</sub> (2) | Cs <sub>2</sub> CO <sub>3</sub> (2) | 65         | <1           |
| 3     | CoCl <sub>2</sub> ·6H <sub>2</sub> O (7)                 | O <sub>2</sub>                    | Cs <sub>2</sub> CO <sub>3</sub> (2) | 65         | NR           |
| 4     | Co(PO <sub>4</sub> ) <sub>2</sub> (7)                    | TBHP (2)                          | Cs <sub>2</sub> CO <sub>3</sub> (2) | 65         | 73           |
| 5     | Co(OAc) <sub>2</sub> (7)                                 | TBHP (2)                          | Cs <sub>2</sub> CO <sub>3</sub> (2) | 65         | 75           |
| 6     | CoCO <sub>3</sub> (7)                                    | TBHP (2)                          | Cs <sub>2</sub> CO <sub>3</sub> (2) | 65         | 74           |
| 7     | Co(NO <sub>3</sub> ) <sub>2</sub> ·6H <sub>2</sub> O (7) | TBHP (2)                          | Cs <sub>2</sub> CO <sub>3</sub> (2) | 65         | 47           |
| 8     | CoCl <sub>2</sub> ·6H <sub>2</sub> O (7)                 | TBHP (2)                          | K <sub>2</sub> CO <sub>3</sub> (2)  | 65         | 22           |
| 9     | CoCl <sub>2</sub> ·6H <sub>2</sub> O (7)                 | TBHP (2)                          | K <sub>3</sub> PO <sub>4</sub> (2)  | 65         | 26           |
| 10    | CoCl <sub>2</sub> ·6H <sub>2</sub> O (7)                 | TBHP (2)                          | Na <sub>2</sub> CO <sub>3</sub> (2) | 65         | <1           |

|                 |                                           |            |                                       |     |        |
|-----------------|-------------------------------------------|------------|---------------------------------------|-----|--------|
| 11              | CoCl <sub>2</sub> ·6H <sub>2</sub> O (7)  | TBHP (2)   | DABCO (2)                             | 65  | NR     |
| 12              | CoCl <sub>2</sub> ·6H <sub>2</sub> O (7)  | TBHP (2)   | NEt <sub>3</sub> (2)                  | 65  | NR     |
| 13              | CoCl <sub>2</sub> ·6H <sub>2</sub> O (7)  | TBHP (2)   | DBU (2)                               | 65  | NR     |
| 14              | CoCl <sub>2</sub> ·6H <sub>2</sub> O (7)  | TBHP (2)   | CsF (2)                               | 65  | 67     |
| 15              | CoCl <sub>2</sub> ·6H <sub>2</sub> O (7)  | TBHP (2)   | CsOH (2)                              | 65  | 32     |
| 16              | CoCl <sub>2</sub> ·6H <sub>2</sub> O (3)  | TBHP (2)   | Cs <sub>2</sub> CO <sub>3</sub> (2)   | 65  | 54     |
| 17              | CoCl <sub>2</sub> ·6H <sub>2</sub> O (5)  | TBHP (2)   | Cs <sub>2</sub> CO <sub>3</sub> (2)   | 65  | 66     |
| 18              | CoCl <sub>2</sub> ·6H <sub>2</sub> O (10) | TBHP (2)   | Cs <sub>2</sub> CO <sub>3</sub> (2)   | 65  | 40     |
| 19              | CoCl <sub>2</sub> ·6H <sub>2</sub> O (7)  | TBHP (1.0) | Cs <sub>2</sub> CO <sub>3</sub> (2)   | 65  | 30     |
| 20              | CoCl <sub>2</sub> ·6H <sub>2</sub> O (7)  | TBHP (1.5) | Cs <sub>2</sub> CO <sub>3</sub> (2)   | 65  | 39     |
| 21              | CoCl <sub>2</sub> ·6H <sub>2</sub> O (7)  | TBHP (2.2) | Cs <sub>2</sub> CO <sub>3</sub> (2)   | 65  | 74     |
| 22              | CoCl <sub>2</sub> ·6H <sub>2</sub> O (7)  | TBHP (2)   | Cs <sub>2</sub> CO <sub>3</sub> (1.6) | 65  | 61     |
| 23              | CoCl <sub>2</sub> ·6H <sub>2</sub> O (7)  | TBHP (2)   | Cs <sub>2</sub> CO <sub>3</sub> (1.8) | 65  | 68     |
| 24              | CoCl <sub>2</sub> ·6H <sub>2</sub> O (7)  | TBHP (2)   | Cs <sub>2</sub> CO <sub>3</sub> (2.2) | 65  | 75     |
| 25              | CoCl <sub>2</sub> ·6H <sub>2</sub> O (7)  | TBHP (2)   | Cs <sub>2</sub> CO <sub>3</sub> (2)   | 50  | 52     |
| 26              | CoCl <sub>2</sub> ·6H <sub>2</sub> O (7)  | TBHP (2)   | Cs <sub>2</sub> CO <sub>3</sub> (2)   | 100 | 23     |
| 27 <sup>c</sup> | CoCl <sub>2</sub> ·6H <sub>2</sub> O (7)  | TBHP (2)   | Cs <sub>2</sub> CO <sub>3</sub> (2)   | 65  | 90(88) |
| 28 <sup>d</sup> | CoCl <sub>2</sub> ·6H <sub>2</sub> O (7)  | TBHP (2)   | Cs <sub>2</sub> CO <sub>3</sub> (2)   | 65  | 70     |
| 29 <sup>e</sup> | CoCl <sub>2</sub> ·6H <sub>2</sub> O (7)  | TBHP (2)   | Cs <sub>2</sub> CO <sub>3</sub> (2)   | 65  | 75     |
| 30              | —                                         | TBHP (2)   | Cs <sub>2</sub> CO <sub>3</sub> (2)   | 65  | NR     |
| 31              | CoCl <sub>2</sub> ·6H <sub>2</sub> O (7)  | —          | Cs <sub>2</sub> CO <sub>3</sub> (2)   | 65  | NR     |

<sup>a</sup> reaction condition: **1a** (0.1 mmol), MeOH (3 mL). <sup>b</sup> NMR yield, the number in parenthesis is isolated yield. <sup>c</sup> MeOH:hexane (10:1); <sup>d</sup> MeOH:Toluene (10:1); <sup>e</sup> MeOH:DCM (10:1) 3 mL as solvent.

#### 4. Characterization data for all compounds

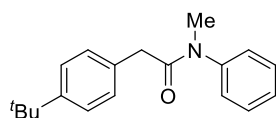

**(4-(tert-butyl)phenyl)-N-methyl-N-phenylacetamide (1h)**: 1.3 g, 92% yield. Yellow oil. <sup>1</sup>H NMR (400 MHz, CDCl<sub>3</sub>) δ 7.41 – 7.32 (m, 3H), 7.26 (d, *J* = 8.0 Hz, 2H), 7.15 (d, *J* = 7.2 Hz, 2H), 7.01 (d, *J* = 7.6 Hz,

2H), 3.42 (s, 2H), 3.27 (s, 3H), 1.28 (s, 9H).  $^{13}\text{C}$  NMR (150 MHz,  $\text{CDCl}_3$ )  $\delta$  170.6, 148.7, 143.6, 131.9, 129.2, 128.3, 127.4, 127.1, 124.7, 39.8, 37.1, 33.9, 30.9.

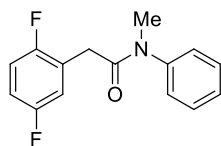

**2-(2,5-difluorophenyl)-N-methyl-N-phenylacetamide (1o):** 1.1 g, 86% yield. Yellow oil.  $^1\text{H}$  NMR (400 MHz,  $\text{CDCl}_3$ )  $\delta$  7.34 (t,  $J = 7.2$  Hz, 2H), 7.28 – 7.26 (m, 1H), 7.13 (d,  $J = 7.2$  Hz, 2H), 6.87 (br, 1H), 6.83 – 6.76 (m, 2H), 3.35 (s, 2H), 3.21 (s, 3H).  $^{13}\text{C}$  NMR (151 MHz,  $\text{CDCl}_3$ )  $\delta$  168.8, 158.8, 157.2 (d,  $J = 2.57$  Hz), 155.6 (d,  $J = 2.42$  Hz), 143.3, 129.5, 127.7, 126.9, 124.3 (d,  $J = 8.15$  Hz), 124.1 (d,  $J = 8.31$  Hz), 117.6 (d,  $J = 4.53$  Hz), 117.4 (d,  $J = 4.38$  Hz), 115.6 (d,  $J = 8.76$  Hz), 115.4 (d,  $J = 8.76$  Hz), 114.4 (d,  $J = 8.47$  Hz), 114.3 (d,  $J = 8.47$  Hz), 37.1, 33.7.

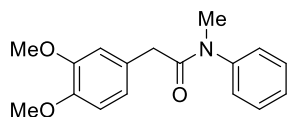

**2-(3,4-dimethoxyphenyl)-N-methyl-N-phenylacetamide (1p):** 1.2 g, 84% yield. Yellow oil.  $^1\text{H}$  NMR (400 MHz,  $\text{CDCl}_3$ )  $\delta$  7.33 – 7.27 (m, 3H), 7.06 (d,  $J = 6.4$  Hz, 2H), 6.78 – 6.72 (m, 1H), 6.64 (d,  $J = 8.0$  Hz, 1H), 6.53 (s, 1H), 6.46 (d,  $J = 7.4$  Hz, 1H), 3.75 (s, 3H), 3.72 (s, 3H), 3.34 (s, 2H), 3.19 (s, 3H).  $^{13}\text{C}$  NMR (151 MHz,  $\text{CDCl}_3$ )  $\delta$  170.9, 148.4, 147.4, 143.7, 129.4, 127.6, 127.6, 127.4, 120.8, 112.1, 110.8, 55.6, 55.4, 40.2, 37.3.

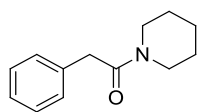

**2-phenyl-1-(piperidin-1-yl)ethan-1-one (3n):** 1.8 g, 89% yield. Colorless oil.  $^1\text{H}$  NMR (400 MHz,  $\text{CDCl}_3$ )  $\delta$  8.27 (d,  $J = 8.0$  Hz, 1H), 7.37 – 7.25 (m, 5H), 7.19 (q,  $J = 8.0$  Hz, 2H), 7.02 (t,  $J = 7.4$  Hz, 1H), 4.06 (t,  $J = 8.5$  Hz, 2H), 3.81 (s, 2H), 3.16 (t,  $J = 8.4$  Hz, 2H).  $^{13}\text{C}$  NMR (151 MHz,  $\text{CDCl}_3$ )  $\delta$  168.9, 135.1, 128.3, 128.2, 126.3, 46.9, 42.5, 40.8, 25.8, 25.2, 24.1.

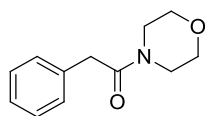

**1-morpholino-2-phenylethan-1-one (3o):** 1.7 g, 84% yield. Colorless oil.  $^1\text{H NMR}$  (400 MHz,  $\text{CDCl}_3$ )  $\delta$  7.25 – 7.21 (m, 2H), 7.16 – 7.14 (m, 3H), 3.63 (s, 2H), 3.52 (s, 4H), 3.34 (d,  $J = 11.2$  Hz, 4H).  $^{13}\text{C NMR}$  (151 MHz,  $\text{CDCl}_3$ )  $\delta$  169.1 (d,  $J = 1.5$  Hz), 134.5, 128.3 (d,  $J = 1.5$  Hz), 128.2, 126.4 (d,  $J = 1.2$  Hz), 66.3, 66.0, 46.1, 41.7, 40.3.

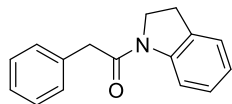

**1-(indolin-1-yl)-2-phenylethan-1-one (3p):** 1.9 g, 80% yield. Yellow oil.  $^1\text{H NMR}$  (400 MHz,  $\text{CDCl}_3$ )  $\delta$  8.27 (d,  $J = 8.0$  Hz, 1H), 7.37– 7.25 (m, 5H), 7.19 (q,  $J = 8.0$  Hz, 2H), 7.02 (t,  $J = 7.6$  Hz, 1H), 4.06 (t,  $J = 8.6$  Hz, 2H), 3.81 (s, 2H), 3.16 (t,  $J = 8.4$  Hz, 2H).  $^{13}\text{C NMR}$  (151 MHz,  $\text{CDCl}_3$ )  $\delta$  169.0, 143.0, 134.2, 131.0, 129.0, 128.7, 127.5, 126.9, 124.5, 123.7, 117.1, 48.1, 43.5, 28.0.

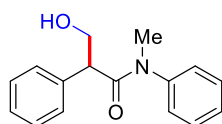

**3-hydroxy-N-methyl-N,2-diphenylpropanamide (2a):** 68 mg, 88% yield. White solid; mp: 122-123 °C.  $^1\text{H NMR}$  (400 MHz,  $\text{CDCl}_3$ )  $\delta$  7.28 – 7.24 (s, 3H), 7.19 – 7.15 (m, 3H), 6.93 – 6.90 (m, 4H), 4.08 (t,  $J = 9.6$  Hz, 1H), 3.76 (dd,  $J = 8.6, 4.6$  Hz, 1H), 3.65 (d,  $J = 9.6$  Hz, 1H), 3.26 (s, 3H), 3.11 (s, 1H).  $^{13}\text{C NMR}$  (101 MHz,  $\text{CDCl}_3$ )  $\delta$  172.5, 142.8, 136.5, 129.3, 129.0, 128.3, 128.0, 127.1, 127.0, 65.5, 51.9, 37.5. **HRMS** (ESI):  $m/z$   $[\text{M}+\text{H}]^+$  calcd for  $\text{C}_{16}\text{H}_{18}\text{NO}_2^+$ : 256.1332; found: 256.1325.

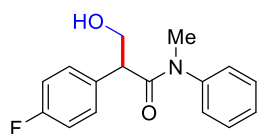

**2-(4-fluorophenyl)-3-hydroxy-N-methyl-N-phenylpropanamide (2b):** 56 mg, 68% yield. White solid; mp: 101-102 °C.  $^1\text{H NMR}$  (400 MHz,  $\text{CDCl}_3$ )  $\delta$  7.29 – 7.26 (m, 3H), 6.88 – 6.86 (m, 6H), 4.01 (t,  $J = 9.6$  Hz, 1H), 3.74 (dd,  $J = 8.2, 4.6$  Hz, 1H), 3.65 (dd,  $J = 10.8, 4.4$  Hz, 1H), 3.26 (s, 3H), 2.99 (s, 1H).  $^{13}\text{C NMR}$  (151 MHz,  $\text{CDCl}_3$ )  $\delta$  172.5, 162.0 (d,  $J = 244.5$  Hz), 142.8, 132.3 (d,  $J = 3.15$  Hz), 129.7 (d,  $J = 8.1$  Hz), 129.5, 128.0, 127.8, 115.3 (d,  $J = 21.0$  Hz), 65.6, 51.0, 37.6.  $^{19}\text{F NMR}$  (376 MHz,  $\text{CDCl}_3$ )  $\delta = -115.68 - 115.75$ . **HRMS** (ESI):  $m/z$   $[\text{M}+\text{H}]^+$  calcd for  $\text{C}_{16}\text{H}_{17}\text{FNO}_2^+$ : 274.1238; found: 274.1232.

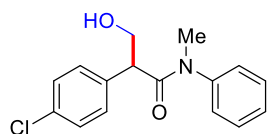

**2-(4-chlorophenyl)-3-hydroxy-N-methyl-N-phenylpropanamide (2c):** 69 mg, 80% yield. White solid; mp: 117-118 °C.  $^1\text{H NMR}$  (400 MHz,  $\text{CDCl}_3$ )  $\delta$  7.29 – 7.26 (m, 3H), 7.15 (d,  $J = 8.4$  Hz, 2H), 6.89 – 6.84 (m, 4H), 4.04 – 3.98 (m, 1H), 3.73 (dd,  $J = 8.4, 4.4$  Hz, 1H), 3.66 – 3.60 (m, 1H), 3.25 (s, 3H), 3.10 (s, 1H).  $^{13}\text{C NMR}$  (151 MHz,  $\text{CDCl}_3$ )  $\delta$  172.3, 142.8, 135.1, 133.1, 129.5, 129.5, 128.6, 128.1, 127.8, 65.5, 51.2, 37.6. **HRMS** (ESI):  $m/z$   $[\text{M}+\text{H}]^+$  calcd for  $\text{C}_{16}\text{H}_{17}\text{ClNO}_2^+$ : 290.0942; found: 290.0937.

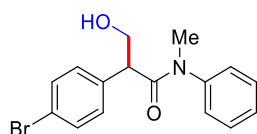

**2-(4-bromophenyl)-3-hydroxy-N-methyl-N-phenylpropanamide (2d):** 85 mg, 85% yield. White solid; mp: 128-129 °C.  $^1\text{H NMR}$  (400 MHz,  $\text{CDCl}_3$ )  $\delta$  7.33 – 7.26 (m, 5H), 6.89 (br, 2H), 6.81 – 6.78 (m, 2H), 4.00 (dd,  $J = 9.6, 8.8$  Hz, 1H), 3.71 (dd,  $J = 8.0, 4.4$  Hz, 1H), 3.66 (d,  $J = 10.6$  Hz, 1H), 3.26 (s, 3H), 2.95 (s, 1H).  $^{13}\text{C NMR}$  (151 MHz,  $\text{CDCl}_3$ )  $\delta$  172.2, 142.7, 135.6, 131.6, 129.9, 129.5, 128.1, 127.8, 121.2, 65.4, 51.2, 37.6. **HRMS** (ESI):  $m/z$   $[\text{M}+\text{H}]^+$  calcd for  $\text{C}_{16}\text{H}_{18}\text{BrNO}_2^+$ : 334.0437; found: 334.0429.

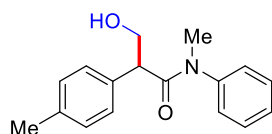

**3-hydroxy-N-methyl-N-phenyl-2-(p-tolyl)propanamide (2e):** 71 mg, 88% yield. White solid; mp: 111-112 °C.  $^1\text{H NMR}$  (400 MHz,  $\text{CDCl}_3$ )  $\delta$  7.27 (t,  $J = 4.4$  Hz, 3H), 6.99 (d,  $J = 7.6$  Hz, 2H), 6.89 (br, 2H), 6.80 (d,  $J = 8.0$  Hz, 2H), 4.03 (dd,  $J = 10.4, 8.4$  Hz, 1H), 3.72 (dd,  $J = 8.2, 4.6$  Hz, 1H), 3.64 (dd,  $J = 10.8, 4.4$  Hz, 1H), 3.26 (s, 3H), 2.83 (s, 1H), 2.29 (s, 3H).  $^{13}\text{C NMR}$  (151 MHz,  $\text{CDCl}_3$ )  $\delta$  172.8, 143.0, 136.8, 133.5, 129.4, 129.1, 128.0, 127.9, 127.9, 65.8, 51.5, 37.6, 21.0. **HRMS** (ESI):  $m/z$   $[\text{M}+\text{H}]^+$  calcd for  $\text{C}_{17}\text{H}_{20}\text{NO}_2^+$ : 270.1488; found: 270.1482.

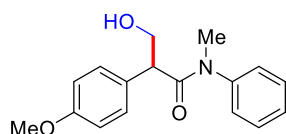



**3-hydroxy-2-(4-methoxyphenyl)-N-methyl-N-phenylpropanamide (2f):** 68 mg, 80% yield. White solid; mp: 94-95 °C.  $^1\text{H NMR}$  (400 MHz,  $\text{CDCl}_3$ )  $\delta$  7.29 – 7.28 (m, 3H), 6.89 (br, 2H), 6.82 (d,  $J = 8.8$  Hz, 2H), 6.72 (d,  $J = 8.8$  Hz, 2H), 4.05 – 3.99 (m, 1H), 3.76 (s, 3H), 3.69 (dd,  $J = 8.2, 4.6$  Hz, 1H), 3.67 – 3.58 (m, 1H), 3.25 (s, 3H), 2.89 (s, 1H).  $^{13}\text{C NMR}$  (151 MHz,  $\text{CDCl}_3$ )  $\delta$  172.9, 158.7, 143.0, 129.4, 129.2, 128.6, 127.9, 127.9, 113.9, 65.7, 55.2, 51.0, 37.5. **HRMS** (ESI):  $m/z$   $[\text{M}+\text{H}]^+$  calcd for  $\text{C}_{17}\text{H}_{20}\text{NO}_3^+$ : 286.1437; found: 286.1431.

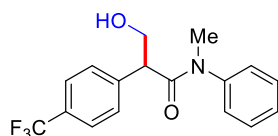

**(4-(trifluoromethyl)-3-hydroxy-N-methyl-N-phenylpropanamide (2g):** 44 mg, 45% yield. White solid; mp: 83-84 °C.  $^1\text{H NMR}$  (400 MHz,  $\text{CDCl}_3$ )  $\delta$  7.44 (d,  $J = 8.0$  Hz, 2H), 7.30 – 7.28 (m, 3H), 7.04 (d,  $J = 8.0$  Hz, 2H), 6.88 (br, 2H), 4.06 – 4.00 (m, 1H), 3.82 (dd,  $J = 8.0, 4.4$  Hz, 1H), 3.74 – 3.67 (m, 1H), 3.27 (s, 3H), 3.06 (br, 1H).  $^{13}\text{C NMR}$  (151 MHz,  $\text{CDCl}_3$ )  $\delta$  172.0, 142.7, 140.7, 129.6, 129.5 (dd,  $J = 32.3$  Hz), 128.5, 128.2, 127.8, 125.4 (dd,  $J = 3.6$  Hz), 124.0 (d,  $J = 270.5$  Hz), 65.4, 51.6, 37.6.  $^{19}\text{F NMR}$  (376 MHz,  $\text{CDCl}_3$ )  $\delta = -62.9$ . **HRMS** (ESI):  $m/z$   $[\text{M}+\text{H}]^+$  calcd for  $\text{C}_{17}\text{H}_{17}\text{F}_3\text{NO}_2^+$ : 324.1206; found: 324.1199.

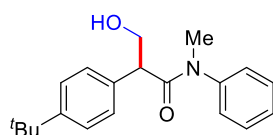

**2-(4-(tert-butyl)phenyl)-3-hydroxy-N-methyl-N-phenylpropanamide (2h):** 49 mg, 52% yield. White solid; mp: 109-110 °C.  $^1\text{H NMR}$  (400 MHz,  $\text{CDCl}_3$ )  $\delta$  7.26 (d,  $J = 1.2$  Hz, 3H), 7.19 – 7.17 (m, 2H), 6.90 (br, 2H), 6.85 – 6.83 (m, 2H), 4.10 – 4.06 (m, 1H), 3.75 – 3.72 (m, 1H), 3.65 – 3.62 (m, 1H), 3.24 (d,  $J = 1.6$  Hz, 3H), 1.26 (s, 9H).  $^{13}\text{C NMR}$  (151 MHz,  $\text{CDCl}_3$ )  $\delta$  172.9, 149.9, 142.9, 133.3, 129.3, 127.8, 127.8, 127.7, 125.2, 65.5, 51.4, 37.6, 34.3, 31.3. **HRMS** (ESI):  $m/z$   $[\text{M}+\text{H}]^+$  calcd for  $\text{C}_{20}\text{H}_{26}\text{NO}_2^+$ : 312.1958; found: 312.1954.

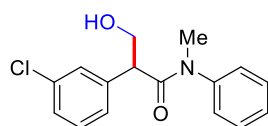

**2-(3-chlorophenyl)-3-hydroxy-N-methyl-N-phenylpropanamide (2i):** 41 mg, 47% yield. White solid; mp: 96-97 °C.  $^1\text{H NMR}$  (400 MHz,  $\text{CDCl}_3$ )  $\delta$  7.30 – 7.27 (m, 3H), 7.17 (d,  $J = 8.0$  Hz, 1H), 7.11 (t,  $J = 7.6$  Hz, 1H), 6.87 (t,  $J = 1.6$  Hz, 3H), 6.79 (d,  $J = 7.6$  Hz, 1H), 4.02 (t,  $J = 7.8$  Hz, 1H), 3.72 (dd,  $J = 8.0, 4.4$  Hz, 1H), 3.67 – 3.64 (m, 1H), 3.26 (s, 3H), 3.03 (s, 1H).  $^{13}\text{C NMR}$  (151 MHz,  $\text{CDCl}_3$ )  $\delta$  172.0, 142.7, 138.5, 134.2, 129.6, 129.5, 128.3, 128.1, 127.8, 127.4, 126.3, 65.4, 51.5, 37.6. **HRMS** (ESI):  $m/z$   $[\text{M}+\text{H}]^+$  calcd for  $\text{C}_{16}\text{H}_{17}\text{ClNO}_2^+$ : 290.0942; found: 290.0937.

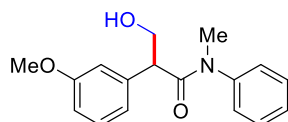

**3-hydroxy-2-(3-methoxyphenyl)-N-methyl-N-phenylpropanamide (2j):** 62 mg, 72% yield. White solid; mp: 91-92 °C.  $^1\text{H NMR}$  (400 MHz,  $\text{CDCl}_3$ )  $\delta$  7.28 – 7.24 (m, 3H), 7.09 (t,  $J = 8.0$  Hz, 1H), 6.91 (s, 2H), 6.73 (dd,  $J = 8.4, 2.4$  Hz, 1H), 6.50 (d,  $J = 8.0$  Hz, 1H), 6.45 (d,  $J = 2.0$  Hz, 1H), 4.10 – 4.04 (m, 1H), 3.74 – 3.70 (m, 1H), 3.70 (s, 3H), 3.67 – 3.62 (m, 1H), 3.26 (s, 3H), 2.94 (s, 1H).  $^{13}\text{C NMR}$  (151 MHz,  $\text{CDCl}_3$ )  $\delta$  172.4, 159.5, 142.9, 138.0, 129.30, 127.9, 127.8, 120.5, 113.5, 112.8, 65.6, 55.1, 52.0, 37.5. **HRMS** (ESI):  $m/z$   $[\text{M}+\text{H}]^+$  calcd for  $\text{C}_{17}\text{H}_{20}\text{NO}_3^+$ : 286.1437; found: 286.1431.

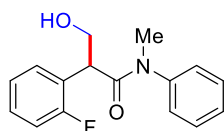

**(2-fluorophenyl)-3-hydroxy-N-methyl-N-phenylpropanamide (2k):** 46 mg, 56% yield. White solid; mp: 100-101 °C.  $^1\text{H NMR}$  (400 MHz,  $\text{CDCl}_3$ )  $\delta$  7.31 – 7.21 (m, 4H), 7.19 – 7.13 (m, 1H), 7.06 – 7.02 (m, 1H), 6.84 – 6.78 (m, 3H), 4.11 (q,  $J = 4.0$  Hz, 1H), 3.96 (dd,  $J = 10.8, 8.0$  Hz, 1H), 3.72 – 3.68 (m, 1H), 3.27 (d,  $J = 2.0$  Hz, 3H).  $^{13}\text{C NMR}$  (151 MHz,  $\text{CDCl}_3$ )  $\delta$  172.6, 160.04 (d,  $J = 245.4$  Hz), 142.4, 129.48 (d,  $J = 3.5$  Hz), 129.4, 128.80 (d,  $J = 8.3$  Hz), 128.0, 127.4, 124.10 (d,  $J = 3.6$  Hz), 123.74 (d,  $J = 15.2$  Hz), 115.10 (d,  $J = 22.4$  Hz), 64.3, 43.9, 37.6.  $^{19}\text{F NMR}$  (376 MHz,  $\text{CDCl}_3$ )  $\delta = -119.38 - -119.44$  (m). **HRMS** (ESI):  $m/z$   $[\text{M}+\text{H}]^+$  calcd for  $\text{C}_{16}\text{H}_{17}\text{FNO}_2^+$ : 274.1238; found: 274.1232.

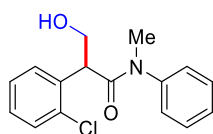

**2-(2-chlorophenyl)-3-hydroxy-N-methyl-N-phenylpropanamide (2l):** 55 mg, 63% yield. White solid; mp:107-108 °C.  $^1\text{H NMR}$  (400 MHz,  $\text{CDCl}_3$ )  $\delta$  7.39 (d,  $J = 7.6$  Hz, 1H), 7.23 – 7.15 (m, 4H), 7.12 (d,  $J = 4.8$  Hz, 2H), 6.77 (br, 2H), 4.25 (q,  $J = 3.9$  Hz, 1H), 3.92 – 3.86 (m, 1H), 3.74 – 3.68 (m, 1H), 3.31 (t,  $J = 7.0$  Hz, 1H), 3.27 (s, 3H).  $^{13}\text{C NMR}$  (151 MHz,  $\text{CDCl}_3$ )  $\delta$  172.8, 142.3, 134.3, 133.9, 129.5, 129.4, 129.3, 128.4, 128.0, 127.5, 126.8, 63.8, 48.1, 37.6. HRMS (ESI):  $m/z$   $[\text{M}+\text{H}]^+$  calcd for  $\text{C}_{16}\text{H}_{17}\text{ClNO}_2^+$ : 290.0942; found: 290.0937.

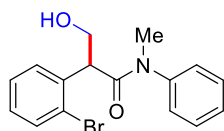

**2-(2-bromophenyl)-3-hydroxy-N-methyl-N-phenylpropanamide (2m):** 74 mg, 74% yield. White solid; mp: 128-129 °C.  $^1\text{H NMR}$  (400 MHz,  $\text{CDCl}_3$ )  $\delta$  7.40 (dd,  $J = 7.8, 1.4$  Hz, 1H), 7.33 (dd,  $J = 8.0, 1.2$  Hz, 1H), 7.27 – 7.21 (m, 4H), 7.05 (t,  $J = 7.8$  Hz, 1H), 6.77 (s, 2H), 4.23 (q,  $J = 3.9$  Hz, 1H), 3.90 – 3.84 (m, 1H), 3.76 – 3.70 (m, 1H), 3.30 (br, 1H), 3.27 (s, 3H).  $^{13}\text{C NMR}$  (151 MHz,  $\text{CDCl}_3$ )  $\delta$  172.8, 142.3, 136.0, 132.7, 129.6, 129.4, 128.6, 128.0, 127.6, 127.5, 124.7, 63.8, 50.9, 37.7. HRMS (ESI):  $m/z$   $[\text{M}+\text{H}]^+$  calcd for  $\text{C}_{16}\text{H}_{17}\text{BrNO}_2^+$ : 334.0437; found: 334.0429.

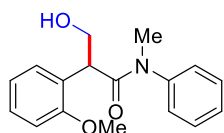

**2-(2-methoxyphenyl)-3-hydroxy-N-methyl-N-phenylpropanamide (2n):** 56 mg, 66% yield. White solid; mp: 110-111 °C.  $^1\text{H NMR}$  (400 MHz,  $\text{CDCl}_3$ )  $\delta$  7.22 – 7.12 (m, 5H), 6.85 (t,  $J = 7.4$  Hz, 1H), 6.77 (d,  $J = 6.4$  Hz, 2H), 6.57 (d,  $J = 8.0$  Hz, 1H), 4.27 (q,  $J = 4.1$  Hz, 1H), 3.91 (t,  $J = 9.2$  Hz, 1H), 3.64 – 3.61 (m, 1H), 3.36 (s, 3H), 3.25 (s, 3H), 3.22 (br, 1H).  $^{13}\text{C NMR}$  (151 MHz,  $\text{CDCl}_3$ )  $\delta$  173.9, 156.2, 142.7, 128.9, 128.6, 128.2, 127.8, 127.3, 125.0, 120.4, 109.9, 64.2, 54.7, 44.3, 37.5. HRMS (ESI):  $m/z$   $[\text{M}+\text{H}]^+$  calcd for  $\text{C}_{17}\text{H}_{20}\text{NO}_3^+$ : 286.1437; found: 286.1431.

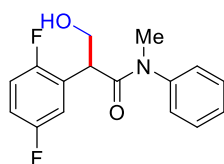

**(2,5-difluorophenyl)-3-hydroxy-N-methyl-N-phenylpropanamide (2o):** 45 mg, 51% yield. White solid; mp: 124-125 °C.  $^1\text{H NMR}$  (400 MHz,  $\text{CDCl}_3$ )  $\delta$  7.30 – 7.13 (m, 5H), 6.85 – 6.75 (m, 3H), 4.05 – 4.01 (m, 1H), 3.69 (dd,  $J = 8.2, 4.6$  Hz, 1H), 3.64 – 3.60 (m, 1H), 3.23 (s, 3H), 3.18 (s, 1H).  $^{13}\text{C NMR}$  (151 MHz,  $\text{CDCl}_3$ )  $\delta$  172.0, 159.3 (d,  $J = 2.42$  Hz), 157.7 (d,  $J = 2.27$  Hz), 156.8 (d,  $J = 2.27$  Hz), 155.2 (d,  $J = 2.57$  Hz), 142.4, 129.6, 128.1, 127.4, 125.5 (d,  $J = 8.15$  Hz), 125.4 (d,  $J = 8.00$  Hz), 116.2 (d,  $J = 1.51$  Hz), 116.1 (d,  $J = 11.02$  Hz), 116.0, 115.9 (d,  $J = 11.93$  Hz), 115.3 (d,  $J = 8.61$  Hz), 115.2 (d,  $J = 8.61$  Hz), 64.1, 43.8, 37.6.  $^{19}\text{F NMR}$  (376 MHz,  $\text{CDCl}_3$ )  $\delta = -118.64 - -118.75$  (m),  $-125.12 - -125.22$  (m). **HRMS** (ESI):  $m/z$   $[\text{M}+\text{H}]^+$  calcd for  $\text{C}_{16}\text{H}_{16}\text{F}_2\text{NO}_2^+$ : 292.1143; found: 292.1142.

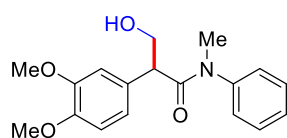

**2-(3,4-dimethoxyphenyl)-3-hydroxy-N-methyl-N-phenylpropanamide (2p):** 68 mg, 72% yield. White solid; mp: 135-136 °C.  $^1\text{H NMR}$  (400 MHz,  $\text{CDCl}_3$ )  $\delta$  7.27 – 7.26 (m, 3H), 6.89 (br, 2H), 6.67 (d,  $J = 8.4$  Hz, 1H), 6.46 (d,  $J = 8.4$  Hz, 1H), 6.36 (d,  $J = 1.6$  Hz, 1H), 4.05 (dd,  $J = 10.8, 8.4$  Hz, 1H), 3.85 – 3.80 (m, 1H), 3.80 (s, 3H), 3.71 (s, 3H), 3.67 (q,  $J = 4.4$  Hz, 1H), 3.63 – 3.57 (m, 1H), 3.23 (s, 3H).  $^{13}\text{C NMR}$  (151 MHz,  $\text{CDCl}_3$ )  $\delta$  172.7, 148.7, 148.0, 142.9, 129.3, 128.9, 127.9, 127.8, 120.2, 111.3, 111.0, 65.5, 55.8, 55.6, 51.4, 37.5. **HRMS** (ESI):  $m/z$   $[\text{M}+\text{H}]^+$  calcd for  $\text{C}_{18}\text{H}_{22}\text{NO}_4^+$ : 316.1543; found: 316.1537.

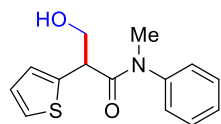

**3-hydroxy-N-methyl-N-phenyl-2-(thiophen-2-yl)propanamide (2q):** 70 mg, 89% yield. White solid; mp: 117-118 °C.  $^1\text{H NMR}$  (400 MHz,  $\text{CDCl}_3$ )  $\delta$  7.38 – 7.31 (m, 3H), 7.12 (d,  $J = 5.2$  Hz, 1H), 7.07 – 7.06 (m, 2H), 6.85 (dd,  $J = 5.0, 3.4$  Hz, 1H), 6.64 (d,  $J = 3.2$  Hz, 1H), 4.10 – 4.02 (m, 2H), 3.75 – 3.68 (m, 1H), 3.29 (s, 3H).  $^{13}\text{C NMR}$  (151 MHz,  $\text{CDCl}_3$ )  $\delta$  171.9, 142.9, 138.3, 129.6, 128.0, 127.6, 126.4, 125.8, 124.7, 65.8, 46.3, 37.6. **HRMS** (ESI):  $m/z$   $[\text{M}+\text{H}]^+$  calcd for  $\text{C}_{14}\text{H}_{16}\text{NO}_2\text{S}^+$ : 262.0896; found: 262.0896.

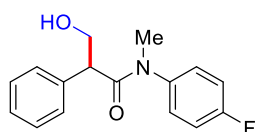

***N*-(4-fluorophenyl)-3-hydroxy-*N*-methyl-2-phenylpropanamide (4a):** 48 mg, 58% yield. White solid; mp: 105-106 °C.  $^1\text{H NMR}$  (400 MHz,  $\text{CDCl}_3$ )  $\delta$  7.19 – 7.17 (m, 3H), 6.91 – 6.89 (m, 4H), 6.84 (s, 2H), 4.10 – 4.05 (m, 1H), 3.71 (q,  $J = 4.4$  Hz, 1H), 3.62 (d,  $J = 10.6$  Hz, 1H), 3.22 (s, 3H), 3.17 (s, 1H).  $^{13}\text{C NMR}$  (151 MHz,  $\text{CDCl}_3$ )  $\delta$  172.6, 161.7 (d,  $J = 246.0$  Hz), 138.8 (d,  $J = 3.0$  Hz), 136.3, 129.7 (d,  $J = 7.5$  Hz), 128.5, 128.0, 127.2, 116.2 (d,  $J = 22.5$  Hz), 65.6, 52.1, 37.7.  $^{19}\text{F NMR}$  (376 MHz,  $\text{CDCl}_3$ )  $\delta = -113.40 - -113.47$  (m). HRMS (ESI):  $m/z$   $[\text{M}+\text{H}]^+$  calcd for  $\text{C}_{16}\text{H}_{17}\text{FNO}_2^+$ : 274.1238; found: 274.1232.

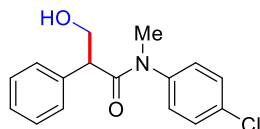

***N*-(4-chlorophenyl)-3-hydroxy-*N*-methyl-2-phenylpropanamide (4b):** 77 mg, 89% yield. White solid; mp: 91-92 °C.  $^1\text{H NMR}$  (400 MHz,  $\text{CDCl}_3$ )  $\delta$  7.24 – 7.15 (m, 5H), 6.93 – 6.91 (m, 2H), 6.80 (d,  $J = 6.0$  Hz, 2H), 4.07 (t,  $J = 9.8$  Hz, 1H), 3.72 (dd,  $J = 8.6, 4.6$  Hz, 1H), 3.64 (dd,  $J = 10.6, 3.8$  Hz, 1H), 3.24 (s, 3H), 2.87 (s, 1H).  $^{13}\text{C NMR}$  (151 MHz,  $\text{CDCl}_3$ )  $\delta$  172.5, 141.4, 136.3, 133.8, 129.6, 129.3, 128.6, 128.1, 127.3, 65.7, 52.2, 37.6. HRMS (ESI):  $m/z$   $[\text{M}+\text{H}]^+$  calcd for  $\text{C}_{16}\text{H}_{17}\text{ClNO}_2^+$ : 290.0942; found: 290.0937.

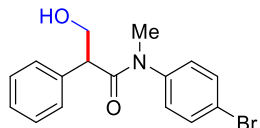

***N*-(4-bromophenyl)-3-hydroxy-*N*-methyl-2-phenylpropanamide (4c):** 80 mg, 80% yield. White solid; mp: 129-130 °C.  $^1\text{H NMR}$  (400 MHz,  $\text{CDCl}_3$ )  $\delta$  7.38 (d,  $J = 8.4$  Hz, 2H), 7.20 – 7.19 (m, 3H), 6.92 (dd,  $J = 6.2, 3.0$  Hz, 2H), 6.75 (d,  $J = 5.6$  Hz, 2H), 4.07 (dd,  $J = 11, 9.0$  Hz, 1H), 3.72 (dd,  $J = 8.4, 4.8$  Hz, 1H), 3.63 (dd,  $J = 11.0, 4.7$  Hz, 1H), 3.23 (s, 3H).  $^{13}\text{C NMR}$  (151 MHz,  $\text{CDCl}_3$ )  $\delta$  172.4, 141.9, 136.2, 132.5, 129.6, 128.6, 128.0, 127.3, 121.7, 65.6, 52.1, 37.5. HRMS (ESI):  $m/z$   $[\text{M}+\text{H}]^+$  calcd for  $\text{C}_{16}\text{H}_{17}\text{BrNO}_2^+$ : 334.0437; found: 334.0429.

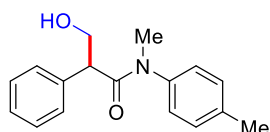

**3-hydroxy-N-methyl-2-phenyl-N-(p-tolyl)propanamide (4d):** 70 mg, 87% yield. White solid; mp: 118-119 °C. <sup>1</sup>H NMR (400 MHz, CDCl<sub>3</sub>) δ 7.19 – 7.18 (m, 3H), 7.06 (d, *J* = 8.0 Hz, 2H), 7.00 – 6.93 (m, 2H), 6.76 (s, 2H), 4.12 – 4.03 (m, 1H), 3.76 (dd, *J* = 8.4, 4.8 Hz, 1H), 3.67 – 3.64 (m, 1H), 3.23 (s, 3H), 3.07 (s, 1H), 2.34 (s, 3H). <sup>13</sup>C NMR (151 MHz, CDCl<sub>3</sub>) δ 172.7, 140.3, 137.7, 136.7, 129.9, 128.4, 128.1, 127.5, 127.0, 65.7, 51.7, 37.6, 21.0. HRMS (ESI): *m/z* [M+H]<sup>+</sup> calcd for C<sub>17</sub>H<sub>20</sub>NO<sub>2</sub><sup>+</sup>: 270.1488; found: 270.1482.

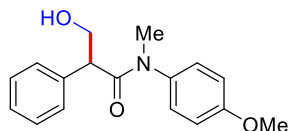

**3-hydroxy-N-(4-methoxyphenyl)-N-methyl-2-phenylpropanamide (4e):** 53 mg, 62% yield. White solid; mp:97-98 °C. <sup>1</sup>H NMR (400 MHz, CDCl<sub>3</sub>) δ 7.19 – 7.18 (m, 3H), 6.94 – 6.92 (m, 2H), 6.76 (br, 3H), 4.08 – 4.02 (m, 1H), 3.79 (s, 3H), 3.75 (dd, *J* = 8.4, 4.4 Hz, 1H), 3.70 – 3.60 (m, 1H), 3.22 (s, 3H), 3.02 (t, *J* = 6.5 Hz, 1H). <sup>13</sup>C NMR (151 MHz, CDCl<sub>3</sub>) δ 173.0, 158.9, 136.6, 135.7, 128.9, 128.4, 128.1, 127.1, 114.4, 65.7, 55.4, 51.8, 37.7. HRMS (ESI): *m/z* [M+H]<sup>+</sup> calcd for C<sub>17</sub>H<sub>20</sub>NO<sub>3</sub><sup>+</sup>: 286.1437; found: 286.1431.

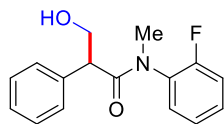

**N-(2-fluorophenyl)-3-hydroxy-N-methyl-2-phenylpropanamide (4f):** 54 mg, 66% yield. White solid; mp:110-112 °C. <sup>1</sup>H NMR (400 MHz, CDCl<sub>3</sub>) δ 7.39 – 7.31 (m, 1H), 7.30 – 7.22 (m, 1H), 7.20 – 7.18 (m, 3H), 7.15 – 7.08 (m, 1H), 6.91 (q, *J* = 3.1Hz, 1H), 6.88 – 6.84 (m, 1H), 6.79 – 6.75 (m, 1H), 6.48 – 6.43 (m, 1H), 4.14 – 4.01 (m, 1H), 3.84 – 3.80 (m, 1H), 3.70 – 3.65 (m, 1H), 3.62 – 3.56 (m, 1H), 3.26 – 3.20 (m, 3H). <sup>13</sup>C NMR (151 MHz, CDCl<sub>3</sub>) δ 172.9 (d, *J* = 19.5 Hz), 158.0 (dd, *J* = 249.8, 96.8 Hz), 135.8 (d, *J* = 196.5 Hz), 130.2 (dd, *J* = 13.5, 7.5 Hz), 129.9 (t, *J* = 6.8 Hz), 128.3 (dd, *J* = 143.3, 80.3 Hz), 128.4 (d, *J* = 30.0 Hz), 127.9 (d, *J* = 19.5 Hz), 127.1 (d, *J* = 13.5 Hz), 124.6 (dd, *J* = 21.8, 3.75 Hz), 116.6 (dd, *J* = 19.5, 3.0 Hz), 65.5 (d, *J* = 16.5 Hz), 52.3 (d, *J* = 15.0 Hz), 36.7 – 36.4 (m). HRMS (ESI): *m/z* [M+H]<sup>+</sup> calcd for C<sub>16</sub>H<sub>17</sub>FNO<sub>2</sub><sup>+</sup>: 274.1238; found: 274.1232. <sup>19</sup>F NMR (376 MHz, CDCl<sub>3</sub>) δ = -119.23 (s), -121.92 (s).

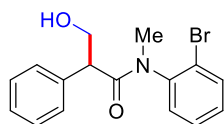

***N*-(2-bromophenyl)-3-hydroxy-*N*-methyl-2-phenylpropanamide (4g):** 46 mg, 46% yield. White solid; mp:130-131 °C. <sup>1</sup>H NMR (400 MHz, CDCl<sub>3</sub>) δ 7.33 – 7.31 (m, 1H), 7.26 – 7.23 (m, 4H), 6.95 – 6.84 (m, 4H), 4.14 (dd, *J* = 10.8, 8.8 Hz, 1H), 3.77 (dd, *J* = 8.6, 4.6 Hz, 1H), 3.68 (dd, *J* = 11.0, 4.6 Hz, 1H), 3.28 (s, 3H), 3.20 (s, 1H). <sup>13</sup>C NMR (101 MHz, CDCl<sub>3</sub>) δ 172.3, 143.9, 136.2, 134.6, 130.2, 128.5, 128.4, 128.1, 128.1, 127.3, 126.1, 65.5, 52.3, 37.4. HRMS (ESI): *m/z* [M+H]<sup>+</sup> calcd for C<sub>16</sub>H<sub>17</sub>BrNO<sub>2</sub><sup>+</sup>: 334.0437; found: 334.0429.

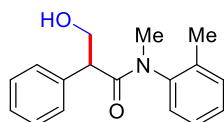

***3*-hydroxy-*N*-methyl-2-phenyl-*N*-(*o*-tolyl)propanamide (4h):** 63 mg, 78% yield. White solid; mp: 115-116 °C. <sup>1</sup>H NMR (400 MHz, CDCl<sub>3</sub>) δ 7.49 – 7.43 (m, 0.5H), 7.31 – 7.12 (m, 5H), 7.02 (d, *J* = 7.2 Hz, 0.5H), 6.94 – 6.90 (m, 1.5H), 6.80 (d, *J* = 7.6 Hz, 1H), 6.36 (d, *J* = 7.6 Hz, 0.5H), 4.09 (q, *J* = 11.1 Hz, 1H), 3.79 (dd, *J* = 8.4, 4.4 Hz, 0.5H), 3.65 – 3.59 (m, 1H), 3.40 (dd, *J* = 8.6, 4.6 Hz, 0.5H), 3.17 (d, *J* = 9.2 Hz, 3H), 2.32 (s, 1.5H), 1.36 (s, 1.5H). <sup>13</sup>C NMR (151 MHz, CDCl<sub>3</sub>) δ 172.7, 172.6, 141.4, 141.3, 136.8, 136.3, 135.5, 135.3, 131.4, 131.2, 128.9, 128.7, 128.5, 128.4, 128.3, 128.2, 127.3, 127.2, 127.1, 126.8, 65.6, 65.5, 52.5, 51.9, 36.2, 36.1, 17.5, 16.4. HRMS (ESI): *m/z* [M+H]<sup>+</sup> calcd for C<sub>17</sub>H<sub>20</sub>NO<sub>2</sub><sup>+</sup>: 270.1488; found: 270.1482.

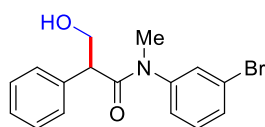

***N*-(3-bromophenyl)-3-hydroxy-*N*-methyl-2-phenylpropanamide (4i):** 52 mg, 52% yield. White solid; mp:125-127 °C. <sup>1</sup>H NMR (400 MHz, CDCl<sub>3</sub>) δ 7.33 – 7.23 (m, 5H), 6.95 – 6.85 (m, 4H), 4.10 – 4.06 (m, 1H), 3.71 (dd, *J* = 5.6, 3.2 Hz, 1H), 3.67 – 3.63 (m, 1H), 3.24 (s, 3H), 2.89 (s, 1H). <sup>13</sup>C NMR (151 MHz, CDCl<sub>3</sub>) δ 172.4, 144.0, 136.2, 131.3, 131.1, 130.5, 128.6, 128.0, 127.3, 126.6, 122.5, 65.5, 52.4, 37.5. HRMS (ESI): *m/z* [M+H]<sup>+</sup> calcd for C<sub>16</sub>H<sub>17</sub>BrNO<sub>2</sub><sup>+</sup>: 334.0437; found: 334.0429.

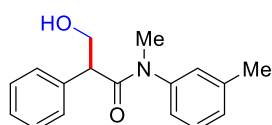

**3-hydroxy-N-methyl-2-phenyl-N-(m-tolyl)propanamide (4j):** 61 mg, 76% yield. White solid; mp:112-113 °C.  $^1\text{H NMR}$  (400 MHz,  $\text{CDCl}_3$ )  $\delta$  7.19 – 7.07 (m, 3H), 7.11 (dd,  $J = 24.2, 7.6$  Hz, 2H), 6.92 – 6.90 (m, 2H), 6.70 (s, 1H), 6.58 (s, 1H), 4.05 (t,  $J = 9.4$  Hz, 1H), 3.73 (dd,  $J = 8.2, 4.6$  Hz, 1H), 3.66 (d,  $J = 10.4$  Hz, 1H), 3.24 (s, 3H), 2.99 (s, 1H), 2.21 (s, 3H).  $^{13}\text{C NMR}$  (151 MHz,  $\text{CDCl}_3$ )  $\delta$  172.6, 142.7, 139.3, 136.8, 129.1, 128.6, 128.6, 128.3, 128.1, 127.0, 124.6, 65.6, 52.0, 37.5, 21.0. **HRMS** (ESI):  $m/z$   $[\text{M}+\text{H}]^+$  calcd for  $\text{C}_{17}\text{H}_{20}\text{NO}_2^+$ : 270.1488; found: 270.1482.

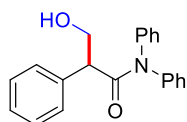

**3-hydroxy-N,N,2-triphenylpropanamide (4k):** 95 mg, 83% yield. colorless oil.  $^1\text{H NMR}$  (400 MHz,  $\text{CDCl}_3$ )  $\delta$  7.33 – 7.19 (m, 11H), 7.00 – 6.98 (m, 4H), 4.19 – 4.13 (m, 1H), 4.00 (q,  $J = 4.4$  Hz, 1H), 3.73 – 3.70 (m, 1H), 2.97 (s, 1H).  $^{13}\text{C NMR}$  (151 MHz,  $\text{CDCl}_3$ )  $\delta$  173.0, 142.4, 141.6, 136.1, 129.3, 129.2, 128.9, 128.6, 128.1, 127.9, 127.3, 126.4, 126.3, 65.7, 52.9. **HRMS** (ESI):  $m/z$   $[\text{M}+\text{H}]^+$  calcd for  $\text{C}_{21}\text{H}_{20}\text{NO}_2^+$ : 318.1489; found: 318.1488.

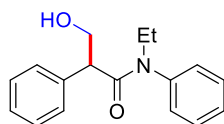

**N-ethyl-3-hydroxy-N,2-diphenylpropanamide (4l):** 81 mg, 76% yield. White solid; mp:115-116 °C.  $^1\text{H NMR}$  (400 MHz,  $\text{CDCl}_3$ )  $\delta$  7.43 – 7.14 (m, 7H), 6.89 (dd,  $J = 6.4, 3.2$  Hz, 2H), 6.83 (br, 1H), 4.07 – 4.00 (m, 1H), 3.82 – 3.62 (m, 4H), 3.01 (br, 1H), 1.09 (t,  $J = 7.2$  Hz, 3H).  $^{13}\text{C NMR}$  (151 MHz,  $\text{CDCl}_3$ )  $\delta$  172.0, 141.1, 136.7, 129.2, 128.9, 128.4, 128.1, 127.9, 127.0, 65.7, 52.3, 44.3, 12.9. **HRMS** (ESI):  $m/z$   $[\text{M}+\text{H}]^+$  calcd for  $\text{C}_{17}\text{H}_{20}\text{NO}_2^+$ : 285.1598; found: 270.1482.

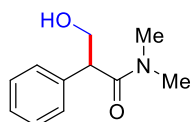

**3-hydroxy-N,N-dimethyl-2-phenylpropanamide (4m):** 30 mg, 52% yield. White solid; mp:81-82 °C.  $^1\text{H NMR}$  (400 MHz,  $\text{CDCl}_3$ )  $\delta$  7.33 (t,  $J = 7.4$  Hz, 2H), 7.28 (d,  $J = 7.2$  Hz, 1H), 7.22 (d,  $J = 7.6$  Hz, 2H), 4.05 – 4.00 (m, 1H), 3.94 (dd,  $J = 8.4, 4.0$  Hz, 1H), 3.74 (dd,  $J = 11.6, 3.8$  Hz, 1H), 3.27 (s, 1H), 2.98 (s, 3H), 2.80



(s, 3H).  $^{13}\text{C}$  NMR (151 MHz,  $\text{CDCl}_3$ )  $\delta$  172.7, 136.2, 129.0, 128.0, 127.4, 66.0, 52.0, 36.3 (d,  $J = 207.0$  Hz).

HRMS (ESI):  $m/z$   $[\text{M}+\text{H}]^+$  calcd for  $\text{C}_{11}\text{H}_{16}\text{NO}_2^+$ : 194.1176; found: 194.1171.

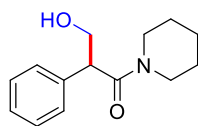

**3-hydroxy-2-phenyl-1-(piperidin-1-yl)propan-1-one (4n):** 32 mg, 46% yield. White solid; mp: 136-137

$^1\text{H}$  NMR (400 MHz,  $\text{CDCl}_3$ )  $\delta$  7.35 – 7.21 (m, 5H), 4.06 – 4.00 (m, 1H), 3.93 (dd,  $J = 8.4, 4.0$  Hz, 1H), 3.80 – 3.71 (m, 2H), 3.41 – 3.32 (m, 2H), 3.26 – 3.15 (m, 2H), 1.56 – 1.41 (m, 4H), 1.34 – 1.26 (m, 1H), 0.90 (br, 1H).  $^{13}\text{C}$  NMR (151 MHz,  $\text{CDCl}_3$ )  $\delta$  170.7, 136.6, 128.9, 128.0, 127.3, 66.0, 51.8, 46.4, 42.9, 25.6, 25.4, 24.3. HRMS (ESI):  $m/z$   $[\text{M}+\text{H}]^+$  calcd for  $\text{C}_{14}\text{H}_{20}\text{NO}_2^+$ : 234.1489; found: 234.1489.

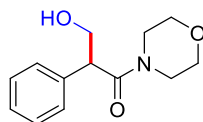

**3-hydroxy-1-morpholino-2-phenylpropan-1-one (4o):** 38 mg, 54% yield. White solid; mp: 139-140  $^{\circ}\text{C}$ .

$^1\text{H}$  NMR (400 MHz,  $\text{CDCl}_3$ )  $\delta$  7.35 – 7.32 (m, 2H), 7.29 – 7.25 (m, 1H), 7.21 – 7.19 (m, 2H), 4.06 (dd,  $J = 11.0, 8.6$  Hz, 1H), 3.91 (dd,  $J = 8.6, 4.2$  Hz, 1H), 3.85 – 3.79 (m, 1H), 3.76 – 3.63 (m, 2H), 3.56 – 3.43 (m, 3H), 3.35 – 3.29 (m, 1H), 3.23 – 3.19 (m, 2H), 3.07 – 3.02 (m, 1H).  $^{13}\text{C}$  NMR (151 MHz,  $\text{CDCl}_3$ )  $\delta$  171.1, 136.0, 129.1, 127.9, 127.6, 66.6, 66.0, 65.7, 51.8, 45.8, 42.1. HRMS (ESI):  $m/z$   $[\text{M}+\text{H}]^+$  calcd for  $\text{C}_{13}\text{H}_{18}\text{NO}_3^+$ : 236.1281; found: 236.1275.

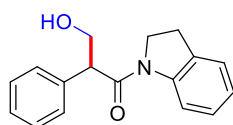

**3-hydroxy-1-(indolin-1-yl)-2-phenylpropan-1-one (4p):** 49 mg, 61% yield. yellow oil.  $^1\text{H}$  NMR (400

MHz,  $\text{CDCl}_3$ )  $\delta$  8.33 (d,  $J = 8.4$  Hz, 1H), 7.37 – 7.21 (m, 6H), 7.14 (d,  $J = 7.6$  Hz, 1H), 7.03 (t,  $J = 7.2$  Hz, 1H), 4.22 – 4.17 (m, 1H), 4.08 – 3.98 (m, 2H), 3.84 – 3.78 (m, 1H), 3.65 – 3.58 (m, 1H), 3.15 – 3.07 (m, 2H), 3.00 – 2.91 (br, 1H).  $^{13}\text{C}$  NMR (151 MHz,  $\text{CDCl}_3$ )  $\delta$  170.8, 142.8, 135.3, 131.2, 129.1, 128.2, 127.7, 127.5, 124.6, 124.1, 117.3, 65.7, 54.7, 47.5, 27.9. HRMS (ESI):  $m/z$   $[\text{M}+\text{H}]^+$  calcd for  $\text{C}_{17}\text{H}_{18}\text{NO}_2^+$ : 268.1331; found: 268.1332.

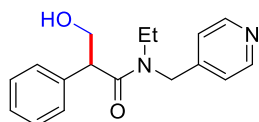

***N*-ethyl-3-hydroxy-2-phenyl-*N*-(pyridin-4-ylmethyl)propanamide (4q)**<sup>3</sup>: 55 mg, 65% yield. White solid; mp:96-97 °C. <sup>1</sup>H NMR (400 MHz, CDCl<sub>3</sub>) δ 8.48 – 8.45 (m, 2H), 7.36 – 7.16 (m, 5H), 6.98 (dd, *J* = 40.8, 5.4 Hz, 2H), 4.72 (d, *J* = 16.0 Hz, 1H), 4.44 (dd, *J* = 16.0, 9.2 Hz, 1H), 4.23 – 4.02 (m, 2H), 3.80 – 3.68 (m, 2H), 3.36 – 3.27 (m, 1H), 3.18 – 3.06 (m, 1H), 1.08 (t, *J* = 7.1 Hz, 1H), 0.92 (t, *J* = 7.1 Hz, 2H). <sup>13</sup>C NMR (151 MHz, CDCl<sub>3</sub>) δ 172.5, 172.6, 150.1, 149.8, 146.7, 145.9, 136.1, 135.8, 129.1, 129.0, 128.0, 127.8, 127.7, 127.6, 122.1, 121.3, 65.8, 52.0, 51.9, 49.2, 47.3, 42.2, 41.2, 13.4, 12.3. HRMS (ESI): *m/z* [M+H]<sup>+</sup> calcd for C<sub>17</sub>H<sub>21</sub>N<sub>2</sub>O<sub>2</sub><sup>+</sup>: 285.1598; found: 285.1597.

## 5. Unsuccessful substrates

### 5.1 Scope of 2-alkyl-*N*-methyl-*N*-phenylacetamides

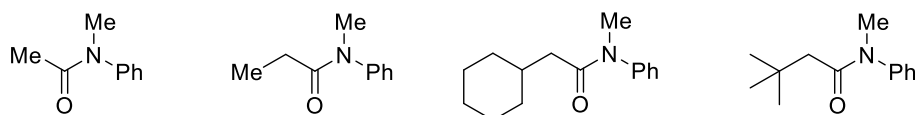

### 5.2 Scope of alcohols

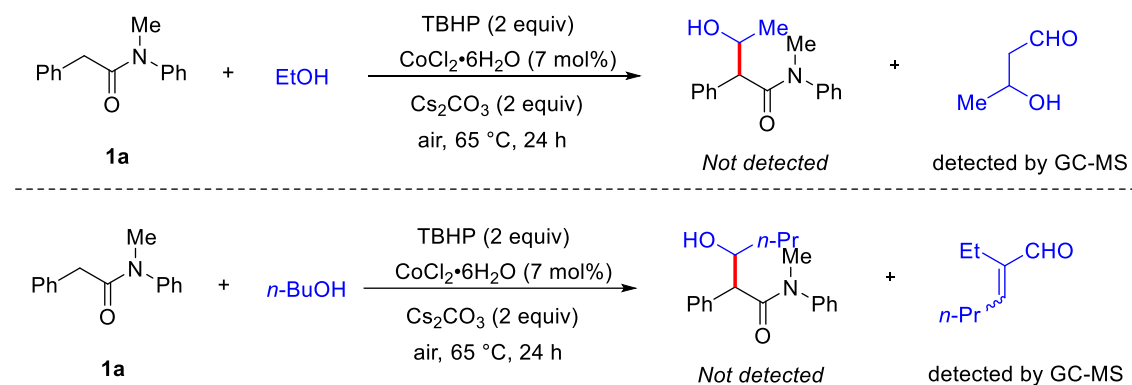

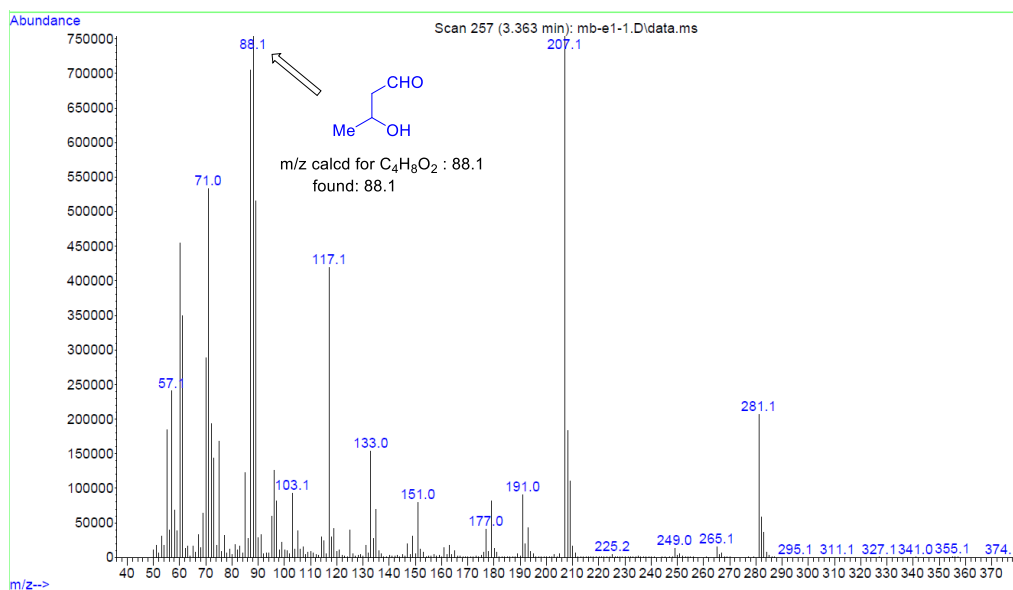

Figure S1

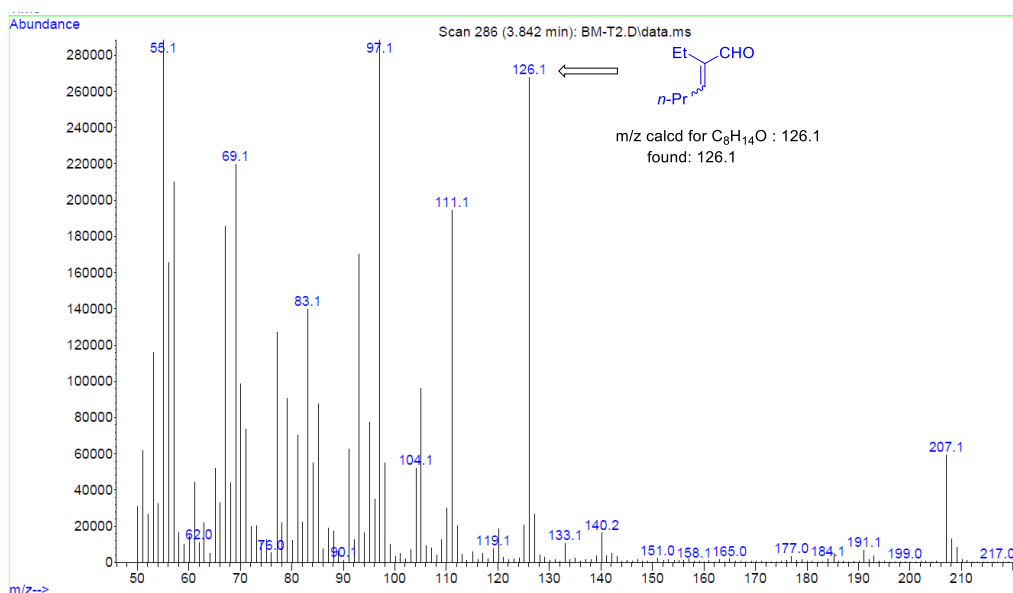

Figure S2

## 6. Mechanistic Studies

### 6.1 Kinetic isotopic effect experiments

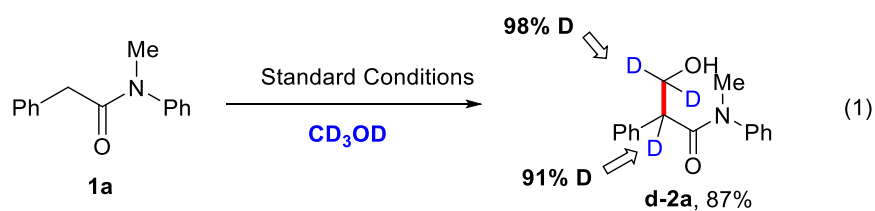

CoCl<sub>2</sub>·6H<sub>2</sub>O (2.5 mg, 0.0105 mmol, 7 mol%), Cs<sub>2</sub>CO<sub>3</sub> (97.7 mg, 0.30 mmol, 2 equiv), CD<sub>3</sub>OD (3.0 mL) and amide **1a** (23.5 μL, 0.15 mmol) were sequentially added into a 25 mL Schleck tube. Then TBHP (70 wt% in H<sub>2</sub>O) (41.2 μL, 0.3 mmol, 2 equiv) was added to the stirred reaction system. The reaction mixture was stirred at 65 °C for 24 h. The reaction solution was cooled at room temperature and quenched with saturated NH<sub>4</sub>Cl (2 mL), extracted with EtOAc (3×5 mL). The combined organic phase was dried over anhydrous Na<sub>2</sub>SO<sub>4</sub>, filtrated and concentrated under reduced pressure. The crude product was purified by column chromatography on silica gel (PE : EtOAc = 5:1) to afford the pure product d-**2a** (33.2 mg, 87%).

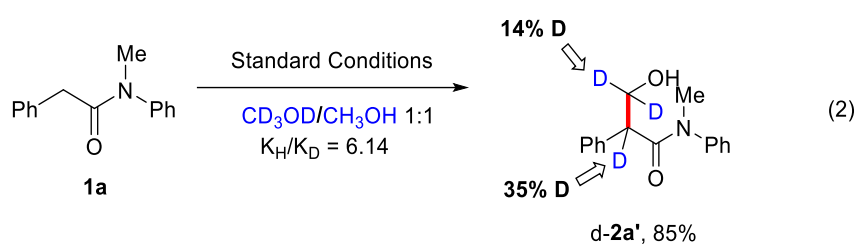

CoCl<sub>2</sub>·6H<sub>2</sub>O (2.5 mg, 0.0105 mmol, 7 mol%), Cs<sub>2</sub>CO<sub>3</sub> (97.7 mg, 0.30 mmol, 2 equiv), CD<sub>3</sub>OD (1.5 mL), CH<sub>3</sub>OH (1.5 mL) and amide **1a** (23.5 μL, 0.15 mmol) were sequentially added into a 25 mL Schleck tube. Then TBHP (70 wt% in H<sub>2</sub>O) (41.2 μL, 0.3 mmol, 2 equiv) was added to the stirred reaction system. The reaction mixture was stirred at 65 °C for 24 h. The reaction solution was cooled at room temperature and quenched with saturated NH<sub>4</sub>Cl (2 mL), extracted with EtOAc (3×5 mL). The combined organic phase was dried over anhydrous Na<sub>2</sub>SO<sub>4</sub>, filtrated and concentrated under reduced pressure. The crude product was purified by column chromatography on silica gel (PE : EtOAc = 5:1) to afford the pure product d-**2a'** (28.7 mg, 85%).

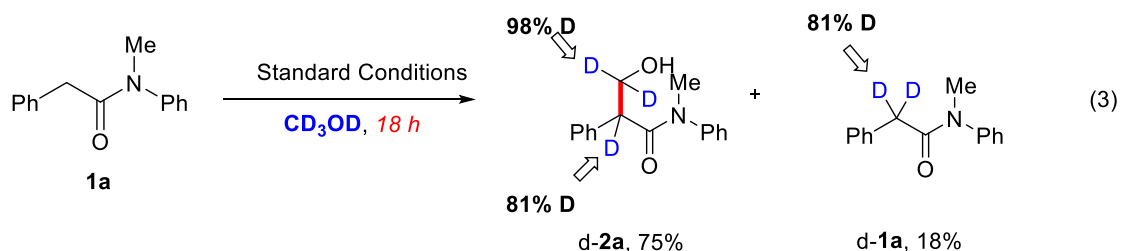

CoCl<sub>2</sub>·6H<sub>2</sub>O (2.5 mg, 0.0105 mmol, 7 mol%), Cs<sub>2</sub>CO<sub>3</sub> (97.7 mg, 0.30 mmol, 2 equiv), CD<sub>3</sub>OD (1.5 mL), and amide **1a** (23.5 μL, 0.15 mmol) were sequentially added into a 25 mL Schleck tube. Then TBHP (70 wt% in H<sub>2</sub>O) (41.2 μL, 0.3 mmol, 2 equiv) was added to the stirred reaction system. The reaction

mixture was stirred at 65 °C for 18 h. The reaction solution was cooled at room temperature and quenched with saturated NH<sub>4</sub>Cl (2 mL), extracted with EtOAc (3×5 mL). The combined organic phase was dried over anhydrous Na<sub>2</sub>SO<sub>4</sub>, filtrated and concentrated under reduced pressure. The crude product was purified by column chromatography on silica gel (PE : EtOAc = 5:1) to afford the pure product d-**2a** (28.6 mg, 75%), and d-**1a** (6.1 mg, 18%).

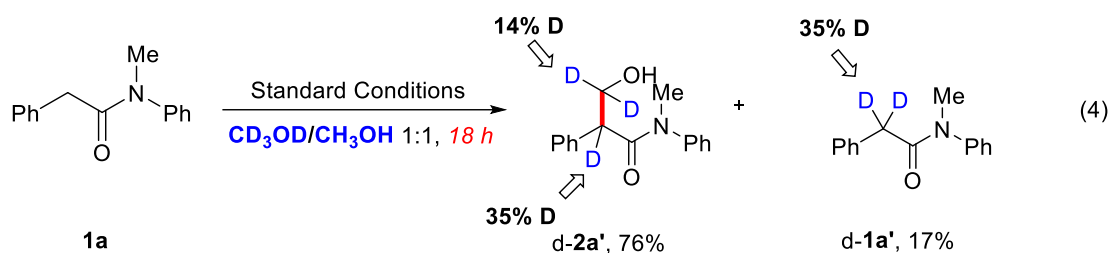

CoCl<sub>2</sub>·6H<sub>2</sub>O (2.5 mg, 0.0105 mmol, 7 mol%), Cs<sub>2</sub>CO<sub>3</sub> (97.7 mg, 0.30 mmol, 2 equiv), CD<sub>3</sub>OD/CH<sub>3</sub>OH 1:1 (3 mL), and amide **1a** (23.5 μL, 0.15 mmol) were sequentially added into a 25 mL Schleck tube. Then TBHP (70 wt% in H<sub>2</sub>O) (41.2 μL, 0.3 mmol, 2 equiv) was added to the stirred reaction system. The reaction mixture was stirred at 65 °C for 18 h. The reaction solution was cooled at room temperature and quenched with saturated NH<sub>4</sub>Cl (2 mL), extracted with EtOAc (3×5 mL). The combined organic phase was dried over anhydrous Na<sub>2</sub>SO<sub>4</sub>, filtrated and concentrated under reduced pressure. The crude product was purified by column chromatography on silica gel (PE : EtOAc = 5:1) to afford the pure product d-**2a'** (29.1 mg, 76%), and d-**1a** (5.7 mg, 17%).

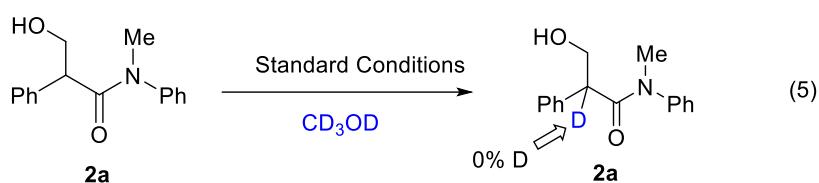

CoCl<sub>2</sub>·6H<sub>2</sub>O (2.5 mg, 0.0105 mmol, 7 mol%), Cs<sub>2</sub>CO<sub>3</sub> (97.7 mg, 0.30 mmol, 2 equiv), CD<sub>3</sub>OD (3.0 mL) and **2a** (38.3 mg, 0.15 mmol) were sequentially added into a 25 mL Schleck tube. Then TBHP (70 wt% in H<sub>2</sub>O) (41.2 μL, 0.3 mmol, 2 equiv) was added to the stirred reaction system. The reaction mixture was stirred at 65 °C for 24 h. The reaction solution was cooled at room temperature and quenched with saturated NH<sub>4</sub>Cl (2 mL), extracted with EtOAc (3×5 mL). The combined organic phase was dried over anhydrous Na<sub>2</sub>SO<sub>4</sub>, filtrated and concentrated under reduced pressure. The crude product was purified by column chromatography on silica gel (PE : EtOAc = 5:1) to afford the pure product.

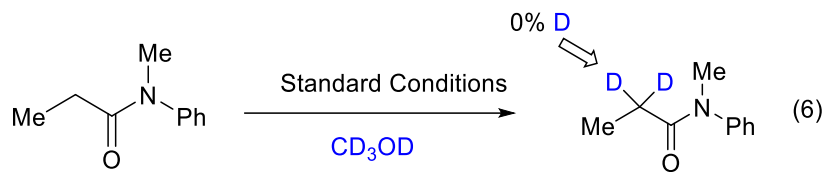

CoCl<sub>2</sub>·6H<sub>2</sub>O (2.5 mg, 0.0105 mmol, 7 mol%), Cs<sub>2</sub>CO<sub>3</sub> (97.7 mg, 0.30 mmol, 2 equiv), CD<sub>3</sub>OD (3.0 mL) and *N*-methyl-*N*-phenylpropionamide (24.5 mg, 0.15 mmol) were sequentially added into a 25 mL Schleck tube. Then TBHP (70 wt% in H<sub>2</sub>O) (41.2 μL, 0.3 mmol, 2 equiv) was added to the stirred reaction system. The reaction mixture was stirred at 65 °C for 24 h. The reaction solution was cooled at room temperature and quenched with saturated NH<sub>4</sub>Cl (2 mL), extracted with EtOAc (3×5 mL). The combined organic phase was dried over anhydrous Na<sub>2</sub>SO<sub>4</sub>, filtrated and concentrated under reduced pressure. The crude product was purified by column chromatography on silica gel (PE : EtOAc = 5:1) to afford the pure product.

## 6.2 Radical Inhibiting Experiment with TEMPO

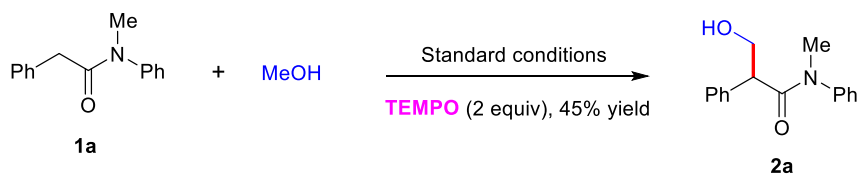

CoCl<sub>2</sub>·6H<sub>2</sub>O (5.0 mg, 0.021 mmol, 7 mol%), Cs<sub>2</sub>CO<sub>3</sub> (231.5 mg, 0.6 mmol), MeOH/Hexane 10:1 (3 mL), TEMPO (93.8 mg, 0.6 mmol, 2.0 equiv) and **1a** (67.5 mg, 0.3 mmol) were sequentially added into a 25 mL Schleck tube. Then TBHP (70 wt% in H<sub>2</sub>O) (83 μL, 0.6 mmol) was added to the stirred reaction system. The reaction mixture was stirred at 65 °C until the reaction was complete (monitored by TLC). The reaction solution was cooled at room temperature and quenched with NH<sub>4</sub>Cl (2 mL), extracted with ethyl acetate (3×5 mL). The combined organic phase was dried over anhydrous MgSO<sub>4</sub>, filtrated and concentrated under reduced pressure. The crude product was purified by column chromatography on silica gel (PE : EtOAc = 5:1-3:1) to afford the pure products **2a** (34.4 mg), 45% yield.

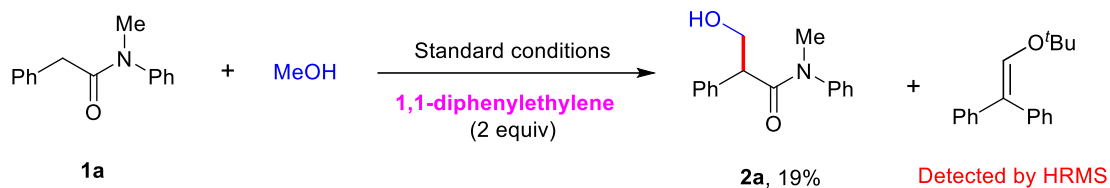

$\text{CoCl}_2 \cdot 6\text{H}_2\text{O}$  (5.0 mg, 0.021 mmol, 7 mol%),  $\text{Cs}_2\text{CO}_3$  (231.5 mg, 0.6 mmol), MeOH/Hexane 10:1 (3 mL), 1,1-diphenylethylene (108.2 mg, 0.6 mmol, 2.0 equiv) and **1a** (67.5 mg, 0.3 mmol) were sequentially added into a 25 mL Schleck tube. Then TBHP (70 wt% in  $\text{H}_2\text{O}$ ) (83  $\mu\text{L}$ , 0.6 mmol) was added to the stirred reaction system. The reaction mixture was stirred at 65 °C until the reaction was complete (monitored by TLC). Then, the reaction mixture was analyzed by HRMS, and the oxygen radical trapped by 1,1-diphenylethylene was detected (**Figure S1**, data of  $[\text{M}+\text{H}]^+$  are showed). In addition, after concentration under reduced pressure, **2a** was obtained in 19% yield by column chromatography isolation on silica gel (PE:EtOAc = 5:1).

MB-SUNRONGXIA-S621 #101-139 RT: 0.44978-0.61915 AV: 39 NL: 5.57E4  
 T: FTMS + p ESI SIM ms [250.7000-255.7000]

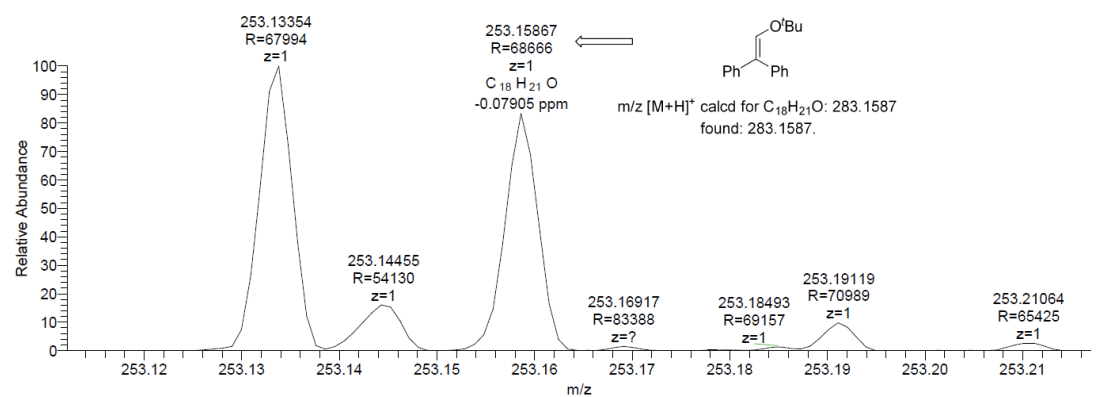

Figure S3

### 6.3 Procedure for control experiments

#### Using silver mirror reaction to detect the *in situ* formed formaldehyde:

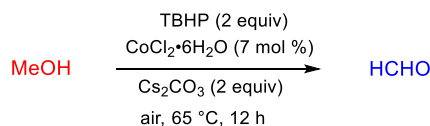

To a solution of  $\text{CoCl}_2 \cdot 6\text{H}_2\text{O}$  (5.0 mg, 0.005 mmol) and  $\text{Cs}_2\text{CO}_3$  (195.5 mg, 0.6 mmol) in MeOH (3 mL), TBHP (70 wt% in  $\text{H}_2\text{O}$ ) (83  $\mu\text{L}$ , 0.6 mmol) was added. After stirring for 30 min, a small amount of the

reaction mixture was dropped into the fresh silver ammonia solution in test tube. After shaking, the test tube was warmed in hot water and a layer of metallic silver was found adhering to the inner wall of the test tube. The picture of this phenomenon is shown in follow :

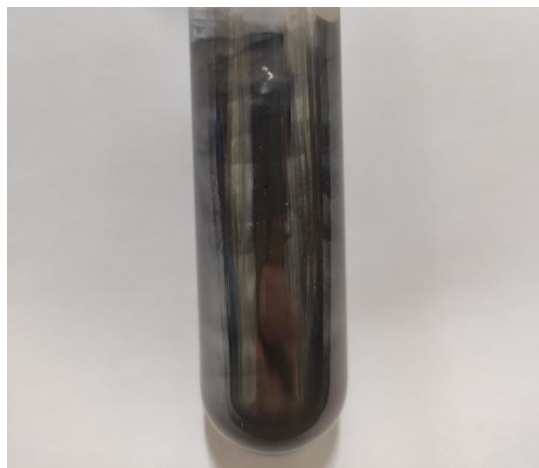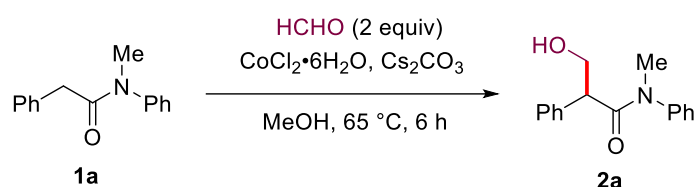

CoCl<sub>2</sub>·6H<sub>2</sub>O (2.5 mg, 0.0105 mmol, 7 mol%), Cs<sub>2</sub>CO<sub>3</sub> (97.7 mg, 0.30 mmol, 2 equiv), CH<sub>3</sub>OH (3 mL) and amide **1a** (23.5 μL, 0.15 mmol) were sequentially added into a 25 mL Schleck tube. Then HCHO (22.1 μL, 0.6 mmol, 2 equiv) was added to the stirred reaction system. The reaction mixture was stirred at 65 °C for 1 h. The reaction solution was cooled at room temperature and quenched with saturated NH<sub>4</sub>Cl (2 mL), extracted with EtOAc (3×5 mL). The combined organic phase was dried over anhydrous Na<sub>2</sub>SO<sub>4</sub>, filtrated and concentrated under reduced pressure. The crude product was purified by column chromatography on silica gel (PE : EtOAc = 5:1) to afford the pure product **2a** (32 mg, 84%).

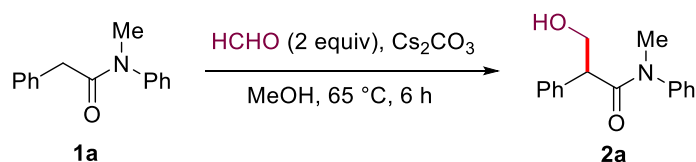

Cs<sub>2</sub>CO<sub>3</sub> (97.7 mg, 0.30 mmol, 2 equiv), CH<sub>3</sub>OH (3 mL) and amide **1a** (23.5 μL, 0.15 mmol) were sequentially added into a 25 mL Schleck tube. Then HCHO (22.1 μL, 0.6 mmol, 2 equiv) was added to



the stirred reaction system. The reaction mixture was stirred at 65 °C for 1 h. The reaction solution was cooled at room temperature and quenched with saturated NH<sub>4</sub>Cl (2 mL), extracted with EtOAc (3×5 mL). The combined organic phase was dried over anhydrous Na<sub>2</sub>SO<sub>4</sub>, filtrated and concentrated under reduced pressure. The crude product was purified by column chromatography on silica gel (PE : EtOAc = 5:1) to afford the pure product **2a** (29 mg, 77%).

## 7. Late-stage modification

### 7.1 Experimental procedure for synthesis of 5

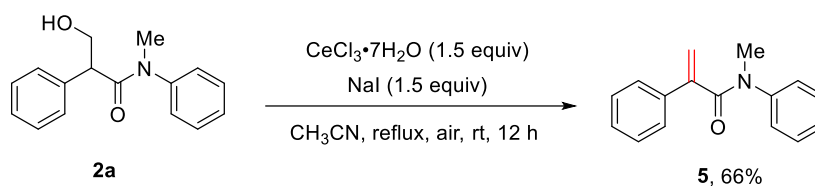

**2a** (76.5 mg, 0.3 mmol), cerium(III) chloride heptahydrate (167.7 mg, 1.5 equiv), sodium iodide (67.5 mg, 1.5 equiv) and acetonitrile (3 mL) were sequentially charged into a dry Schlenk tube. The reaction mixture was stirred at reflux temperature for 12 h. After cooled to room temperature, it was diluted with ether and treated with 0.5 mol/L HCl (10 mL). The organic layer was separated, and the aqueous layer was extracted with ether (3 × 20 mL). The combined organic layers were washed twice with an aqueous saturated NaHCO<sub>3</sub> solution and a saturated NaCl solution and dried over anhydrous Na<sub>2</sub>SO<sub>4</sub>, concentrated under reduced pressure. The residue was purified by column chromatography on silica gel (PE: EtOAc = 10:1) to afford the pure product. **N-methyl-N,2-diphenylacrylamide (5)**: 56 mg, 66% yield. colorless oil. <sup>1</sup>H NMR (400 MHz, CDCl<sub>3</sub>) δ 7.20 – 7.13 (m, 8H), 6.93 (s, 2H), 5.46 (s, 1H), 5.36 (s, 1H), 3.38 (s, 3H). <sup>13</sup>C NMR (151 MHz, CDCl<sub>3</sub>) δ 170.5, 145.7, 143.6, 136.8, 128.7, 127.2, 127.8, 126.9, 126.8, 126.0, 117.7, 37.3. HRMS (ESI): m/z [M+H]<sup>+</sup> calcd for C<sub>16</sub>H<sub>16</sub>NO<sup>+</sup>: found: 238.1227.

### 7.2 Experimental procedure for synthesis of 6

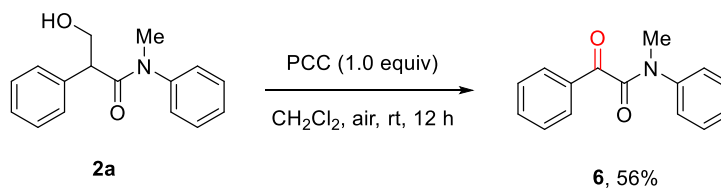

Pyridinium chlorochromate (129.3 mg, 0.6 mmol) and 1.0 g of silica gel were mixed in CH<sub>2</sub>Cl<sub>2</sub> (5 mL), 3-hydroxy-N-methyl-N,2-diphenylpropanamide (**2a**, 153.1 mg, 0.6 mmol) dissolved in 5 mL dichloromethane was added, the resultant mixture was stirred for 5 hours. Following this, the reaction was filtered through a silica plug and washed through with diethyl ether, and the solvent was removed to give the crude product. Purify the product by column chromatography chromatography (PE:EtOAc = 10:1). **N-methyl-2-oxo-N,2-diphenylacetamide (6)**: 134 mg, 56% yield. Yellow oil. <sup>1</sup>H NMR (400 MHz, CDCl<sub>3</sub>) δ 7.84 – 7.82 (m, 2H), 7.56 – 7.52 (m, 1H), 7.44 – 7.38 (m, 2H), 7.23 – 7.16 (m, 3H), 7.13 – 7.10 (m, 2H), 3.46 (s, 3H). <sup>13</sup>C NMR (151 MHz, CDCl<sub>3</sub>) δ 190.8, 167.1, 141.1, 134.3, 133.5, 129.5, 129.3, 128.8, 128.1, 126.7, 77.4, 77.1, 76.9, 36.2. HRMS (ESI): m/z [M+H]<sup>+</sup> calcd for C<sub>16</sub>H<sub>16</sub>NO<sup>+</sup>: 240.1019; found: 240.1012.

### 7.3 Experimental procedure for synthesis of **7**.<sup>4</sup>

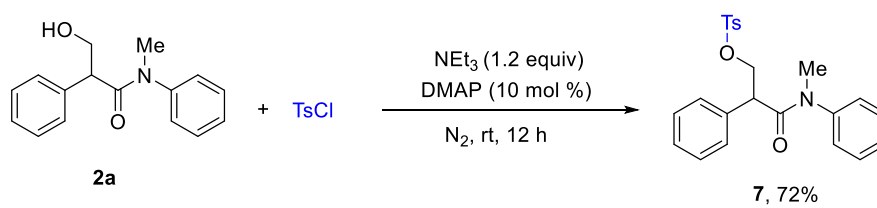

*p*-Toluenesulfonyl chloride (137.3 mg, 1.2 equiv) and **2a** (153.6 mg, 0.6 mmol) were mixed under an atmosphere of nitrogen, then CH<sub>2</sub>Cl<sub>2</sub> (5 ml) was added to the stirred system and cool the mixture to 0 °C. Add NEt<sub>3</sub> (1.4 equiv) dropwise over a period of 5 mins, warm the reaction mixture to room temperature and stir overnight. Add NaHCO<sub>3</sub> (10 mL/1M) and extract the solution with CH<sub>2</sub>Cl<sub>2</sub> (3×10 mL/1M). Wash the combined extracts with brine (10 mL/1M), dry over Na<sub>2</sub>SO<sub>4</sub> and concentrate in vacuo. Purify the residue by flash column chromatography (PE:EtOAc = 10:1). **3-(methyl(phenyl)amino)-3-oxo-2-phenylpropyl 4-methylbenzenesulfonate (7)**: 177 mg, 72% yield. Colorless oil. <sup>1</sup>H NMR (400 MHz, CDCl<sub>3</sub>) δ 7.68 – 7.65 (m, 2H), 7.35 – 7.27 (s, 5H), 7.23 – 7.14 (m, 3H), 6.94 – 6.88 (m, 4H), 4.56 (t, *J* = 9.2 Hz, 1H), 4.03 (dd, *J* = 9.4, 5.8 Hz, 1H), 3.89 (dd, *J* = 9.2, 5.6 Hz, 1H), 3.21 (s, 3H), 2.42 (s, 3H). <sup>13</sup>C NMR (151 MHz, CDCl<sub>3</sub>) δ 169.6, 143.7 (d, *J* = 279.0 Hz), 133.7 (d, *J* = 306.0 Hz), 129.7, 129.6, 128.6, 128.2 (d, *J* = 4.5 Hz), 127.9 (d, *J* = 7.5 Hz), 127.8, 71.7, 48.5, 37.6, 21.6. HRMS (ESI): m/z [M+H]<sup>+</sup> calcd for C<sub>16</sub>H<sub>16</sub>NO<sup>+</sup>: 410.1421; found: 410.1415.

## 8. Crystallographic Structure Determination (4a)

The colorless single crystal of product **4a** was obtained by recrystallization using a CHCl<sub>3</sub>/acetone solvent system at room temperature. The X-ray single-crystal diffraction was performed on an Agilent SuperNOVA instrument (**Figure S4**).

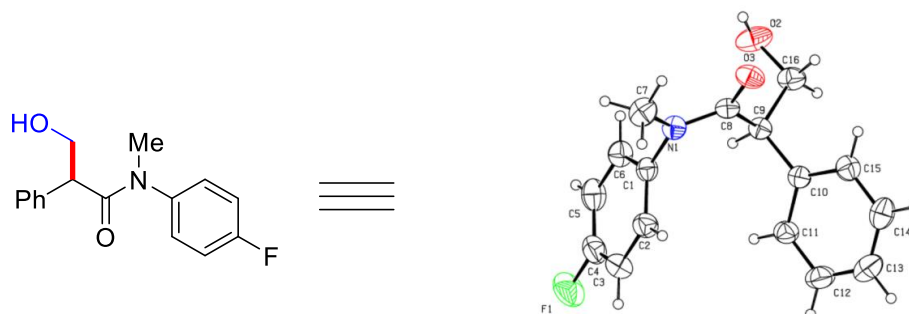

**Figure S4.** Thermal ellipsoid plot of compound **4a** at the 30% probability level; hydrogen atoms are drawn as spheres of arbitrary radius.

**Table 1** Crystal data and structure refinement for sunrongxia\_0428-1\_auto

|                                       |                                                  |
|---------------------------------------|--------------------------------------------------|
| Identification code                   | sunrongxia_0428-1_auto                           |
| Empirical formula                     | C <sub>16</sub> H <sub>16</sub> FNO <sub>2</sub> |
| Formula weight                        | 273.30                                           |
| Temperature/K                         | 302.01(10)                                       |
| Crystal system                        | monoclinic                                       |
| Space group                           | C2/c                                             |
| a/Å                                   | 18.0338(3)                                       |
| b/Å                                   | 11.15970(19)                                     |
| c/Å                                   | 14.0652(3)                                       |
| α/°                                   | 90                                               |
| β/°                                   | 97.5402(18)                                      |
| γ/°                                   | 90                                               |
| Volume/Å <sup>3</sup>                 | 2806.18(9)                                       |
| Z                                     | 8                                                |
| ρ <sub>calc</sub> /mg/mm <sup>3</sup> | 1.294                                            |

|                                                |                                                             |
|------------------------------------------------|-------------------------------------------------------------|
| $\mu/\text{mm}^{-1}$                           | 0.778                                                       |
| F(000)                                         | 1152.0                                                      |
| Crystal size/ $\text{mm}^3$                    | $0.13 \times 0.11 \times 0.07$                              |
| 2 $\theta$ range for data collection           | 9.342 to 151.388°                                           |
| Index ranges                                   | $-22 \leq h \leq 22, -5 \leq k \leq 13, -17 \leq l \leq 17$ |
| Reflections collected                          | 9716                                                        |
| Independent reflections                        | 2801[R(int) = 0.0232]                                       |
| Data/restraints/parameters                     | 2801/0/184                                                  |
| Goodness-of-fit on $F^2$                       | 1.035                                                       |
| Final R indexes [ $I \geq 2\sigma(I)$ ]        | $R_1 = 0.0416, wR_2 = 0.1168$                               |
| Final R indexes [all data]                     | $R_1 = 0.0443, wR_2 = 0.1195$                               |
| Largest diff. peak/hole / $e \text{ \AA}^{-3}$ | 0.23/-0.21                                                  |

**Table 2. Fractional Atomic Coordinates ( $\times 10^4$ ) and Equivalent Isotropic Displacement Parameters ( $\text{\AA}^2 \times 10^3$ ) for sunrongxia\_0428-1\_auto. Ueq is defined as 1/3 of of the trace of the orthogonalised UIJ tensor.**

| Atom | x          | y          | z          | U(eq)    |
|------|------------|------------|------------|----------|
| F1   | 8637.8(6)  | 3596.8(12) | 5480.2(11) | 107.9(5) |
| O2   | 6239.2 (7) | 7758.9(13) | 2415.7(7)  | 80.5(4)  |
| O3   | 4929.7(5)  | 6495.0(10) | 3609.1(7)  | 60.9(3)  |
| N1   | 5804.6(5)  | 5082.7(9)  | 3973.7(8)  | 49.9(3)  |
| C1   | 6547.0(7)  | 4706.6(11) | 4357.9(9)  | 48.1(3)  |
| C2   | 6688.1(9)  | 4374.0(13) | 5309.6(10) | 61.5(4)  |
| C3   | 7397.3(10) | 3999.7(16) | 5692.0(13) | 74.3(5)  |
| C4   | 7941.7(9)  | 3958.4(14) | 5107.7(14) | 70.0(4)  |
| C5   | 7817.9(9)  | 4248.6(15) | 4161.2(14) | 71.5(4)  |
| C6   | 7104.3(8)  | 4626.1(13) | 3777.3(11) | 59.2(3)  |
| C7   | 5245.6(9)  | 4122.4(15) | 3827.1(13) | 68.9(4)  |
| C8   | 5587.9(6)  | 6232.6(11) | 3857.5(8)  | 45.0(3)  |
| C9   | 6177.9(6)  | 7214.8(11) | 4077.2(9)  | 45.9(3)  |

|     |            |            |            |         |
|-----|------------|------------|------------|---------|
| C10 | 6140.3(6)  | 7699.3(11) | 5078.9(9)  | 46.3(3) |
| C11 | 6695.9(8)  | 7403.3(13) | 5820.6(10) | 56.6(3) |
| C12 | 6662.8(11) | 7798.6(16) | 6746.5(11) | 73.7(5) |
| C13 | 6076.5(11) | 8505.7(17) | 6942.8(12) | 78.2(5) |
| C14 | 5524.5(10) | 8815.4(15) | 6213.1(13) | 72.9(4) |
| C15 | 5552.4(8)  | 8414.1(13) | 5289.5(11) | 58.1(3) |
| C16 | 6071.5(9)  | 8183.9(14) | 3304.6(10) | 61.0(4) |

**Table 3. Anisotropic Displacement Parameters ( $\text{\AA}^2 \times 10^3$ ) for sunrongxia\_0428-1\_auto. The**

**Anisotropic displacement factor exponent takes the form:  $-\pi^2[h^2a^2U_{11}+2hka^*b^*U_{12}+\dots]$ .**

| Atom | $U_{11}$ | $U_{22}$  | $U_{33}$  | $U_{23}$ | $U_{13}$ | $U_{12}$ |
|------|----------|-----------|-----------|----------|----------|----------|
| F1   | 67.4(6)  | 102.0(8)  | 146.4(12) | 2.8(7)   | -16.1(7) | 27.0(6)  |
| O2   | 79.3(7)  | 112.9(10) | 49.6(6)   | 3.1(5)   | 9.7(5)   | -41.5(7) |
| O3   | 40.9(5)  | 72.6(6)   | 66.2(6)   | 12.2(5)  | -4.4(4)  | -3.9(4)  |
| N1   | 44.0(5)  | 49.8(6)   | 55.6(6)   | -0.3(4)  | 5.7(4)   | -9.7(4)  |
| C1   | 47.7(6)  | 42.1(6)   | 54.7(7)   | -1.5(5)  | 7.5(5)   | -3.0(5)  |
| C2   | 65.8(8)  | 63.3(8)   | 56.4(8)   | 5.7(6)   | 12.0(6)  | 5.8(6)   |
| C3   | 80.7(11) | 70.6(10)  | 67.4(9)   | 8.4(7)   | -5.2(8)  | 13.9(8)  |
| C4   | 58.7(8)  | 54.8(8)   | 92.7(12)  | -1.4(7)  | -4.3(8)  | 8.5(6)   |
| C5   | 55.6(8)  | 63.8(9)   | 99.0(12)  | -5.8(8)  | 24.8(8)  | 3.7(7)   |
| C6   | 59.4(8)  | 58.9(8)   | 61.4(8)   | 0.2(6)   | 15.7(6)  | -0.8(6)  |
| C7   | 62.5(8)  | 64.2(9)   | 79.7(10)  | -6.0(7)  | 8.2(7)   | -24.4(7) |
| C8   | 40.8(6)  | 54.7(7)   | 39.0(6)   | 4.0(5)   | 3.6(4)   | -5.7(5)  |
| C9   | 39.7(6)  | 48.7(6)   | 49.0(6)   | 2.7(5)   | 4.1(5)   | -4.6(5)  |
| C10  | 45.0(6)  | 44.3(6)   | 48.8(6)   | 3.1(5)   | 3.8(5)   | -7.3(5)  |
| C11  | 56.5(7)  | 54.6(7)   | 55.5(7)   | 1.3(6)   | -4.5(6)  | -4.8(6)  |
| C12  | 89.9(11) | 73.0(10)  | 52.9(8)   | 0.2(7)   | -10.5(7) | -13.5(8) |
| C13  | 99.1(13) | 80.4(11)  | 56.5(9)   | -12.7(7) | 15.3(8)  | -20.6(9) |
| C14  | 73.5(10) | 67.2(9)   | 82.8(11)  | -14.2(8) | 28.5(8)  | -6.3(7)  |
| C15  | 52.1(7)  | 58.1(8)   | 64.1(8)   | 0.8(6)   | 7.3(6)   | 0.0(6)   |

| Atom | U <sub>11</sub> | U <sub>22</sub> | U <sub>33</sub> | U <sub>23</sub> | U <sub>13</sub> | U <sub>12</sub> |
|------|-----------------|-----------------|-----------------|-----------------|-----------------|-----------------|
| C16  | 67.5(8)         | 61.6(8)         | 52.2(7)         | 10.1(6)         | 1.2(6)          | -18.0(6)        |

**Table 4 Bond Lengths for sunrongxia\_0428-1\_auto.**

| Atom | Atom | Length/Å   | Atom | Atom | Length/Å   |
|------|------|------------|------|------|------------|
| F1   | C4   | 1.3568(18) | C5   | C6   | 1.394(2)   |
| O2   | C16  | 1.407(2)   | C8   | C9   | 1.5306(16) |
| O3   | C8   | 1.2279(15) | C9   | C10  | 1.5189(17) |
| N1   | C1   | 1.4391(16) | C9   | C16  | 1.5273(18) |
| N1   | C7   | 1.4672(16) | C10  | C11  | 1.3883(18) |
| N1   | C8   | 1.3451(17) | C10  | C15  | 1.3894(19) |
| C1   | C2   | 1.3803(19) | C11  | C12  | 1.384(2)   |
| C1   | C6   | 1.3785(19) | C12  | C13  | 1.376(3)   |
| C2   | C3   | 1.385(2)   | C17  | C18  | 1.377(3)   |
| C3   | C4   | 1.361(3)   | C13  | C14  | 1.381(2)   |
| C4   | C5   | 1.360(3)   |      |      |            |

**Table 5 Bond Angles for sunrongxia\_0428-1\_auto.**

| Atom | Atom | Atom | Angle/°     | Atom | Atom | Atom | Angle/°    |
|------|------|------|-------------|------|------|------|------------|
| C1   | N1   | C7   | 115.34(11)  | O3   | C8   | C9   | 120.47(11) |
| C8   | N1   | C1   | 124.40(10)  | N1   | C8   | C9   | 118.39(19) |
| C8   | N1   | C7   | 119.77(11)  | C10  | C9   | C8   | 109.13(11) |
| C2   | C1   | N1   | 119.12(12)  | C10  | C9   | C16  | 113.03(10) |
| C6   | C1   | N1   | 120.075(12) | C16  | C9   | C8   | 110.14(11) |
| C6   | C1   | C2   | 120.07(13)  | C11  | C10  | C9   | 119.78(12) |
| C1   | C2   | C3   | 120.06(14)  | C11  | C10  | C15  | 118.17(13) |
| C4   | C3   | C2   | 118.56(15)  | C15  | C10  | C9   | 122.03(11) |
| F1   | C4   | C3   | 118.75(17)  | C12  | C11  | C10  | 121.02(15) |
| F1   | C4   | C5   | 118.27(16)  | C13  | C12  | C11  | 120.06(15) |
| C5   | C4   | C3   | 122.97(15)  | C12  | C13  | C14  | 119.59(15) |
| C4   | C5   | C6   | 118.42(15)  | C13  | C14  | C15  | 120.51(16) |

|    |    |    |            |     |     |     |            |
|----|----|----|------------|-----|-----|-----|------------|
| C1 | C6 | C5 | 119.87(14) | C14 | C15 | C10 | 110.64(14) |
| O3 | C8 | N1 | 121.11(11) | O2  | C16 | C9  | 111.84(13) |

**Table 6 Hydrogen Atom Coordinates ( $\text{\AA}\times 10^4$ ) and Isotropic Displacement Parameters ( $\text{\AA}^2\times 10^3$ ) for sunrongxia\_0428-1\_auto.**

| Atom | x       | y       | z       | U(eq) |
|------|---------|---------|---------|-------|
| H2   | 5871.83 | 7418.54 | 2132.73 | 121   |
| H3   | 6306.69 | 4401.26 | 5694.59 | 74    |
| H4   | 7499.31 | 3781.35 | 6333.91 | 89    |
| H5   | 8200.23 | 4196.35 | 3779.13 | 86    |
| H6   | 7004.32 | 4823.27 | 3130.73 | 71    |
| H7   | 5156.75 | 3808.22 | 4437.48 | 103   |
| H8   | 5426.79 | 3494.29 | 3452.17 | 103   |
| H9   | 4787.36 | 4436.45 | 3495.91 | 103   |
| H10  | 6671.98 | 6852.91 | 4067.28 | 55    |
| H11  | 7096.67 | 6932.12 | 5693.22 | 68    |
| H12  | 7037.15 | 7586.17 | 7236.57 | 88    |
| H13  | 6053.23 | 8772.75 | 7564.49 | 94    |
| H14  | 5129.74 | 9298.41 | 6343.12 | 87    |
| H15  | 5174.01 | 8624.52 | 4803.84 | 70    |
| H16  | 5557.59 | 8462.13 | 3233.06 | 73    |
| H17  | 6392.96 | 8859.52 | 3504.5  | 73    |

## 9. Reference

- [1] C. Jin, J. Du, C. Zeng, X. Zhao, Y. Cao, X. Zhang, X. Lu, C. Fan, *Adv. Synth. Catal.* 2014, **356**, 2437.
- [2] T. Slagbrand, G. Kervefors, F. Tinnis, H. Adolfsson, *Adv. Synth. Catal.* 2017, **359**, 1990.
- [3] H. Yang, P. G. Dormer, N. R. Rivera, A. J. Hoover, *Angew. Chem., Int. Ed.* 2018, **57**, 1883.
- [4] M. H. Shaw, N. G. McCreanor, W. G. Whittingham, J. F. Bower, *J. Am. Chem. Soc.* 2014, **137**, 463.

## 10. Cope of NMR Spectra

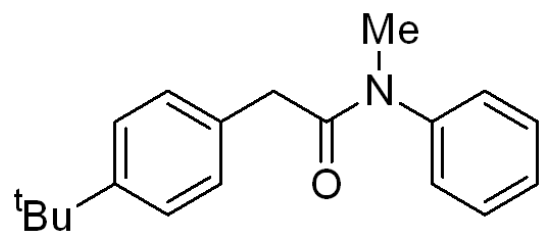

1h

7.408  
7.391  
7.372  
7.352  
7.335  
7.261  
7.241  
7.145  
7.127  
7.012  
6.993

~3.423  
~3.268

—1.283

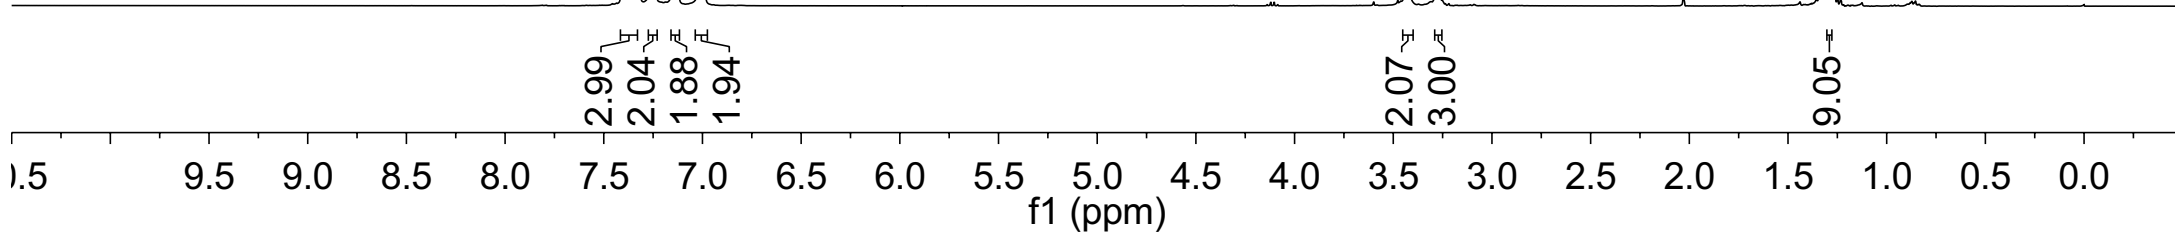



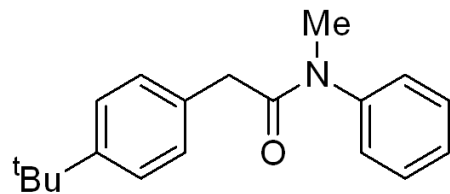

1h

—170.64

—148.72

—143.56

131.94

129.20

128.29

127.40

127.11

124.71

77.21

77.00

76.79

39.78

37.07

33.87

30.94

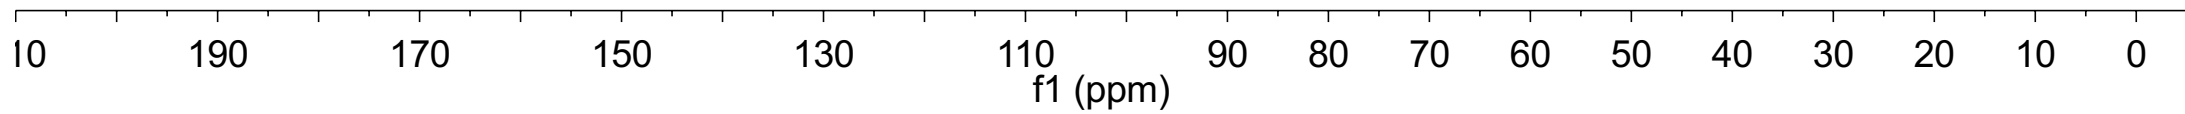

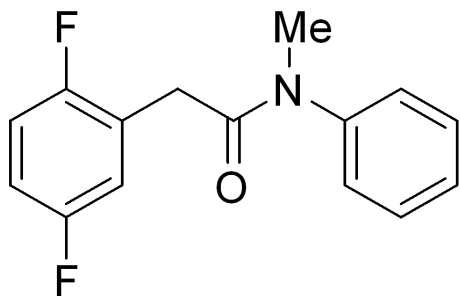

1o

7.353  
7.335  
7.317  
7.283  
7.266  
7.260  
7.142  
7.124  
6.874  
6.830  
6.807  
6.796  
6.785  
6.775  
6.767  
6.757

3.351  
3.212

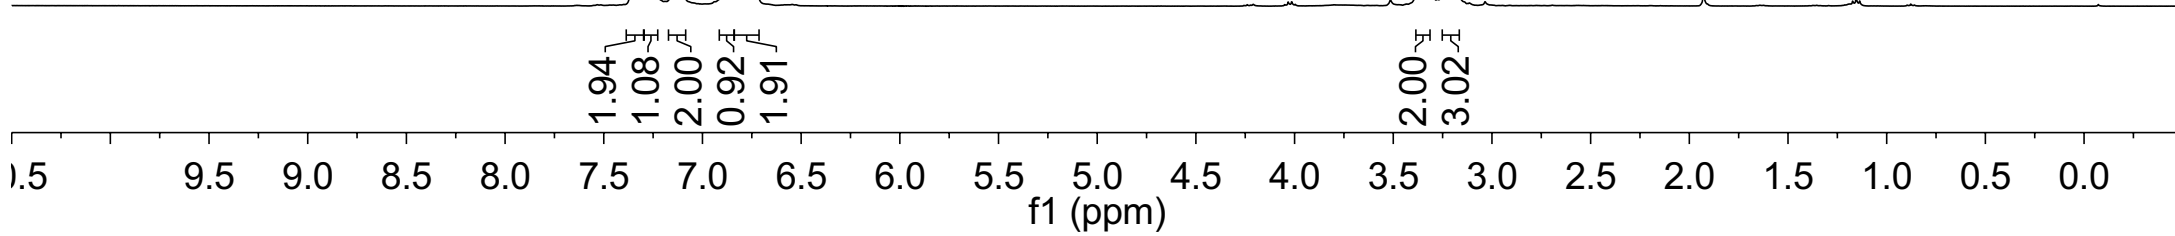

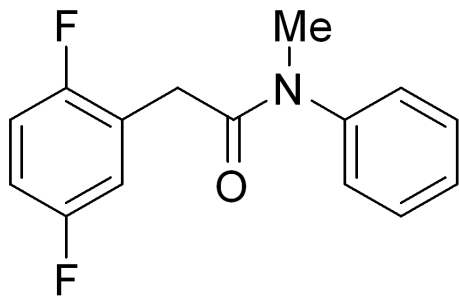

1o

168.835  
158.771  
157.240  
157.223  
155.639  
153.623  
143.263

129.510  
127.704  
126.912  
117.588  
117.558  
117.426  
117.397  
115.609  
115.551  
115.442  
115.384  
114.267  
114.211  
77.214  
77.000  
76.786

37.099  
33.751

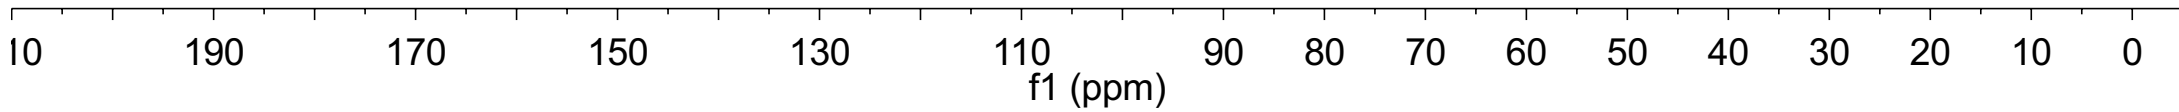

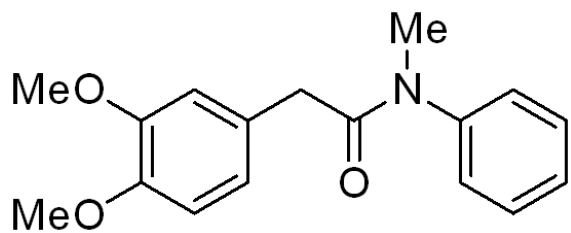

1p

7.326  
7.307  
7.292  
7.274  
7.260  
7.059  
7.043  
6.777  
6.756  
6.741  
6.722  
6.652  
6.632  
6.530  
6.468  
6.449

3.748  
3.718  
3.344  
3.192

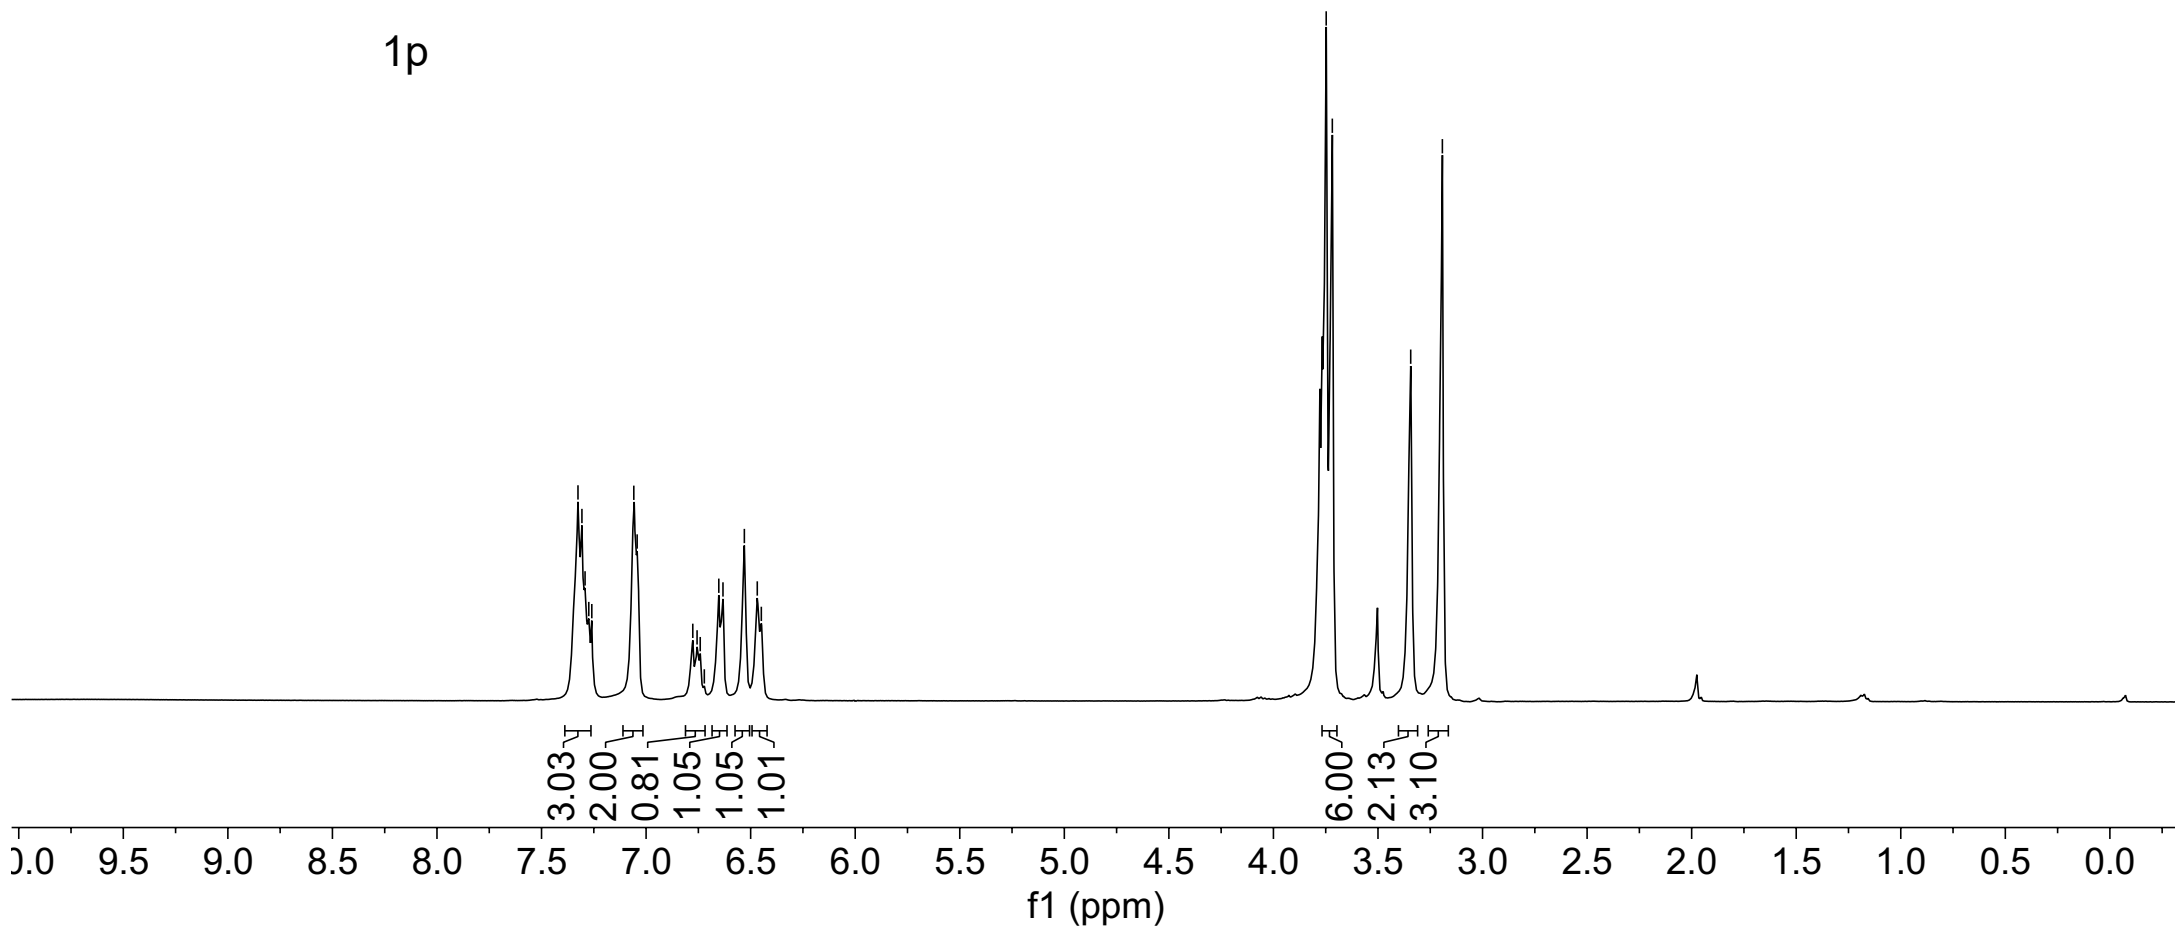

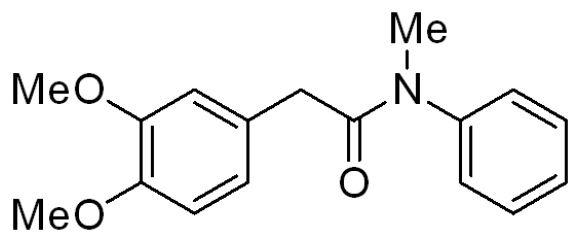

1p

170.90

148.38

147.44

143.68

129.35

127.61

127.59

127.38

120.77

112.07

110.79

77.21

77.00

76.79

55.57

55.44

40.20

37.30

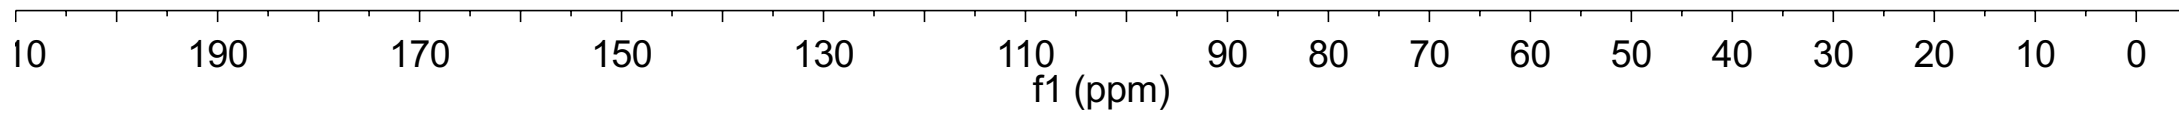

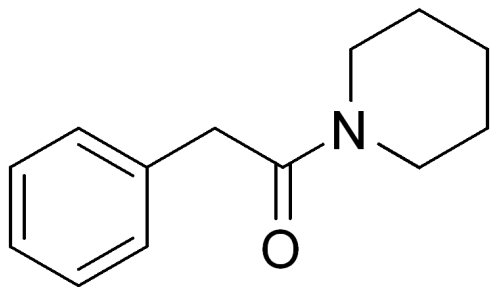

3n

7.293  
7.276  
7.250  
7.231  
7.210

3.712  
3.553  
3.347  
3.338

1.542  
1.492  
1.322

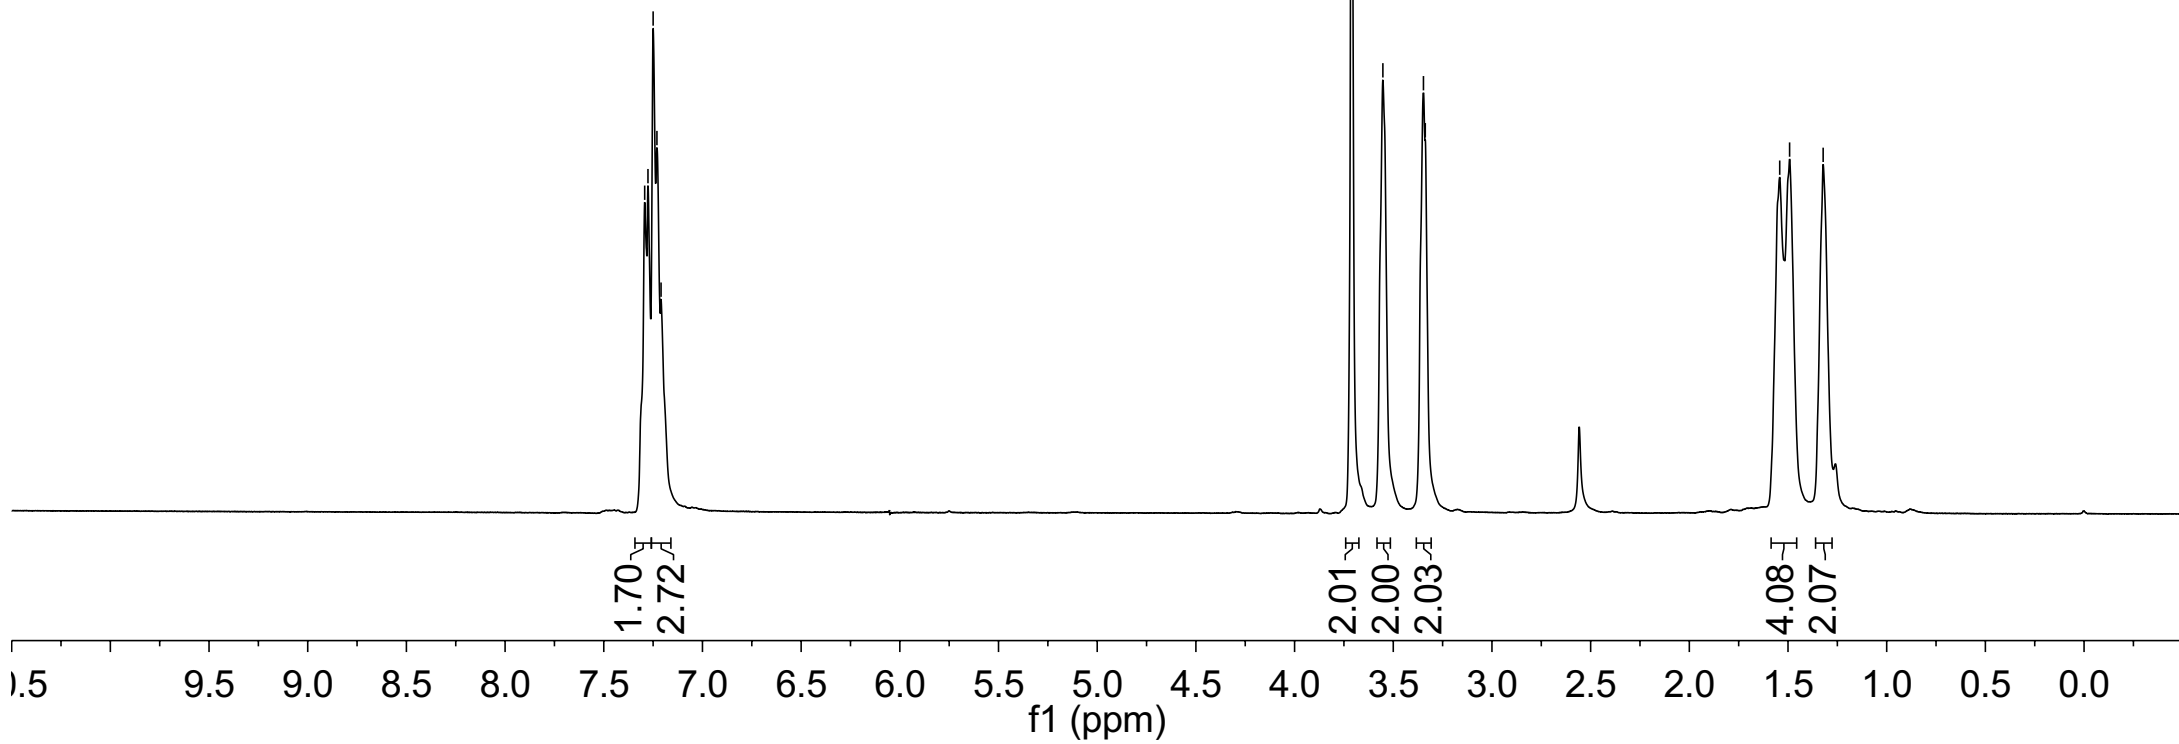

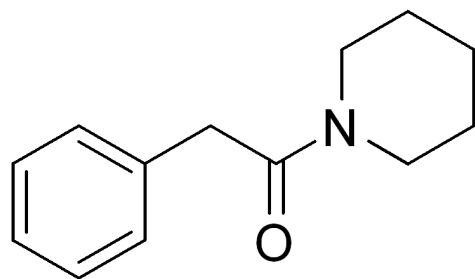

3n

168.87

135.09

128.27

128.23

126.26

77.21

77.00

76.79

46.90

42.51

40.78

25.82

25.15

24.07



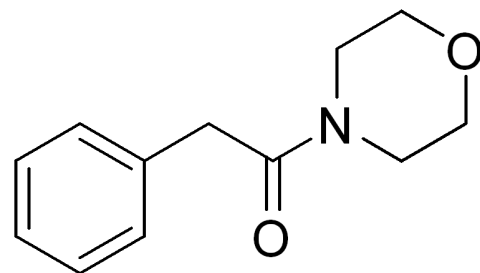

3o

7.260  
7.254  
7.244  
7.241  
7.224  
7.207  
7.157  
7.145  
7.140

3.626  
3.522  
3.353  
3.325

1.88  
2.69

2.00  
3.97  
4.01

1.5 9.5 9.0 8.5 8.0 7.5 7.0 6.5 6.0 5.5 5.0 4.5 4.0 3.5 3.0 2.5 2.0 1.5 1.0 0.5 0.0  
f1 (ppm)



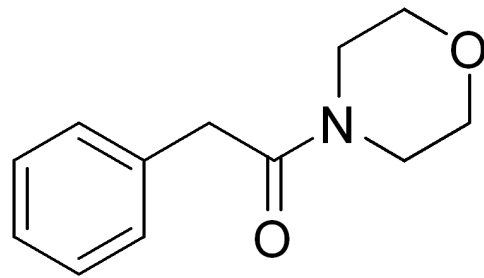

30

169.143  
169.133

134.468  
128.319  
128.309  
128.147  
126.419  
126.411

77.214  
77.000  
76.787  
66.271  
65.978

46.048  
41.686  
40.277

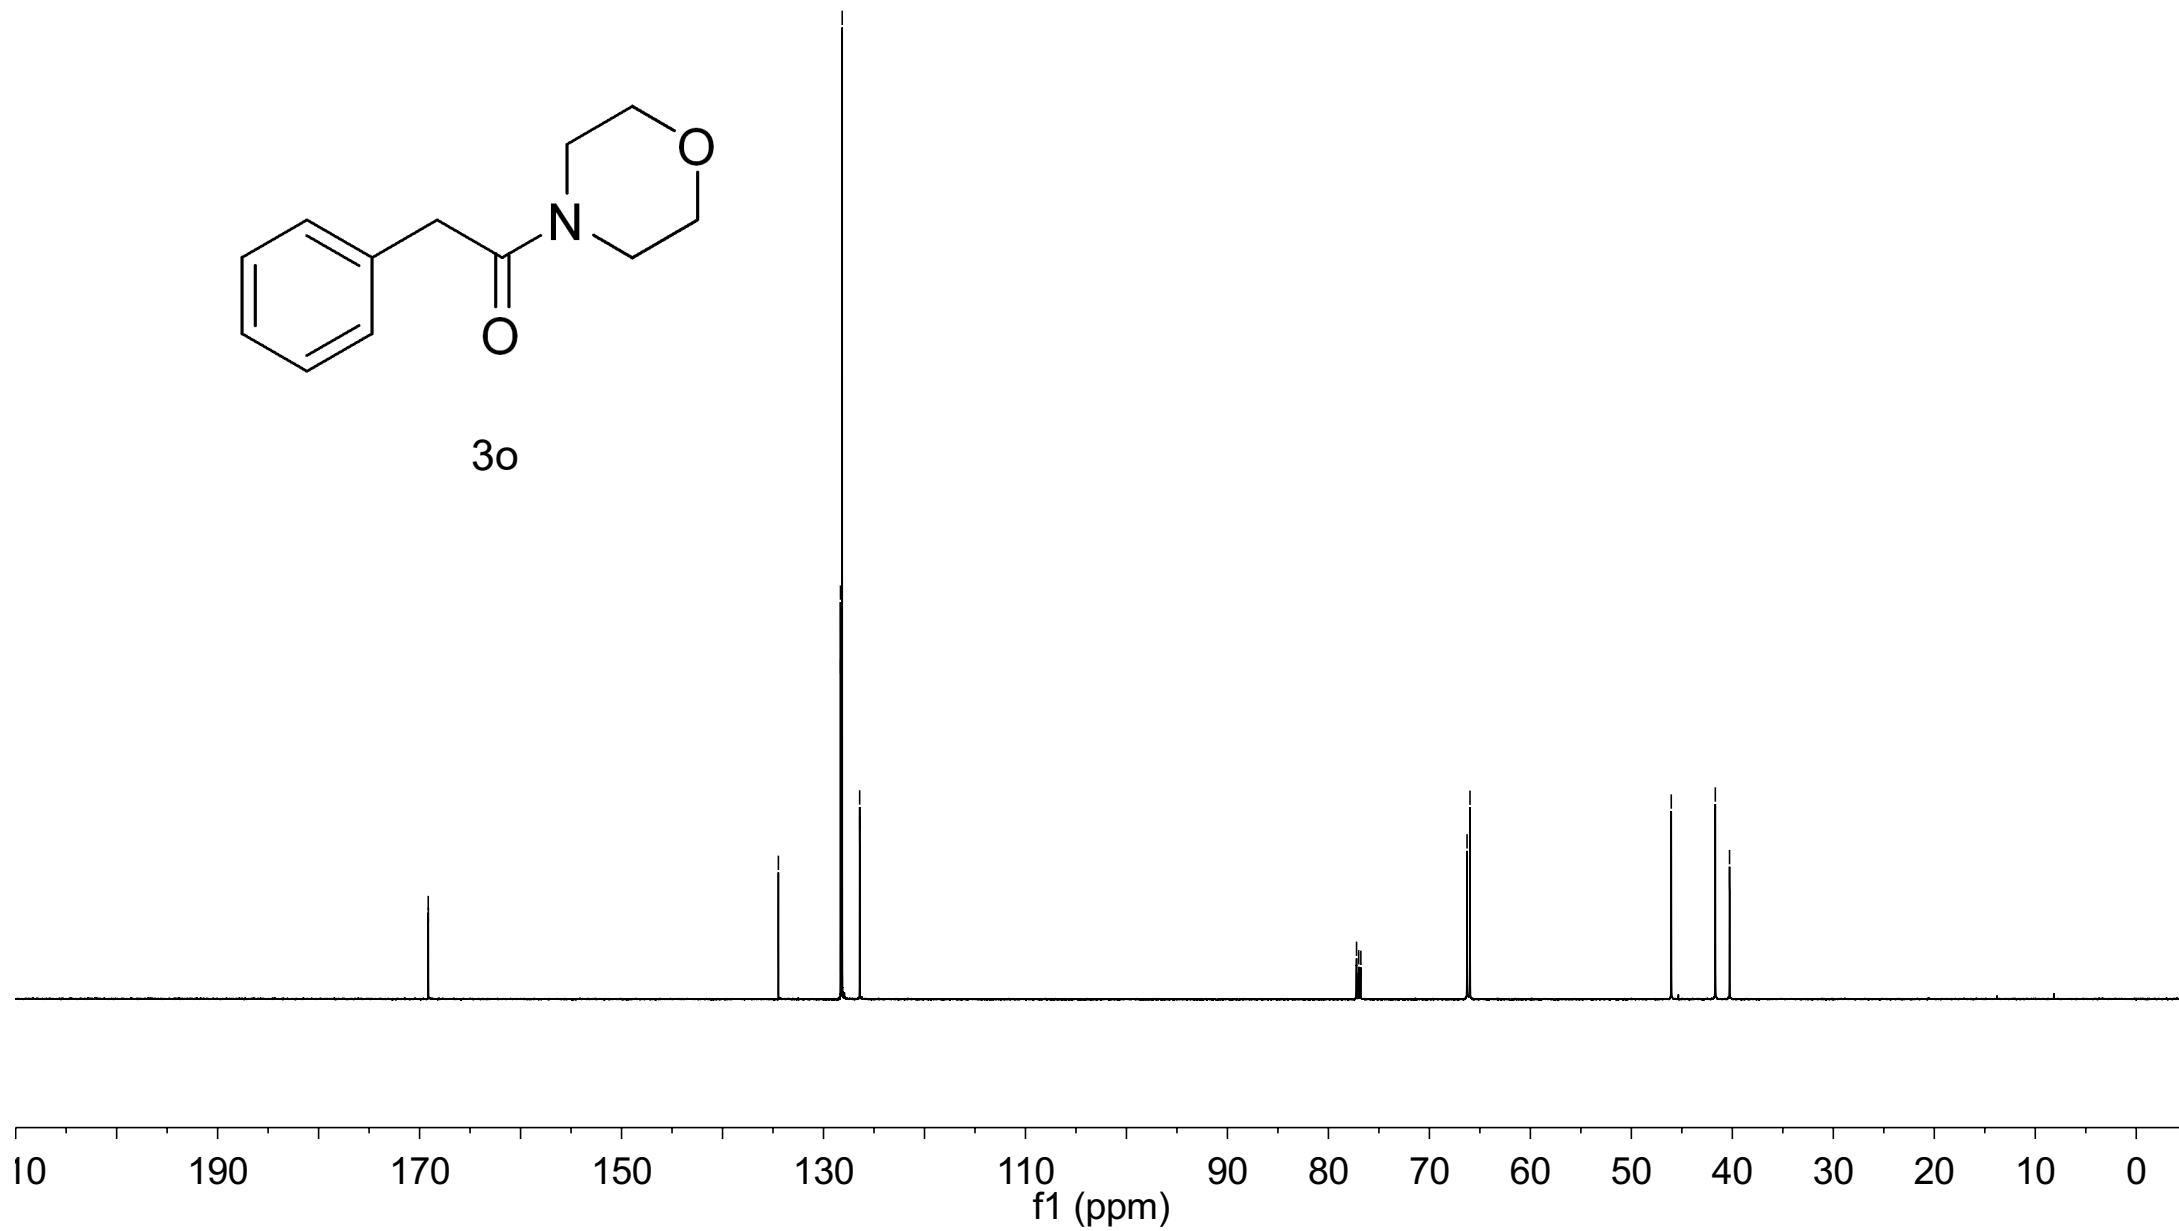

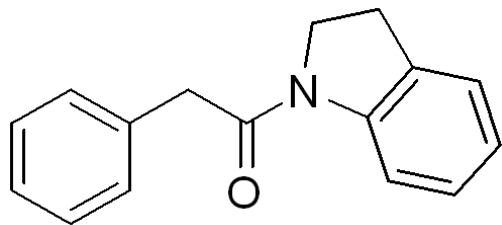

3p

8.285  
8.265  
7.353  
7.350  
7.348  
7.333  
7.328  
7.313  
7.293  
7.289  
7.272  
7.263  
7.260  
7.197  
7.176  
7.157  
7.036  
4.885  
4.885  
4.064  
4.042  
3.814  
3.179  
3.158  
3.137

0.83  
5.10  
2.03  
0.99  
2.07  
2.00  
2.02

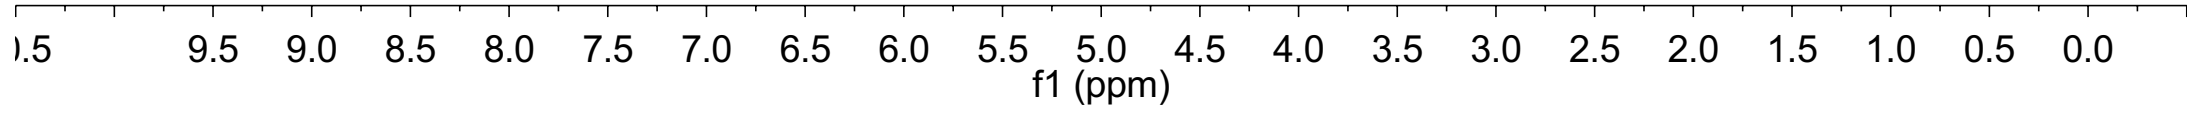

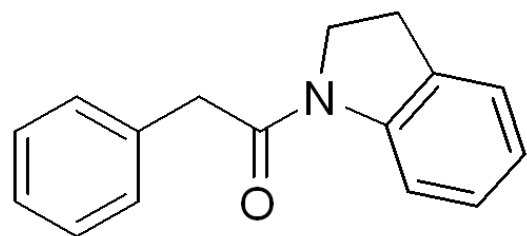

3p

—169.04

—143.02

—134.19

—131.03

—129.03

—128.69

—127.51

—126.94

—124.45

—123.72

—117.14

—77.21

—77.00

—76.79

—48.14

—43.53

—28.03



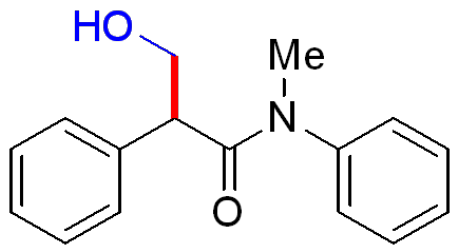

2a

7.276  
7.260  
7.237  
7.186  
7.180  
7.173  
7.171  
7.164  
7.149  
6.925  
6.920  
6.912  
6.902

4.101  
4.078  
4.053  
3.781  
3.769  
3.759  
3.748  
3.665  
3.641  
3.261  
3.106

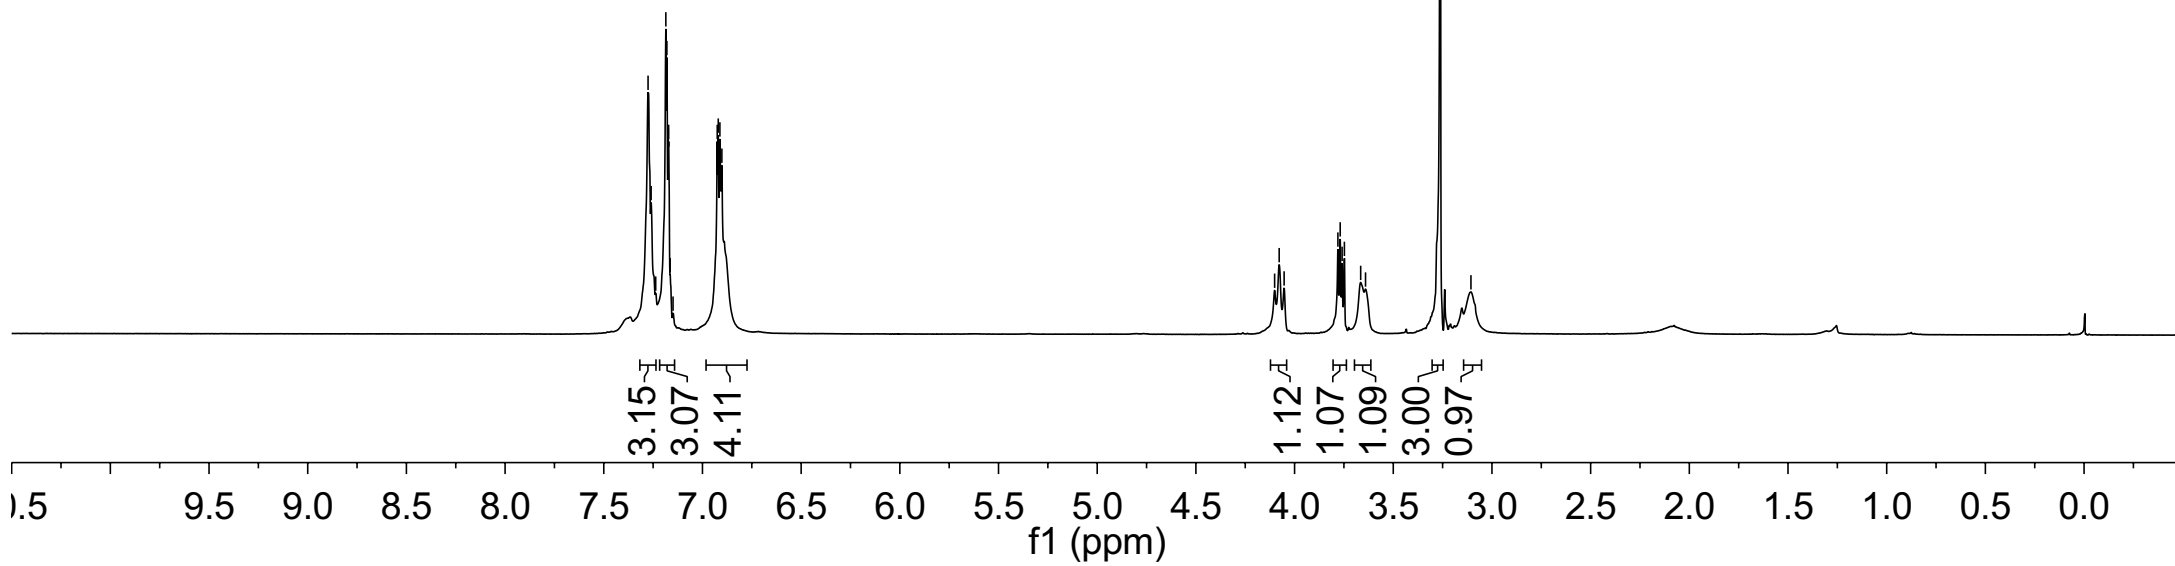

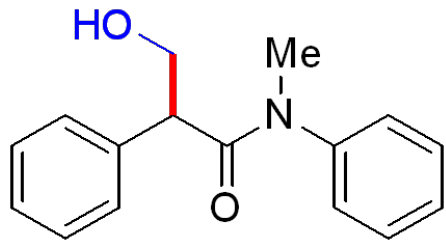

2a

—172.51

142.81

136.48

129.27

129.03

128.31

128.02

127.78

127.00

77.32

77.00

76.68

—65.49

—51.86

—37.47



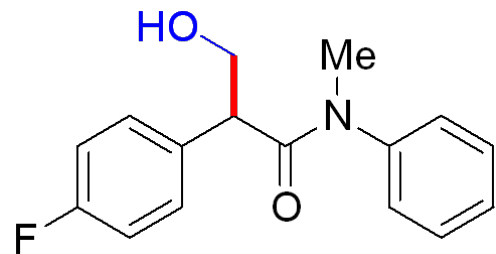

2b

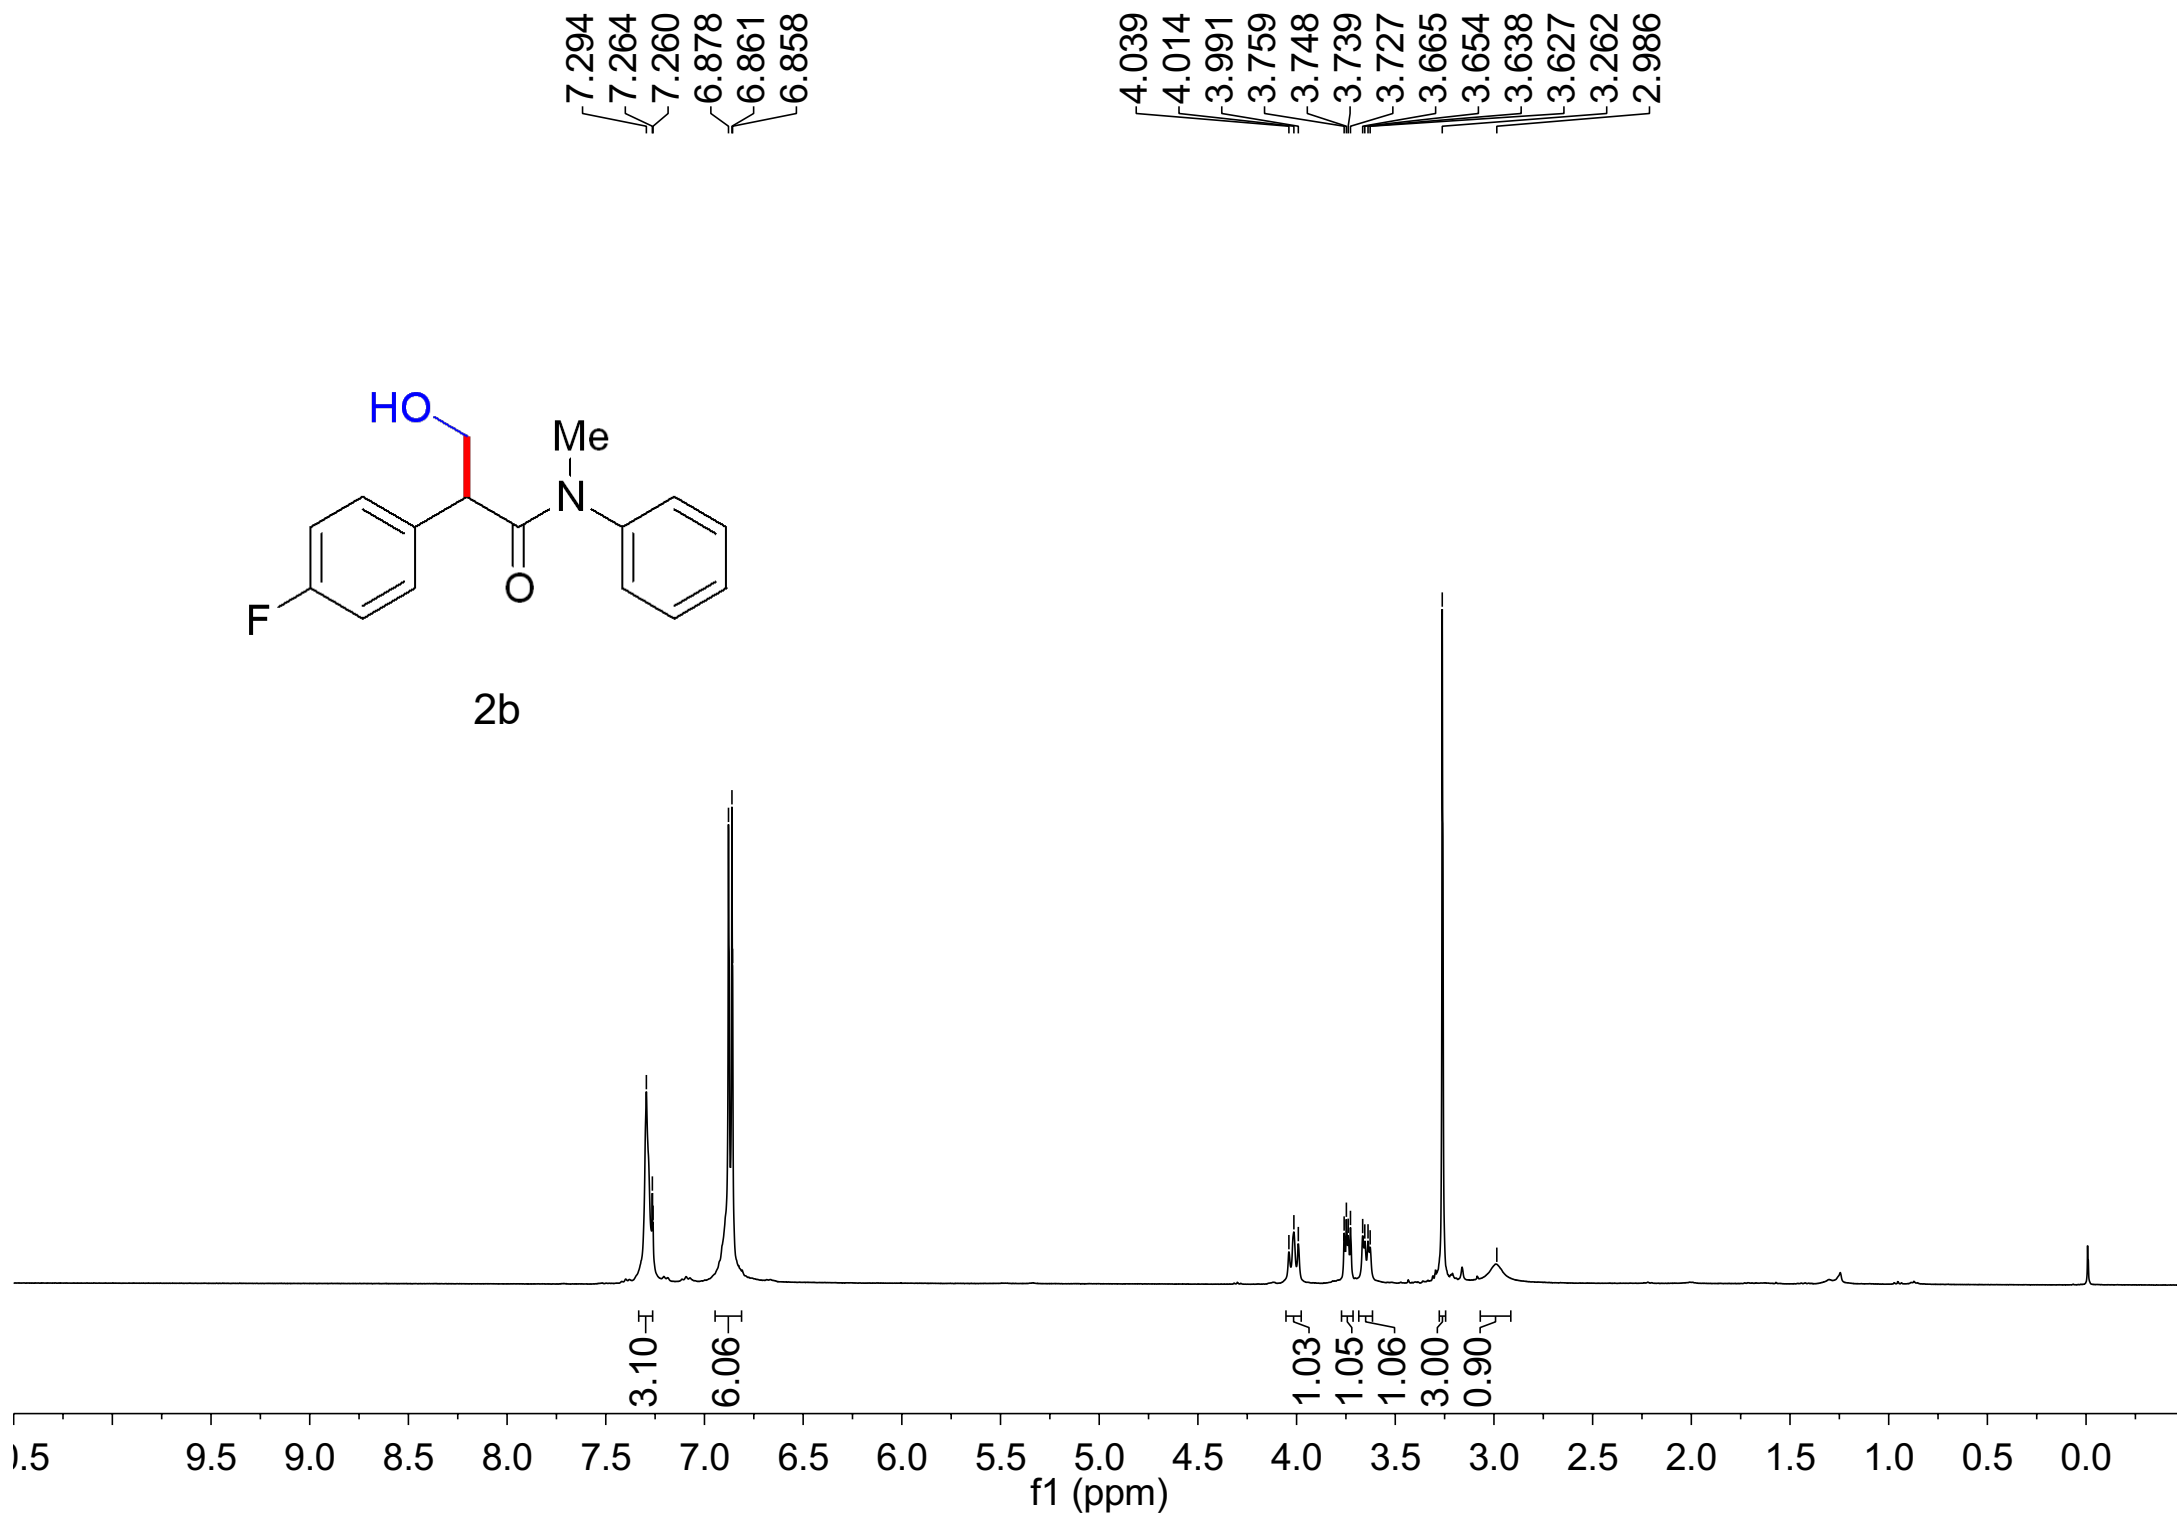

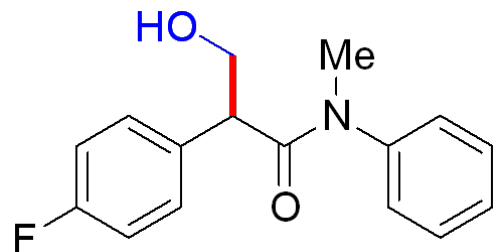

2b

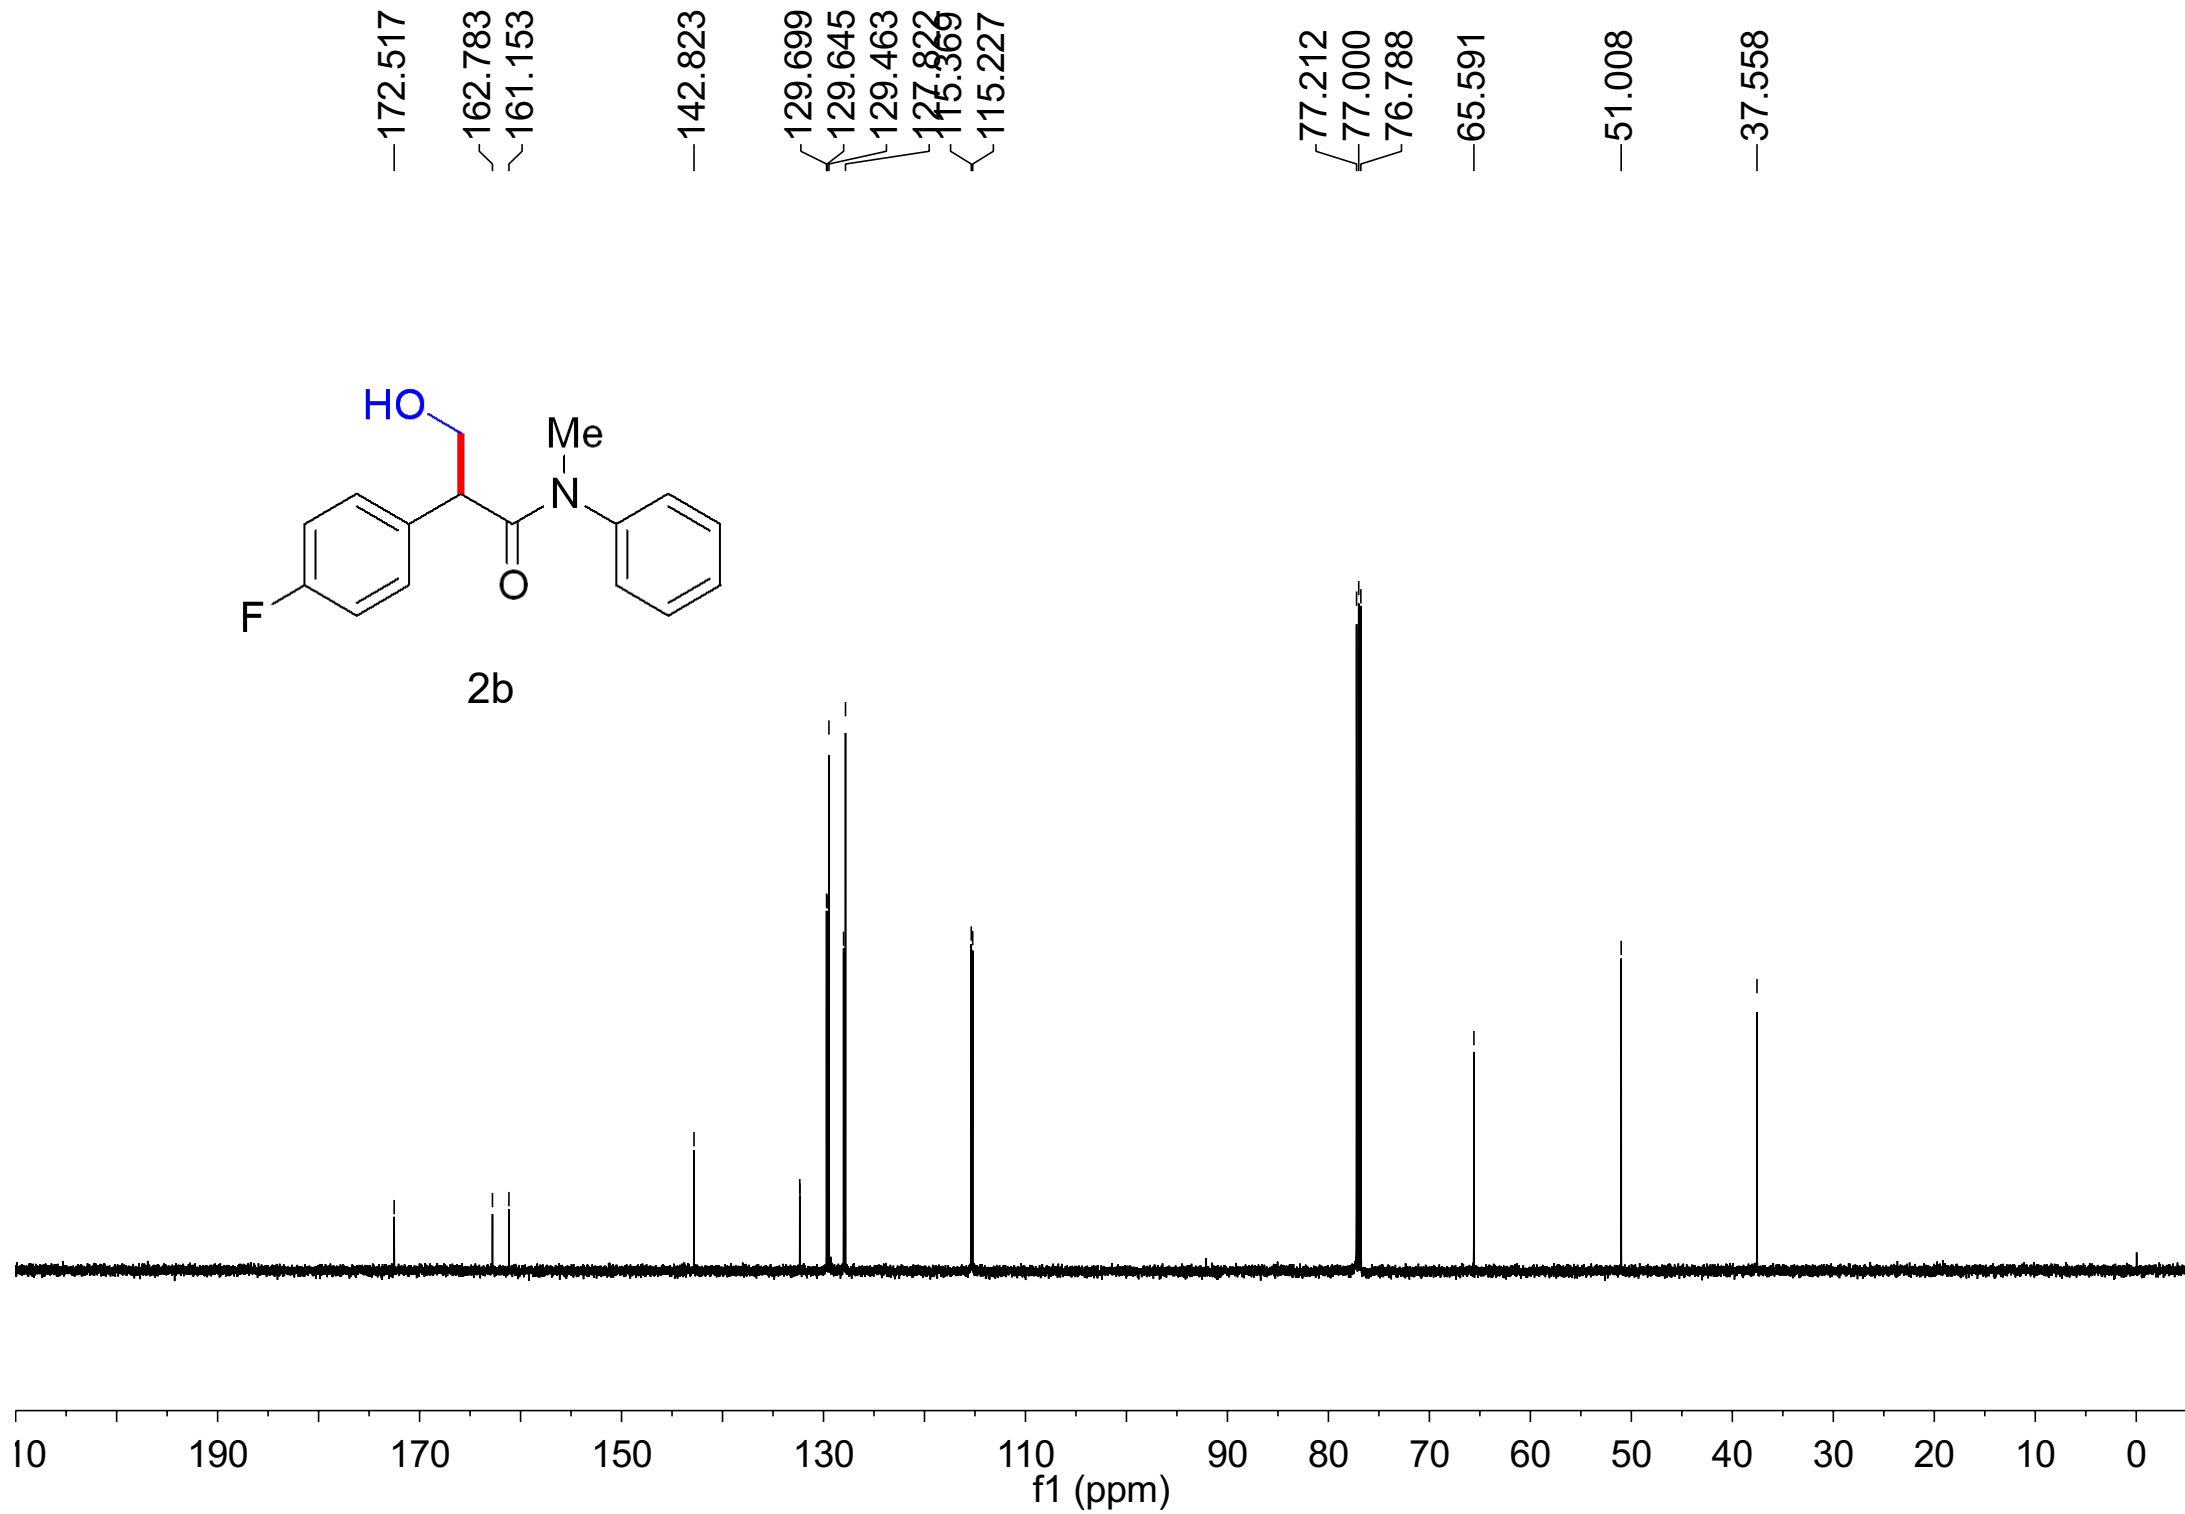

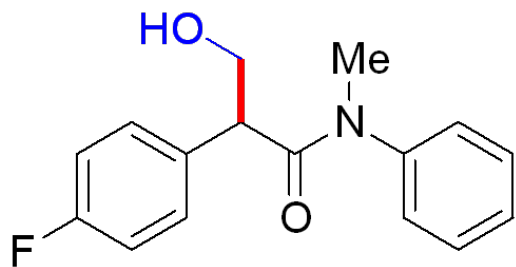

2b

115.68  
115.70  
115.71  
115.73  
115.75

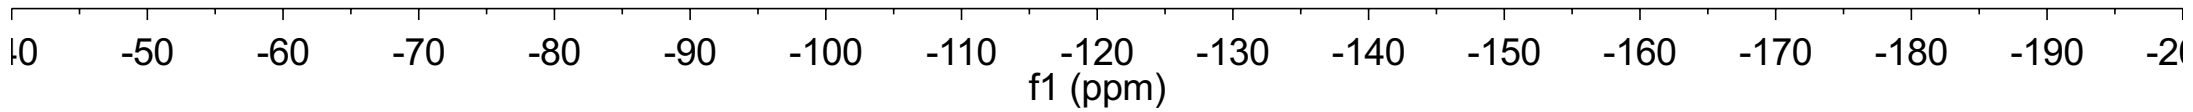



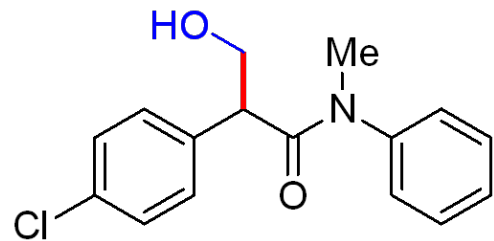

2c

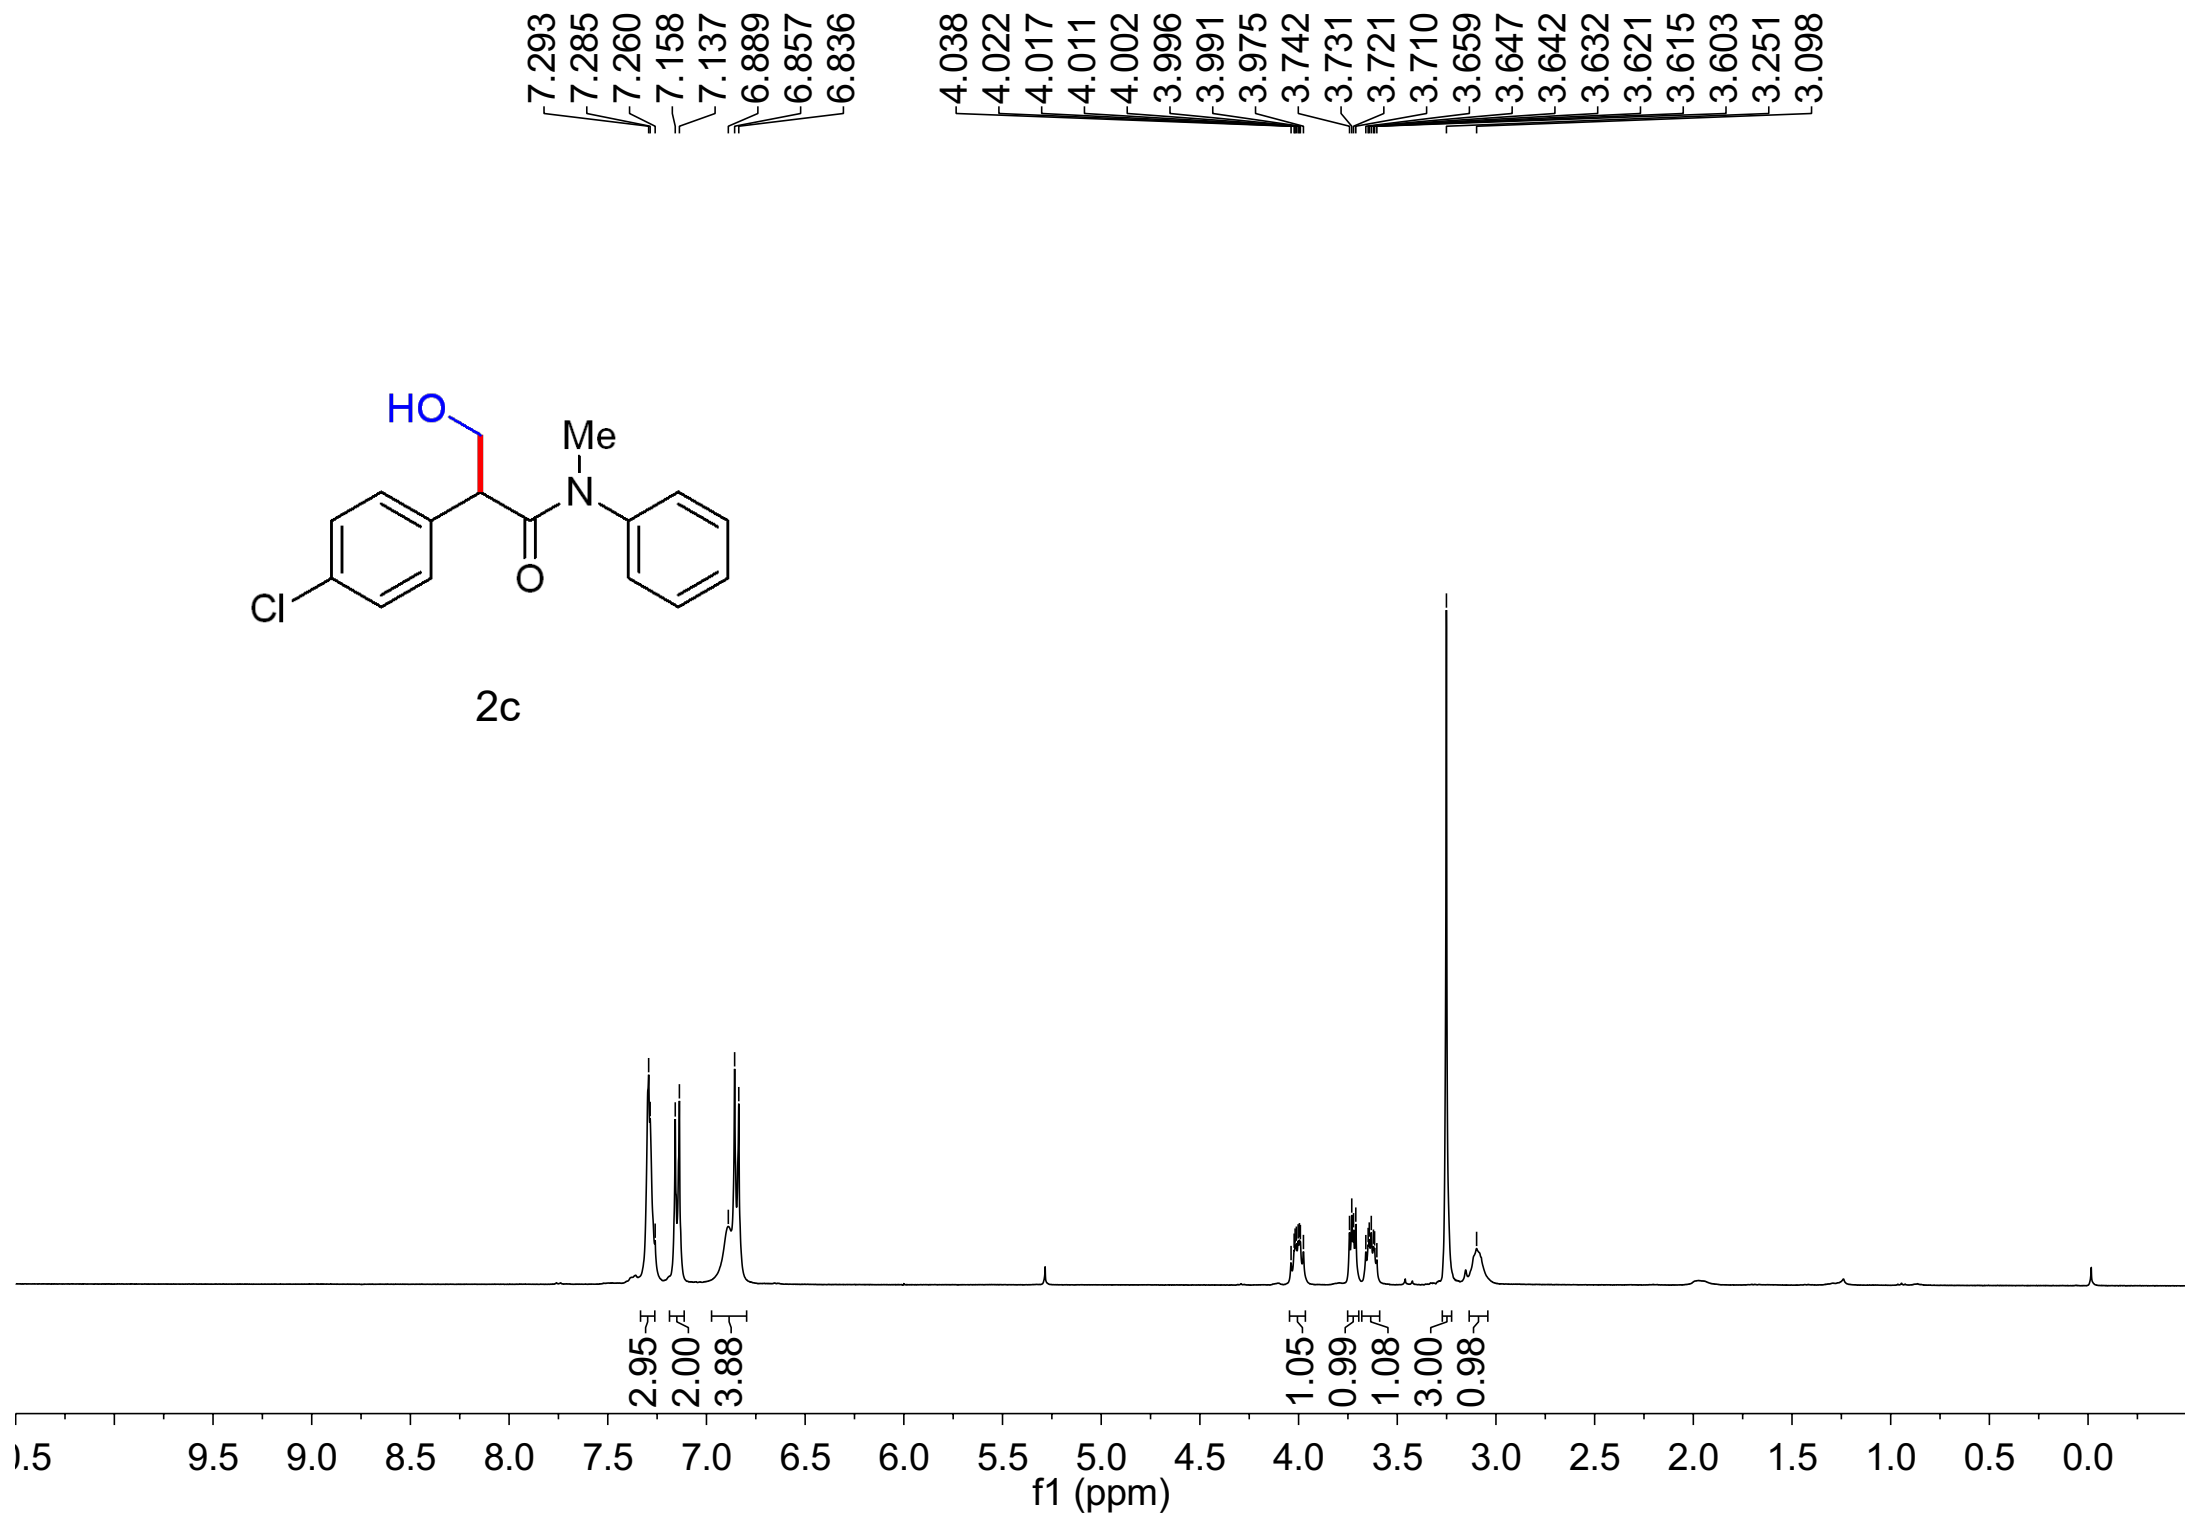

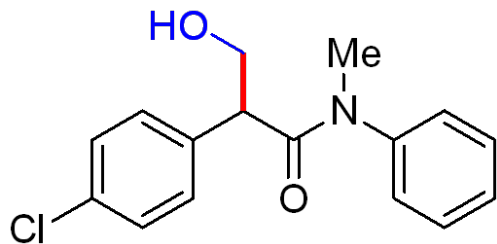

2c

—172.283

142.769

135.098

133.110

129.538

129.493

128.633

128.098

127.841

77.212

77.000

76.788

—65.540

—51.167

—37.592



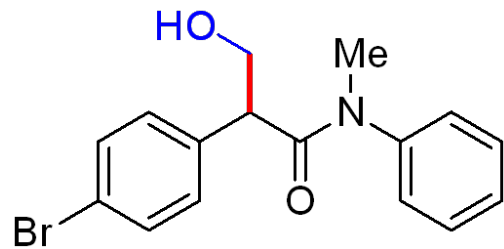

2d

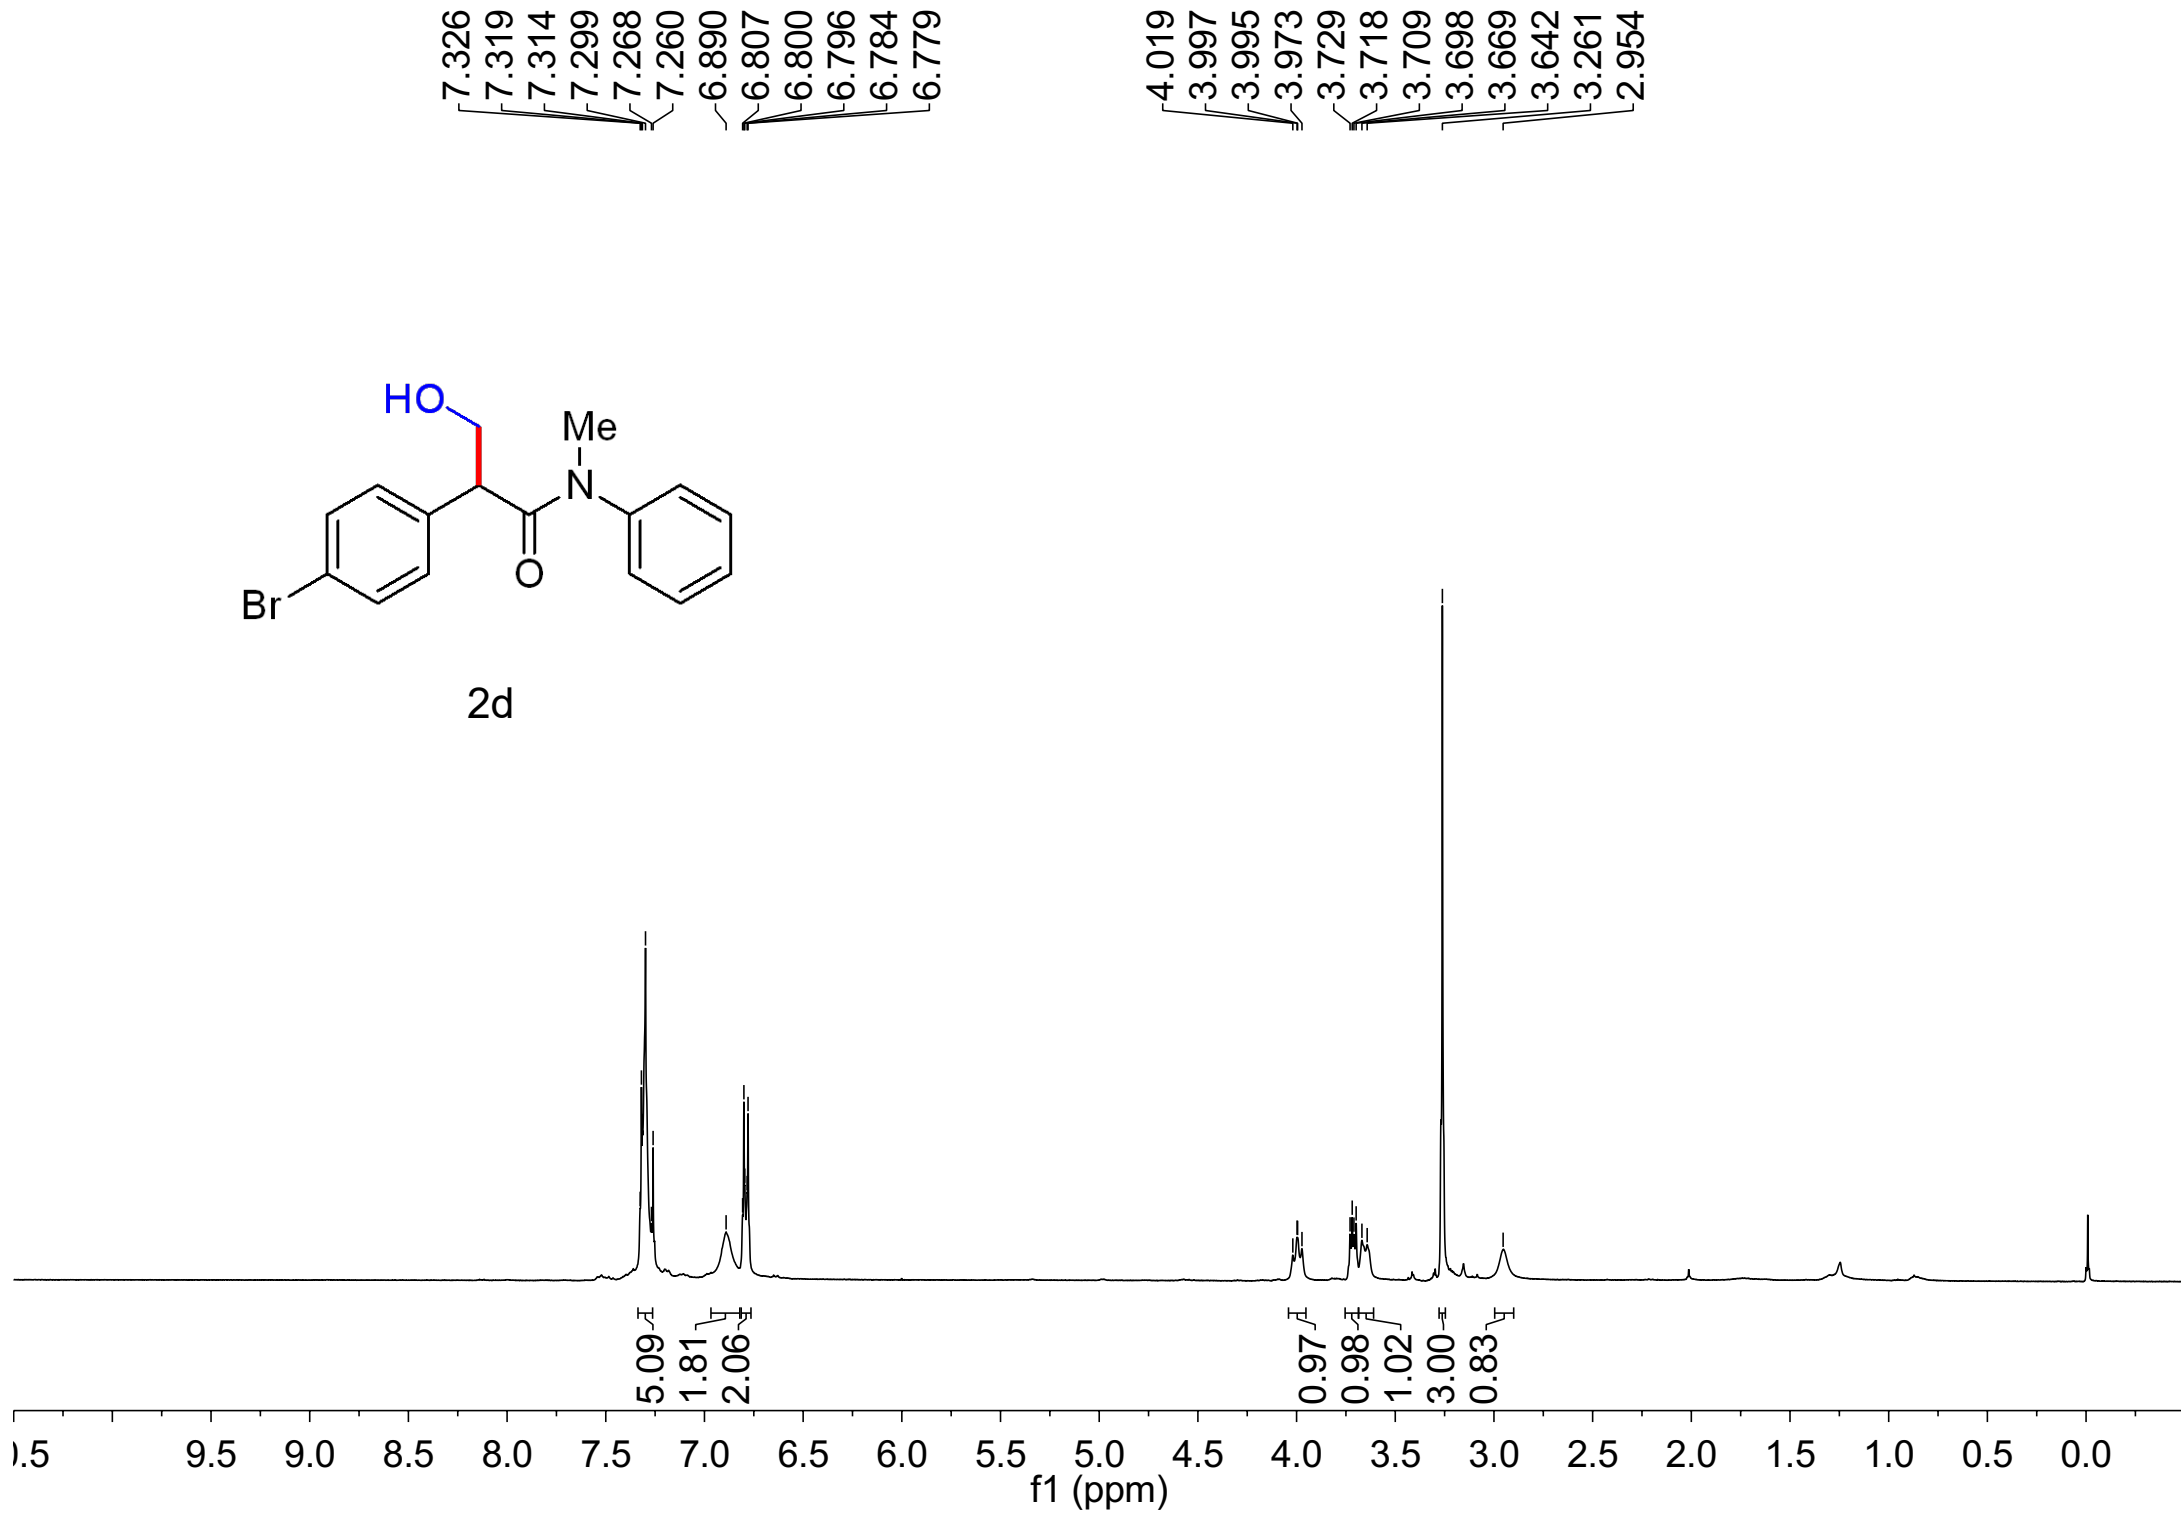

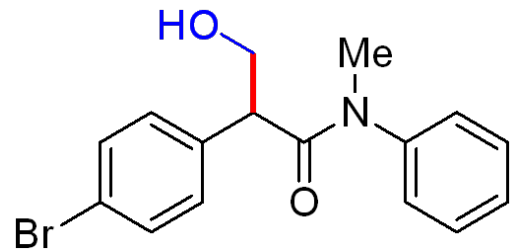

2d

—172.19

142.74  
135.60  
131.57  
129.85  
129.54  
128.10  
127.82  
121.20

77.21  
77.00  
76.79

—65.44

—51.21

—37.59

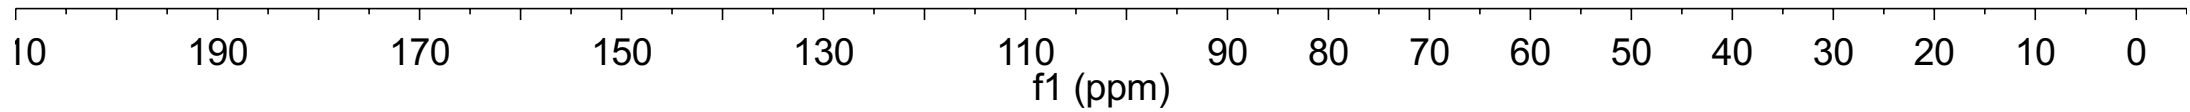

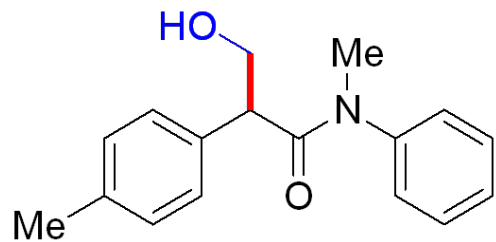

2e

7.282  
7.271  
7.260  
7.003  
6.984  
6.893  
6.809  
6.789

4.011  
3.731  
3.720  
3.711  
3.699  
3.657  
3.646  
3.630  
3.619  
3.261  
2.830  
-2.287

3.05  
2.05  
1.98  
2.09

1.01  
0.99  
1.00  
3.14  
0.65  
3.00

1.5 9.5 9.0 8.5 8.0 7.5 7.0 6.5 6.0 5.5 5.0 4.5 4.0 3.5 3.0 2.5 2.0 1.5 1.0 0.5 0.0  
f1 (ppm)

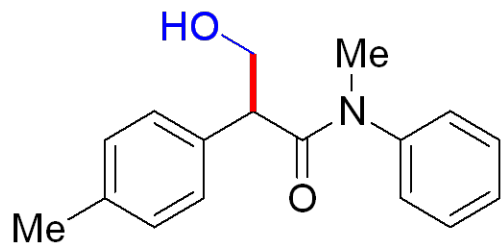

2e

—172.79

142.98

136.78

133.48

129.36

129.14

128.00

127.91

127.86

77.21

77.00

76.79

—65.78

—51.49

—37.55

—21.03



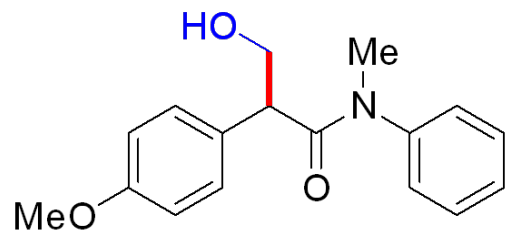

2f

7.288  
7.284  
7.276  
7.260  
6.891  
6.832  
6.810  
6.728  
6.706

4.050  
4.036  
4.023  
4.015  
4.003  
3.989  
3.760  
3.709  
3.698  
3.689  
3.677  
3.653  
3.637  
3.625  
3.611  
3.598  
3.254  
2.890

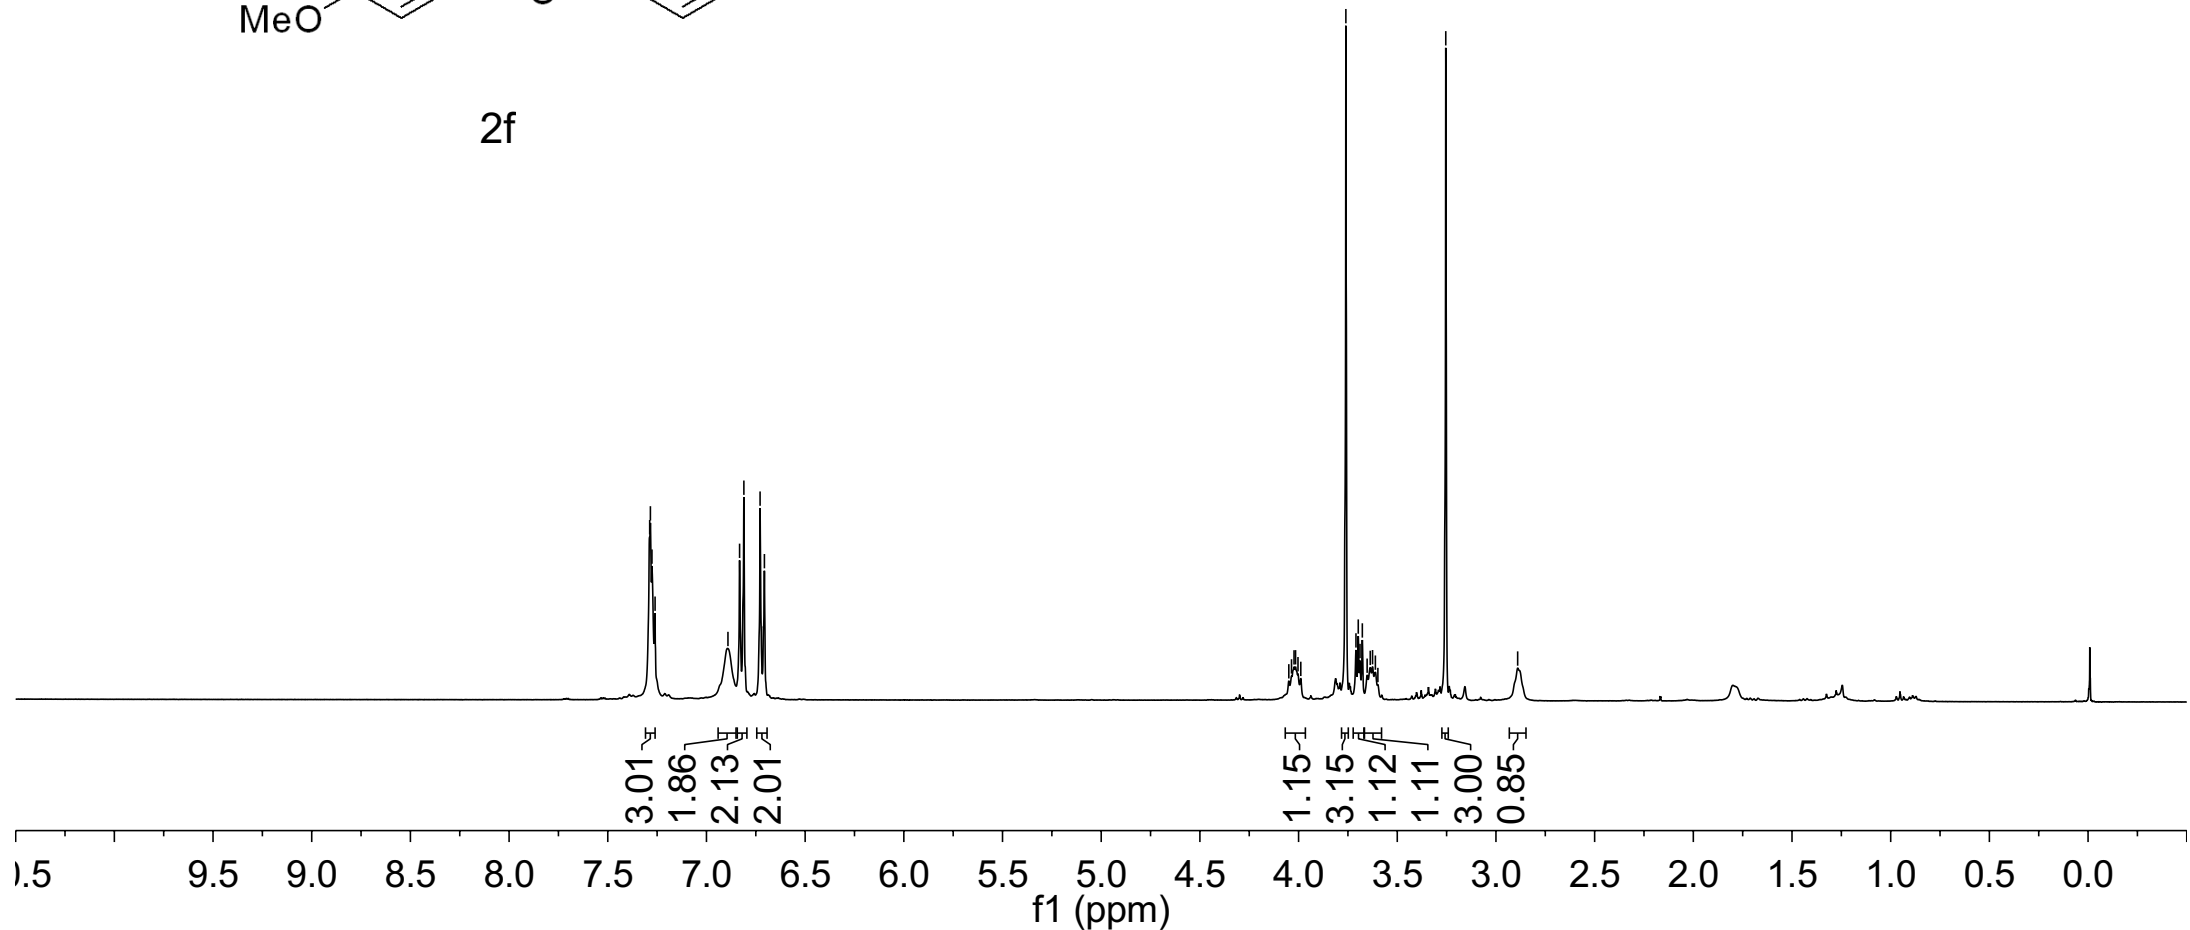

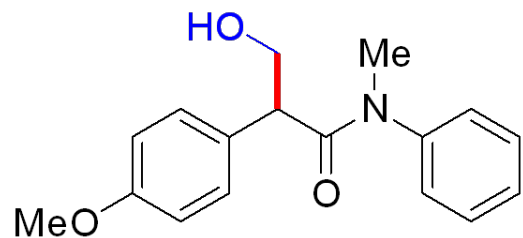

2f

—172.90  
—158.71  
—142.96  
129.36  
129.18  
128.62  
127.89  
127.87  
—113.85

77.21  
77.00  
76.79  
—65.71  
—55.20  
—50.98  
—37.53

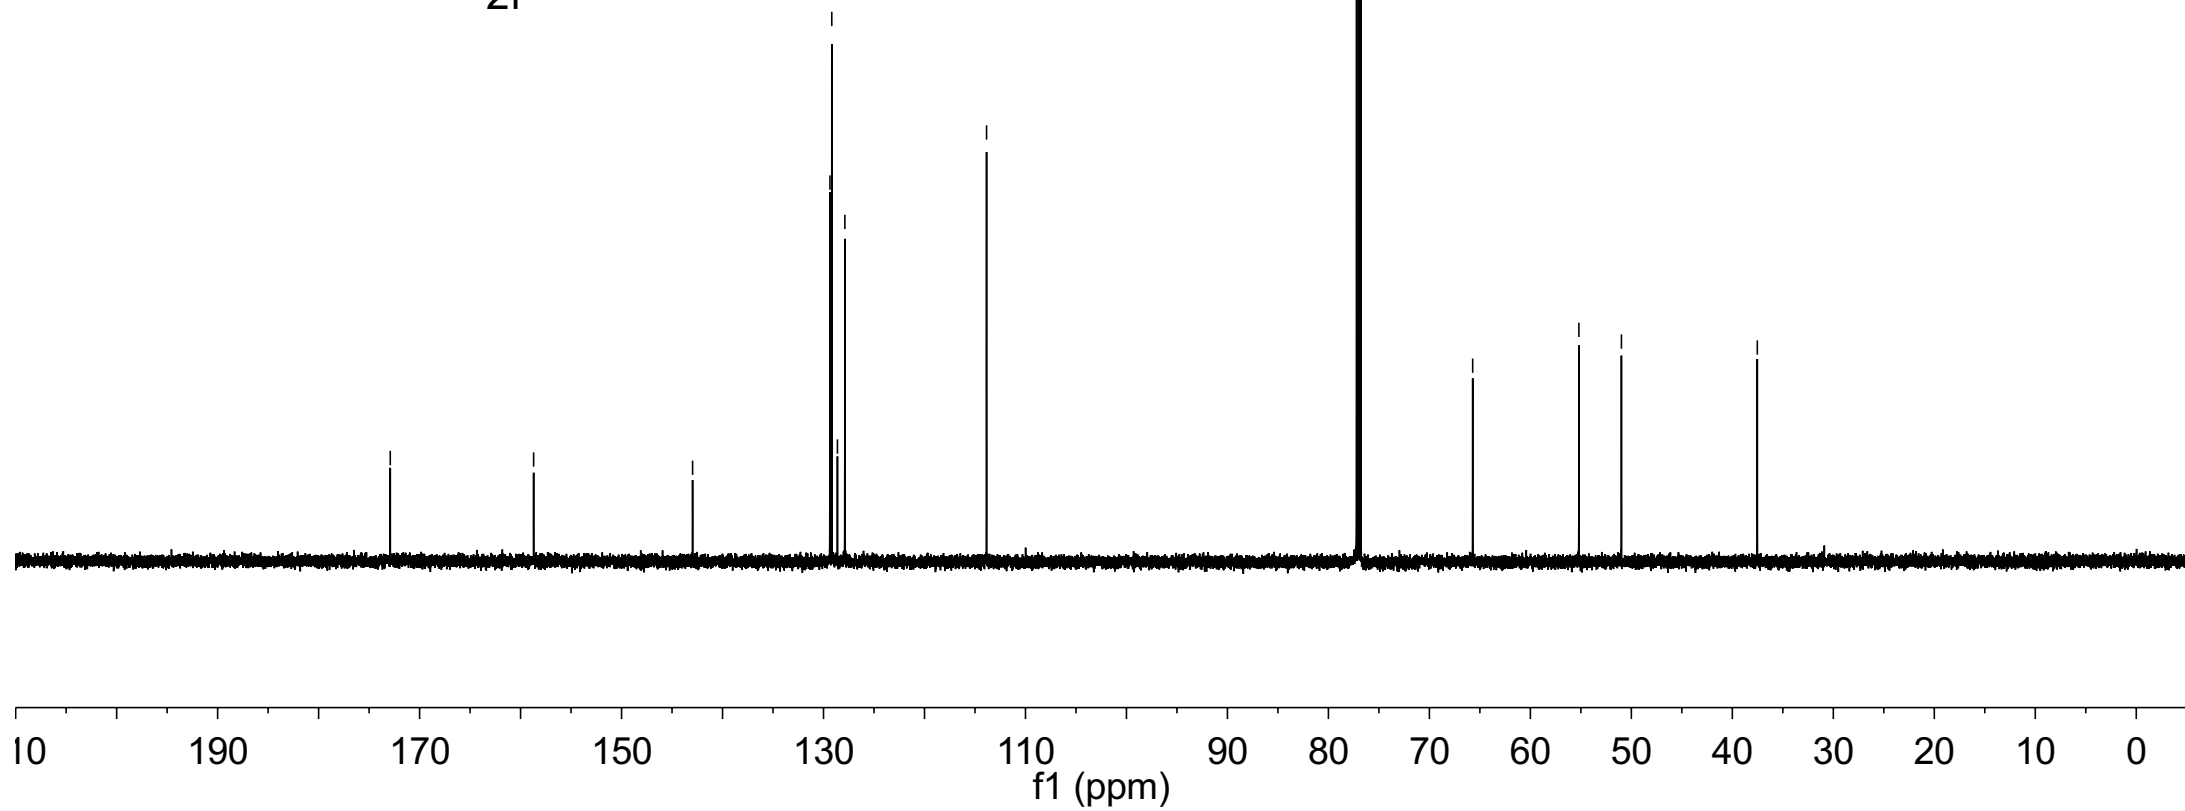



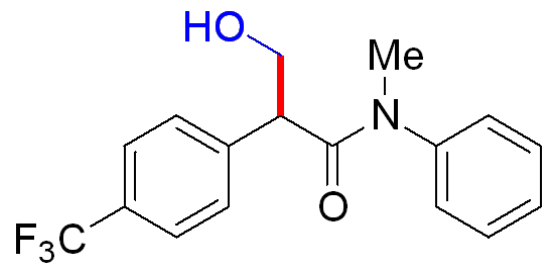

2g

7.452  
7.432  
7.298  
7.282  
7.260  
7.053  
7.033  
6.878

4.060  
4.039  
4.033  
4.027  
4.015  
4.000  
3.838  
3.827  
3.818  
3.807  
3.725  
3.710  
3.698  
3.685  
3.672  
3.272  
3.057

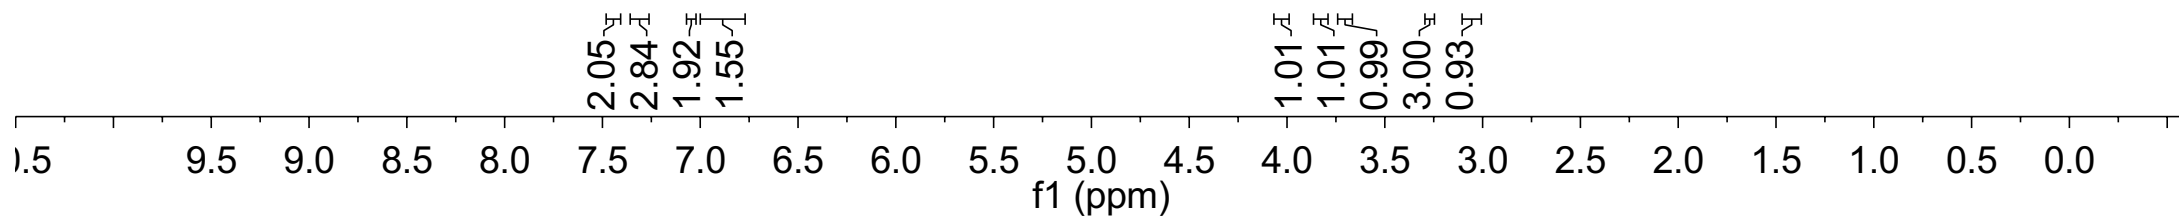

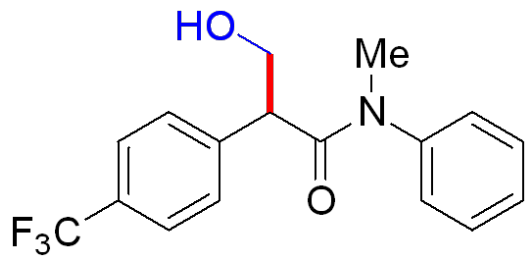

2g

- 171.953
- 142.668
- 140.657
- 129.578
- 129.364
- 128.510
- 128.172
- 127.781
- 125.391
- 125.366
- 125.342
- 125.316
- 124.927
- 123.124
- 77.212
- 77.000
- 76.788
- 65.410
- 51.607
- 37.612

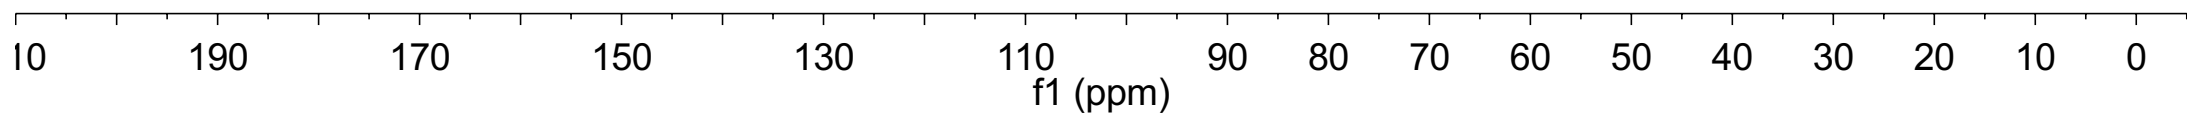

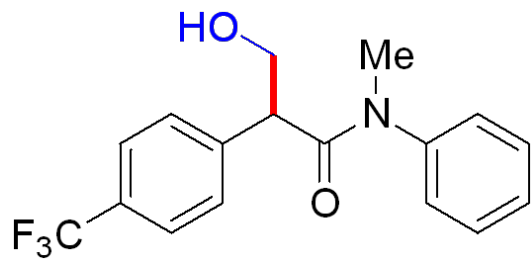

2g

-62.907  
-62.965

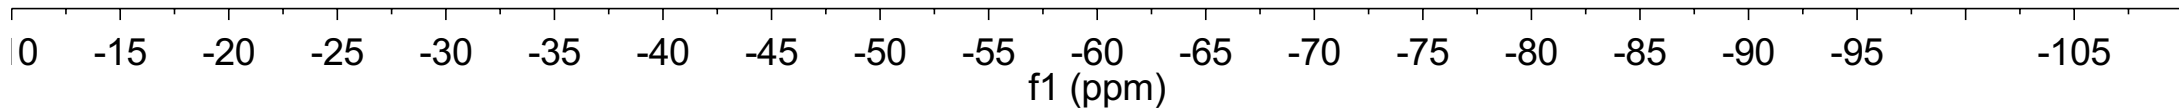

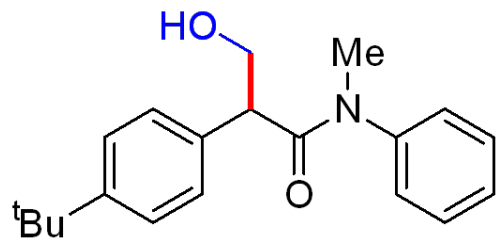

2h

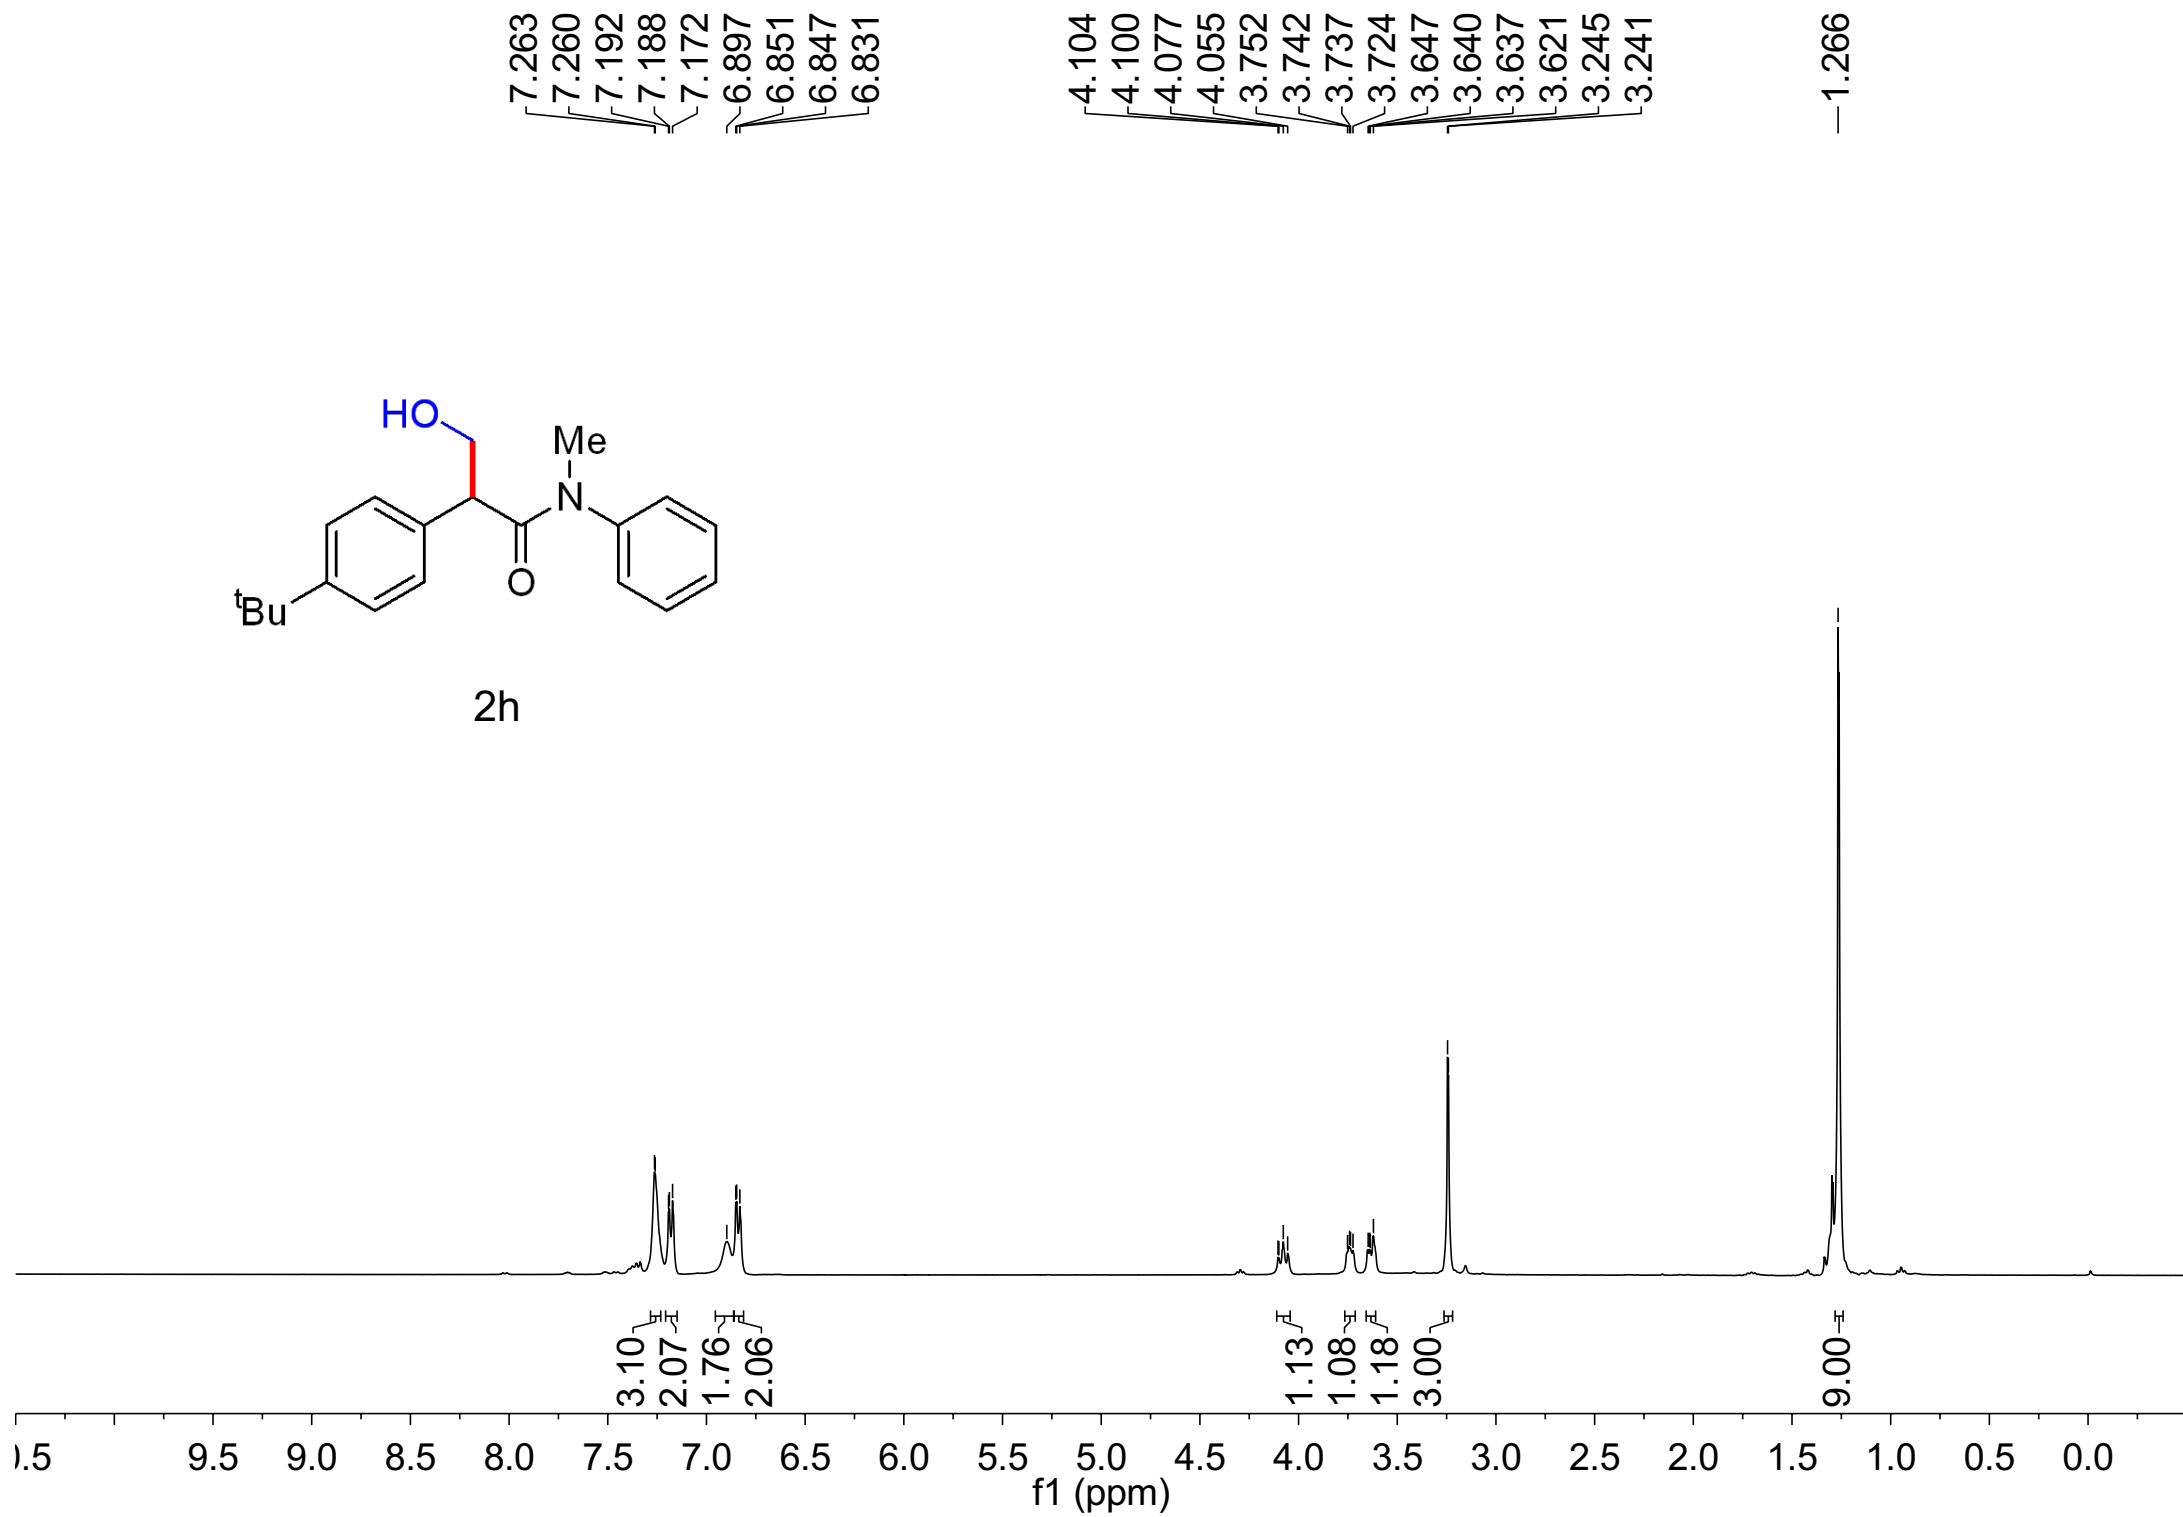

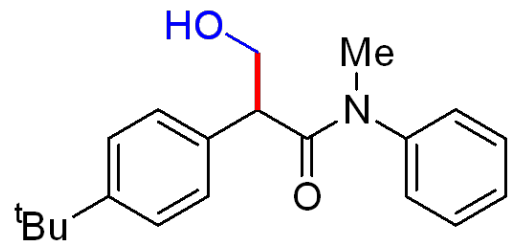

2h

172.93  
149.94  
142.93  
133.31  
129.27  
127.82  
127.76  
127.73  
125.24

77.21  
77.00  
76.79  
65.52  
51.36  
37.55  
34.32  
31.27  
31.25

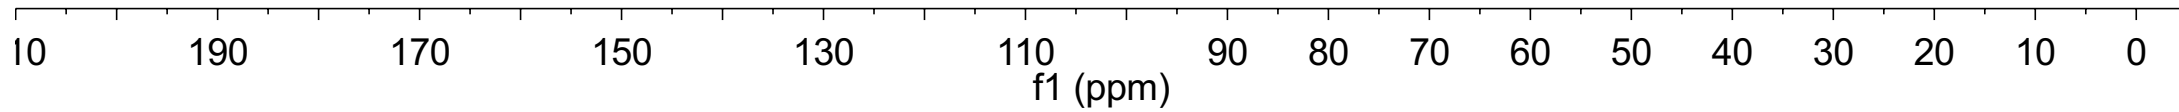

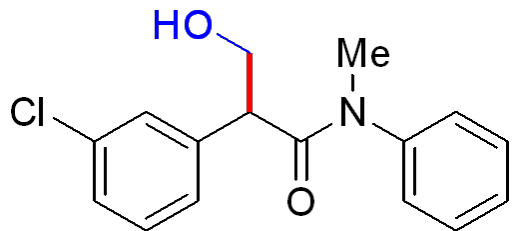

2i

7.303  
7.289  
7.273  
7.260  
7.177  
7.157  
7.127  
7.108  
7.089  
6.877  
6.873  
6.869  
6.803  
6.784

4.044  
4.025  
4.005  
3.735  
3.724  
3.715  
3.704  
3.666  
3.652  
3.640  
3.264  
3.034

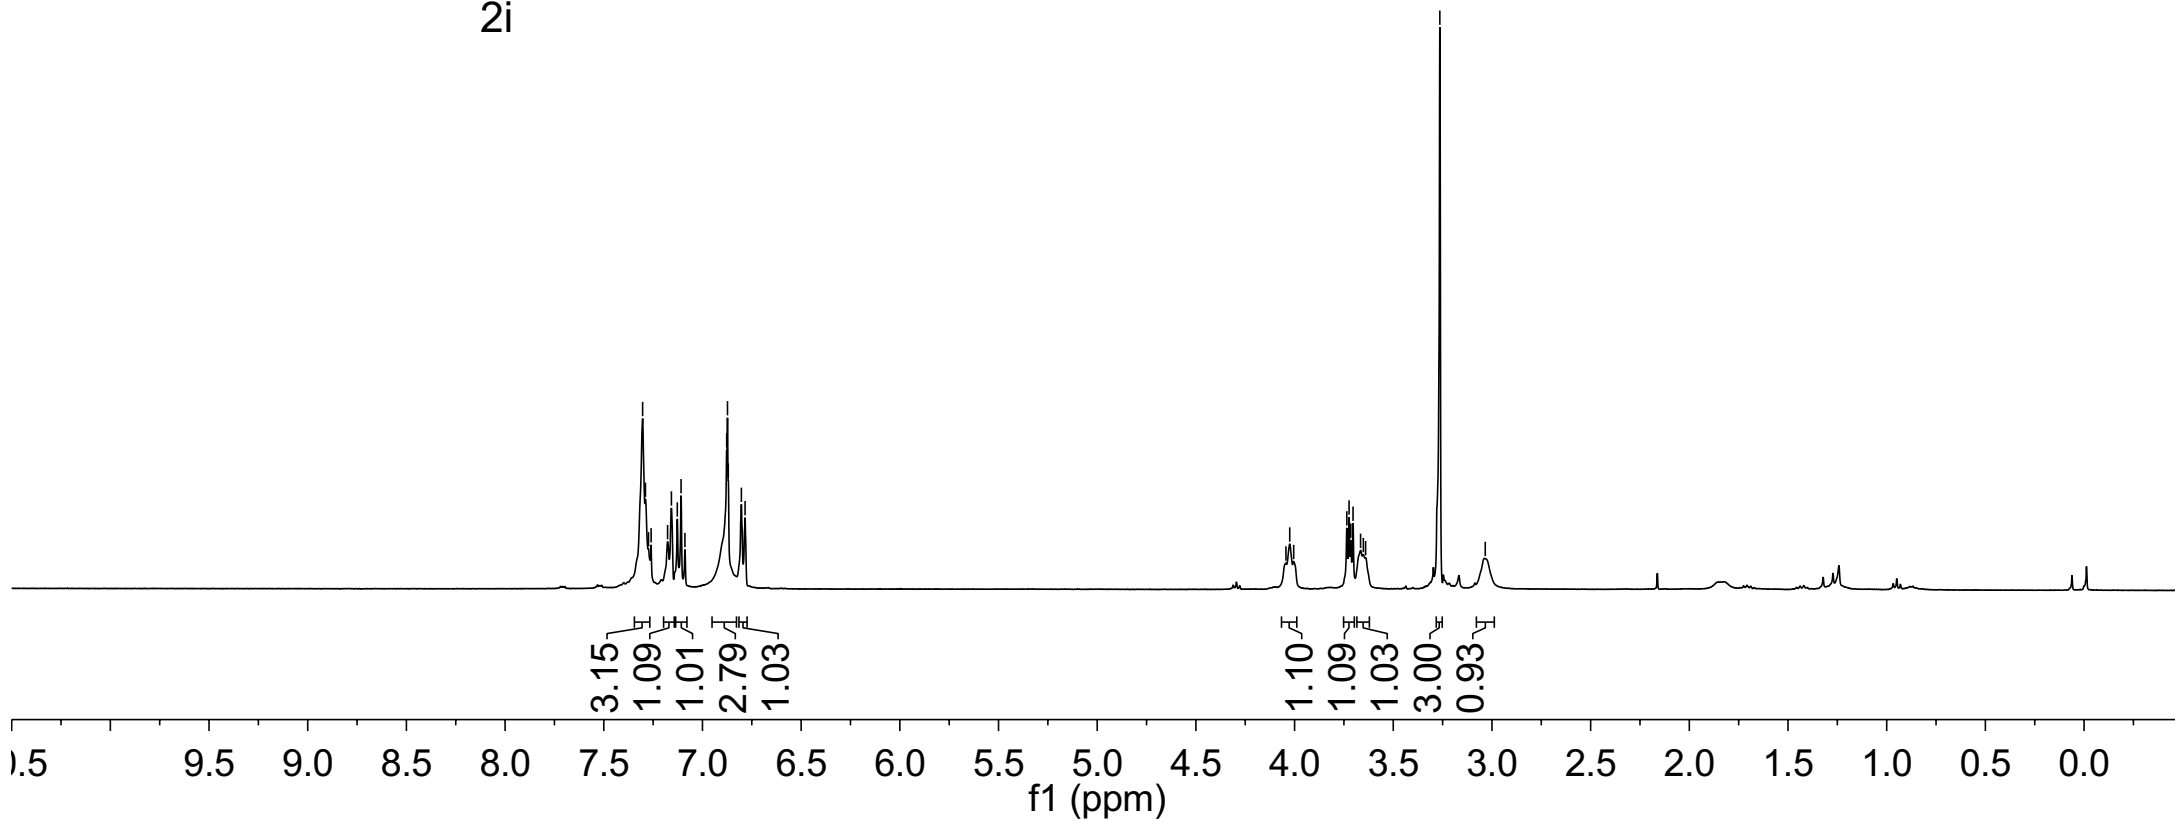

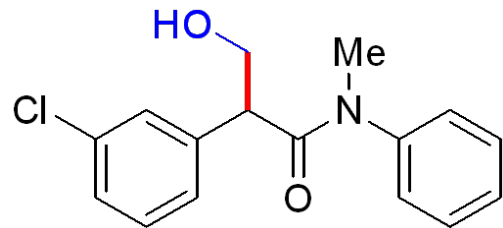

2i

172.00  
142.66  
138.53  
134.21  
129.64  
129.49  
128.30  
128.12  
127.83  
127.37  
126.28  
77.21  
77.00  
76.79  
65.39  
51.51  
37.59



7.281  
7.276  
7.268  
7.255  
7.244  
7.107  
7.087  
7.067  
6.906  
6.741  
6.735  
6.720  
6.714  
6.511  
6.491  
6.450  
6.445

4.083  
4.069  
4.062  
4.049  
3.740  
3.728  
3.719  
3.699  
3.673  
3.659  
3.647  
3.633  
3.622

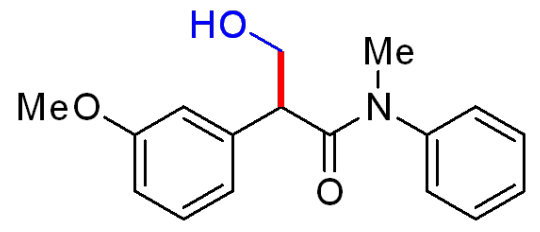

2j

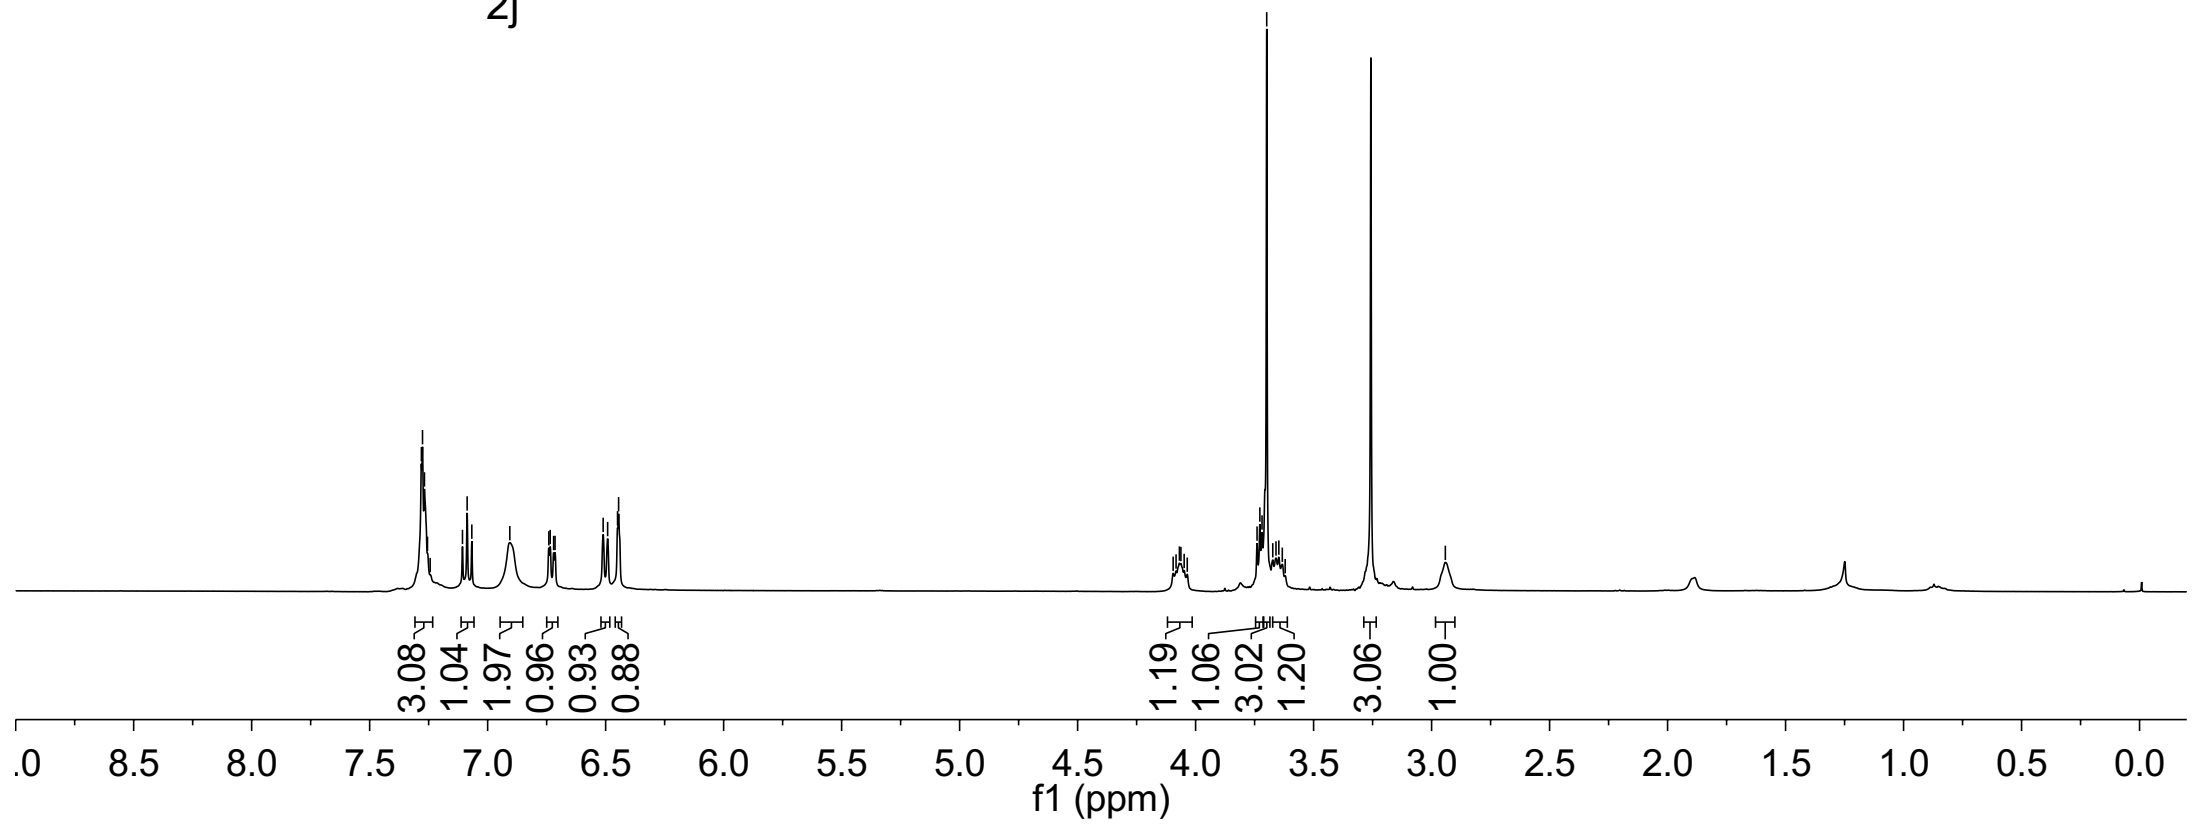



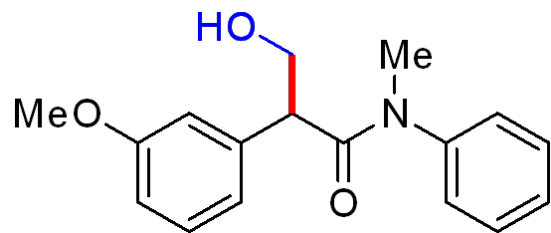

2j

—172.40

—159.52

—142.86

—137.98

129.32

127.88

127.83

120.45

113.49

112.83

77.21

77.00

76.79

—65.55

~55.05

~51.96

—37.54



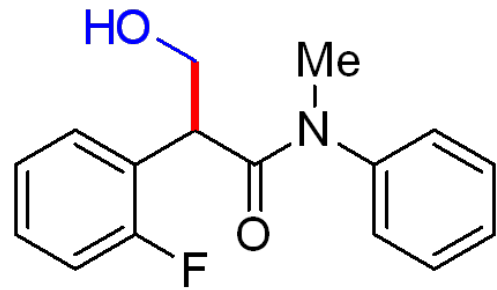

2k

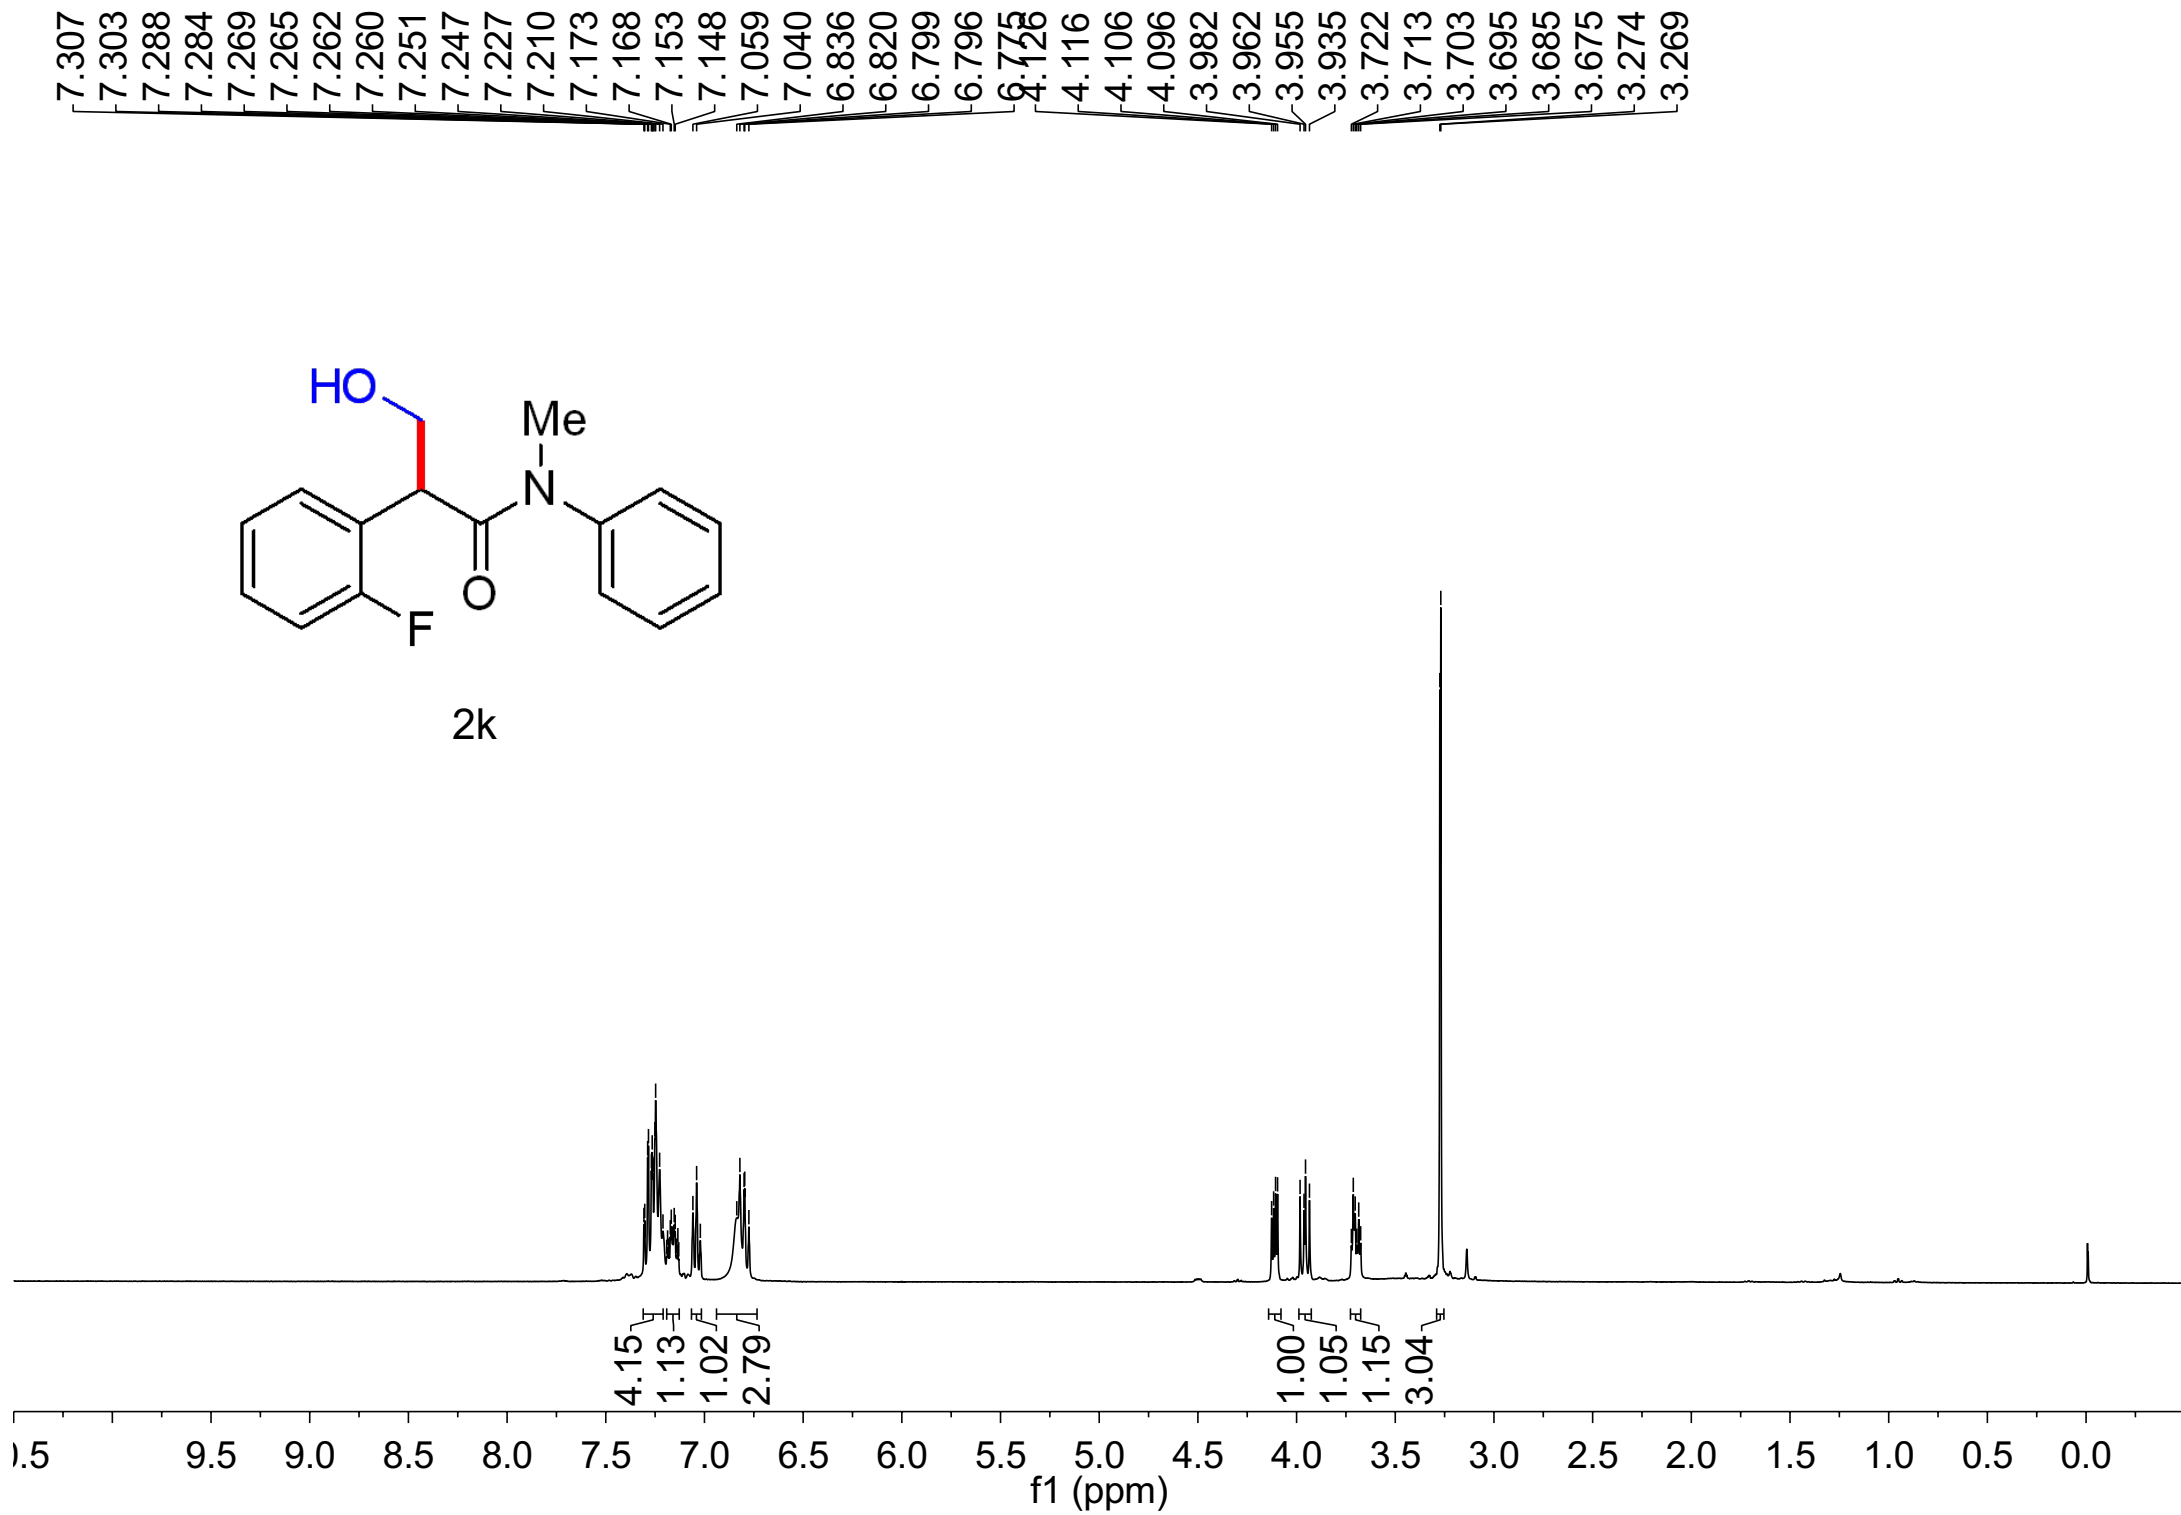

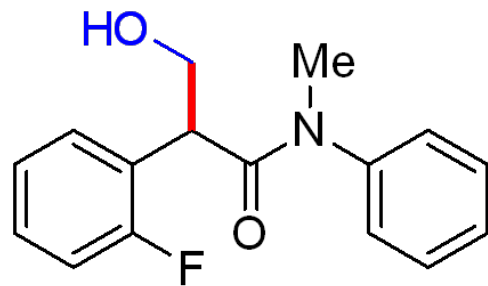

2k

172.554  
160.861  
159.225  
142.433  
129.420  
127.946  
127.440  
124.988  
115.168  
115.019

77.212  
77.000  
76.788

64.268

43.925

37.615

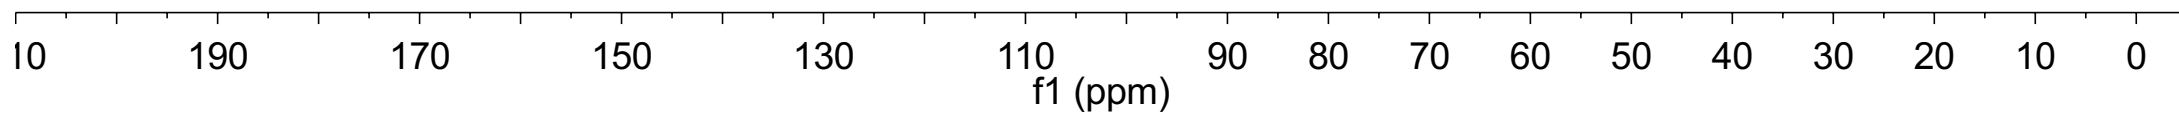

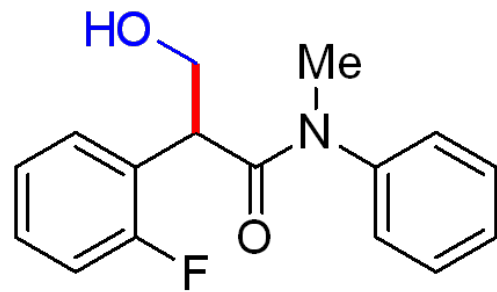

2k

119.383  
119.402  
119.409  
119.416  
119.423  
119.427  
119.442

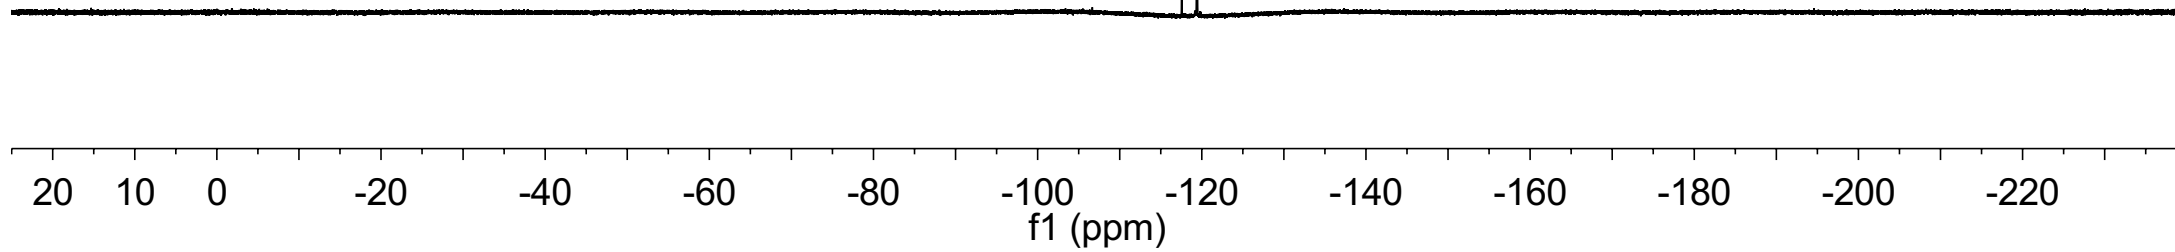

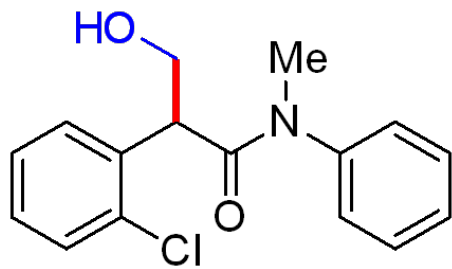

2I

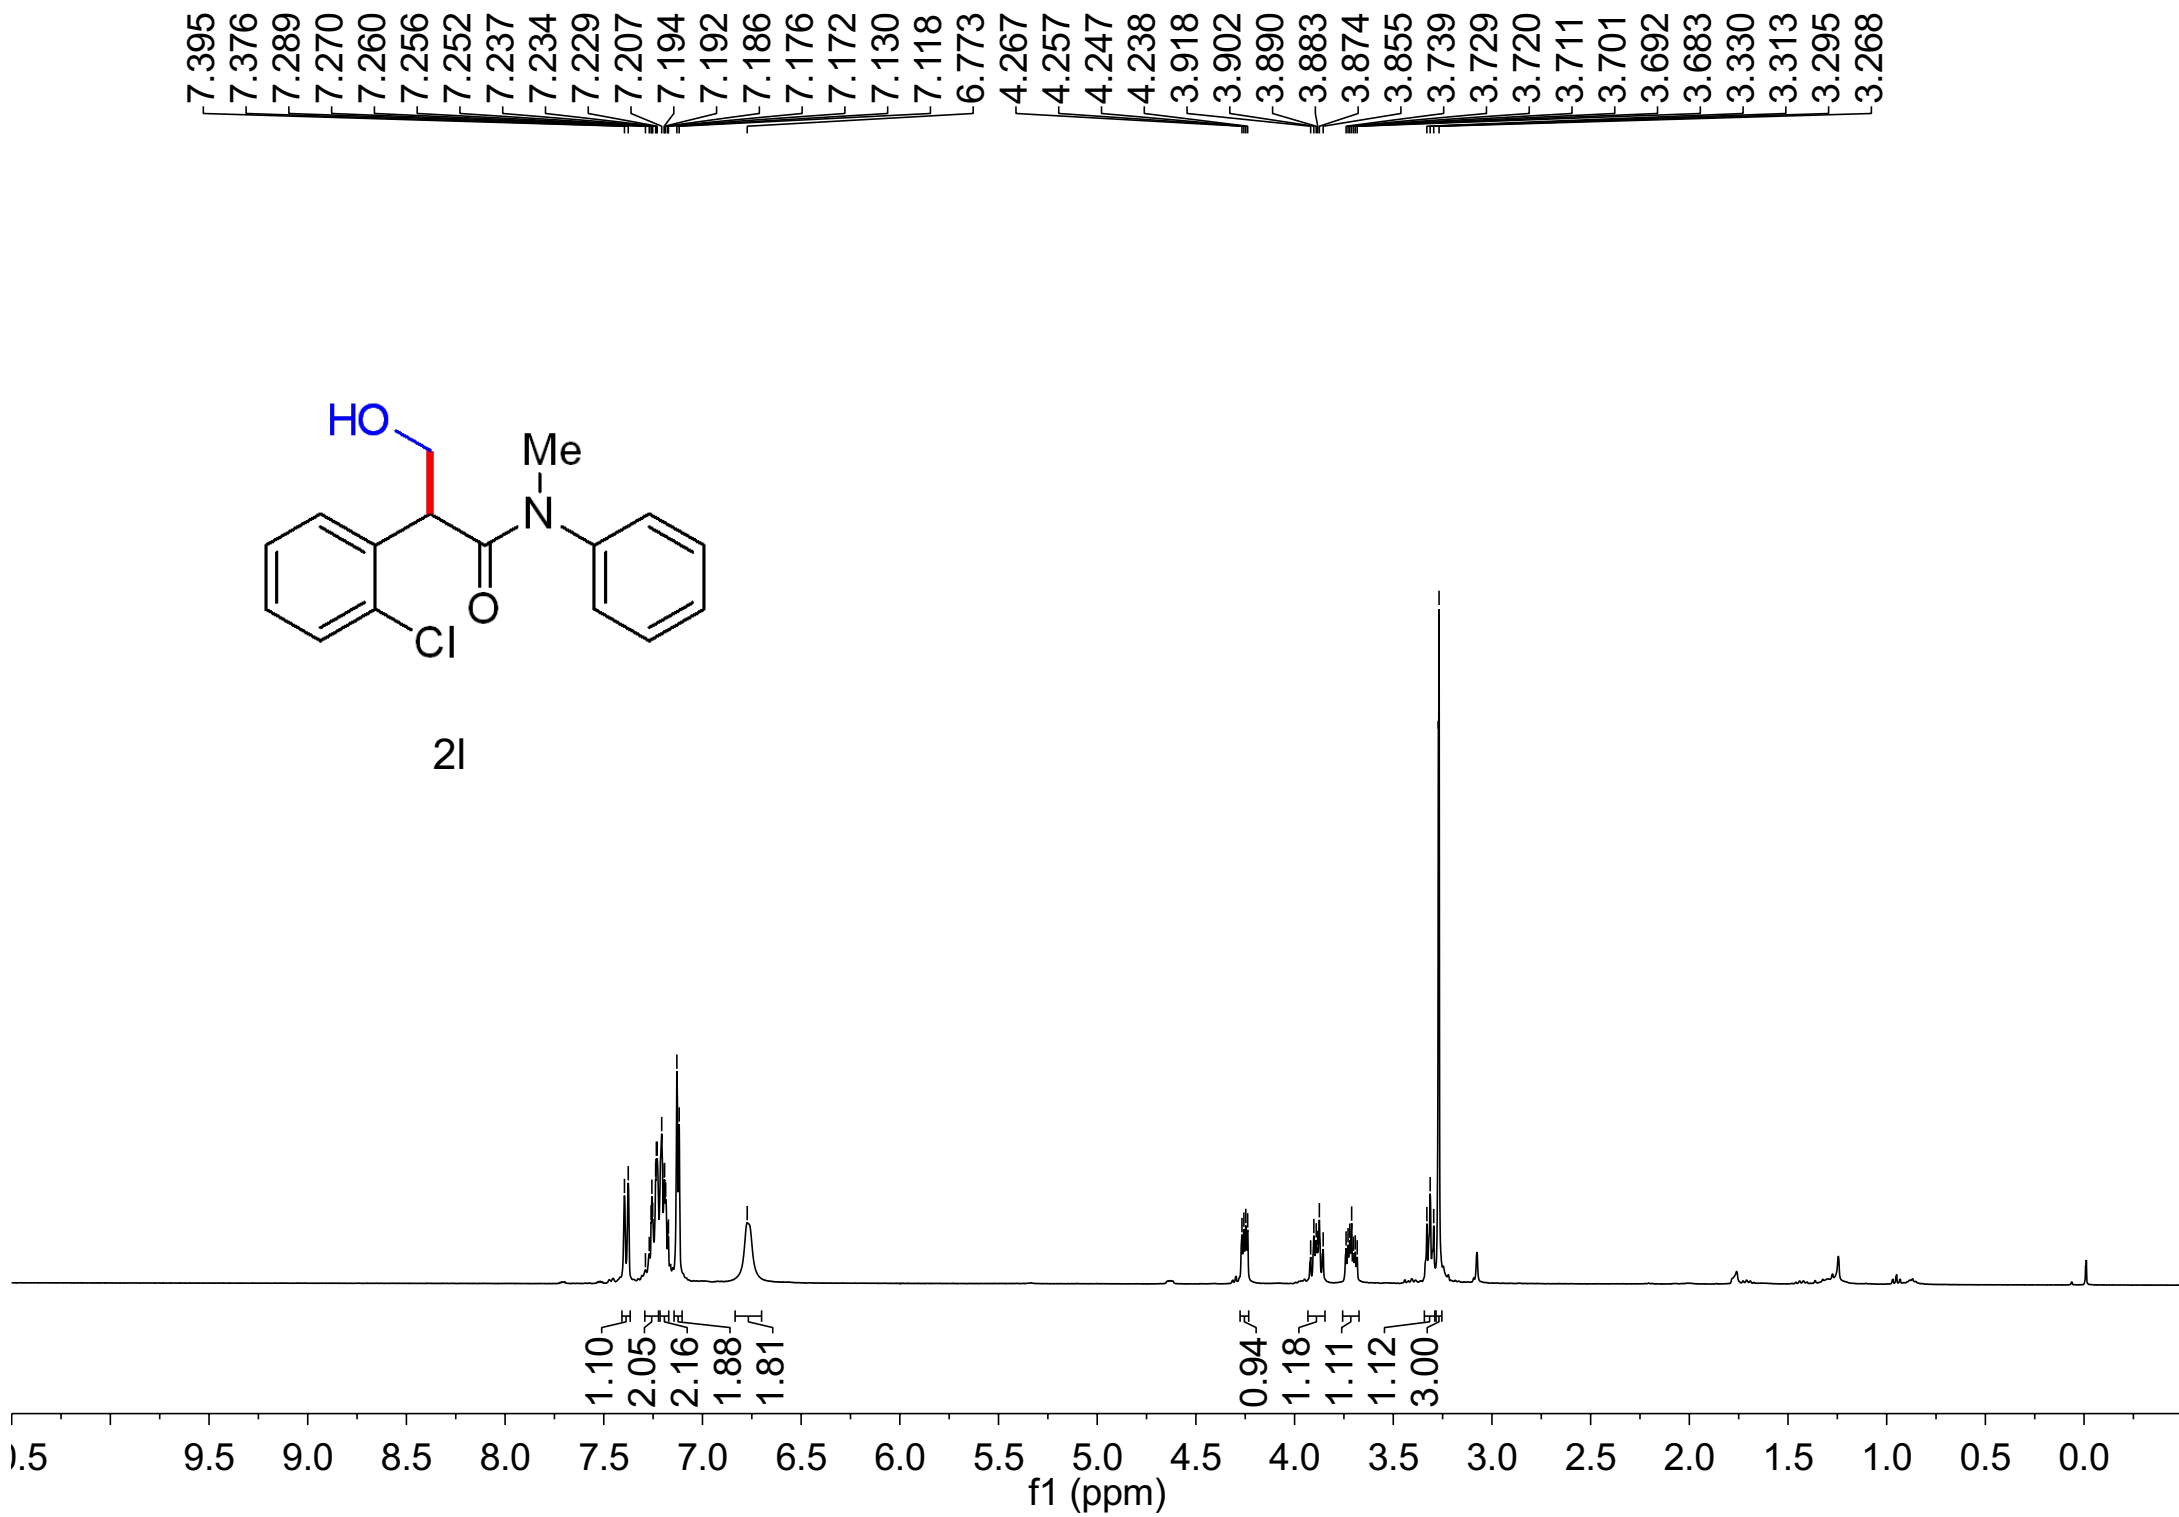

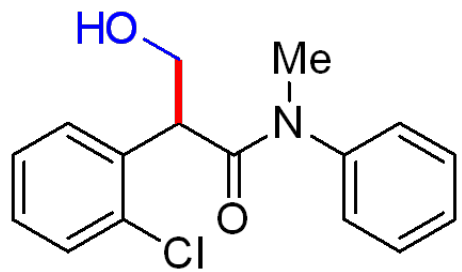

2I

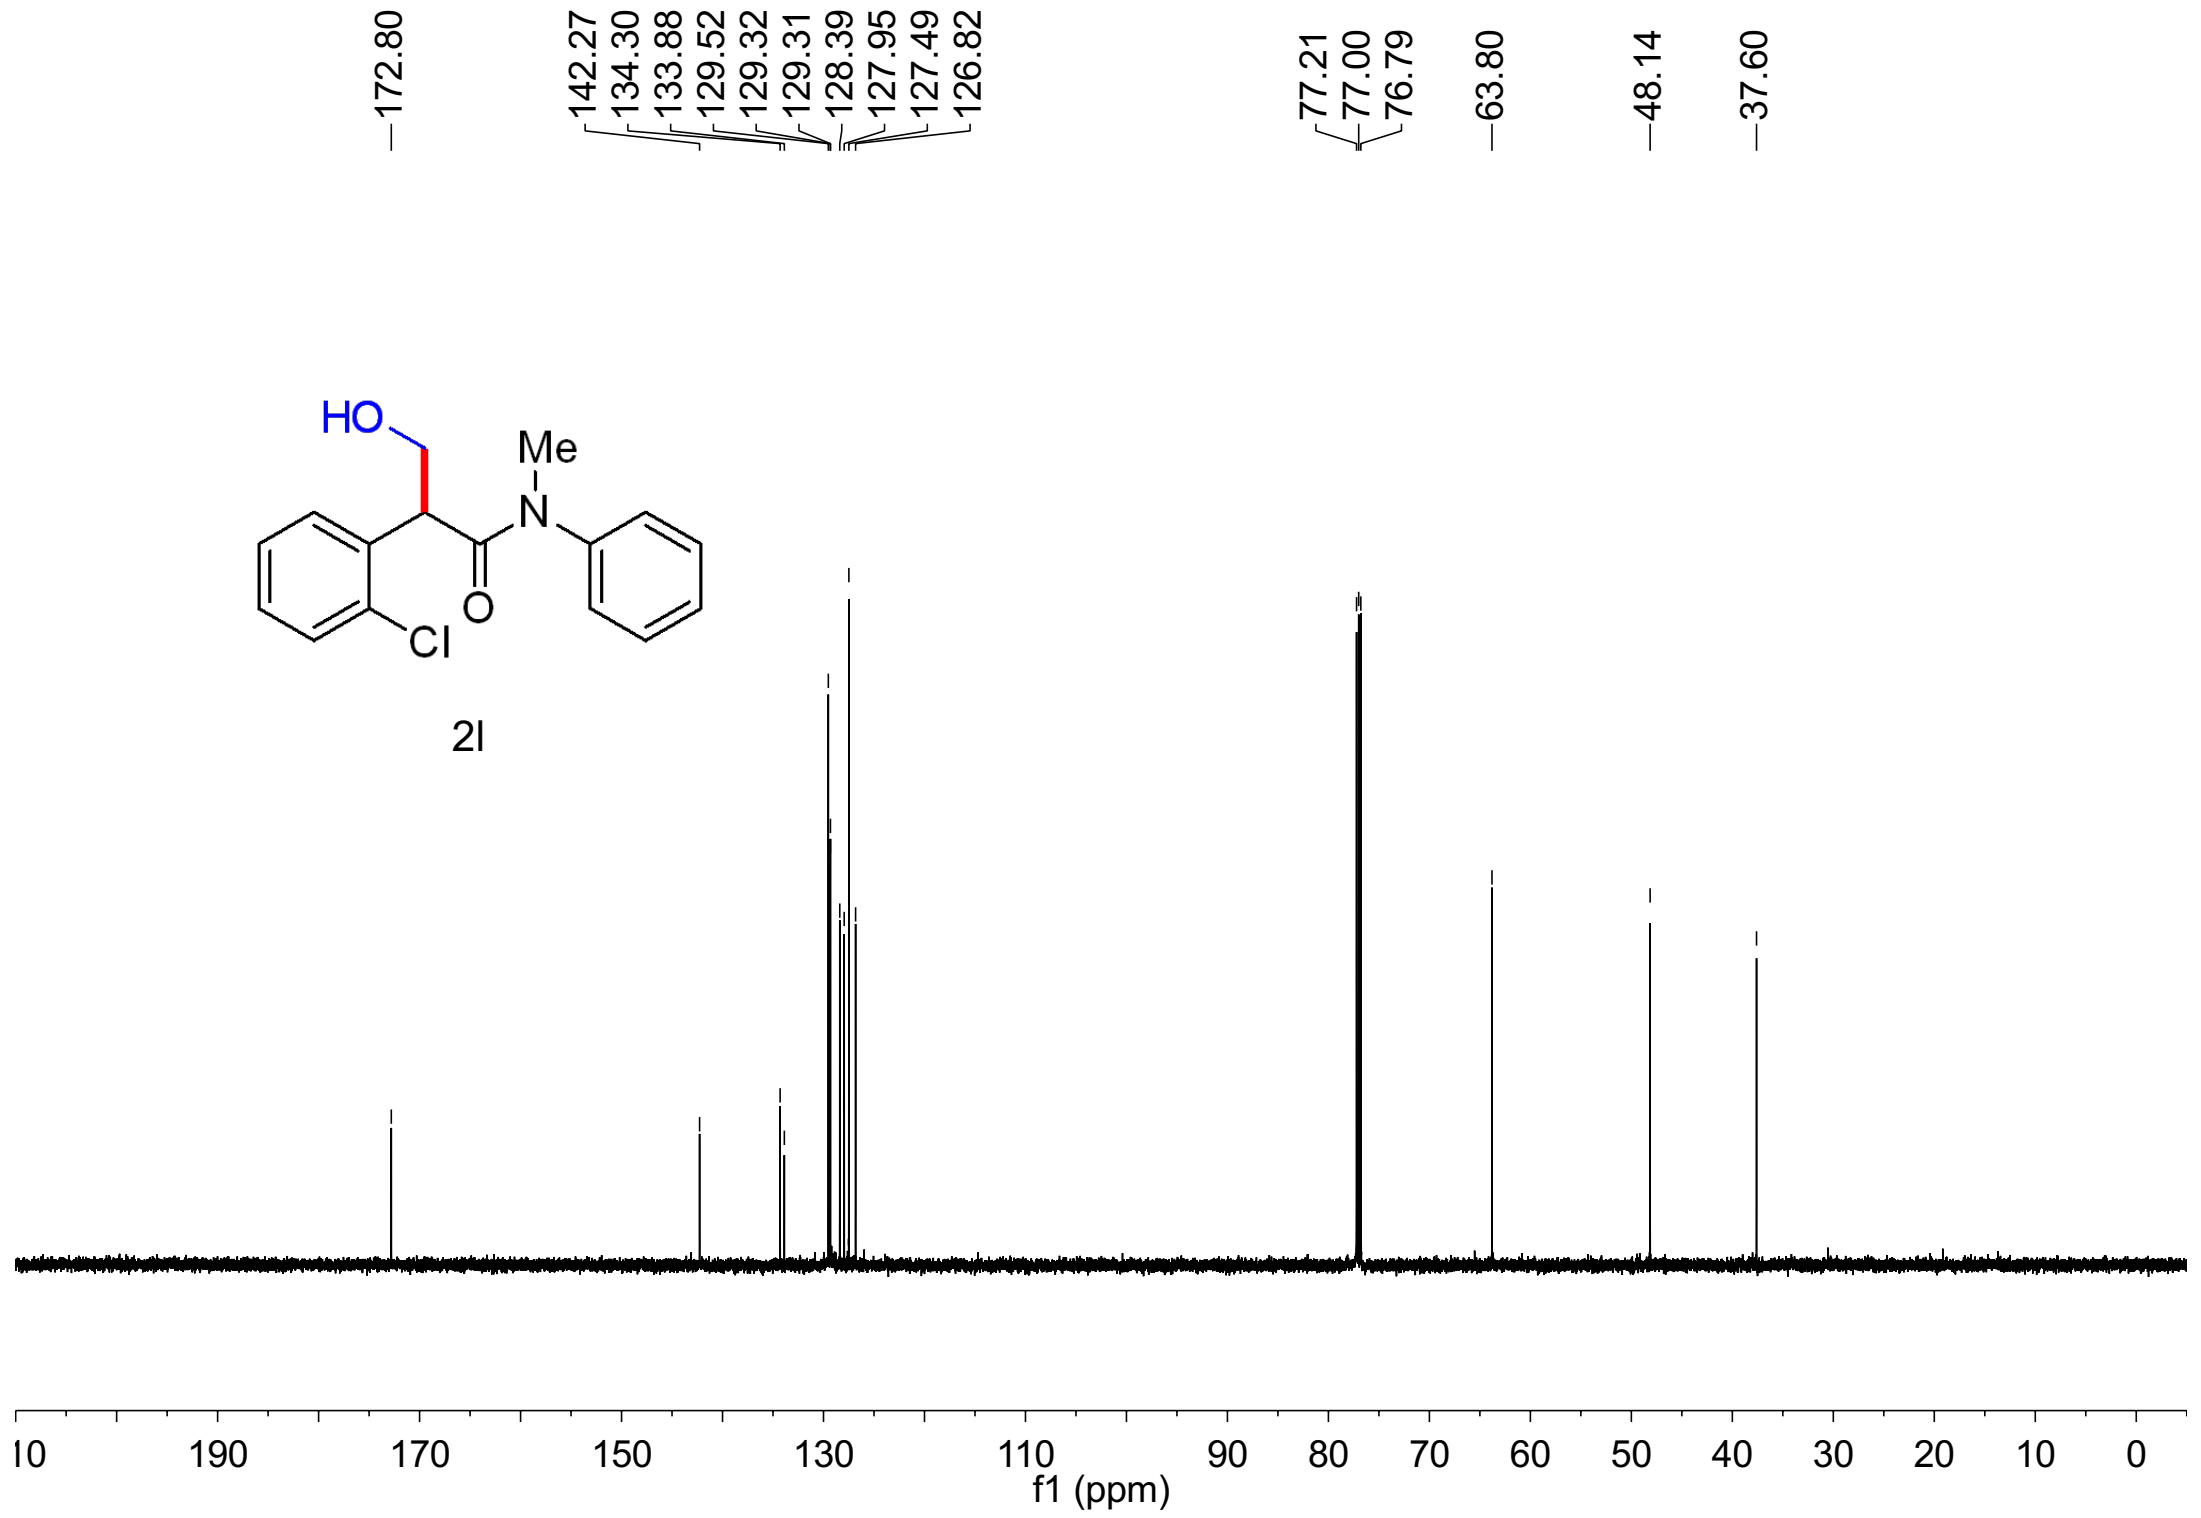

7.413  
7.410  
7.394  
7.390  
7.338  
7.335  
7.318  
7.315  
7.269  
7.260  
7.250  
7.246  
7.235  
7.232  
7.224  
7.208  
7.070  
7.051  
7.031  
6.766  
4.241  
4.231  
4.222  
4.212  
3.903  
3.884  
3.875  
3.867  
3.858  
3.856  
3.839  
3.761  
3.751  
3.742  
3.733  
3.723  
3.714  
3.704  
3.298  
3.274

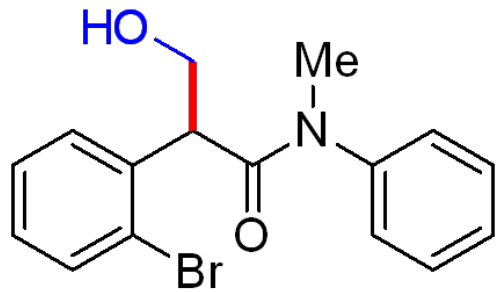

2m

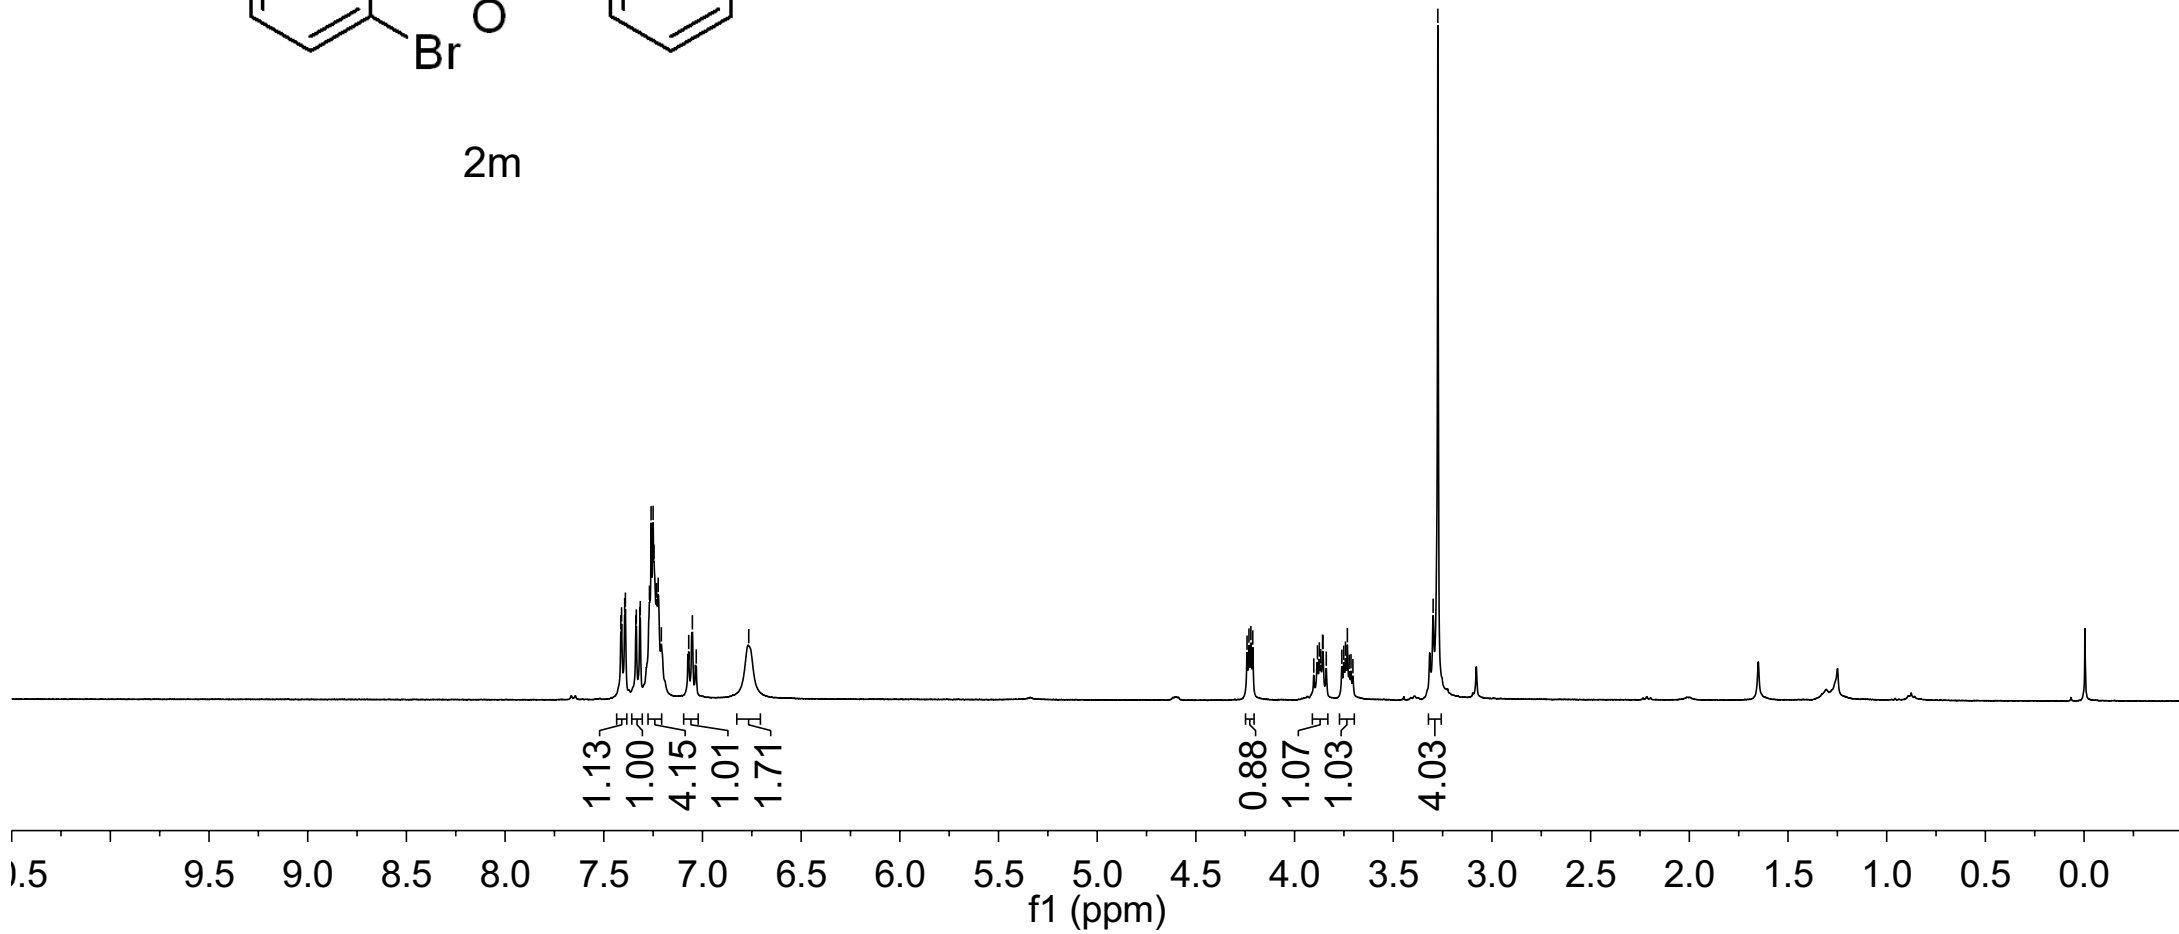

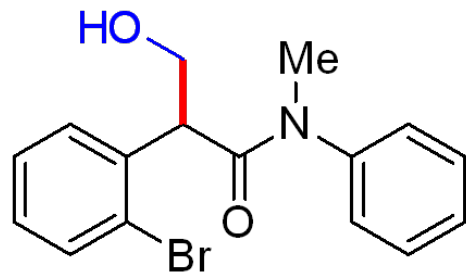

2m

—172.79

142.26

136.00

132.73

129.64

129.37

128.64

128.01

127.55

127.47

124.73

77.21

77.00

76.79

—63.81

—50.85

—37.66





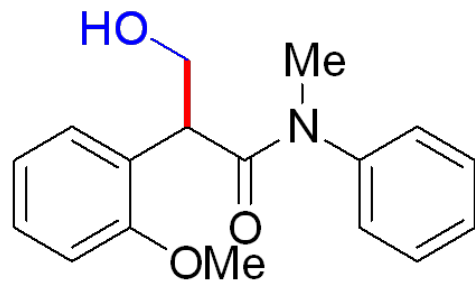

2n

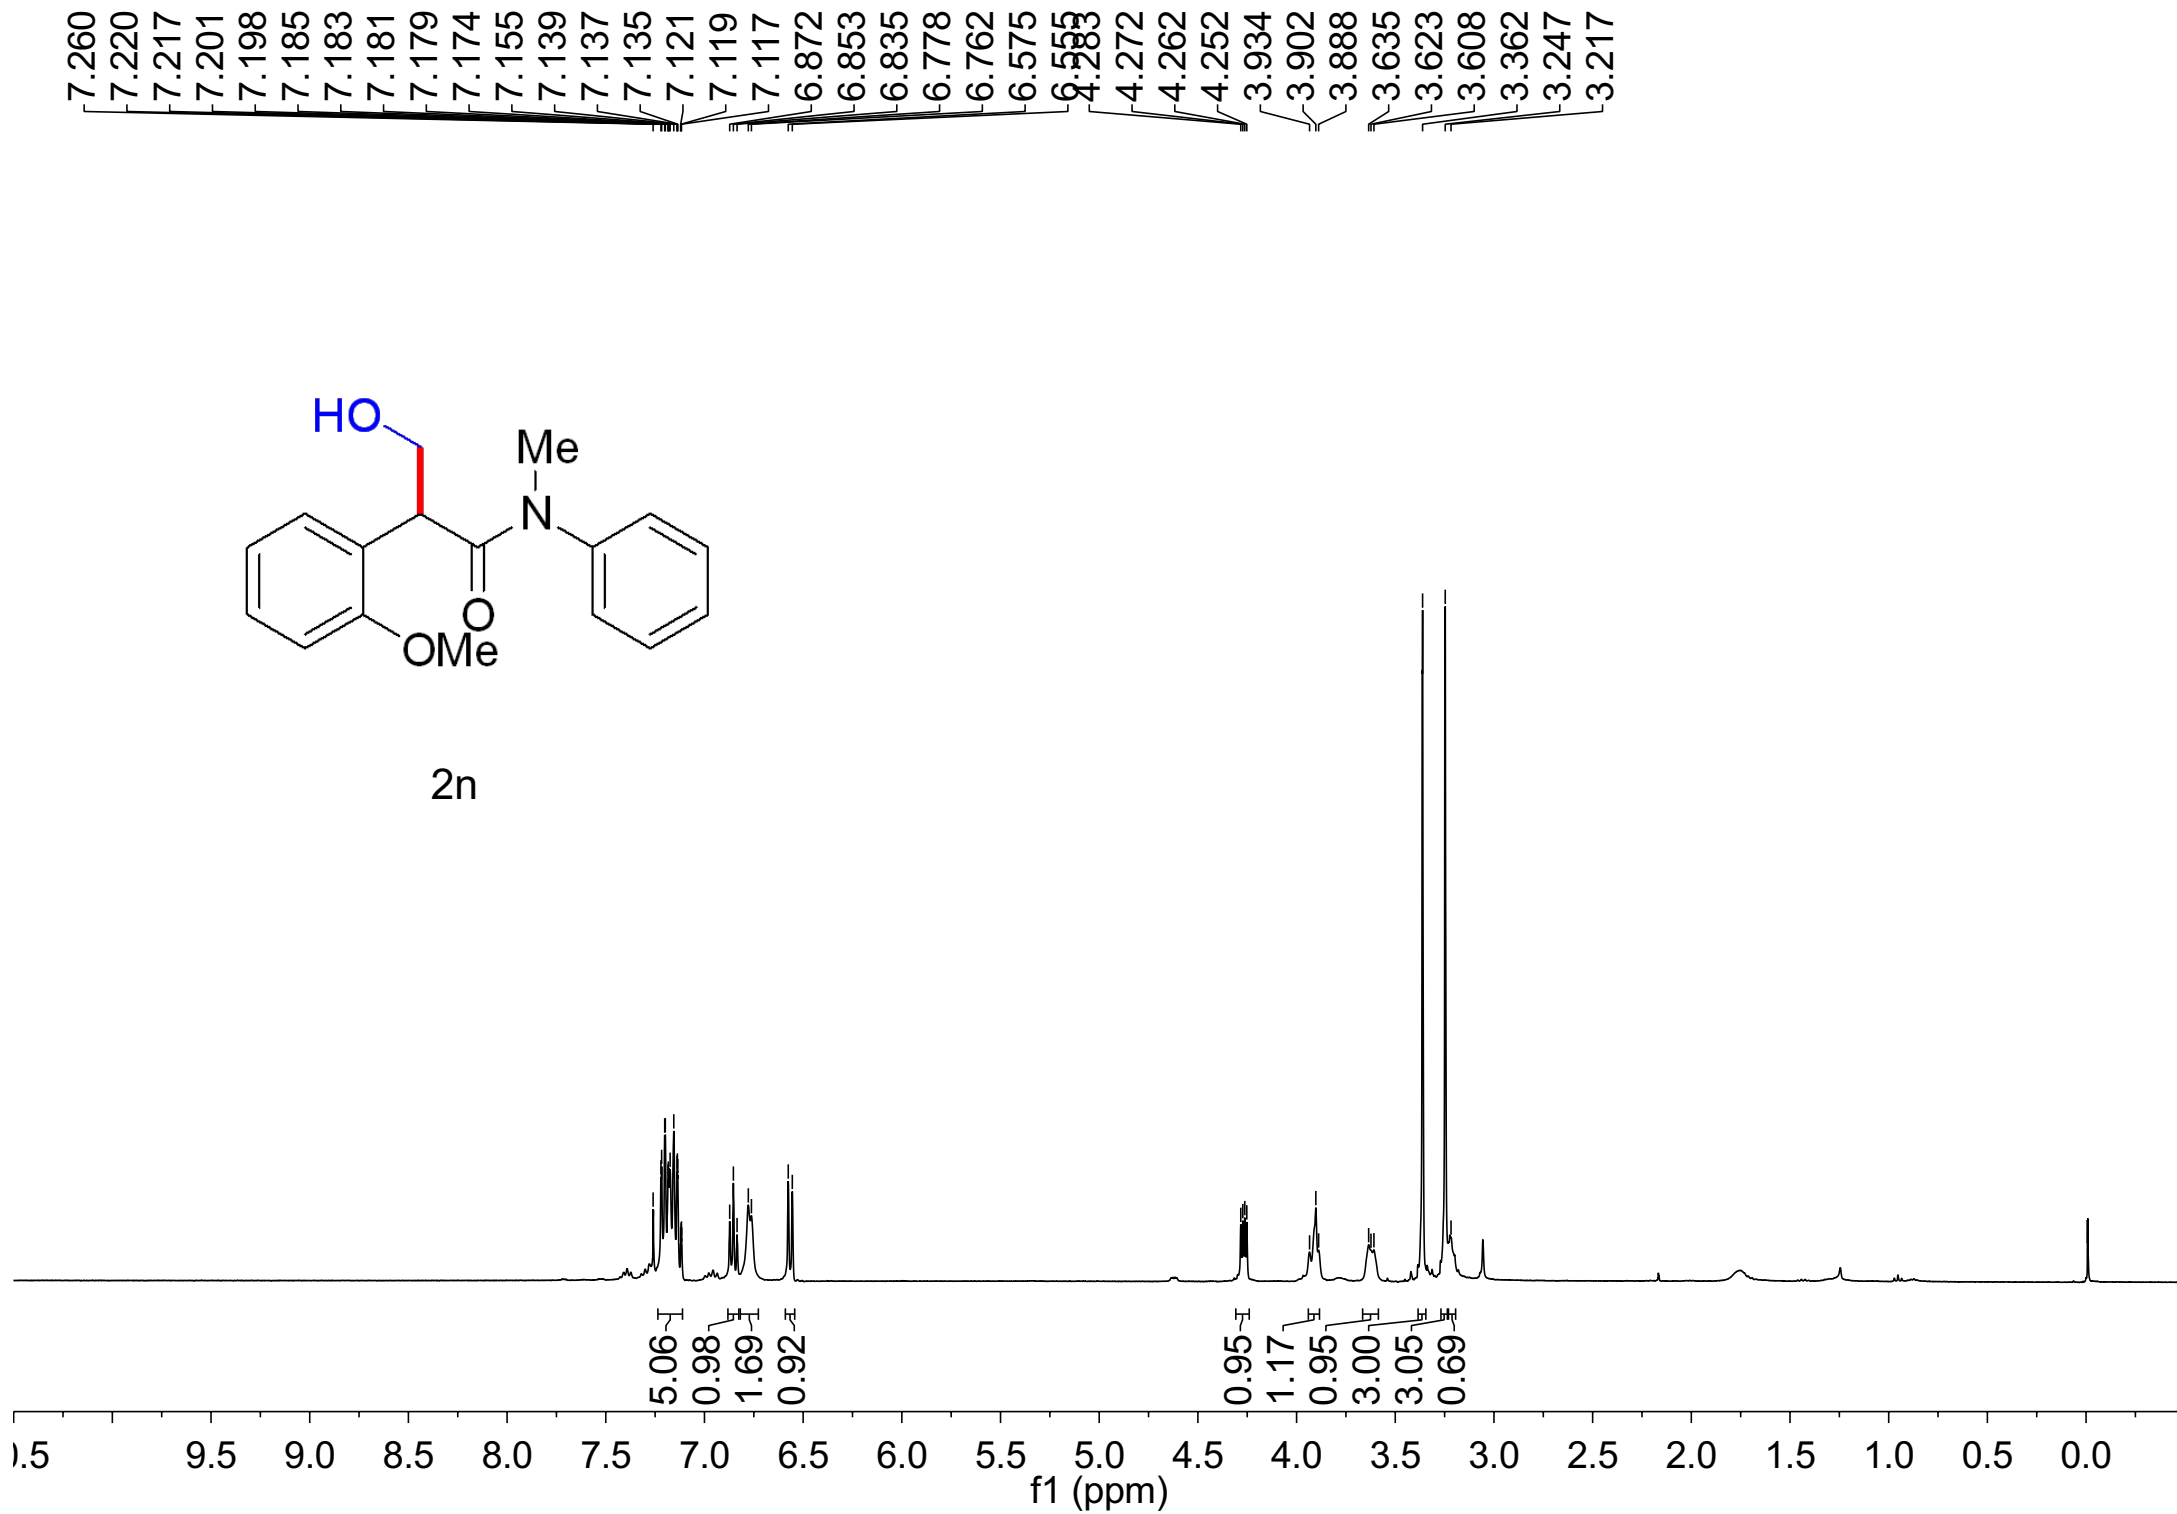

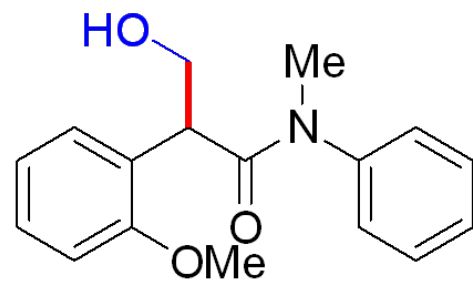

2n

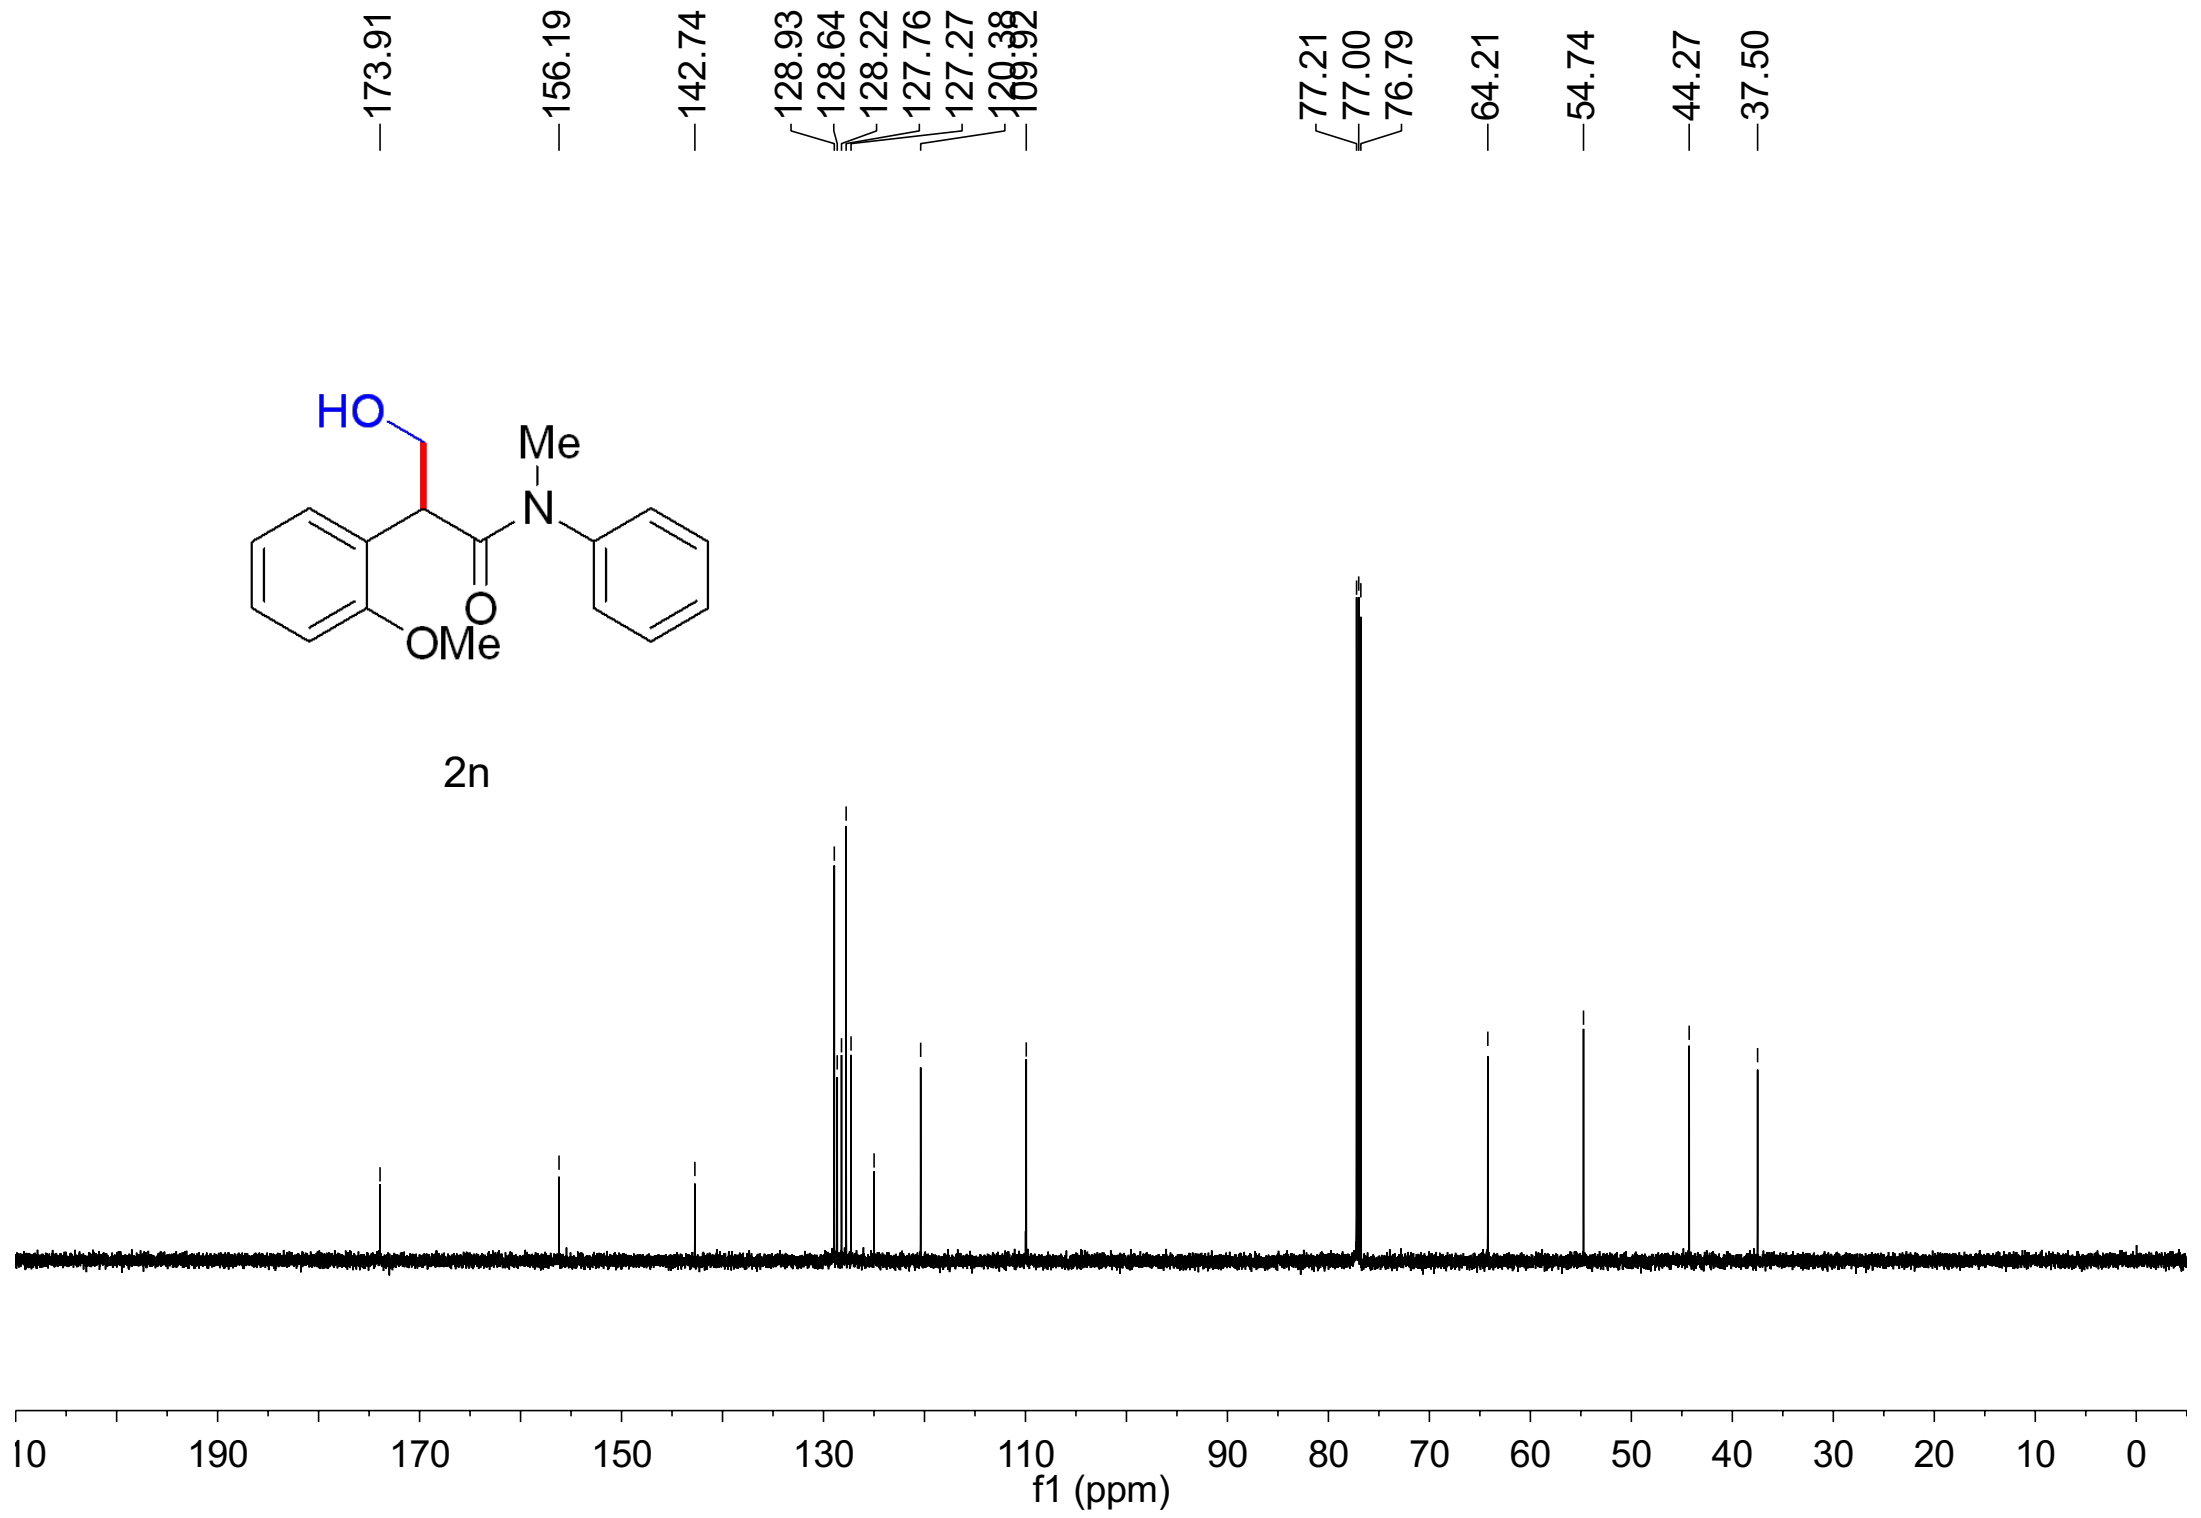

7.300  
7.295  
7.279  
7.277  
7.260  
7.242  
7.233  
7.229  
7.223  
7.207  
7.201  
7.188  
7.185  
7.167  
7.133  
6.865  
6.844  
6.815  
6.767  
6.747  
4.053  
4.027  
4.005  
3.704  
3.693  
3.684  
3.672  
3.636  
3.624  
3.604  
3.227  
3.182

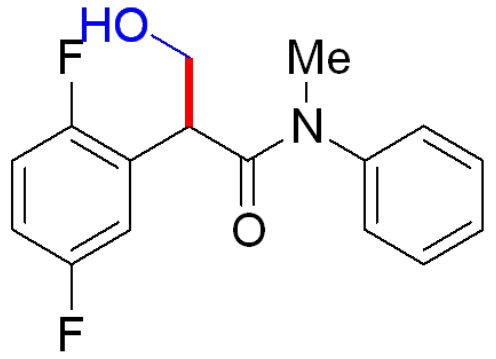

2o

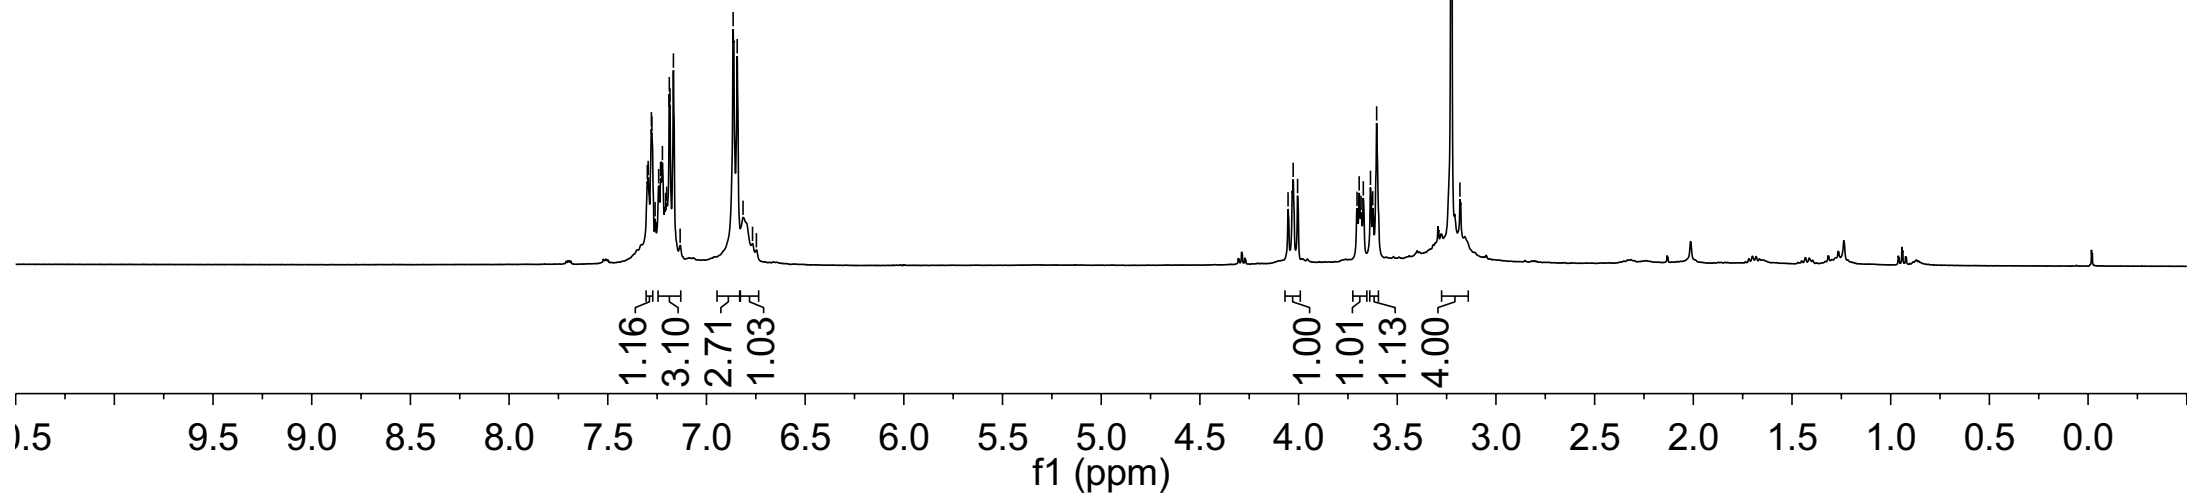

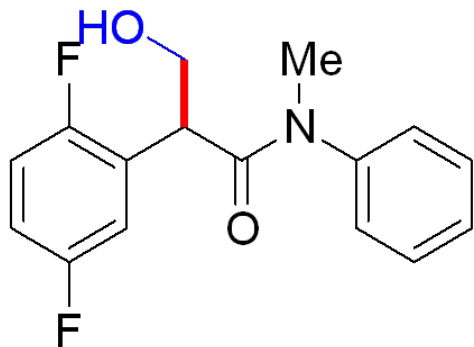

2o

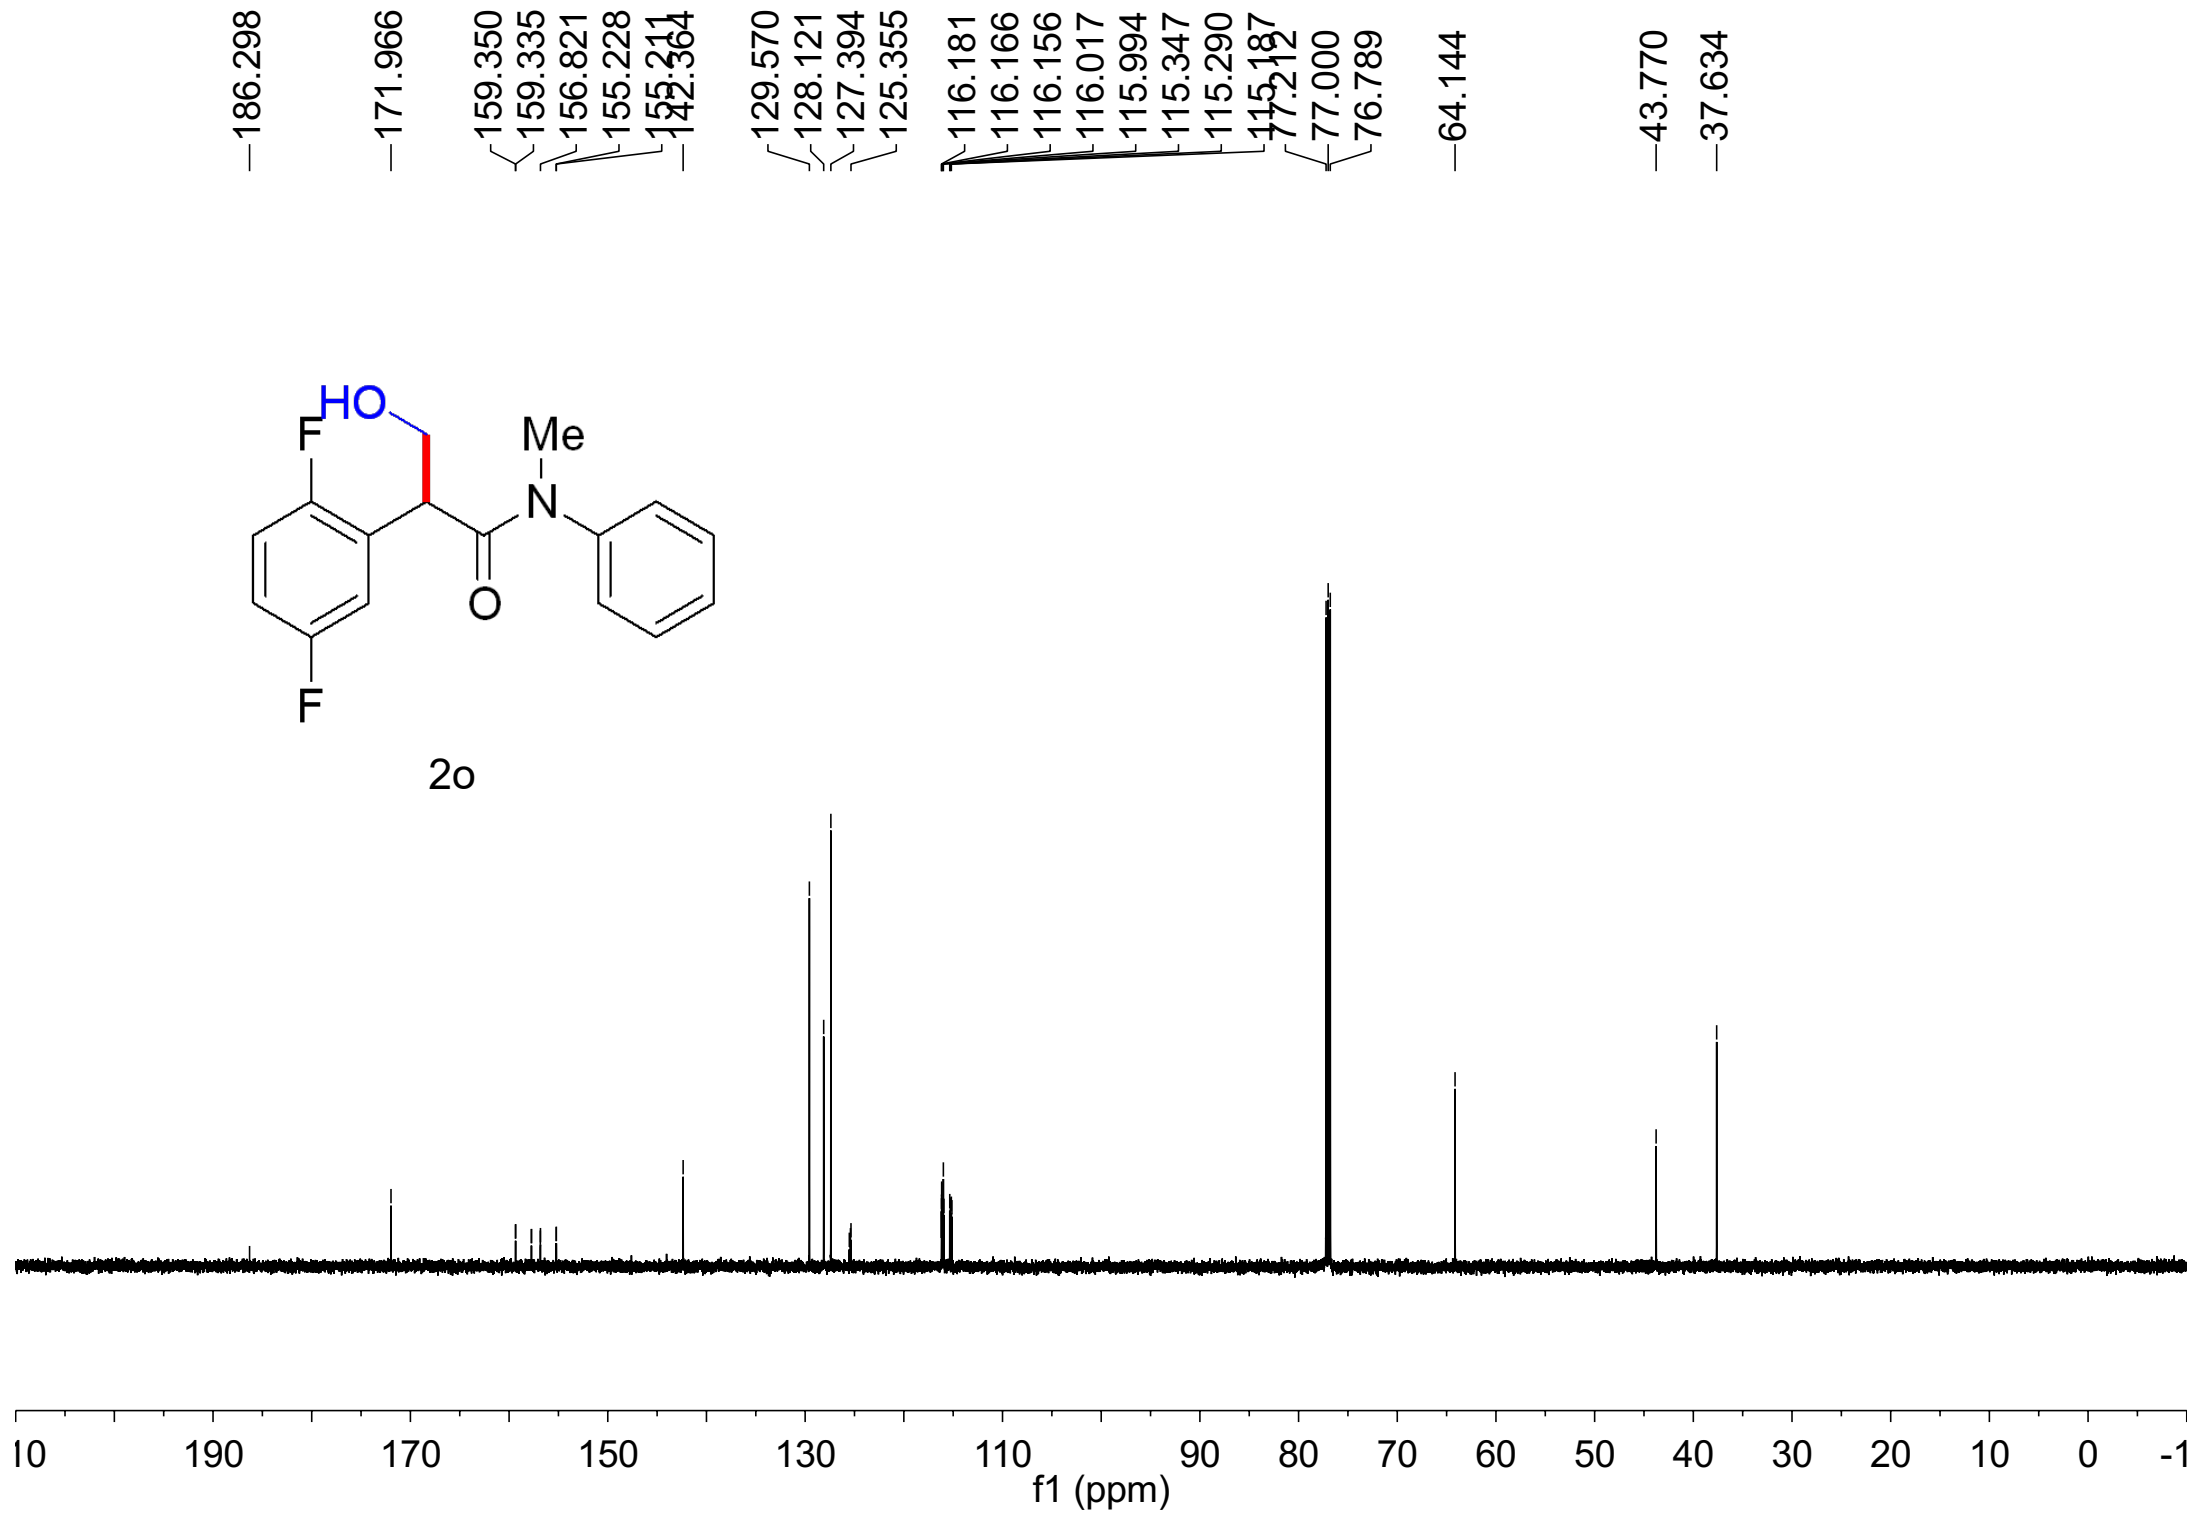

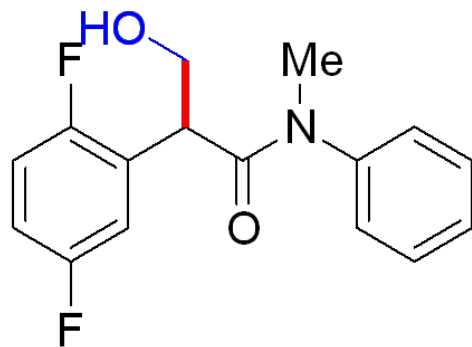

2o

118.643  
118.656  
118.665  
118.677  
118.688  
118.701  
118.712  
118.724  
118.733  
118.745  
125.124  
125.137  
125.148  
125.160  
125.172  
125.183  
125.195  
125.207  
125.219

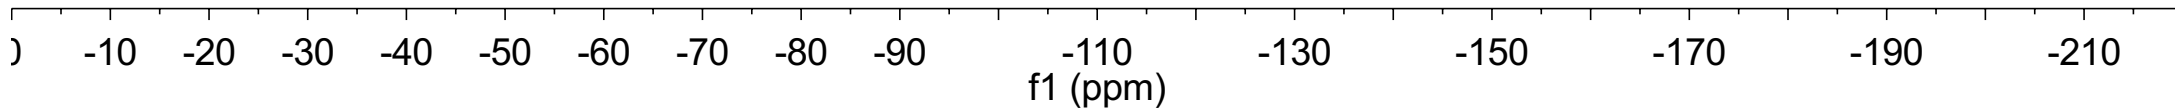

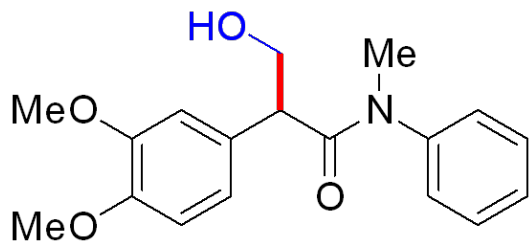

2p

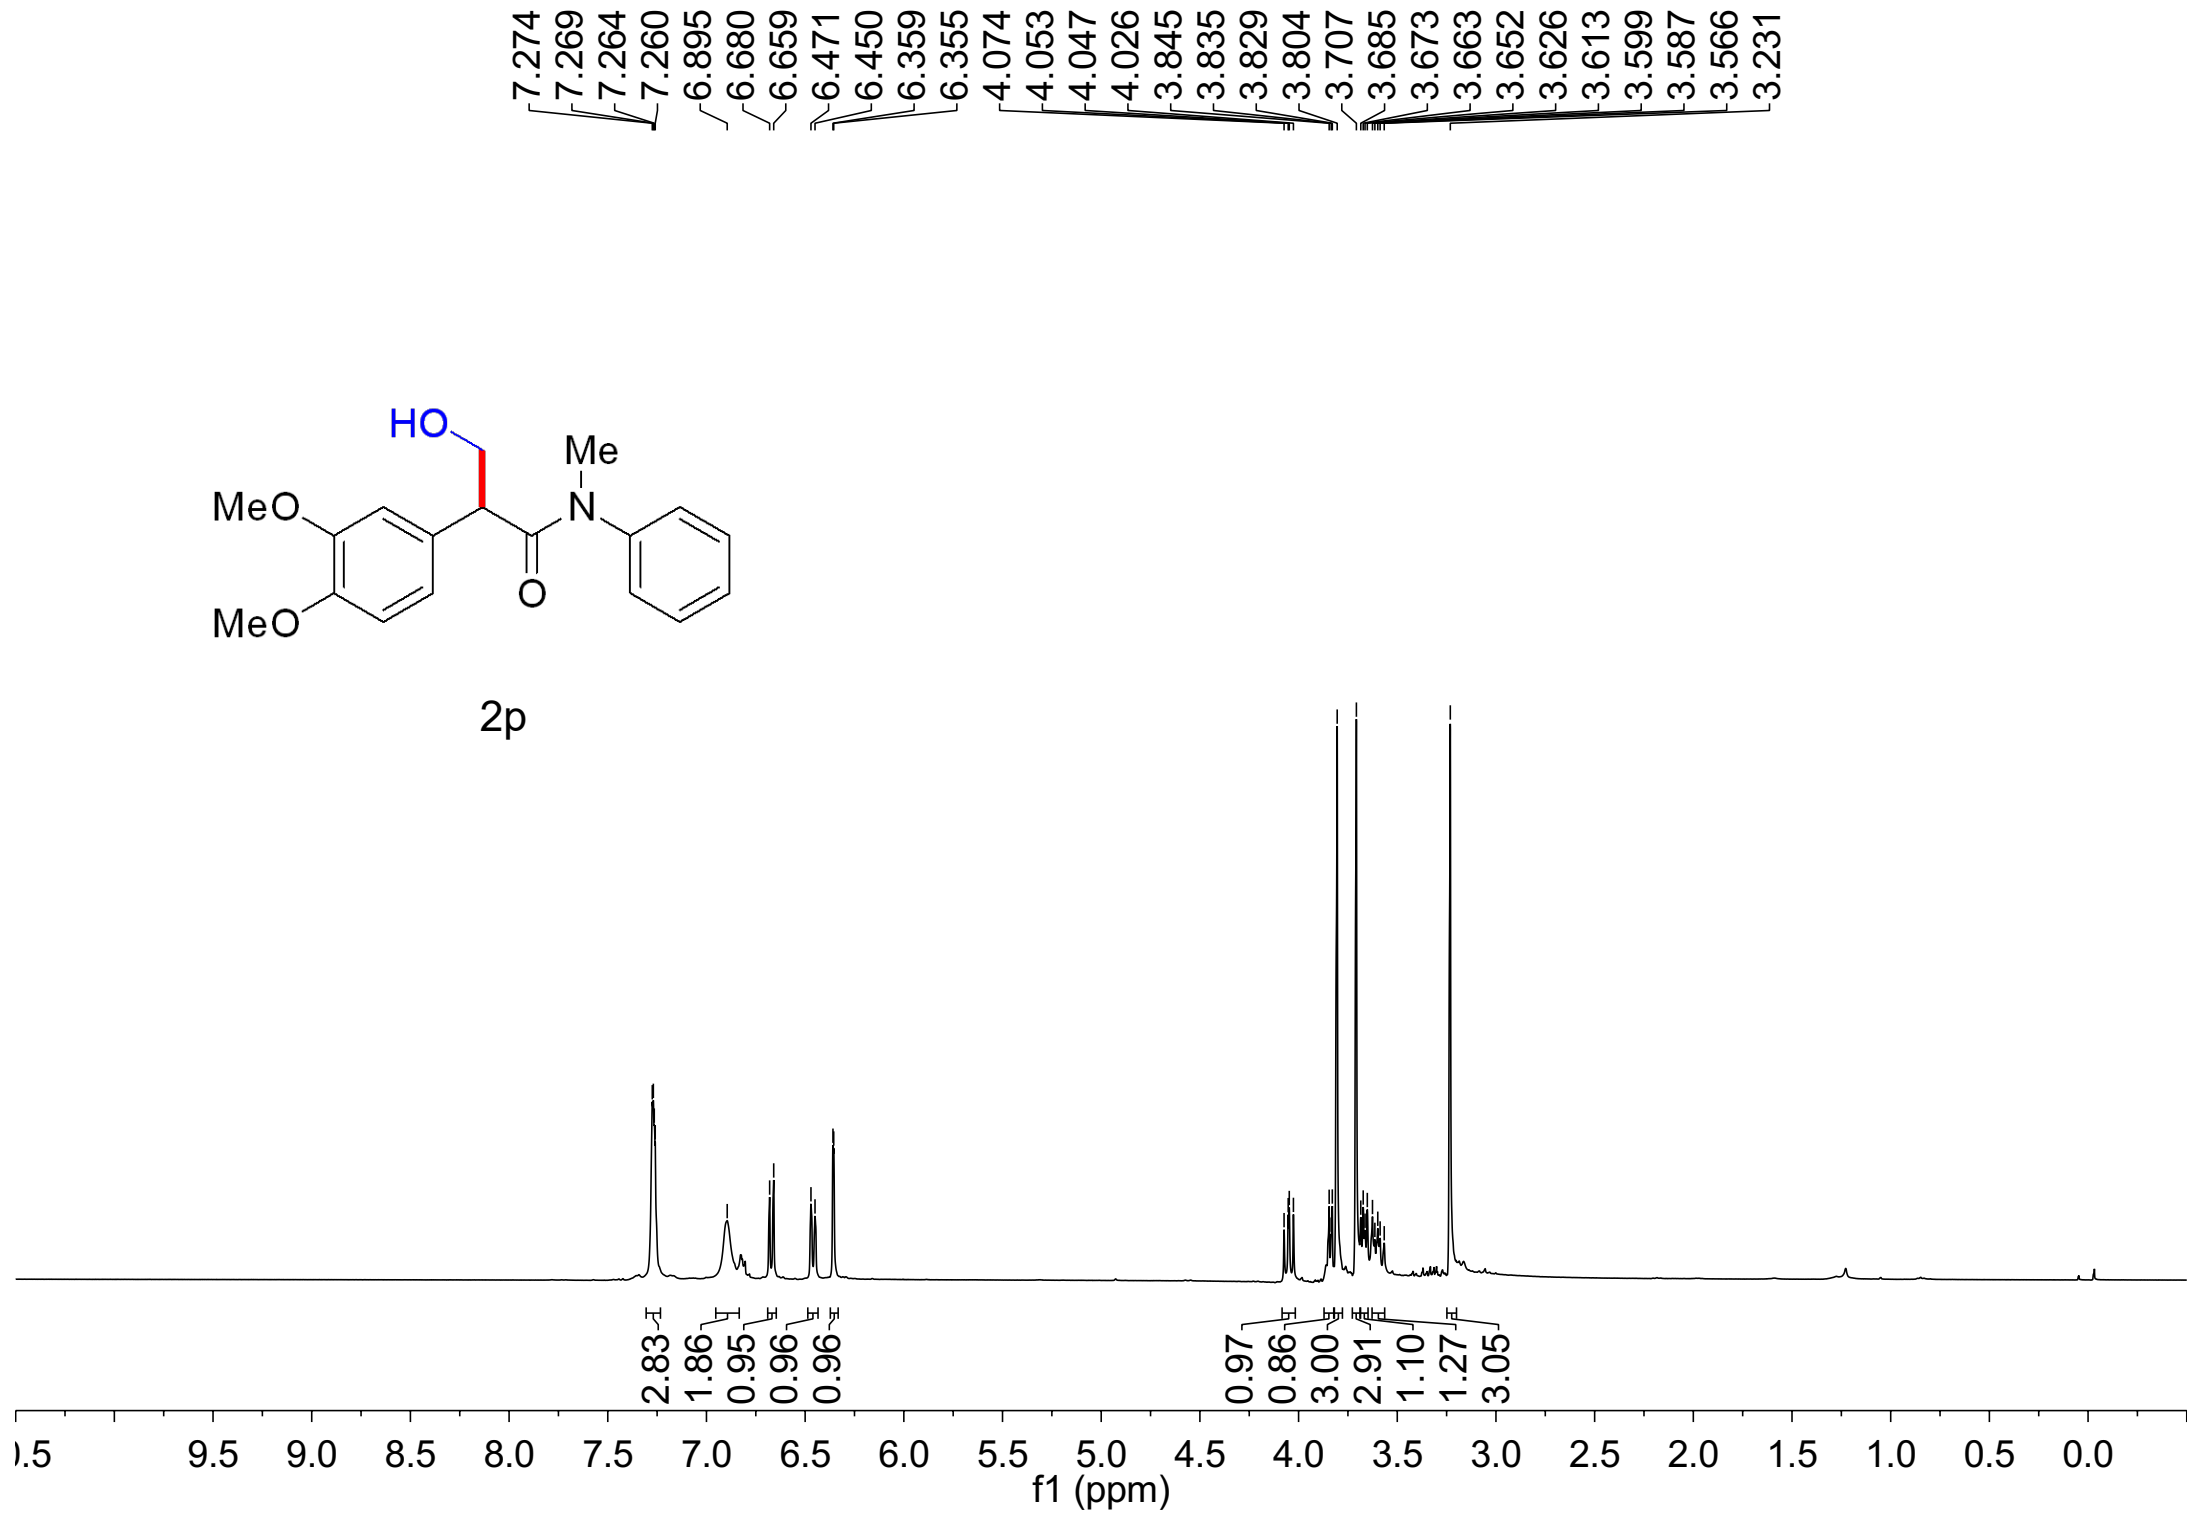

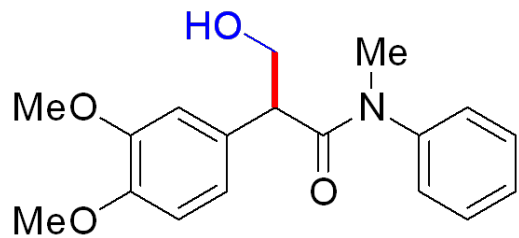

2p

—172.70

148.68

148.04

142.91

129.30

128.92

127.91

127.78

120.20

111.26

111.00

77.21

77.00

76.79

—65.51

55.75

55.63

51.39

—37.51

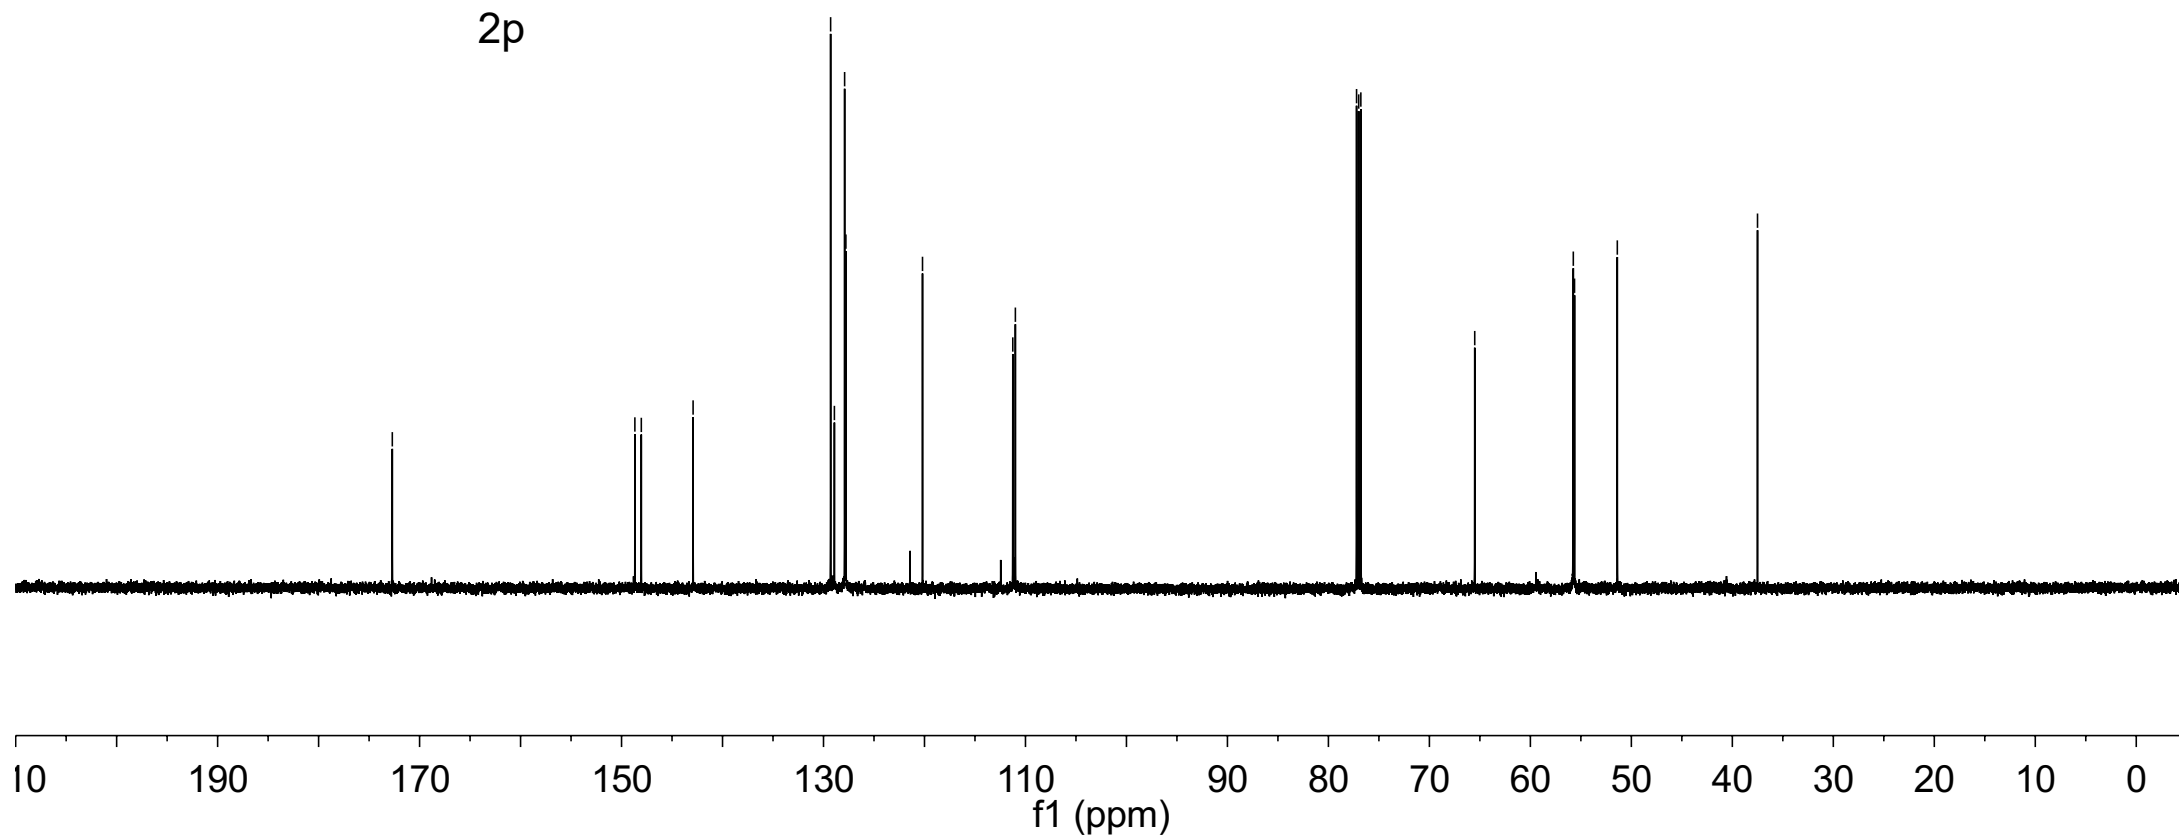

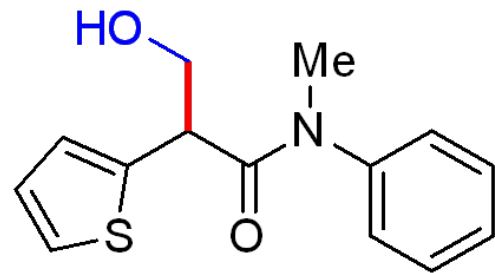

2q

7.379  
7.370  
7.357  
7.340  
7.326  
7.310  
7.307  
7.260  
7.131  
7.118  
7.072  
7.057  
6.863  
6.855  
6.851  
6.842  
6.640  
6.632  
4.097  
4.077  
4.072  
4.051  
4.043  
4.031  
4.022  
3.746  
3.725  
3.720  
3.705  
3.699  
3.678  
3.273

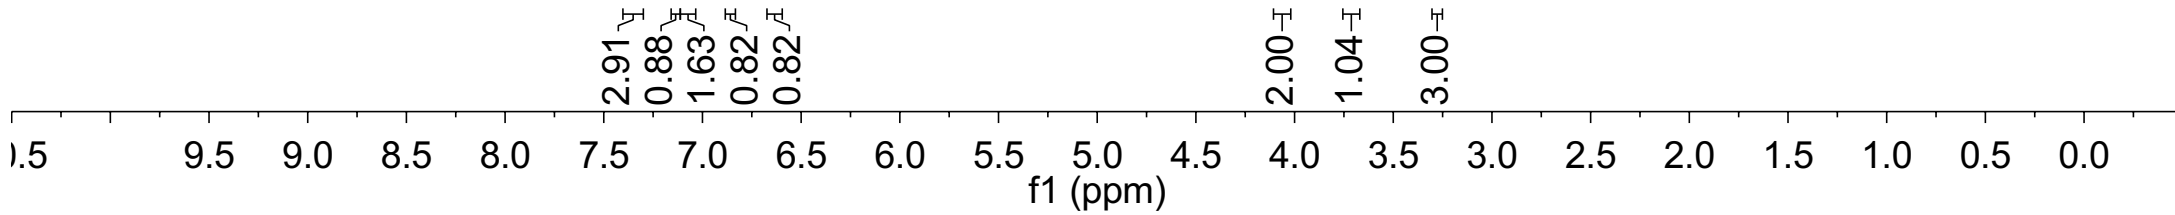



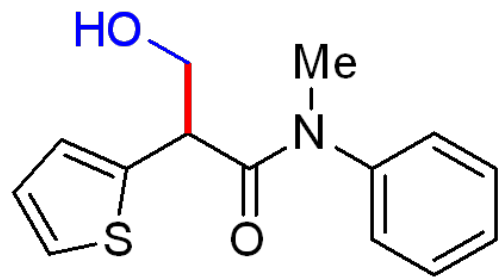

2q

—171.90

—142.91

—138.26

129.57

128.01

127.55

126.41

125.75

124.74

77.21

77.00

76.79

—65.80

—46.31

—37.59

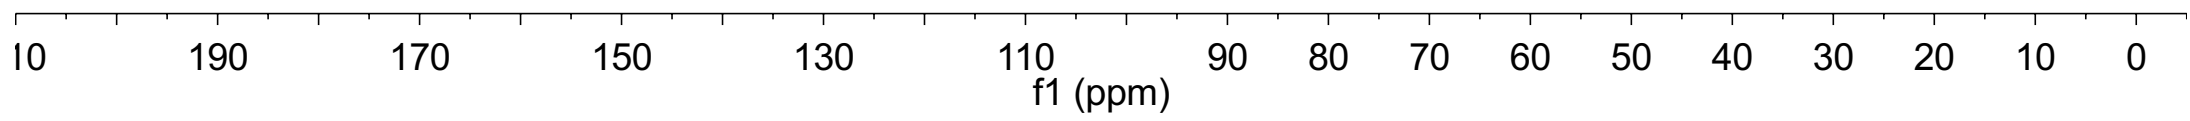

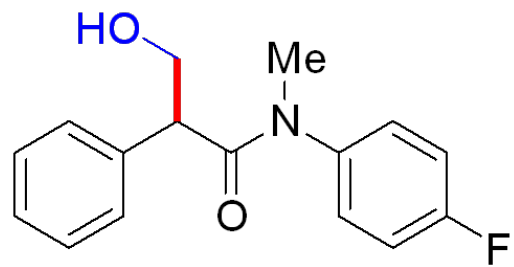

4a

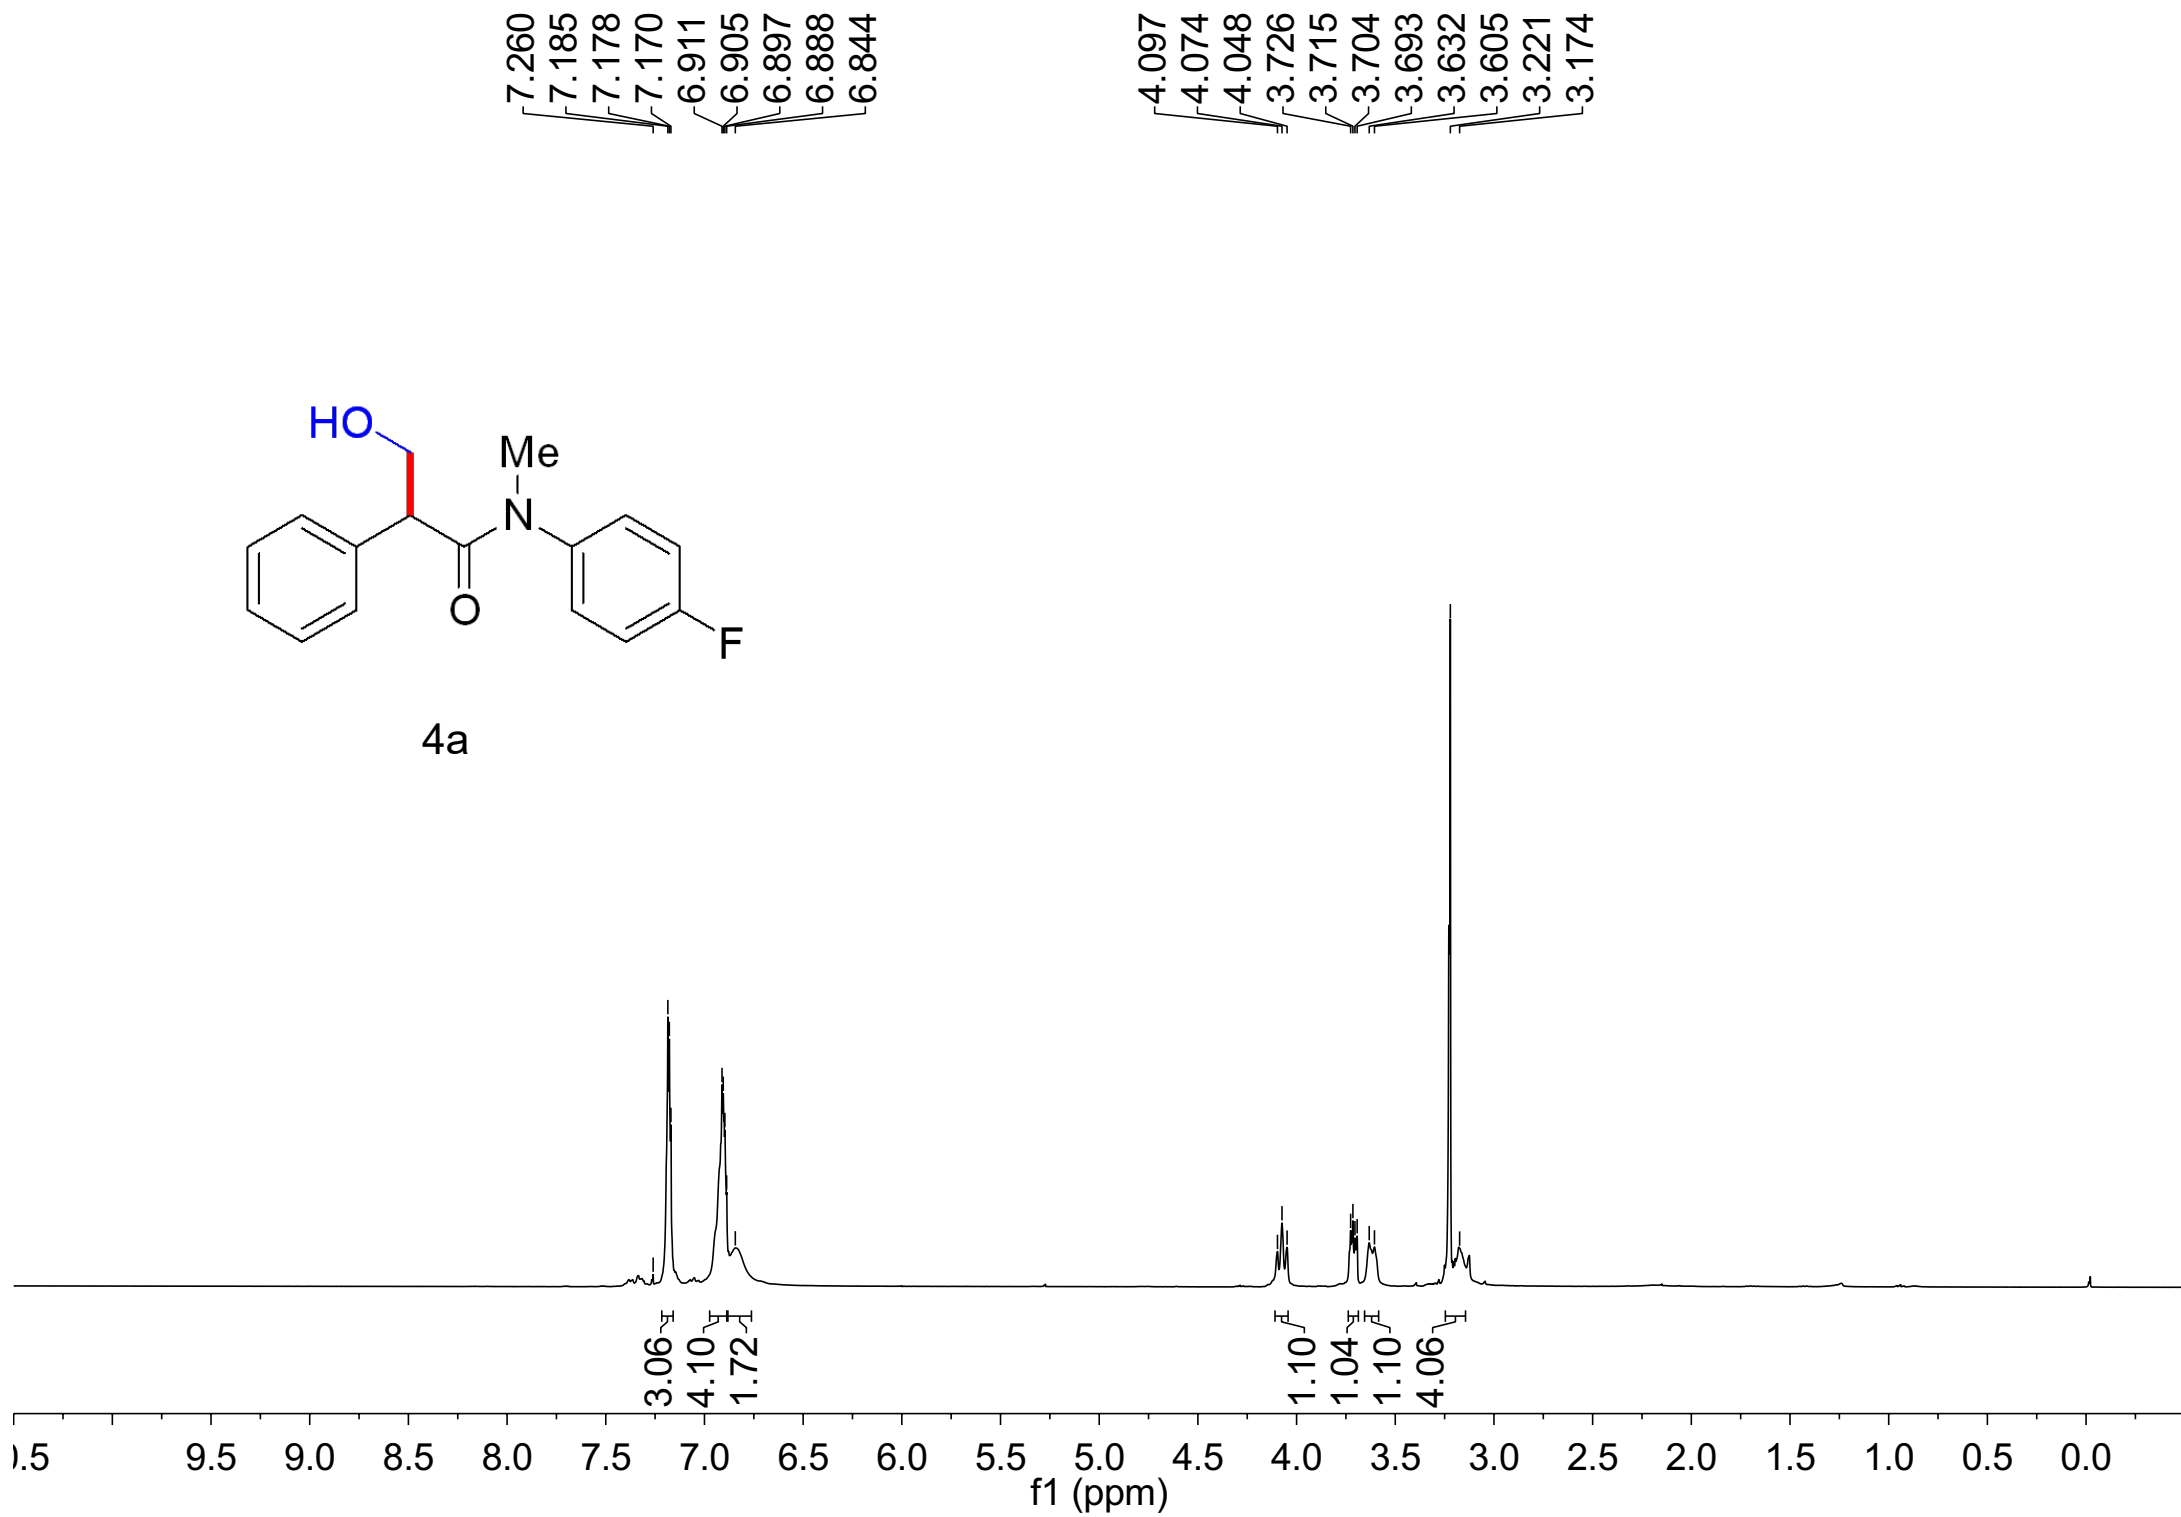

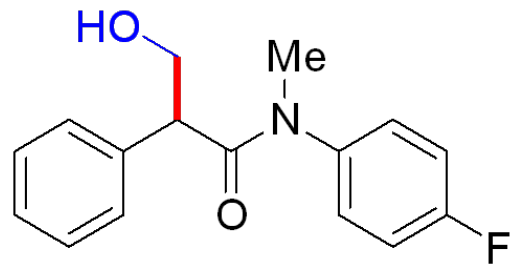

4a

172.637  
162.532  
160.885  
138.842  
138.821  
136.324  
129.685  
129.627  
128.496  
128.006  
127.194  
116.257  
116.106

77.212  
77.000  
76.788

65.554

52.143

37.652



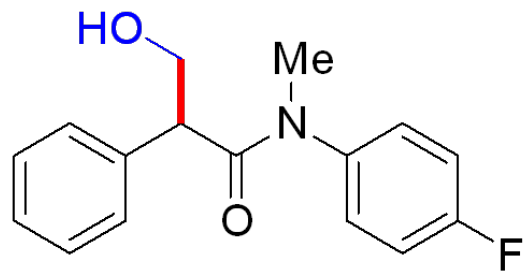

4a

113.402  
113.415  
113.424  
113.436  
113.449  
113.457  
113.470

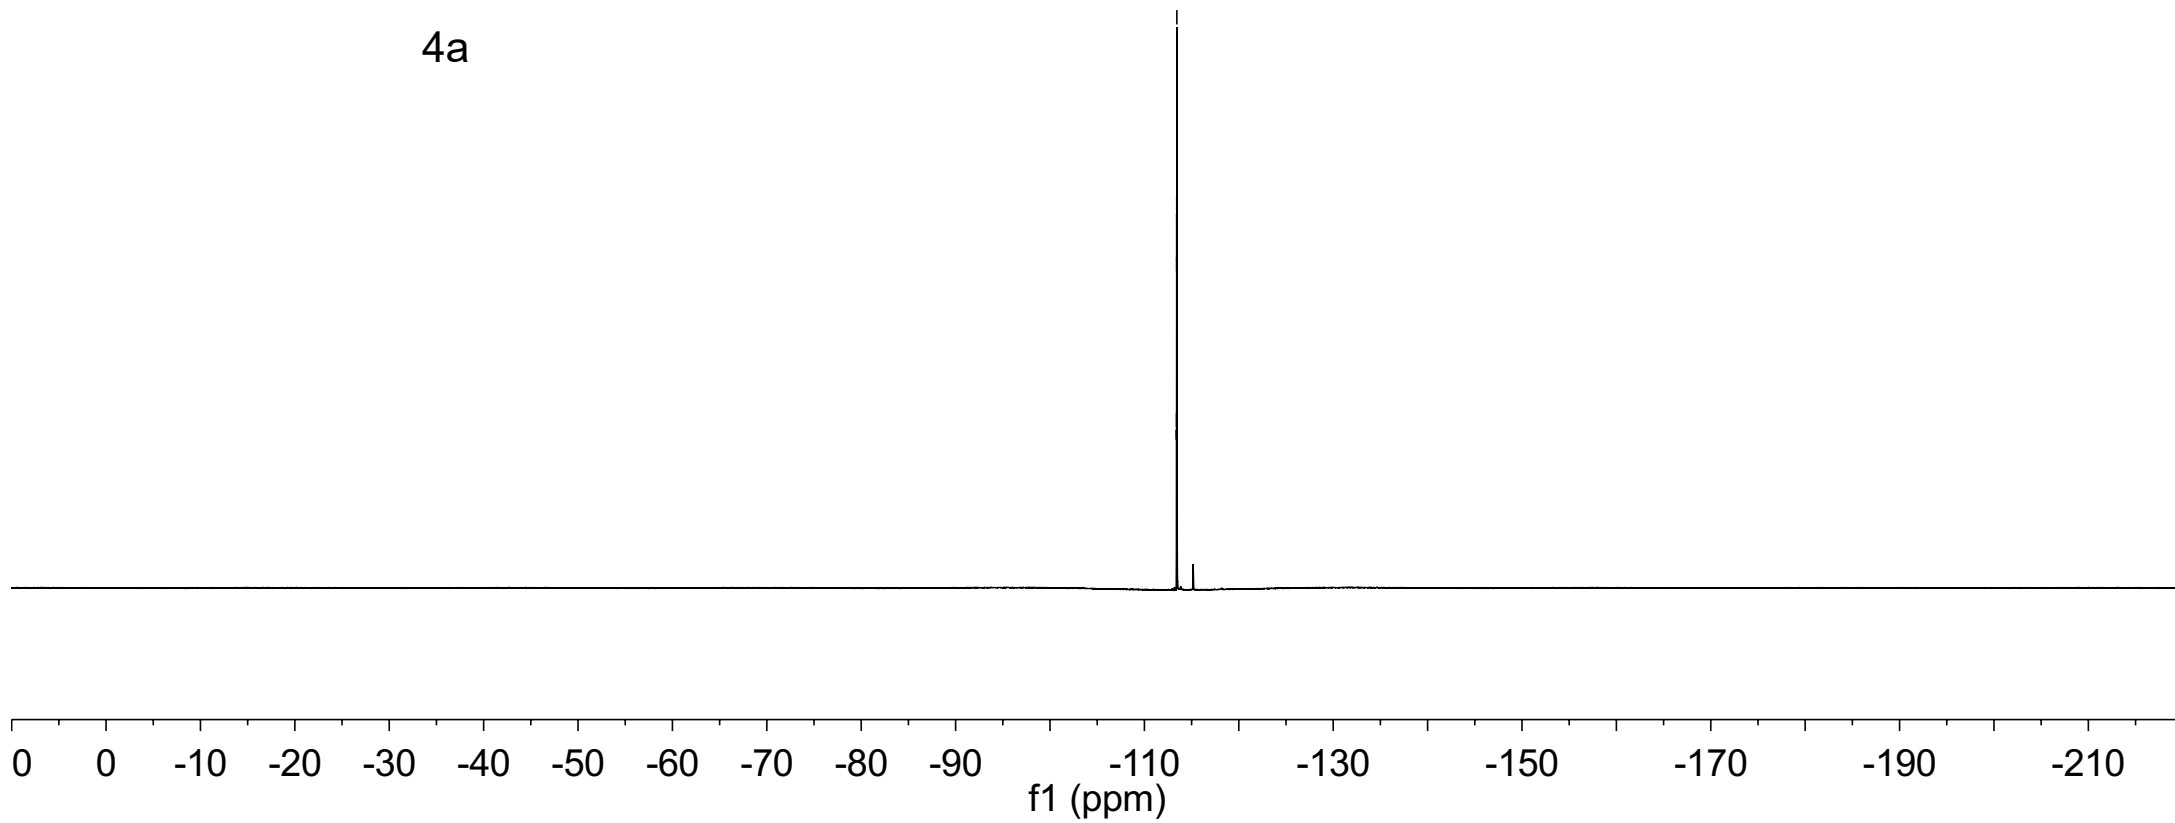

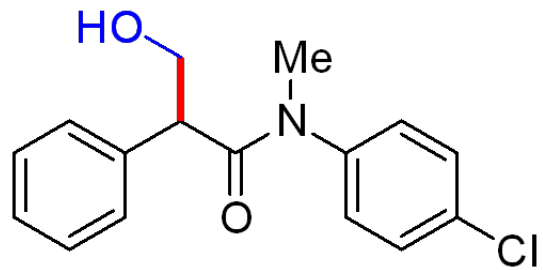

4b

7.260  
7.235  
7.212  
7.209  
7.202  
7.168  
7.148  
6.925  
6.921  
6.914  
6.912  
6.906  
6.810  
6.795

4.092  
4.068  
4.043  
3.737  
3.725  
3.715  
3.704  
3.662  
3.652  
3.635  
3.626  
3.236  
2.871

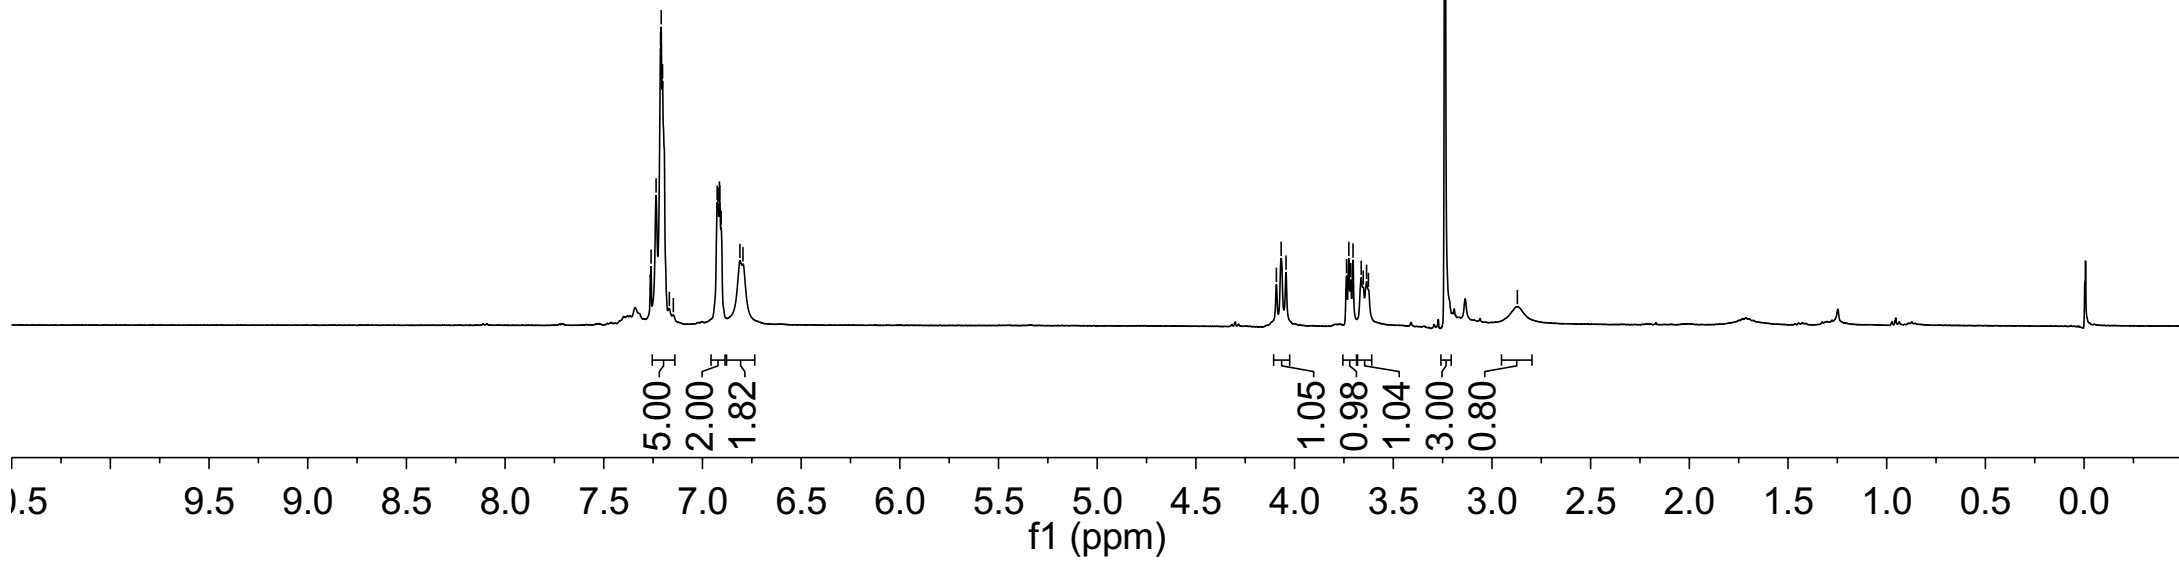

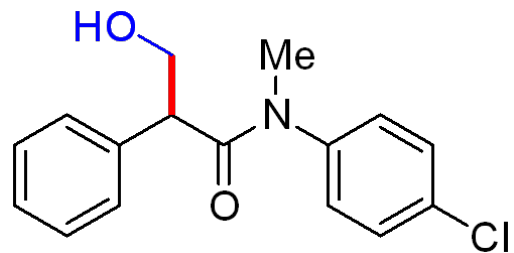

4b

172.51  
141.40  
136.26  
133.78  
129.55  
129.28  
128.59  
128.06  
127.30

77.21  
77.00  
76.79  
65.65  
52.19  
37.59



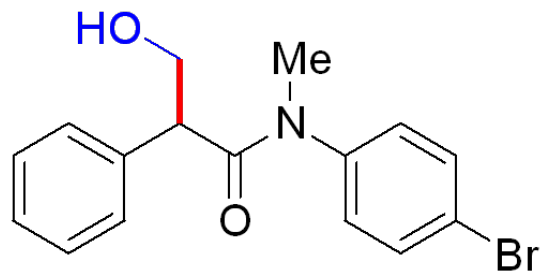

4c

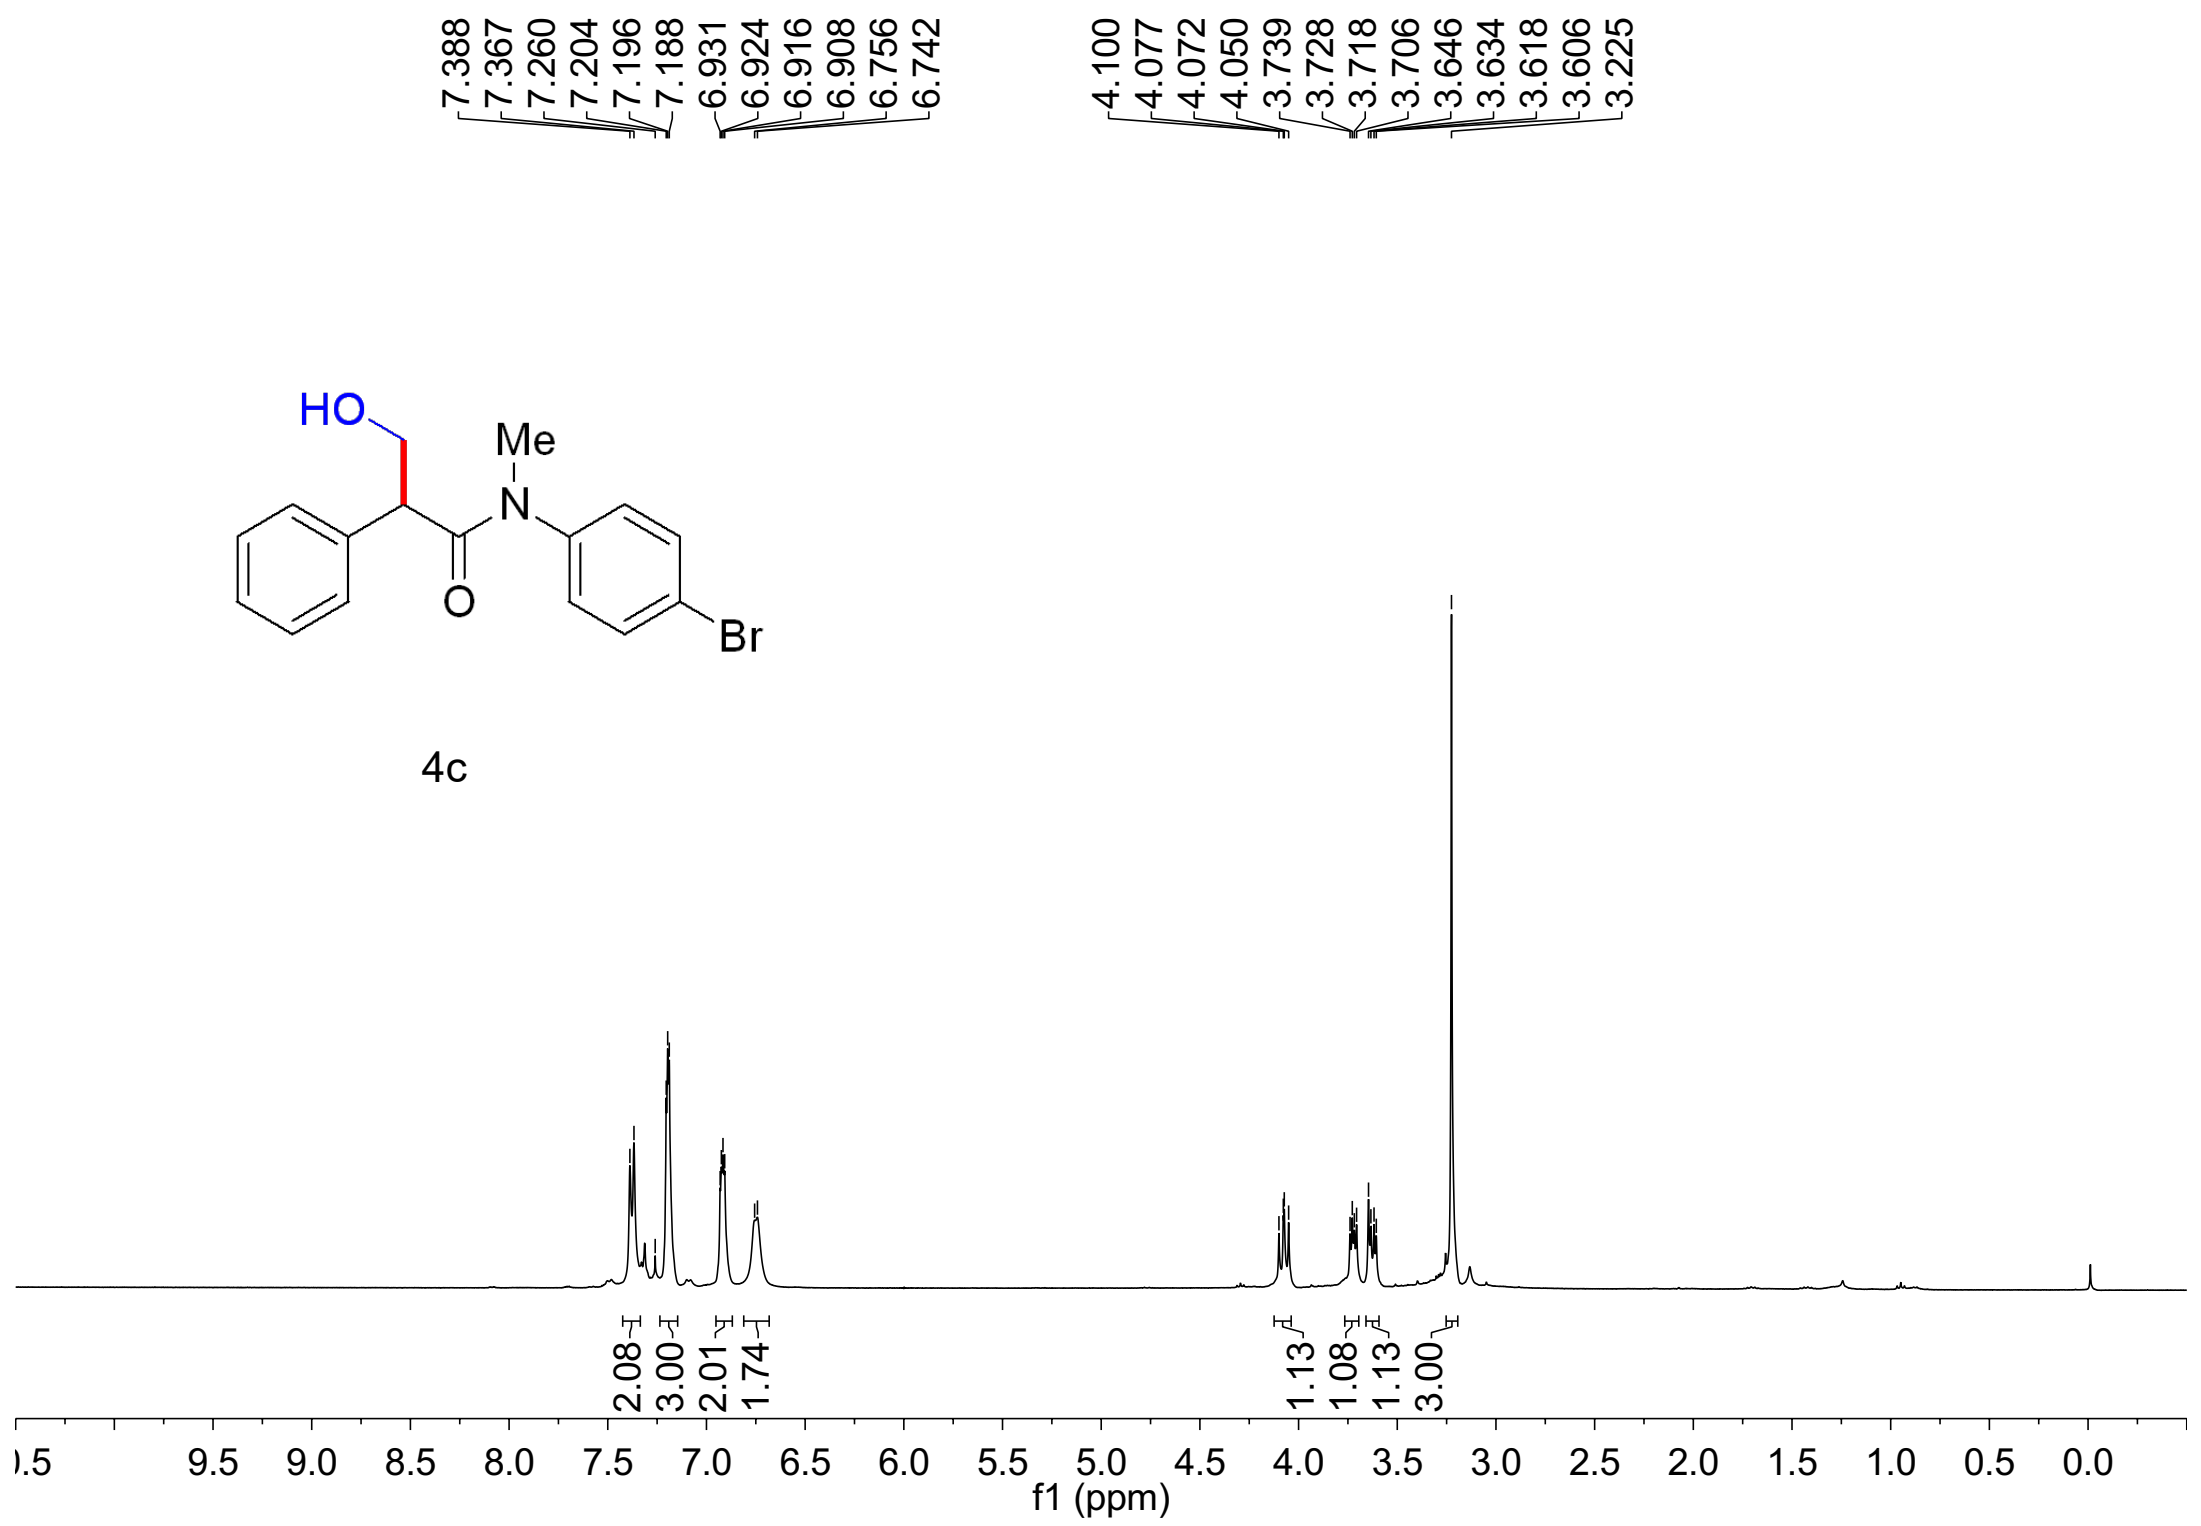

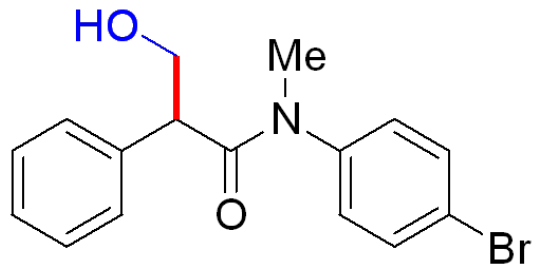

4c

172.44  
141.89  
136.20  
132.53  
129.59  
128.57  
128.03  
127.28  
121.72

77.21  
77.00  
76.79  
65.56  
52.14  
37.54





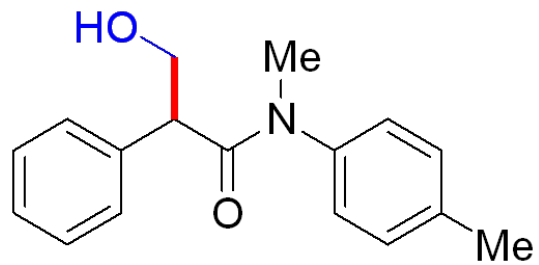

4d

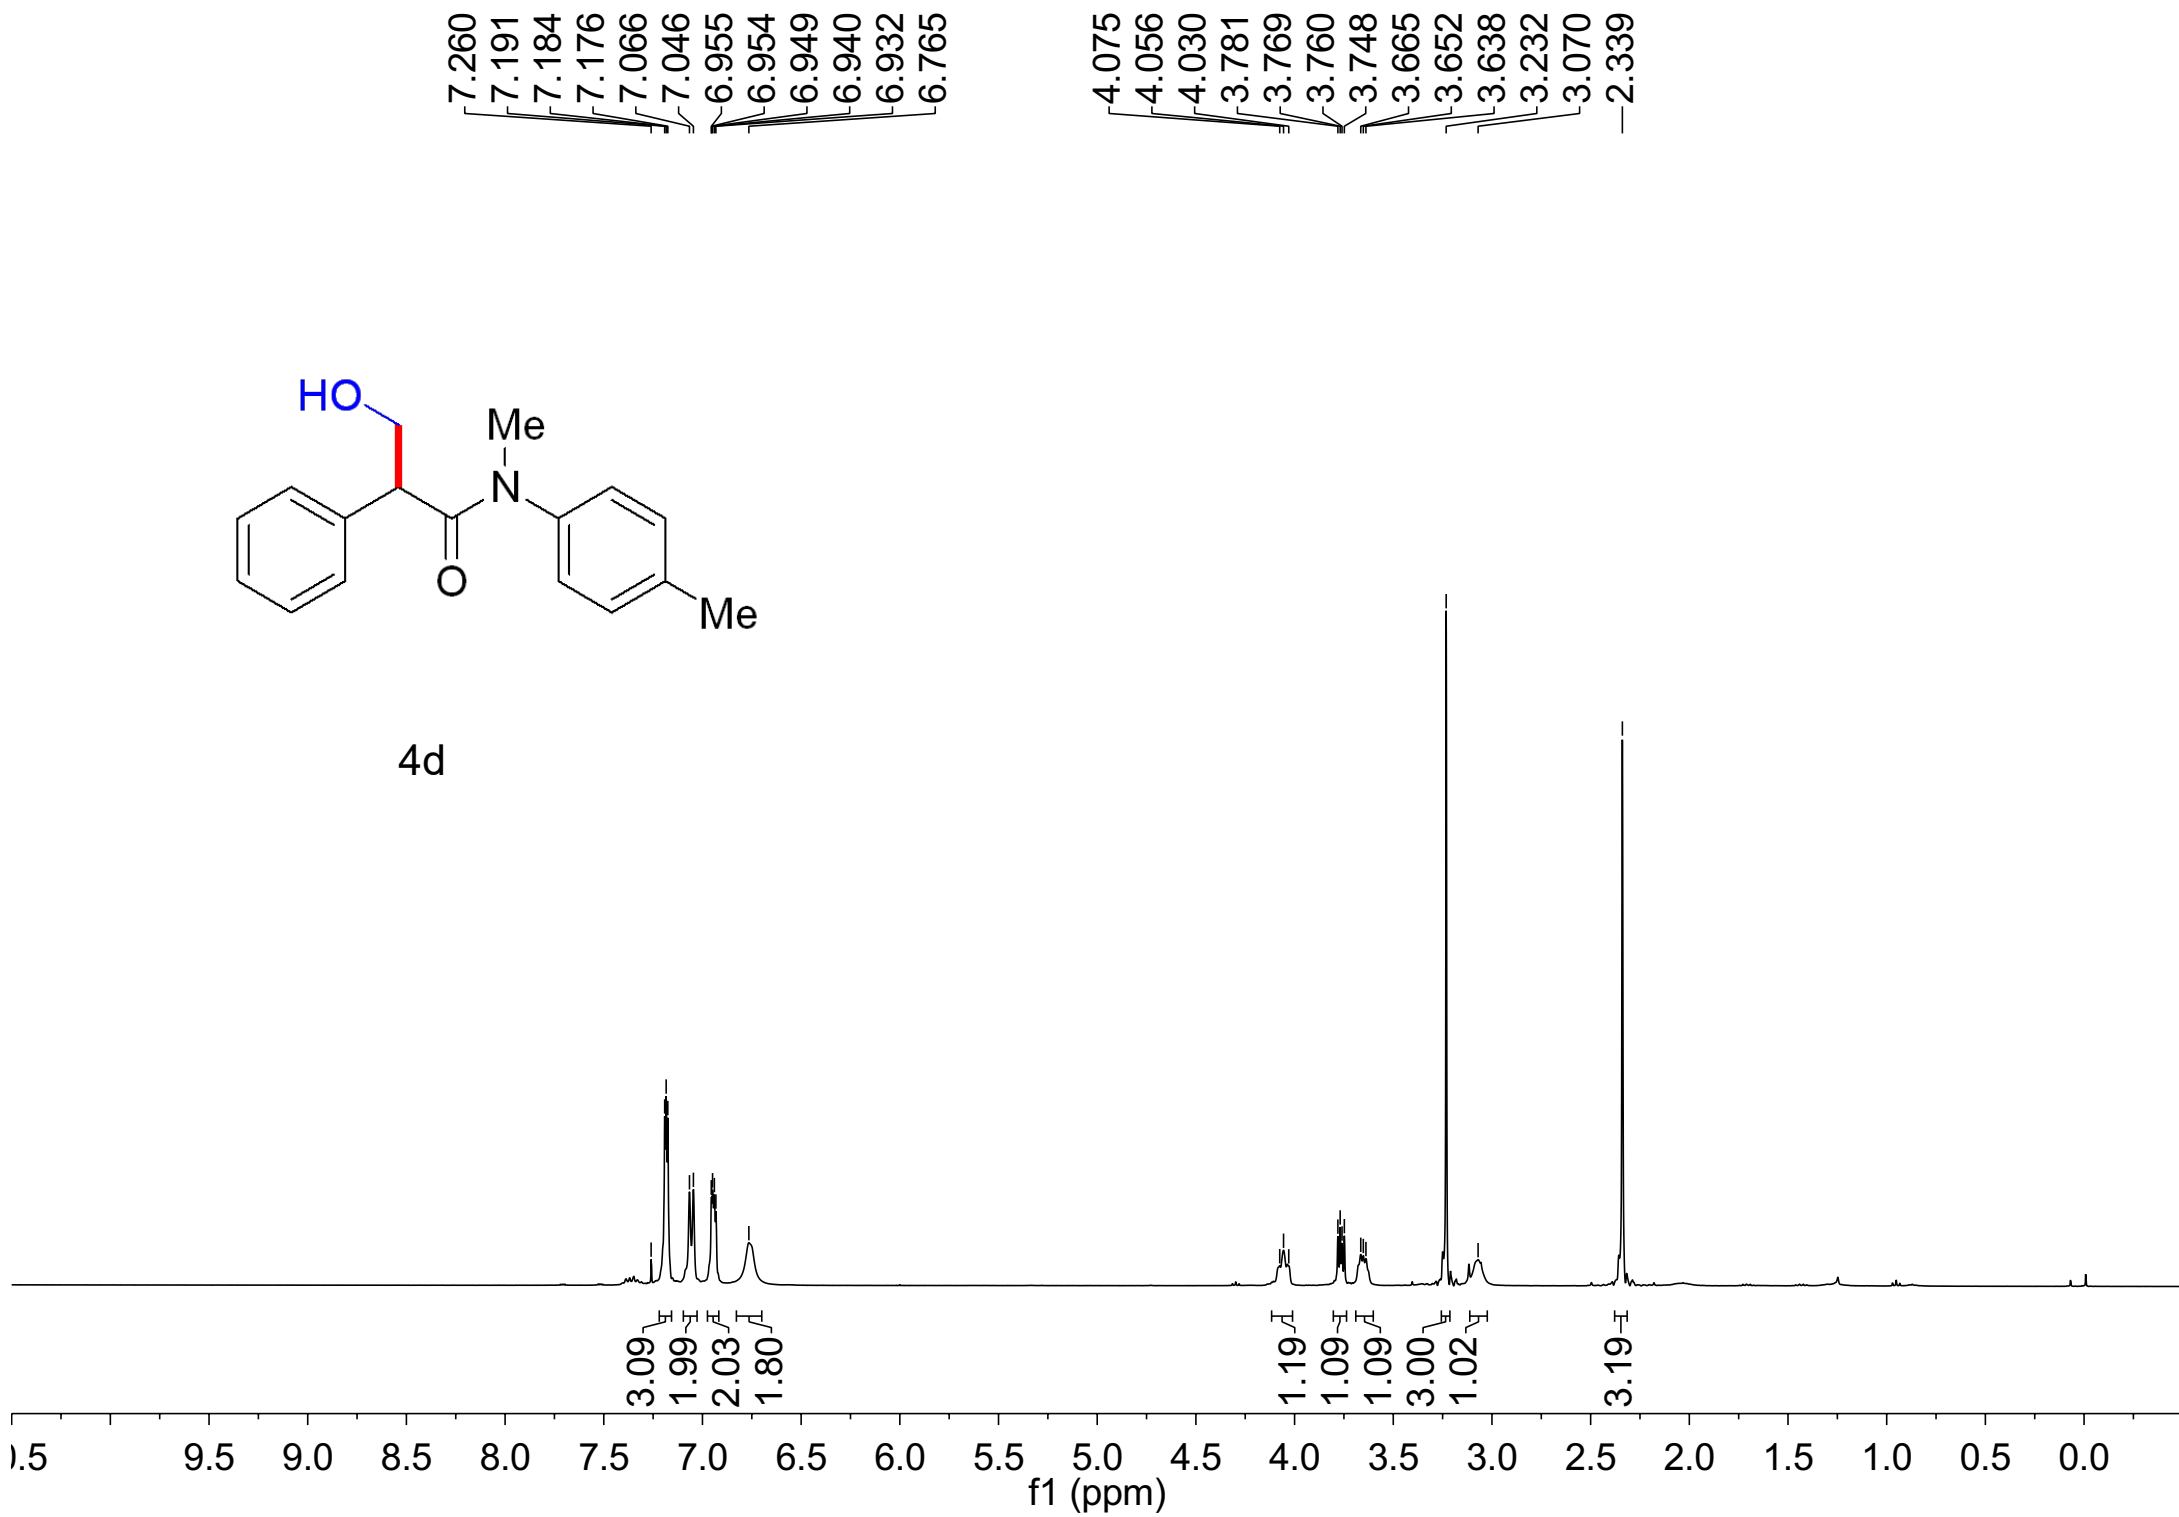

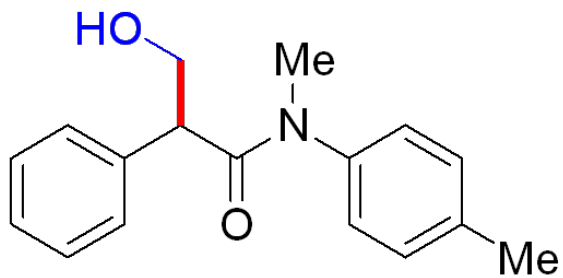

4d

172.72  
140.31  
137.74  
136.66  
129.90  
128.35  
128.13  
127.51  
127.03

77.21  
77.00  
76.79  
65.65  
51.73  
37.56  
21.00

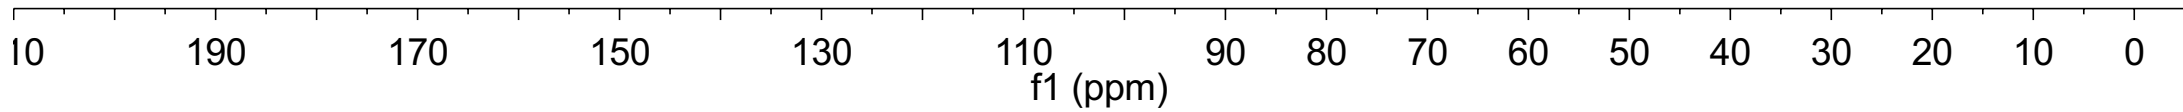

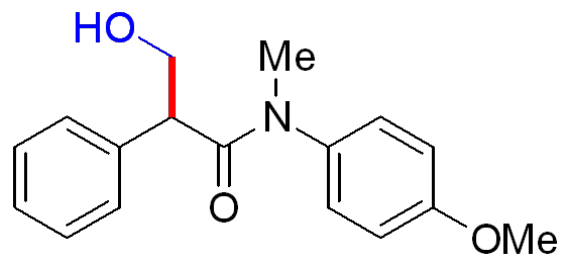

4e

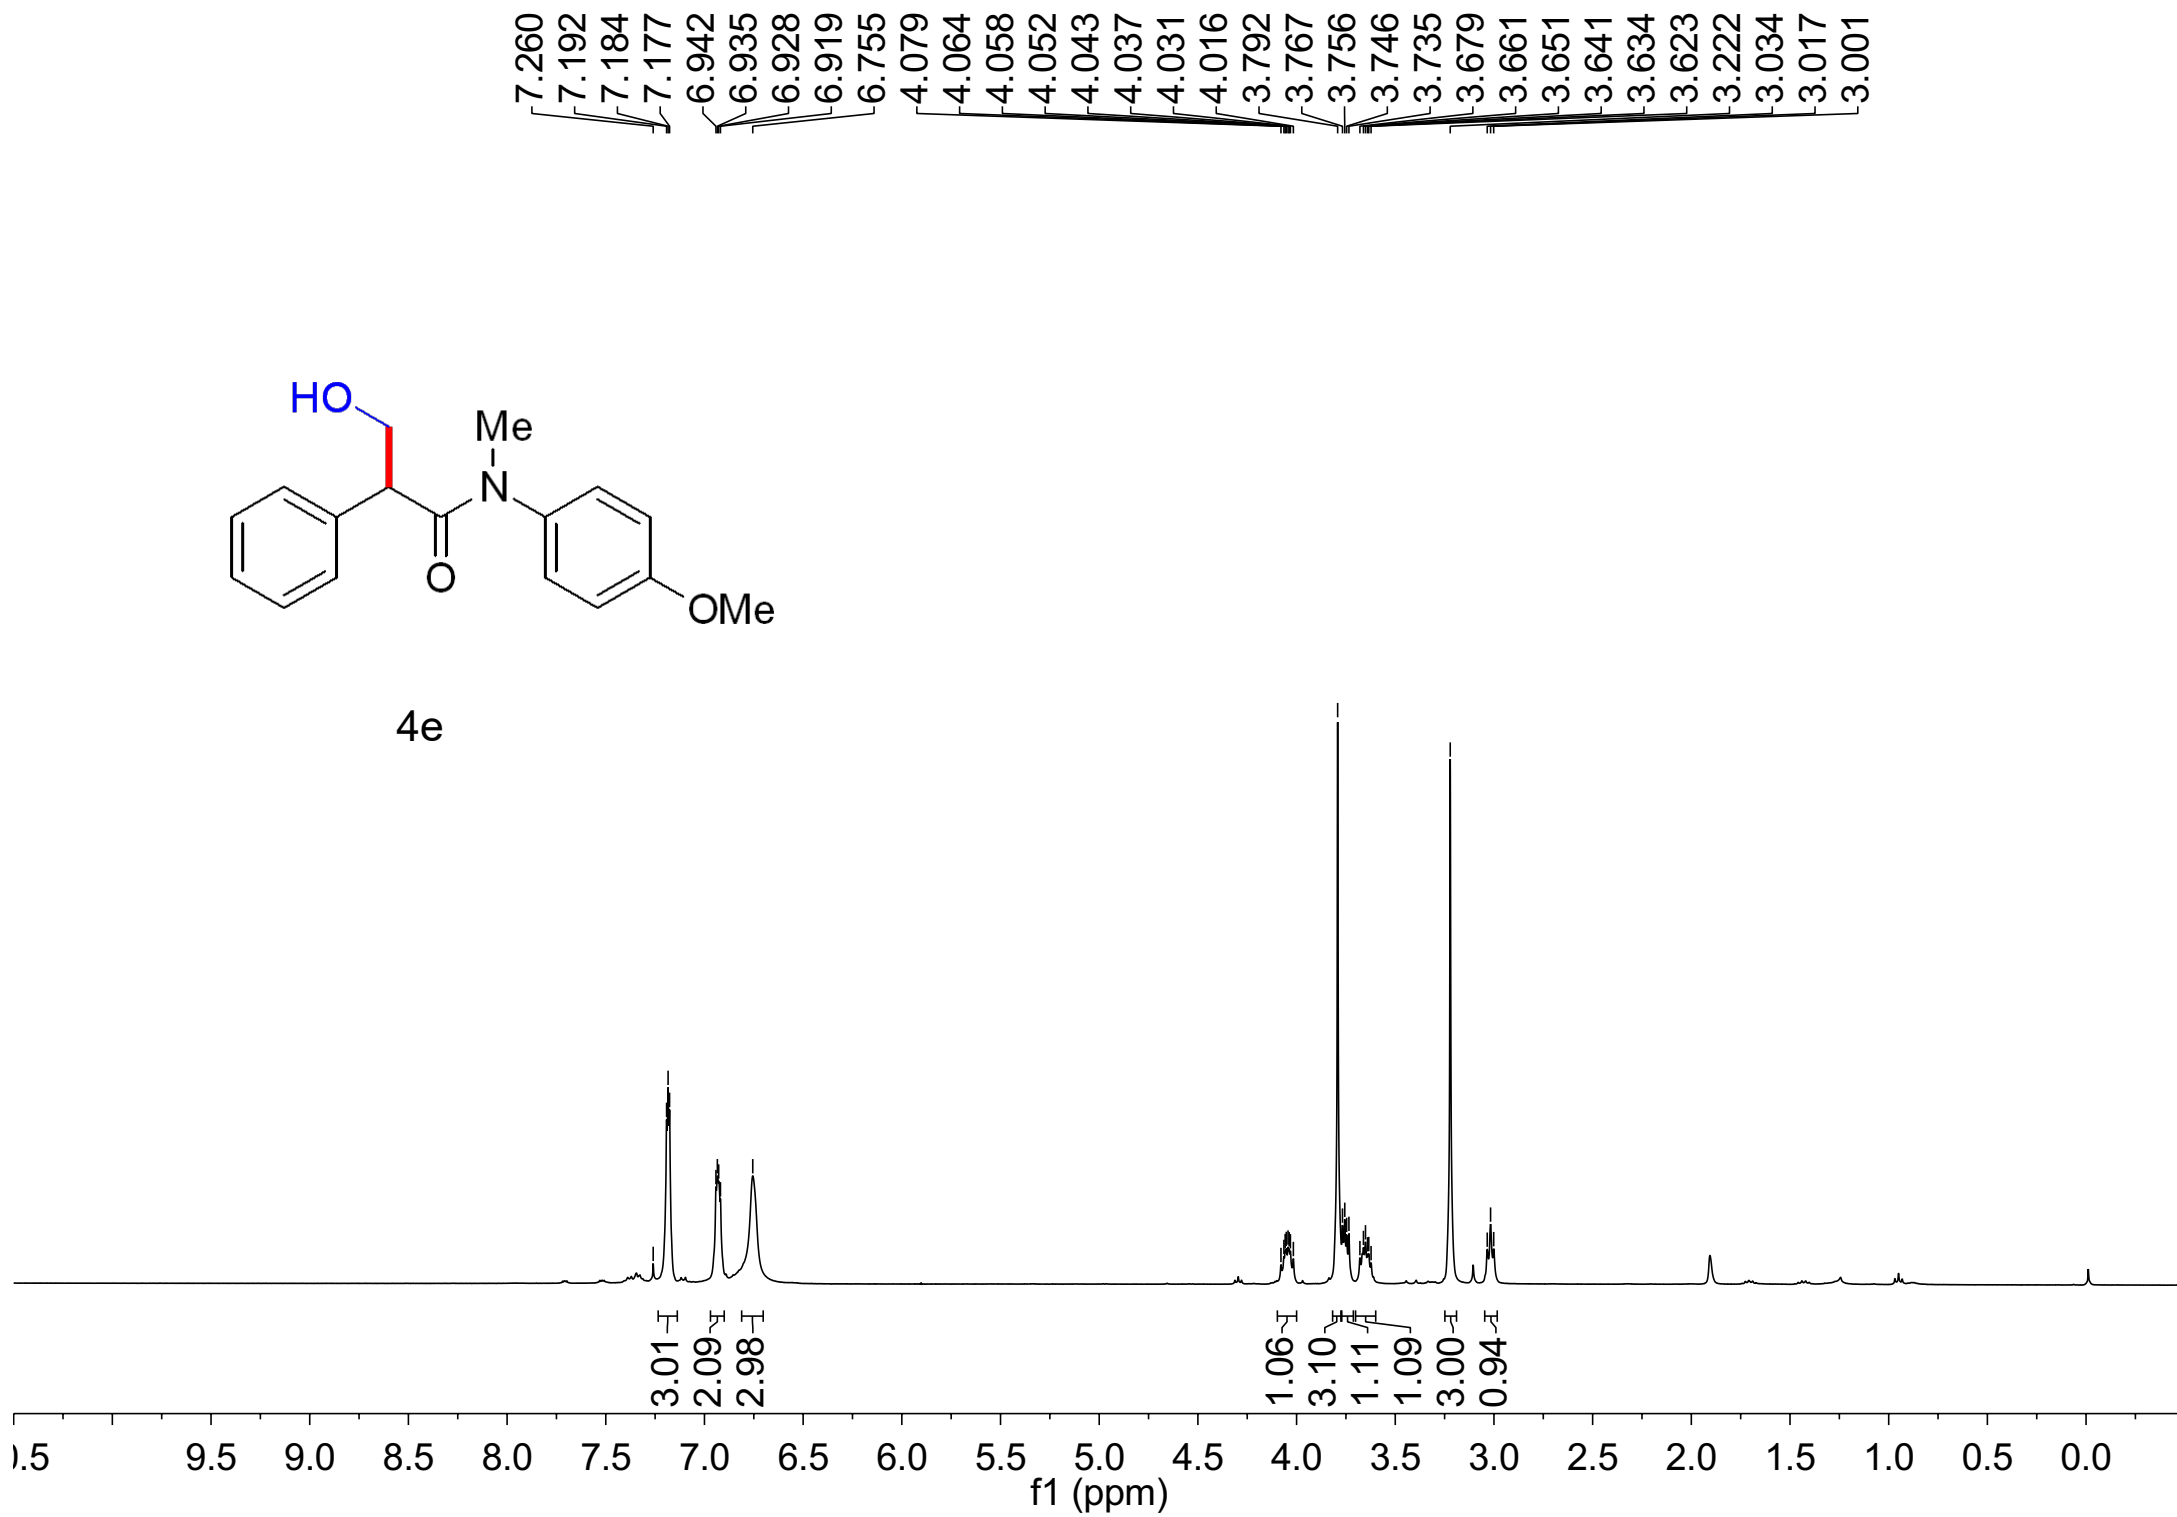

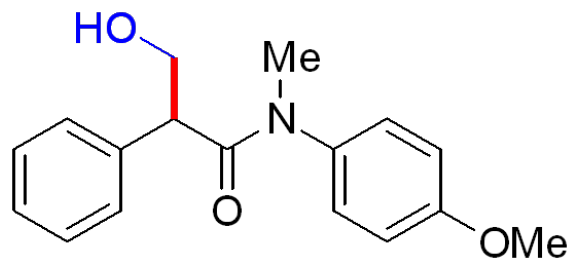

4e

—172.96

—158.88

136.64

135.65

128.89

128.38

128.13

127.06

—114.41

77.21

77.00

76.79

—65.65

—55.43

—51.83

—37.70



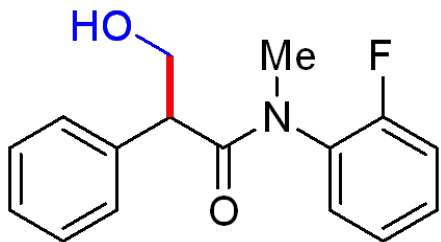

4f

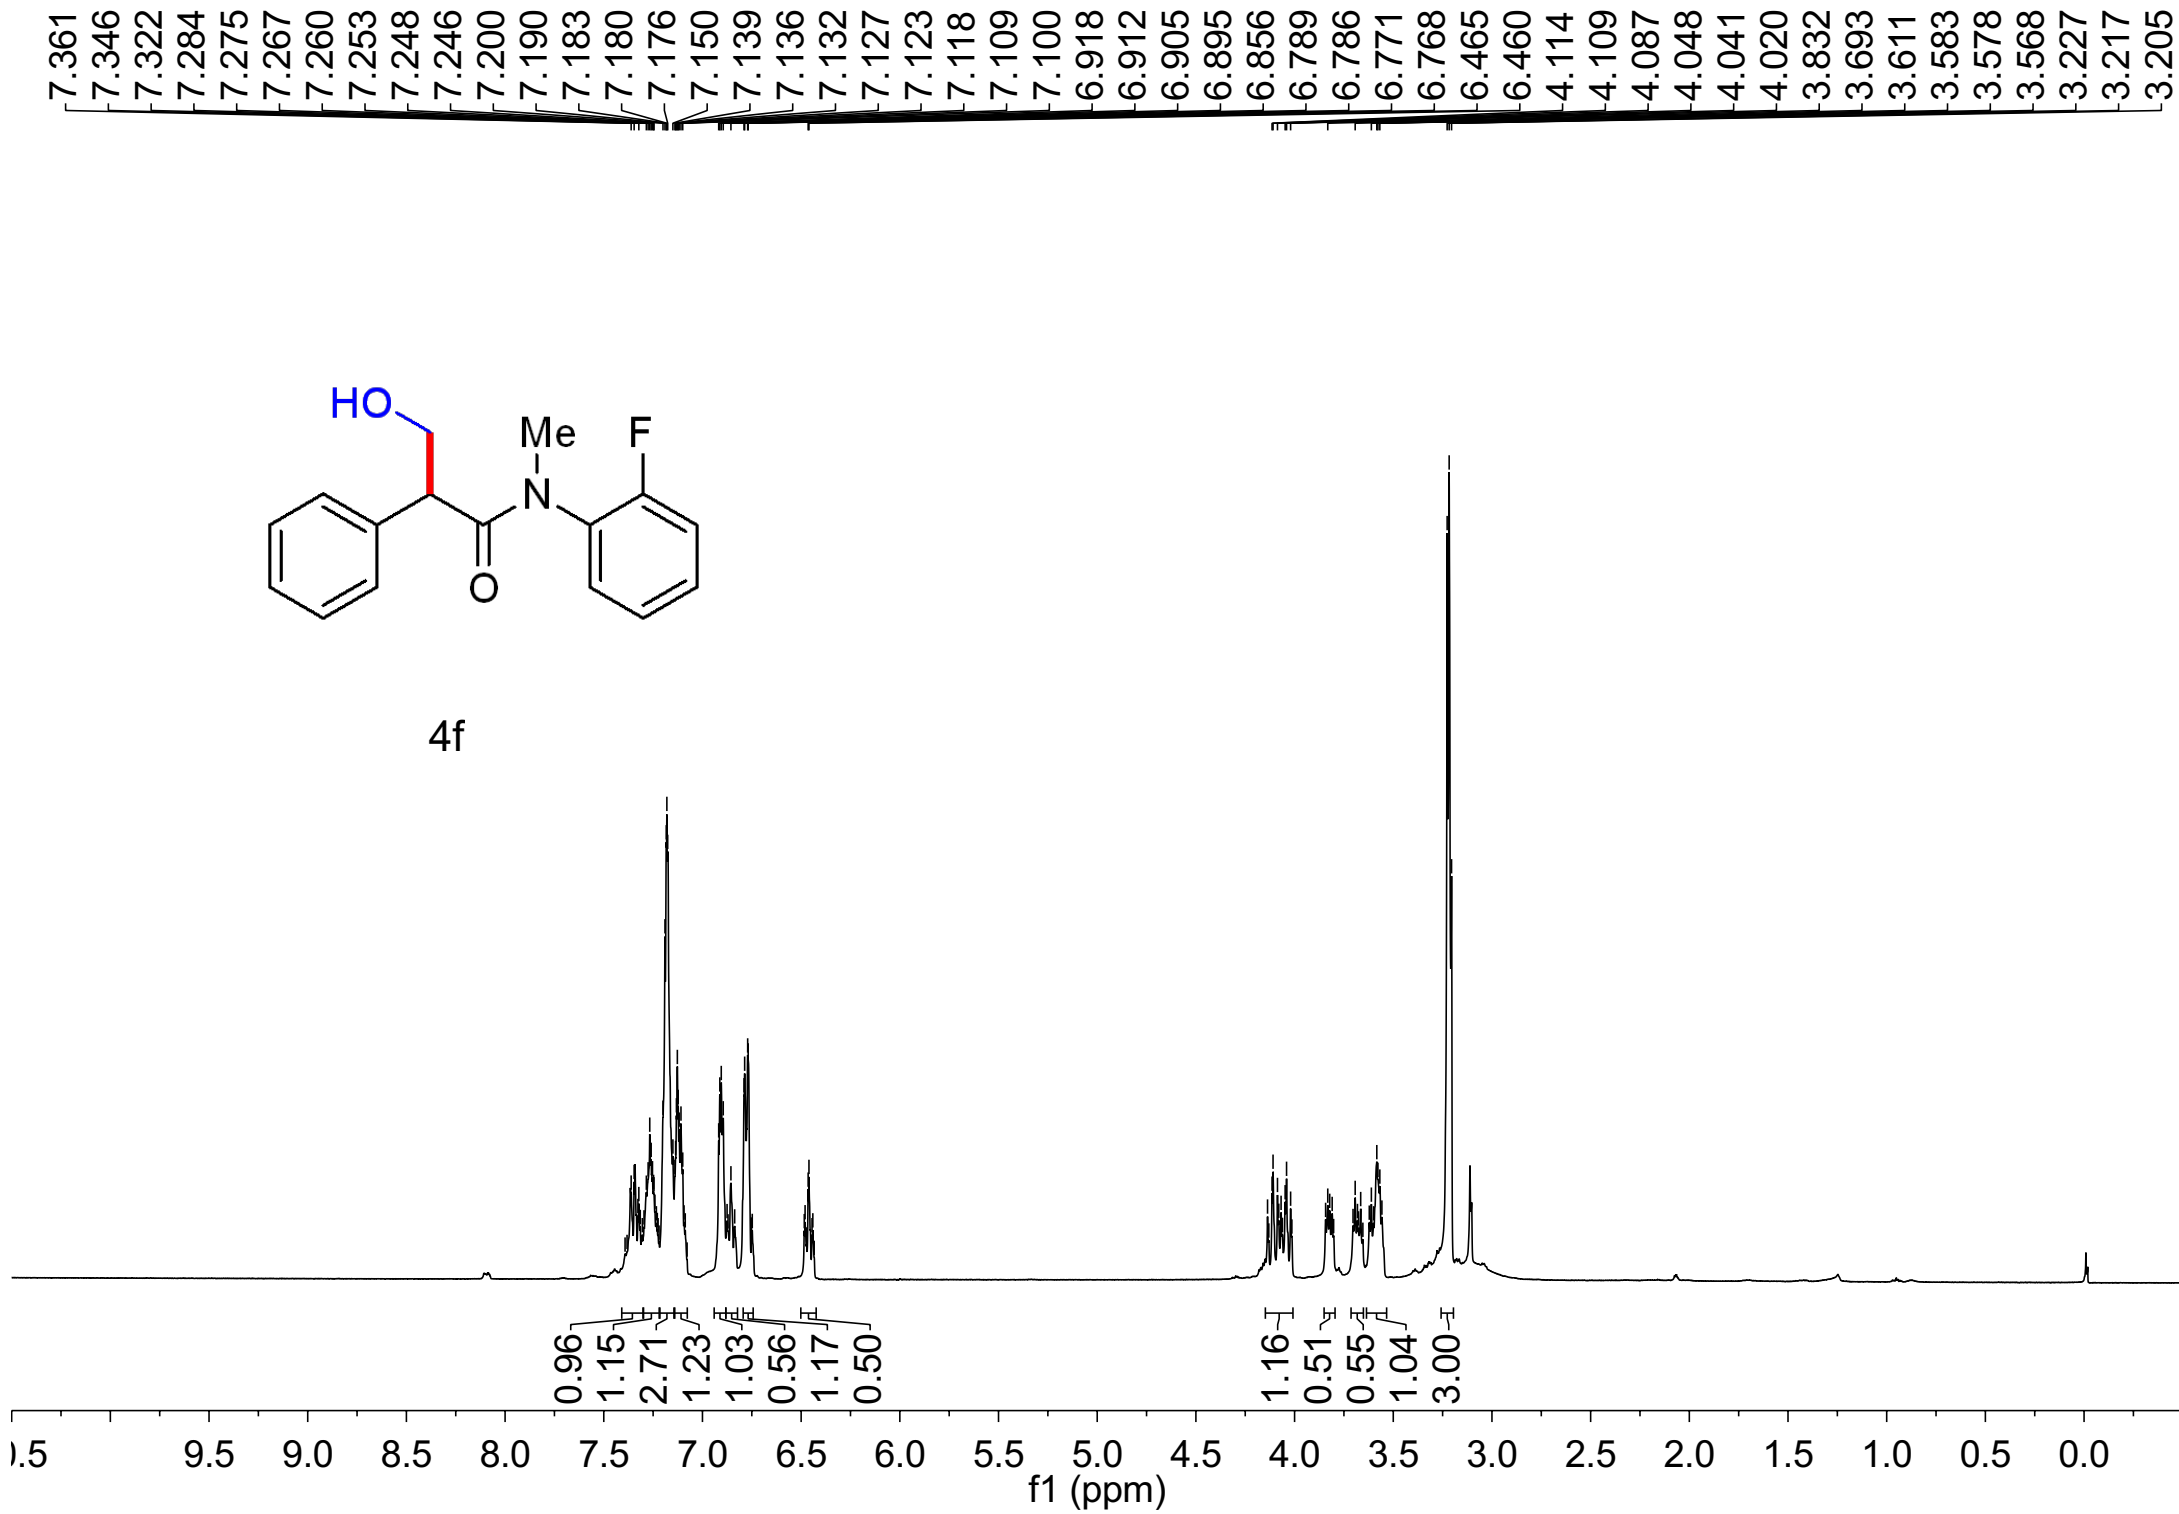

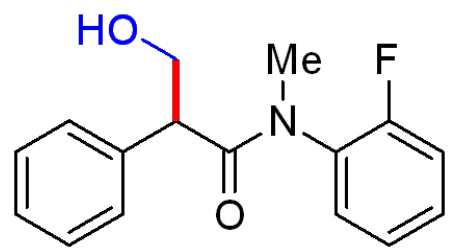

4f

- 172.953
- 172.821
- 159.190
- 158.536
- 157.518
- 156.879
- 130.347
- 130.015
- 129.961
- 128.456
- 128.260
- 127.950
- 127.824
- 127.173
- 127.077
- 124.497
- 124.470
- 116.669
- 116.649
- 116.537
- 116.517
- 77.212
- 77.000
- 76.788
- 65.533
- 65.424
- 52.363
- 52.265
- 36.707
- 36.381
- 36.370

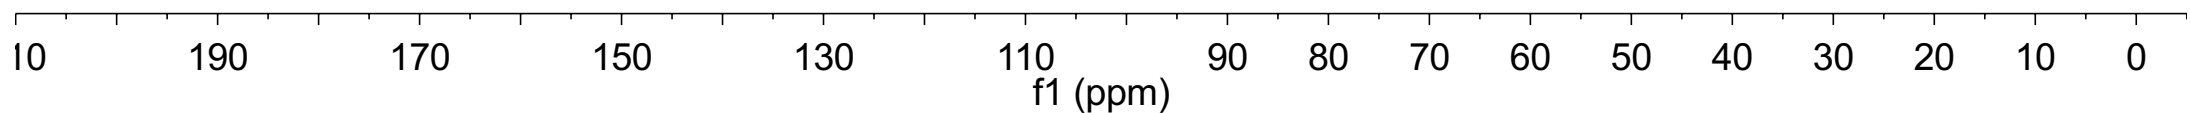

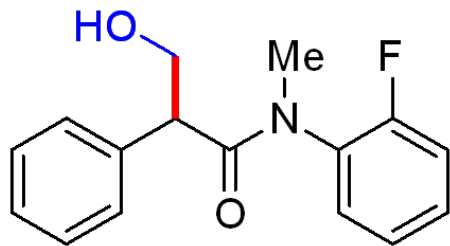

4f

--119.227  
--121.923

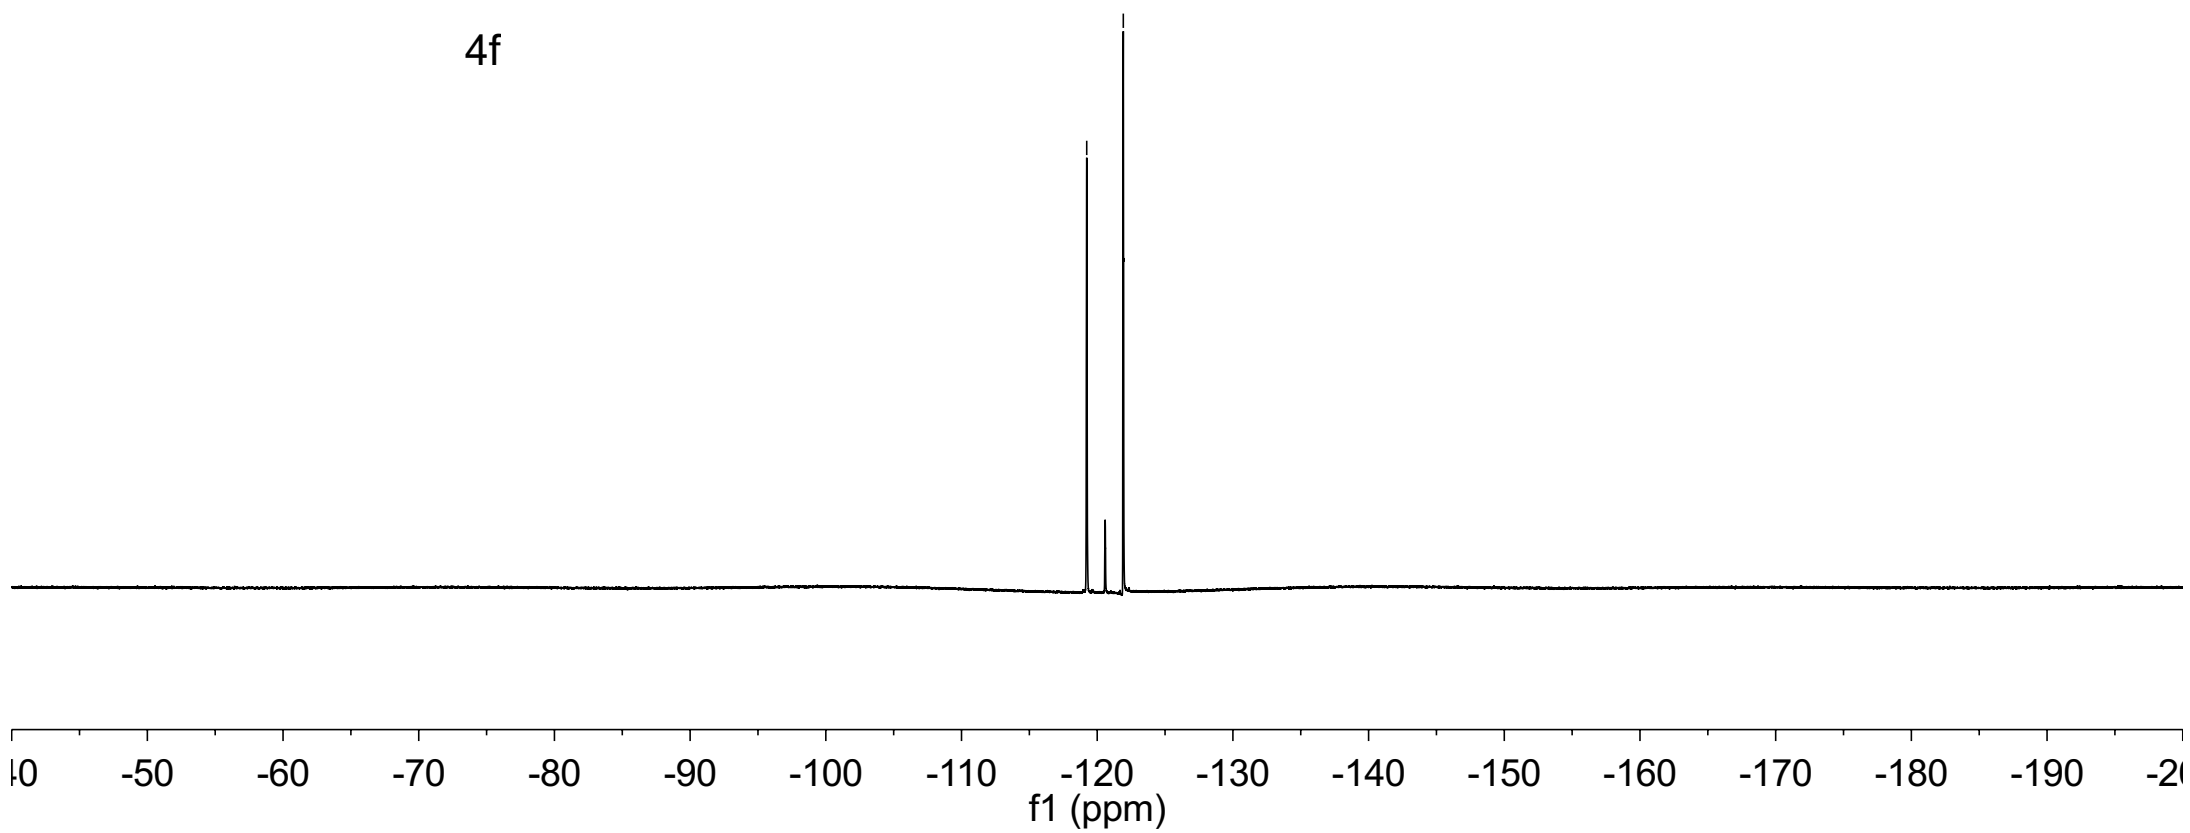

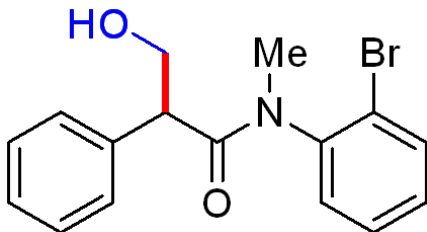

4g

7.426  
7.406  
7.260  
7.216  
7.209  
7.202  
7.156  
7.136  
7.116  
6.947  
6.902  
6.895  
6.841

4.105  
4.093  
4.080  
4.073  
4.060  
4.046  
3.721  
3.710  
3.700  
3.689  
3.667  
3.650  
3.640  
3.629  
3.234  
2.937

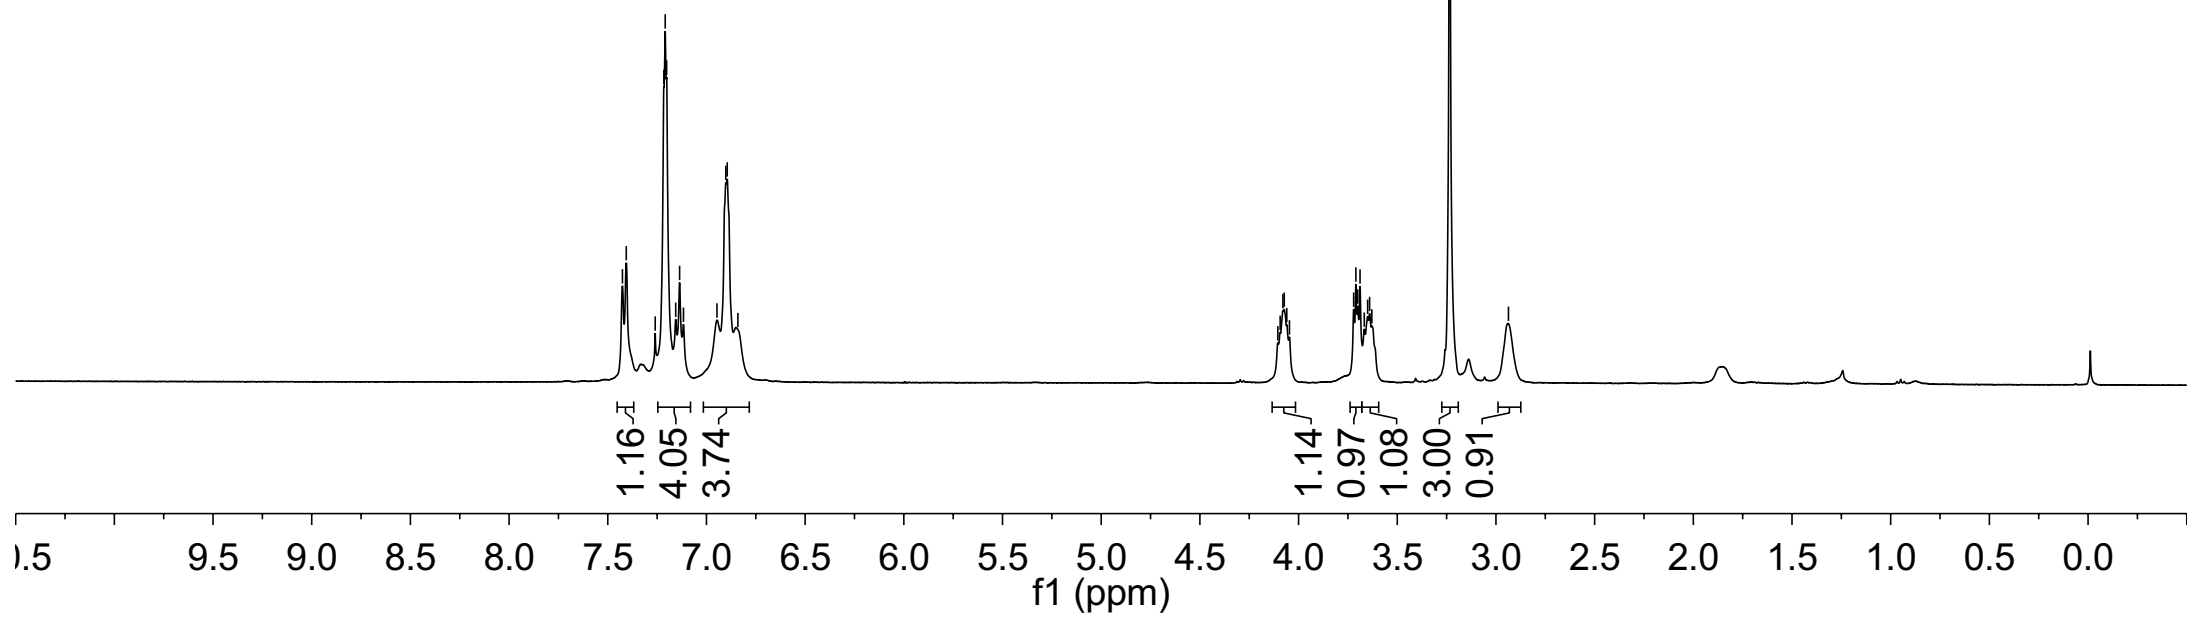



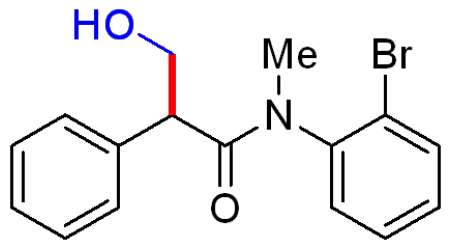

4g

172.36  
144.01  
136.16  
131.34  
131.08  
130.52  
128.59  
128.01  
127.32  
126.60  
122.47

77.21  
77.00  
76.79  
65.54  
52.36  
37.51

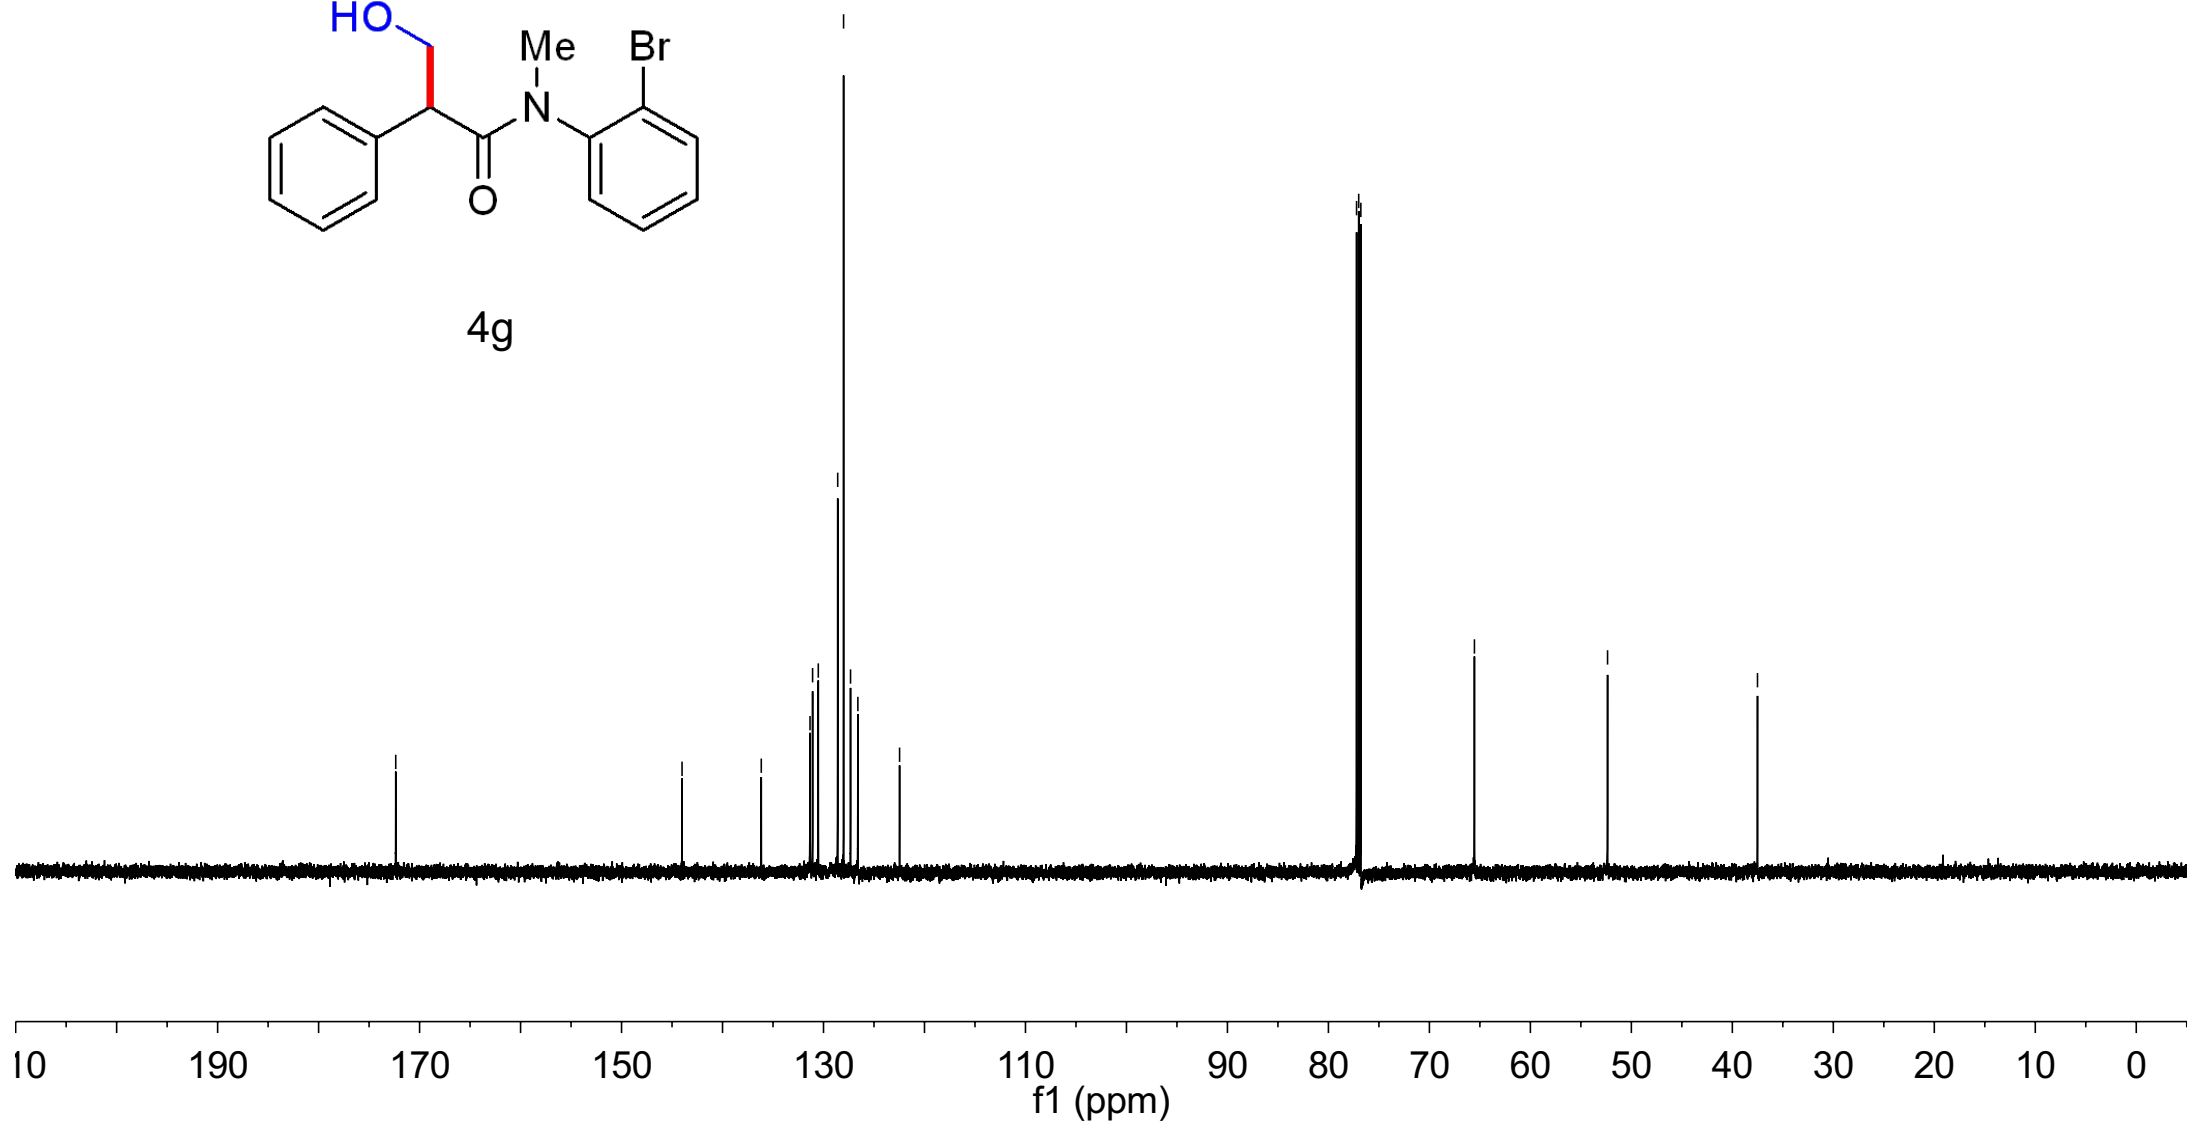

7.485  
7.464  
7.453  
7.313  
7.290  
7.278  
7.260  
7.243  
7.223  
7.199  
7.187  
7.174  
7.152  
7.133  
7.116  
7.030  
7.012  
6.941  
6.912  
6.901  
6.807  
6.788  
6.368  
6.349

4.106  
4.083  
3.796  
3.653  
3.640  
3.623  
3.612  
3.417  
3.406  
3.396  
3.186  
3.163  
3.150

1.362

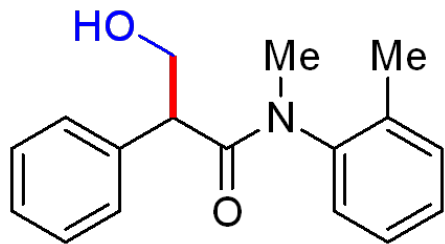

4h

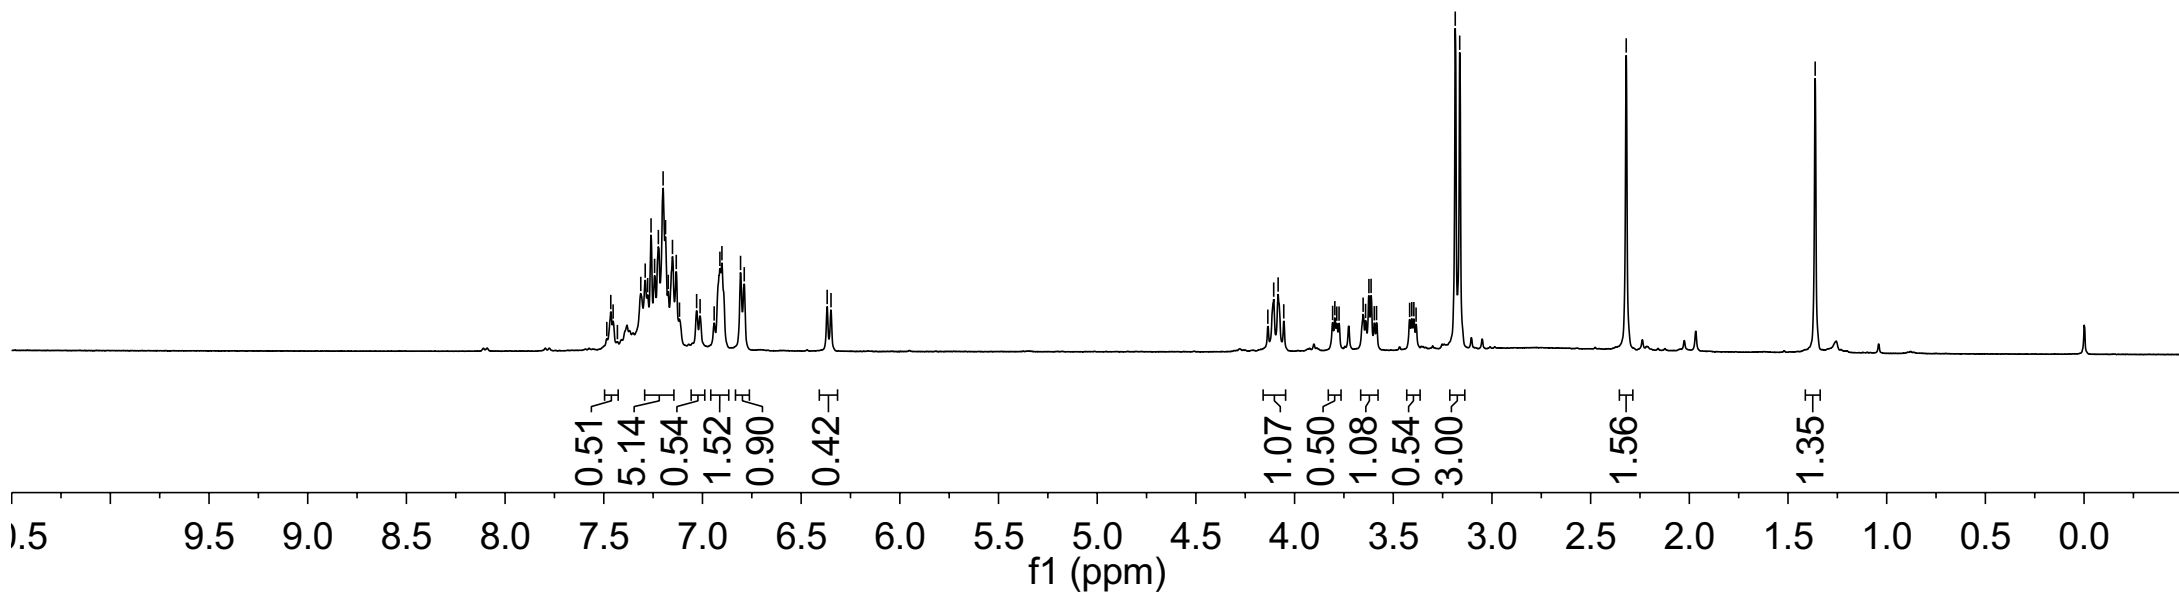

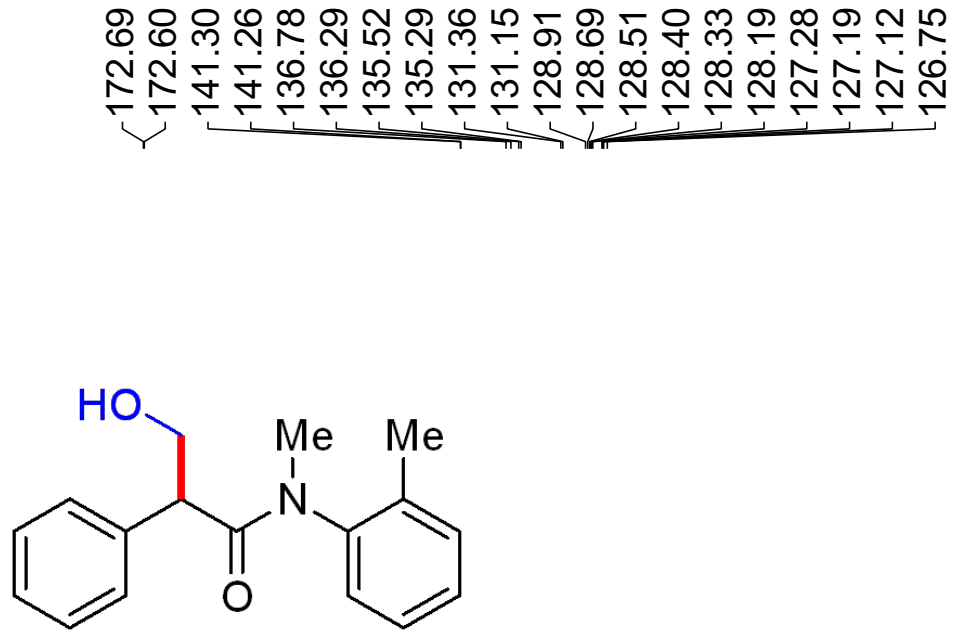

4h

172.69  
172.60  
141.30  
141.26  
136.78  
136.29  
135.52  
135.29  
131.36  
131.15  
128.91  
128.69  
128.51  
128.40  
128.33  
128.19  
127.28  
127.19  
127.12  
126.75

77.21  
77.00  
76.79

65.62  
65.48

52.48  
51.90

36.20  
36.06

17.51  
16.35

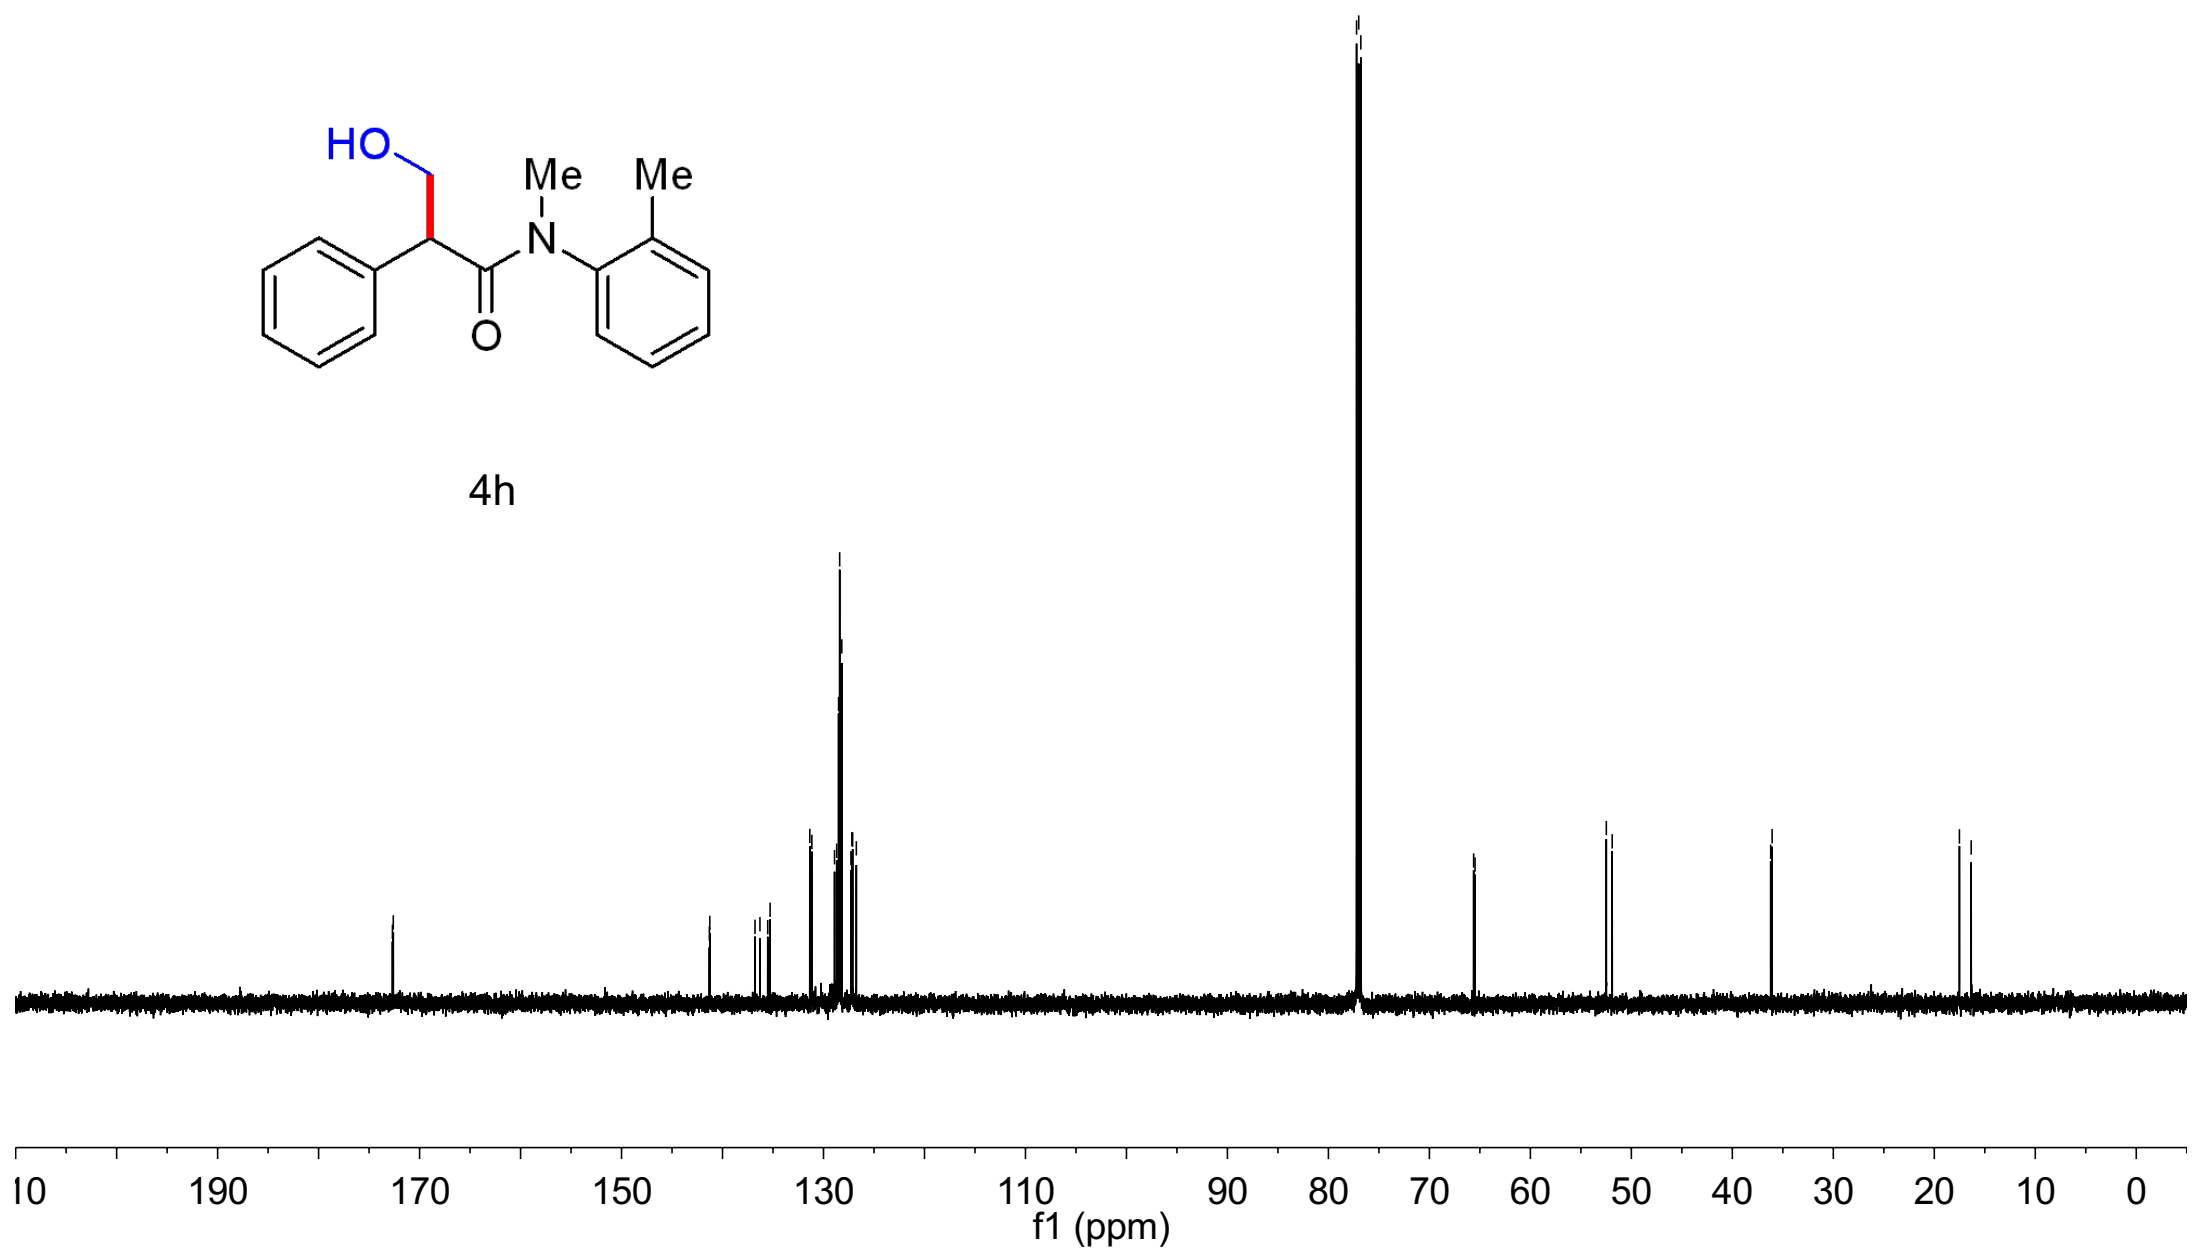

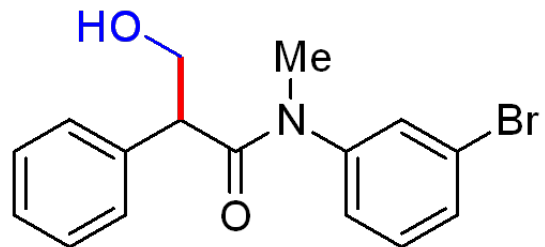

4i

7.328  
7.324  
7.321  
7.307  
7.260  
7.252  
7.245  
7.230  
6.977  
6.970  
6.962  
6.954  
6.874

4.169  
4.147  
4.142  
4.120  
3.789  
3.778  
3.768  
3.756  
3.702  
3.691  
3.675  
3.663  
3.285  
3.200

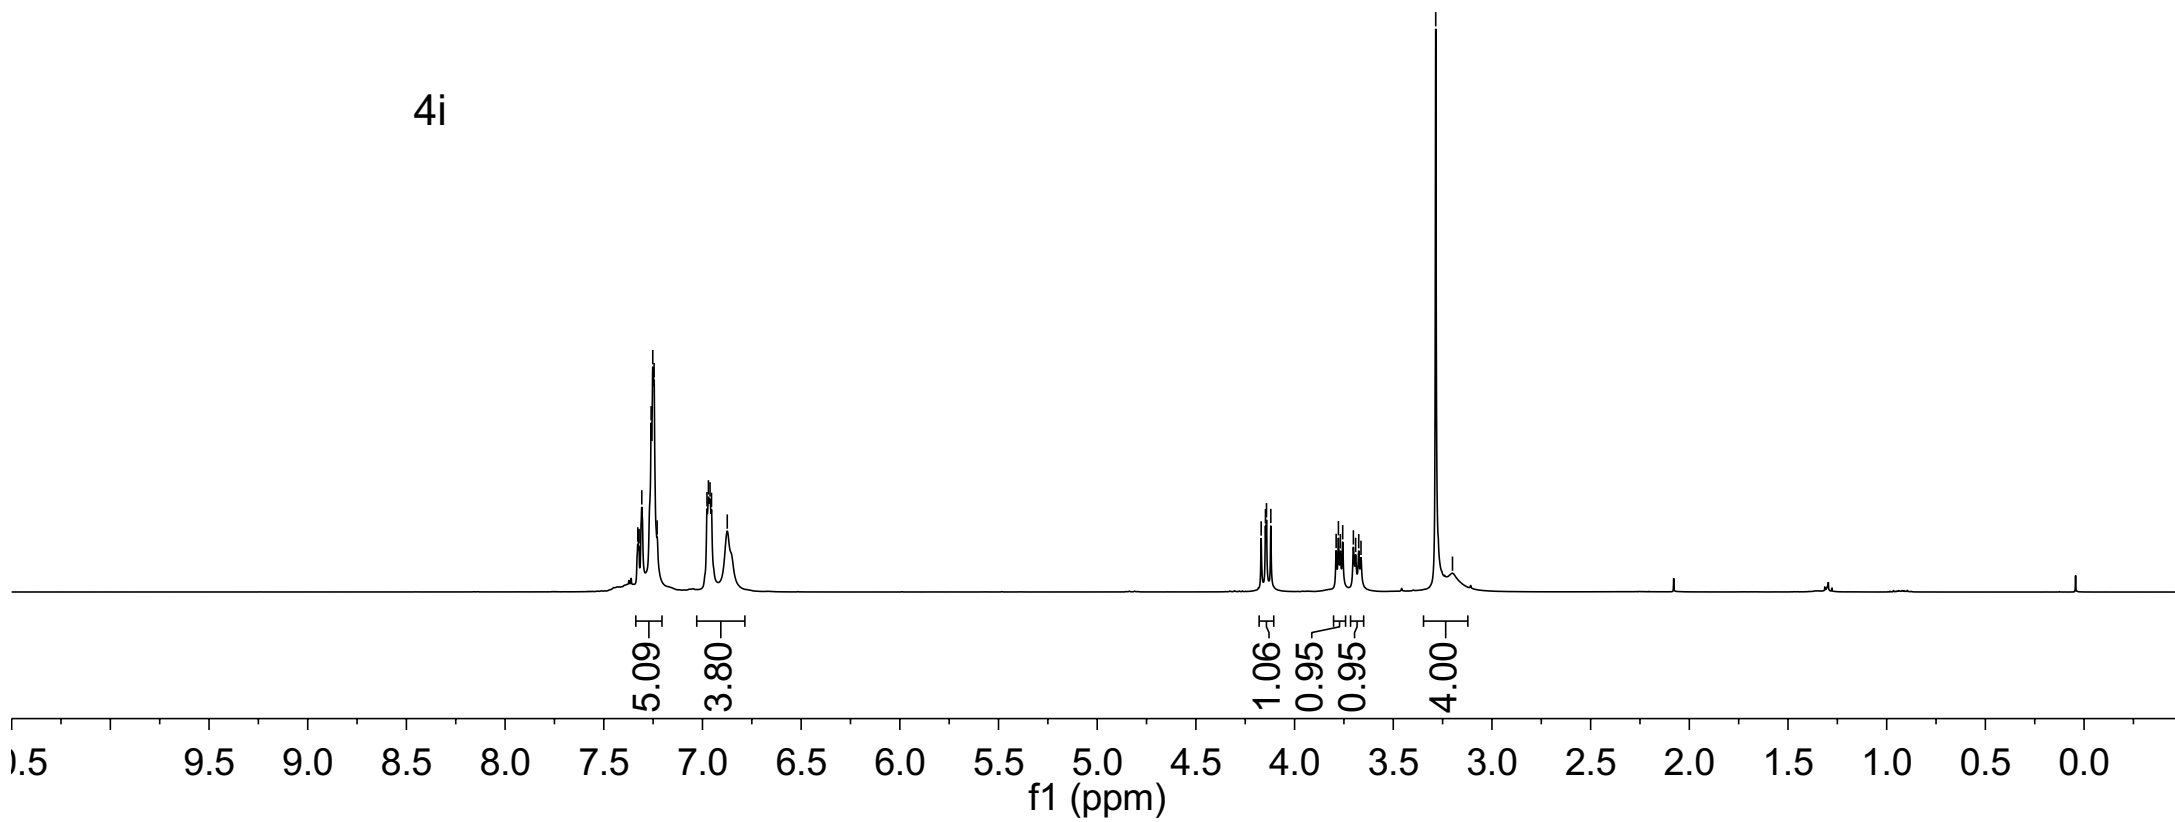

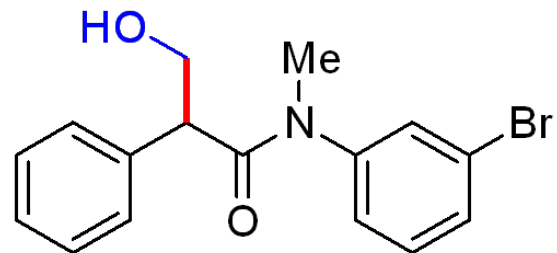

4i

172.31  
143.87  
136.15  
134.62  
130.23  
128.51  
128.39  
128.11  
127.96  
127.25  
126.11

77.32  
77.00  
76.68  
65.45  
52.25  
37.43

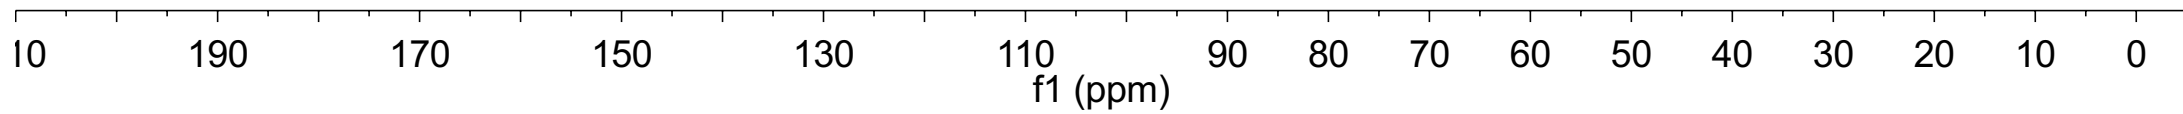

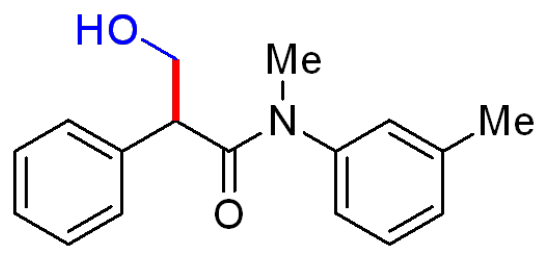

4j

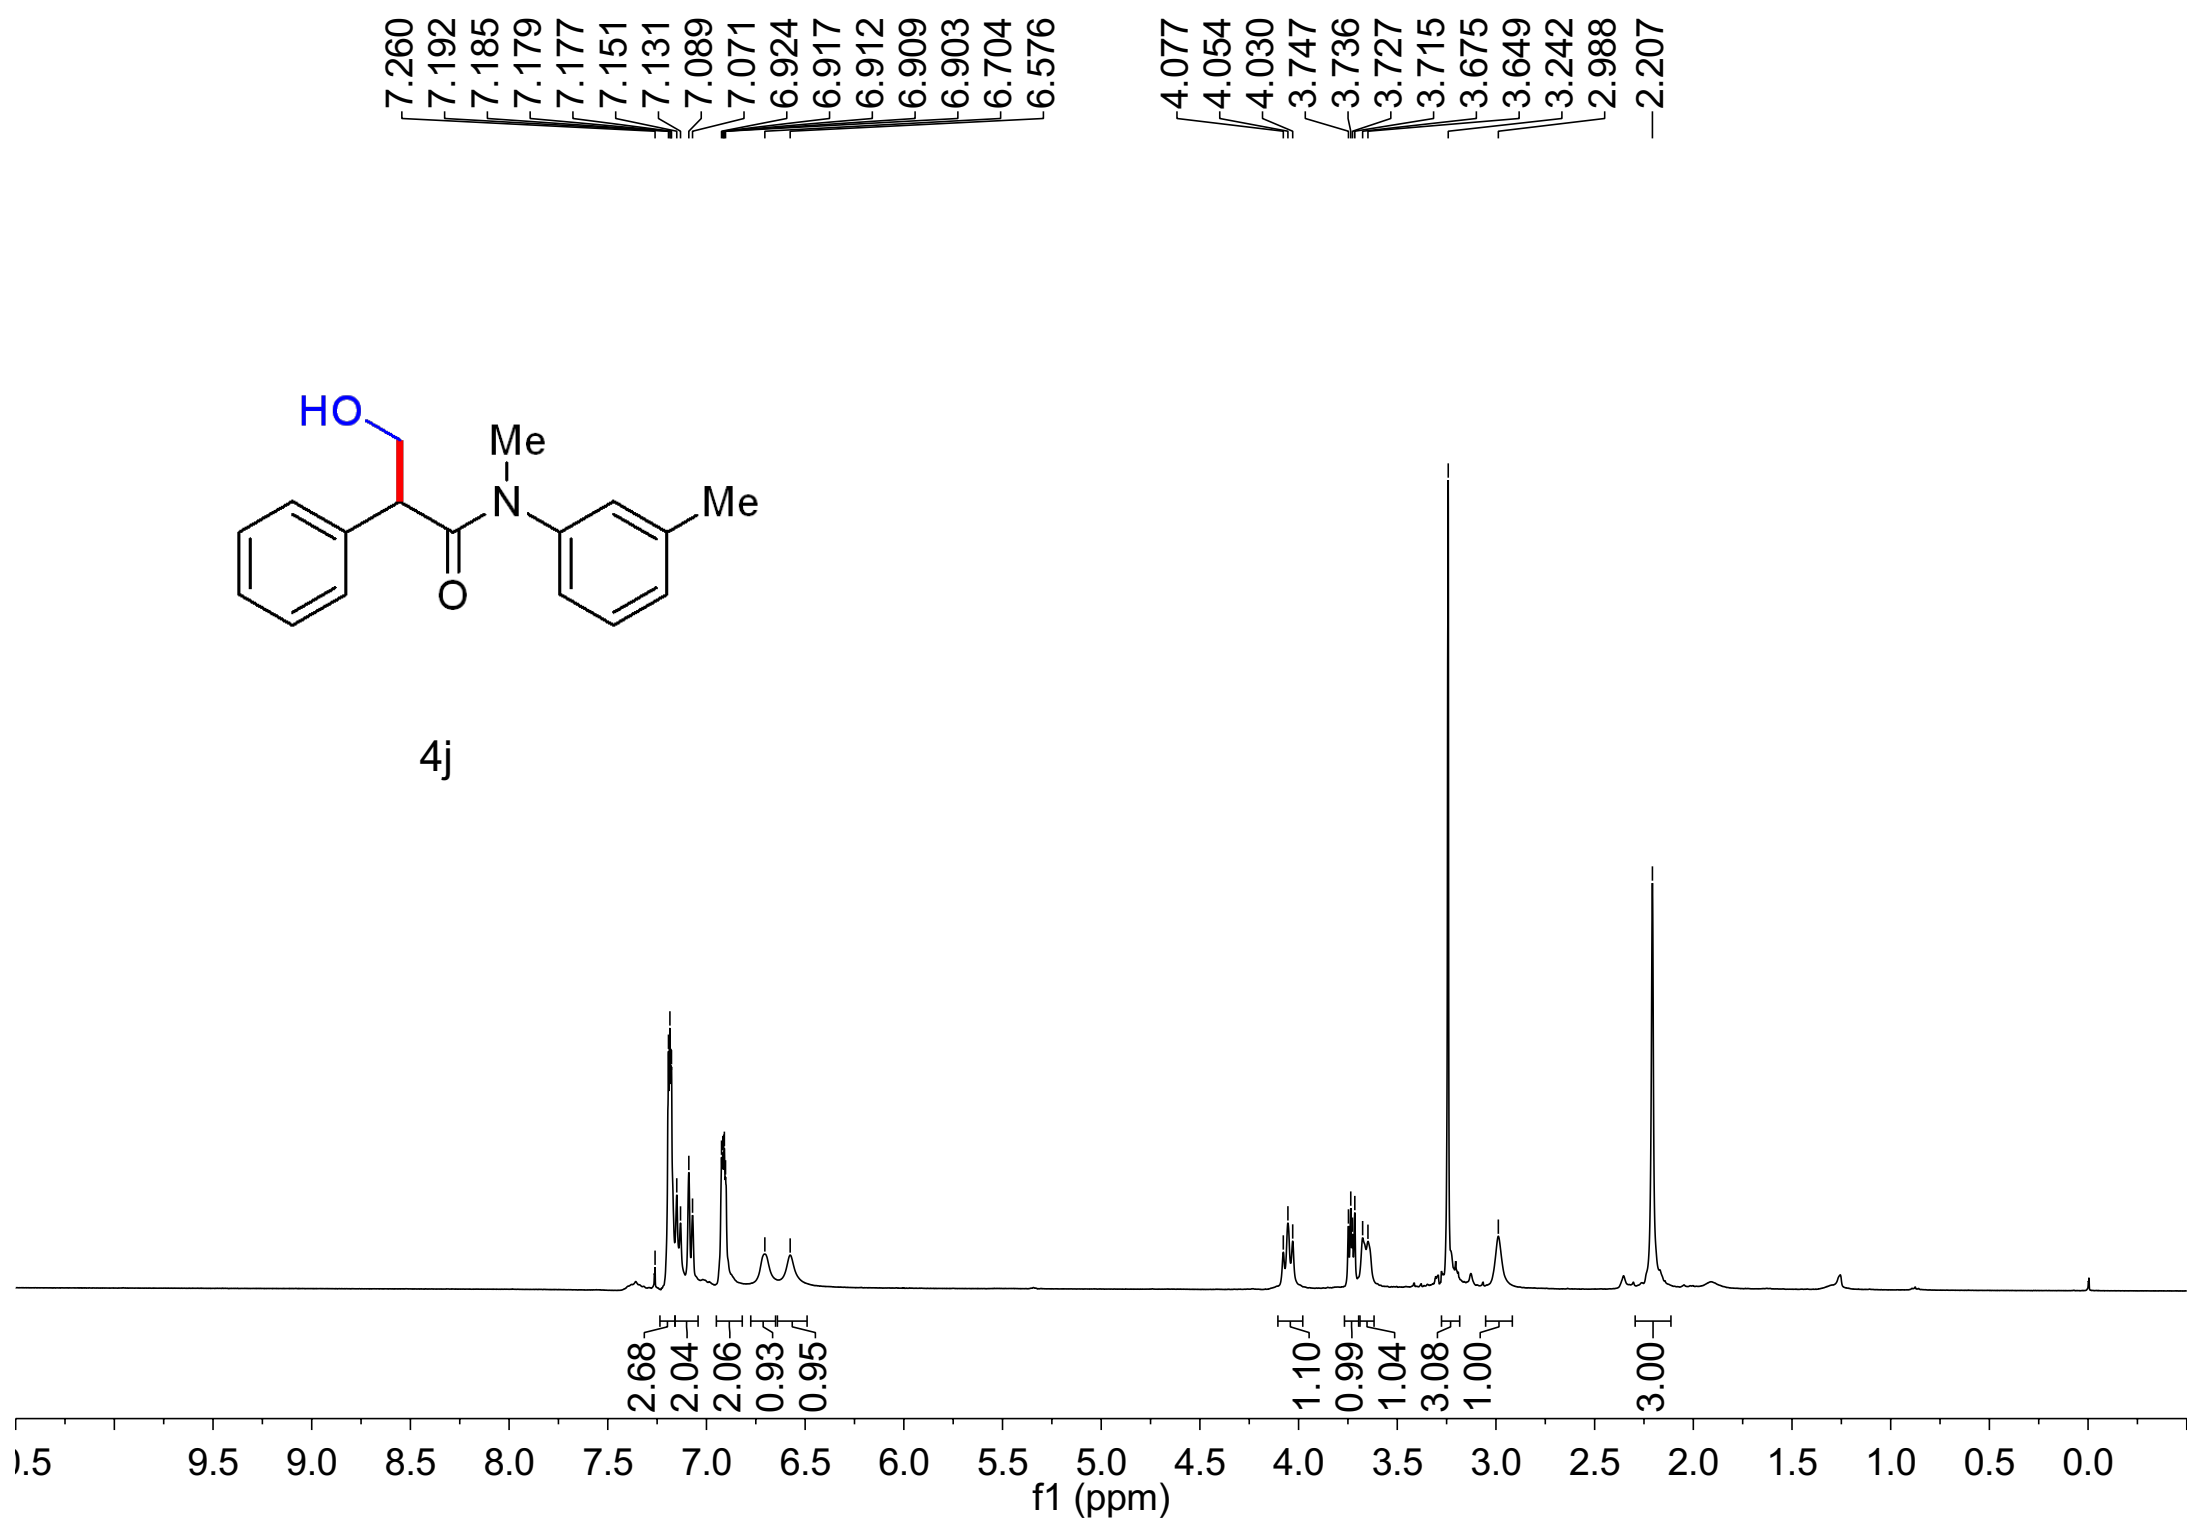

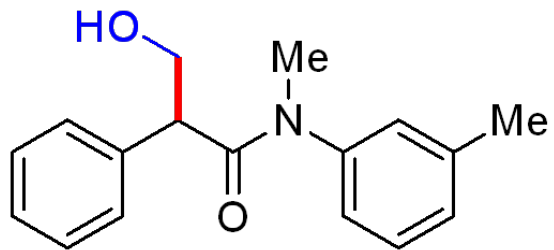

4j

172.57  
142.65  
139.34  
136.76  
129.08  
128.62  
128.56  
128.33  
128.13  
127.02  
124.64

77.21  
77.00  
76.79  
65.64  
52.02  
37.45  
21.03

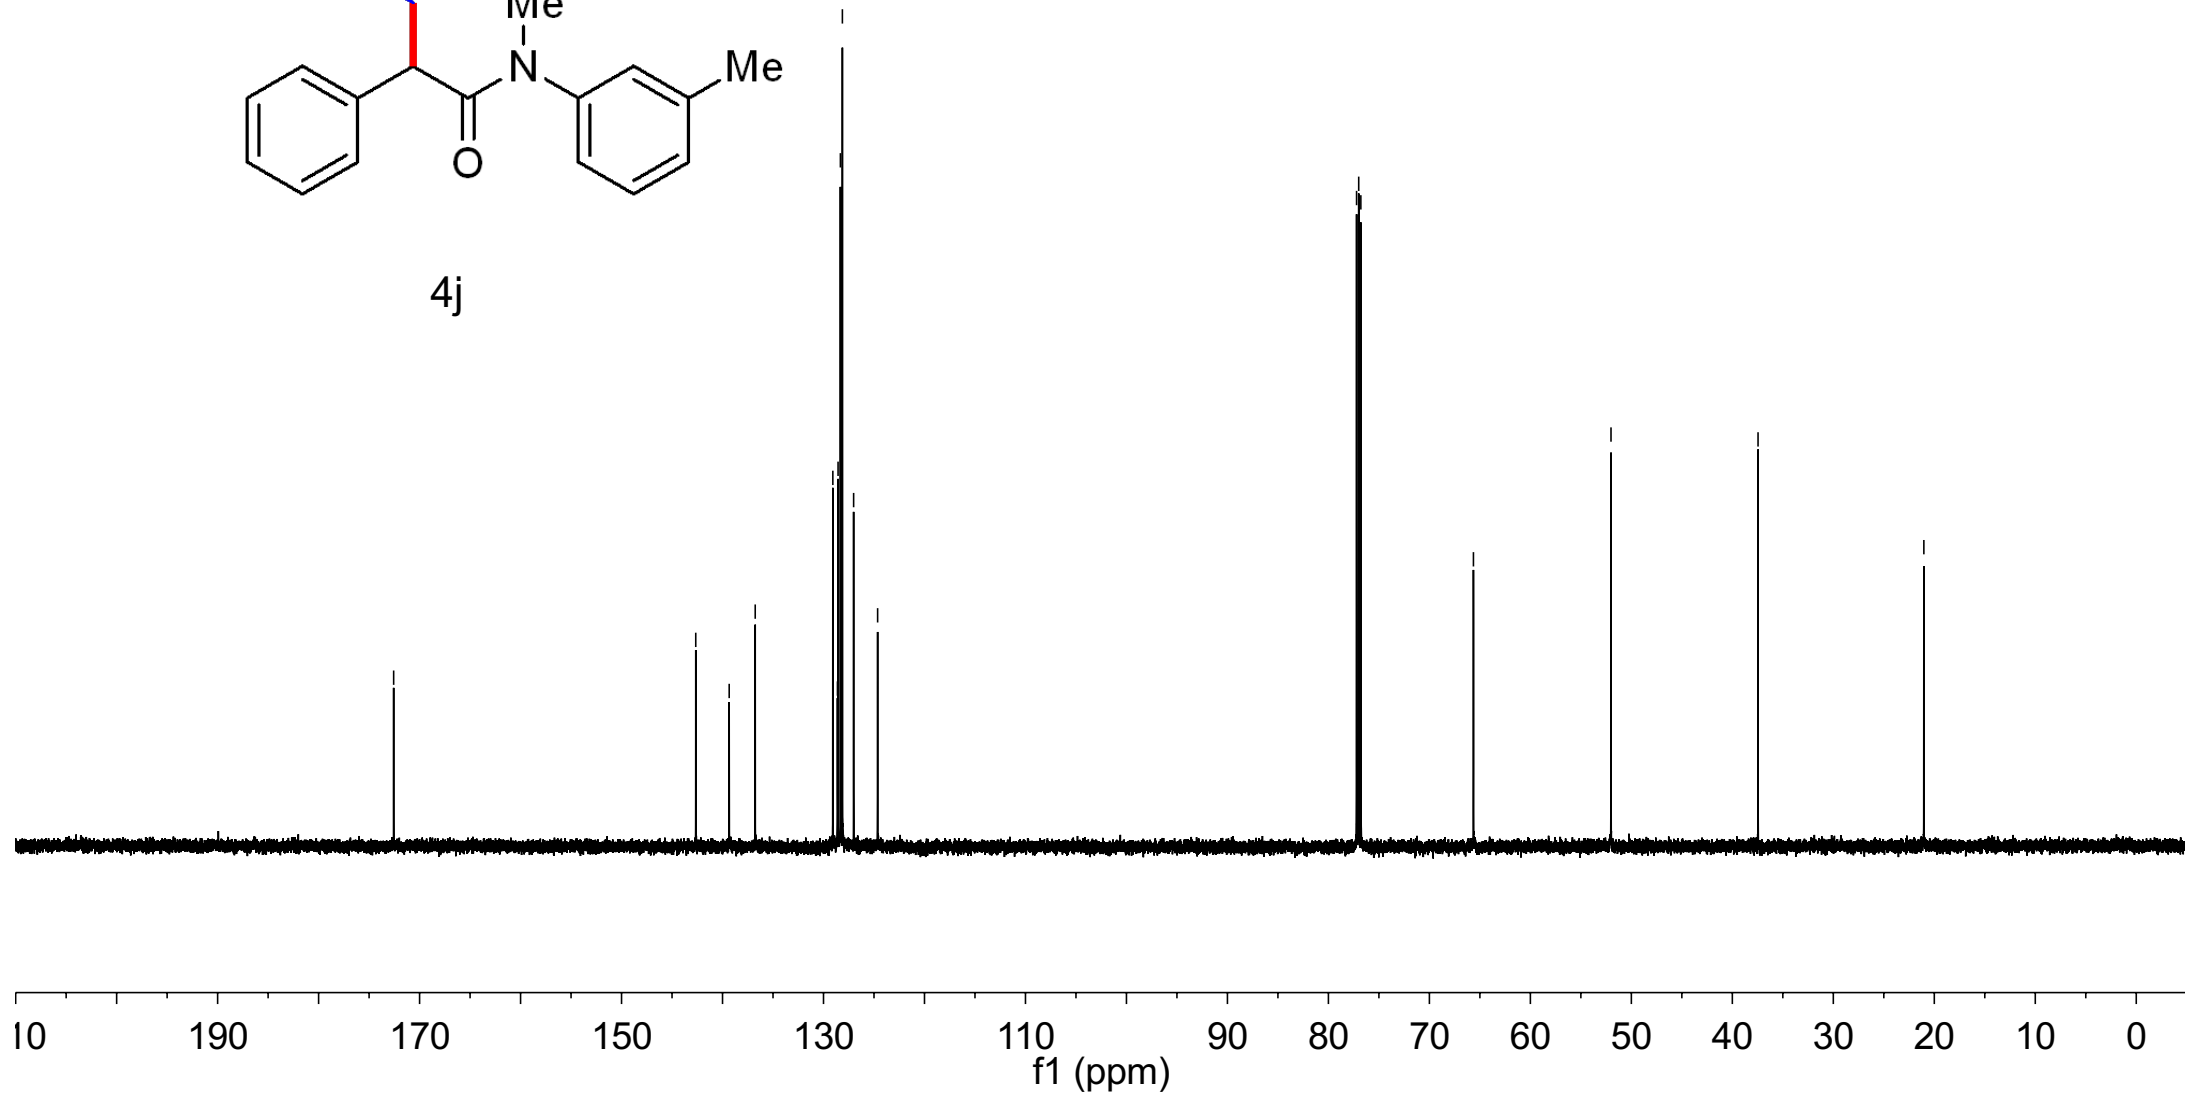

7.327  
7.308  
7.260  
7.252  
7.249  
7.239  
7.232  
7.223  
7.216  
7.192  
7.004  
6.998  
6.993  
6.989  
6.986  
6.983  
6.980

4.155  
4.136  
4.127  
4.021  
4.009  
3.999  
3.988  
3.733  
3.720  
3.708  
3.695  
3.687

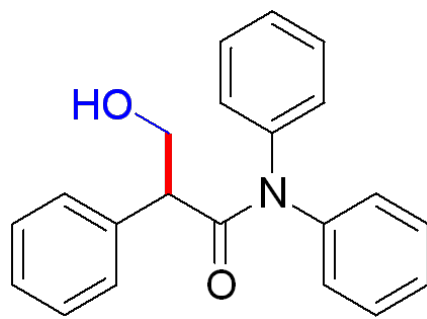

4k

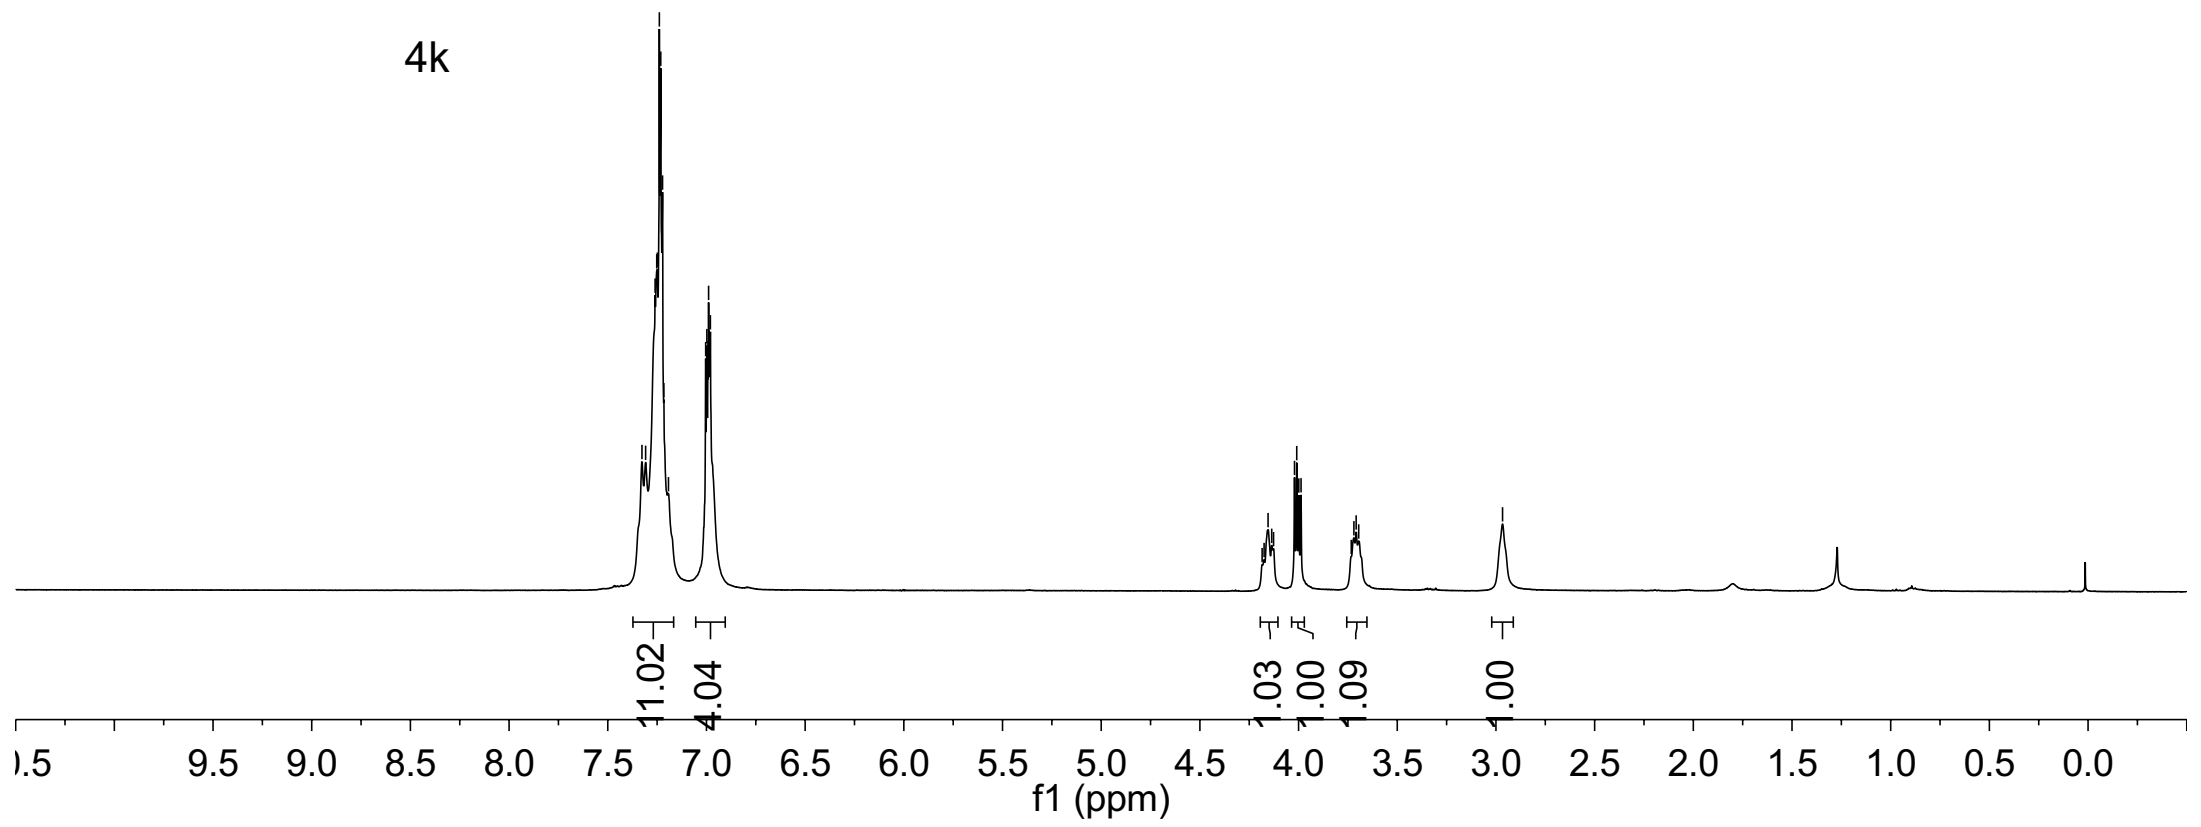



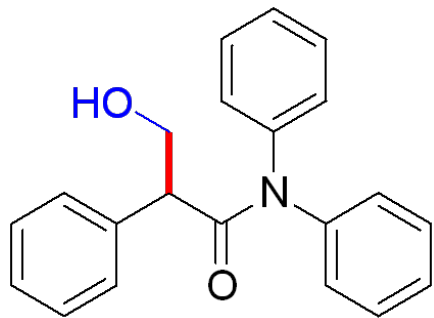

4k

172.952

142.425

141.641

136.109

129.311

129.200

128.899

128.546

128.129

127.884

127.276

126.353

126.313

77.212

77.000

76.788

65.672

52.925

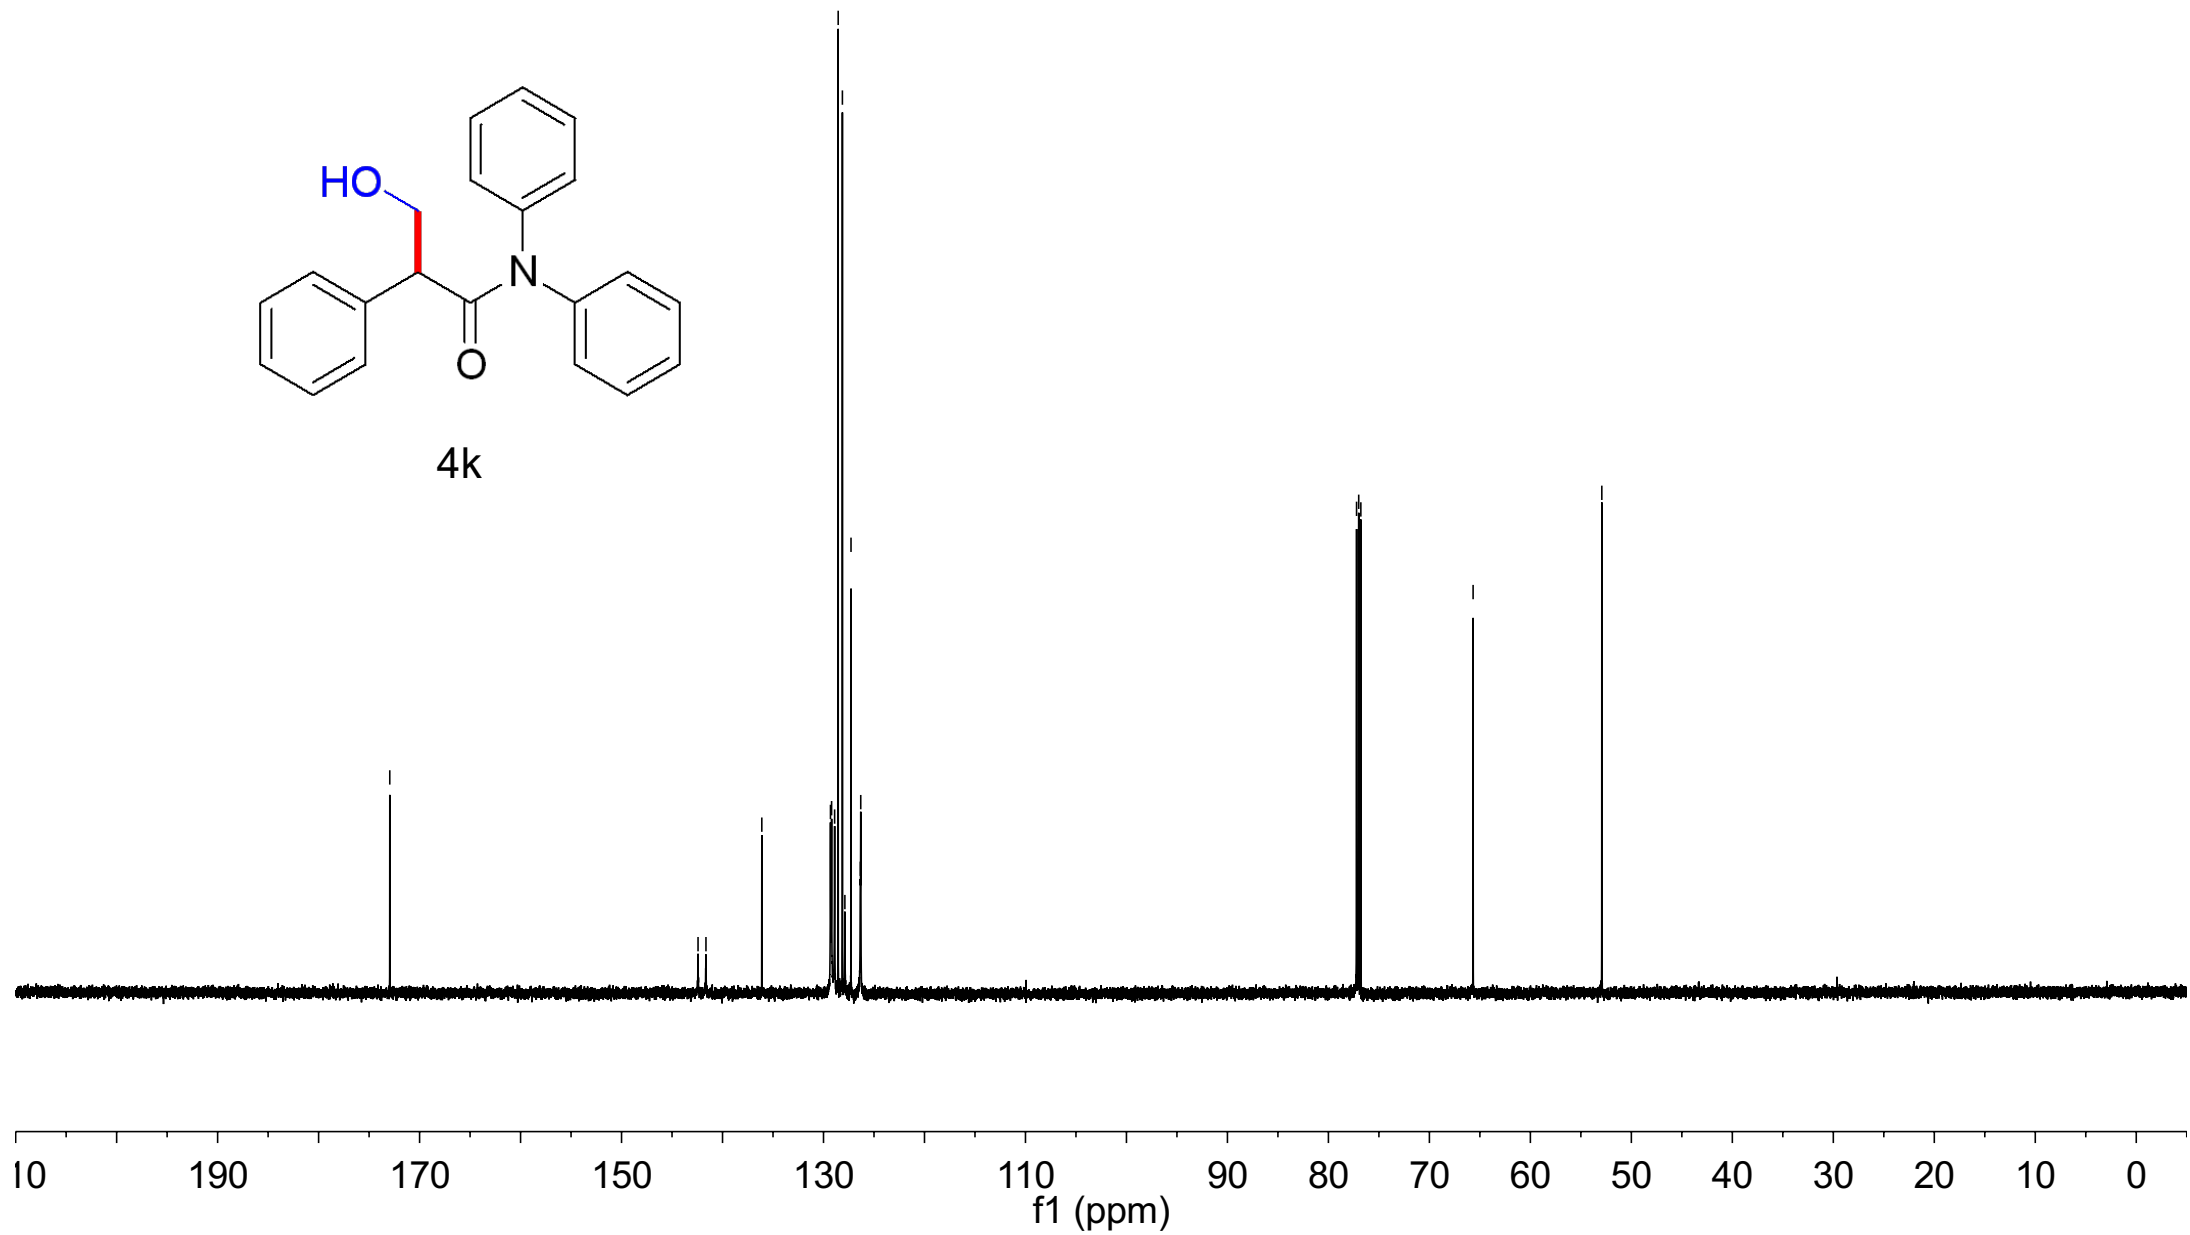

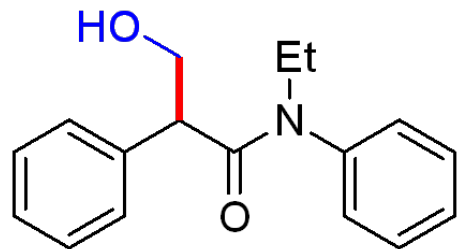

4I

7.413  
7.301  
7.284  
7.260  
7.244  
7.183  
7.177  
7.169  
7.166  
7.155  
7.144  
6.897  
6.892  
6.884  
6.873  
6.829

3.787  
3.770  
3.752  
3.719  
3.702  
3.691  
3.685  
3.679  
3.666  
3.653  
3.606

1.112  
1.094  
1.076

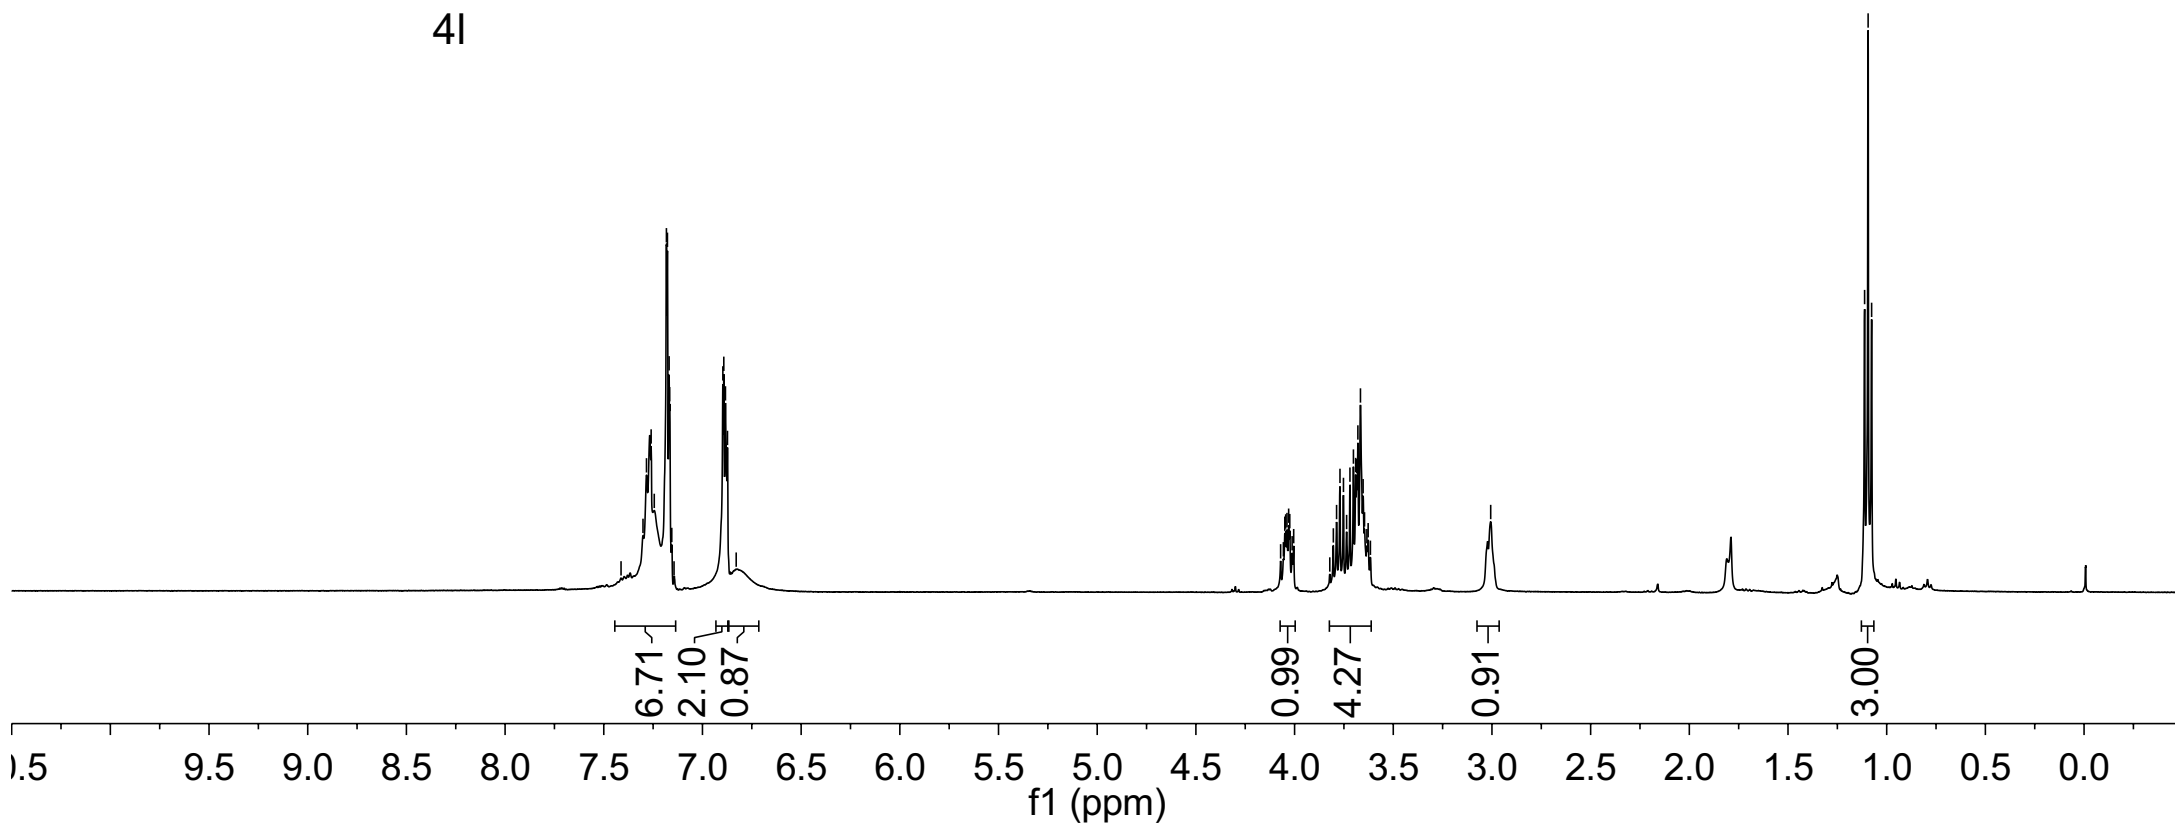

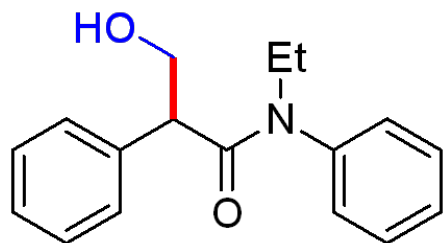

4l

—172.04

141.11  
136.69  
129.19  
128.93  
128.40  
128.10  
127.91  
127.04

77.21  
77.00  
76.79

—65.72

—52.26

—44.31

—12.89



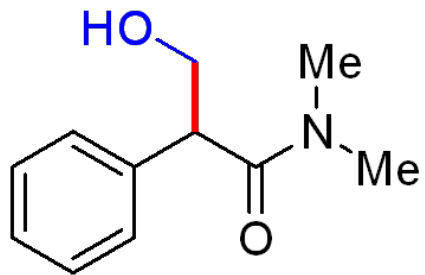

4m

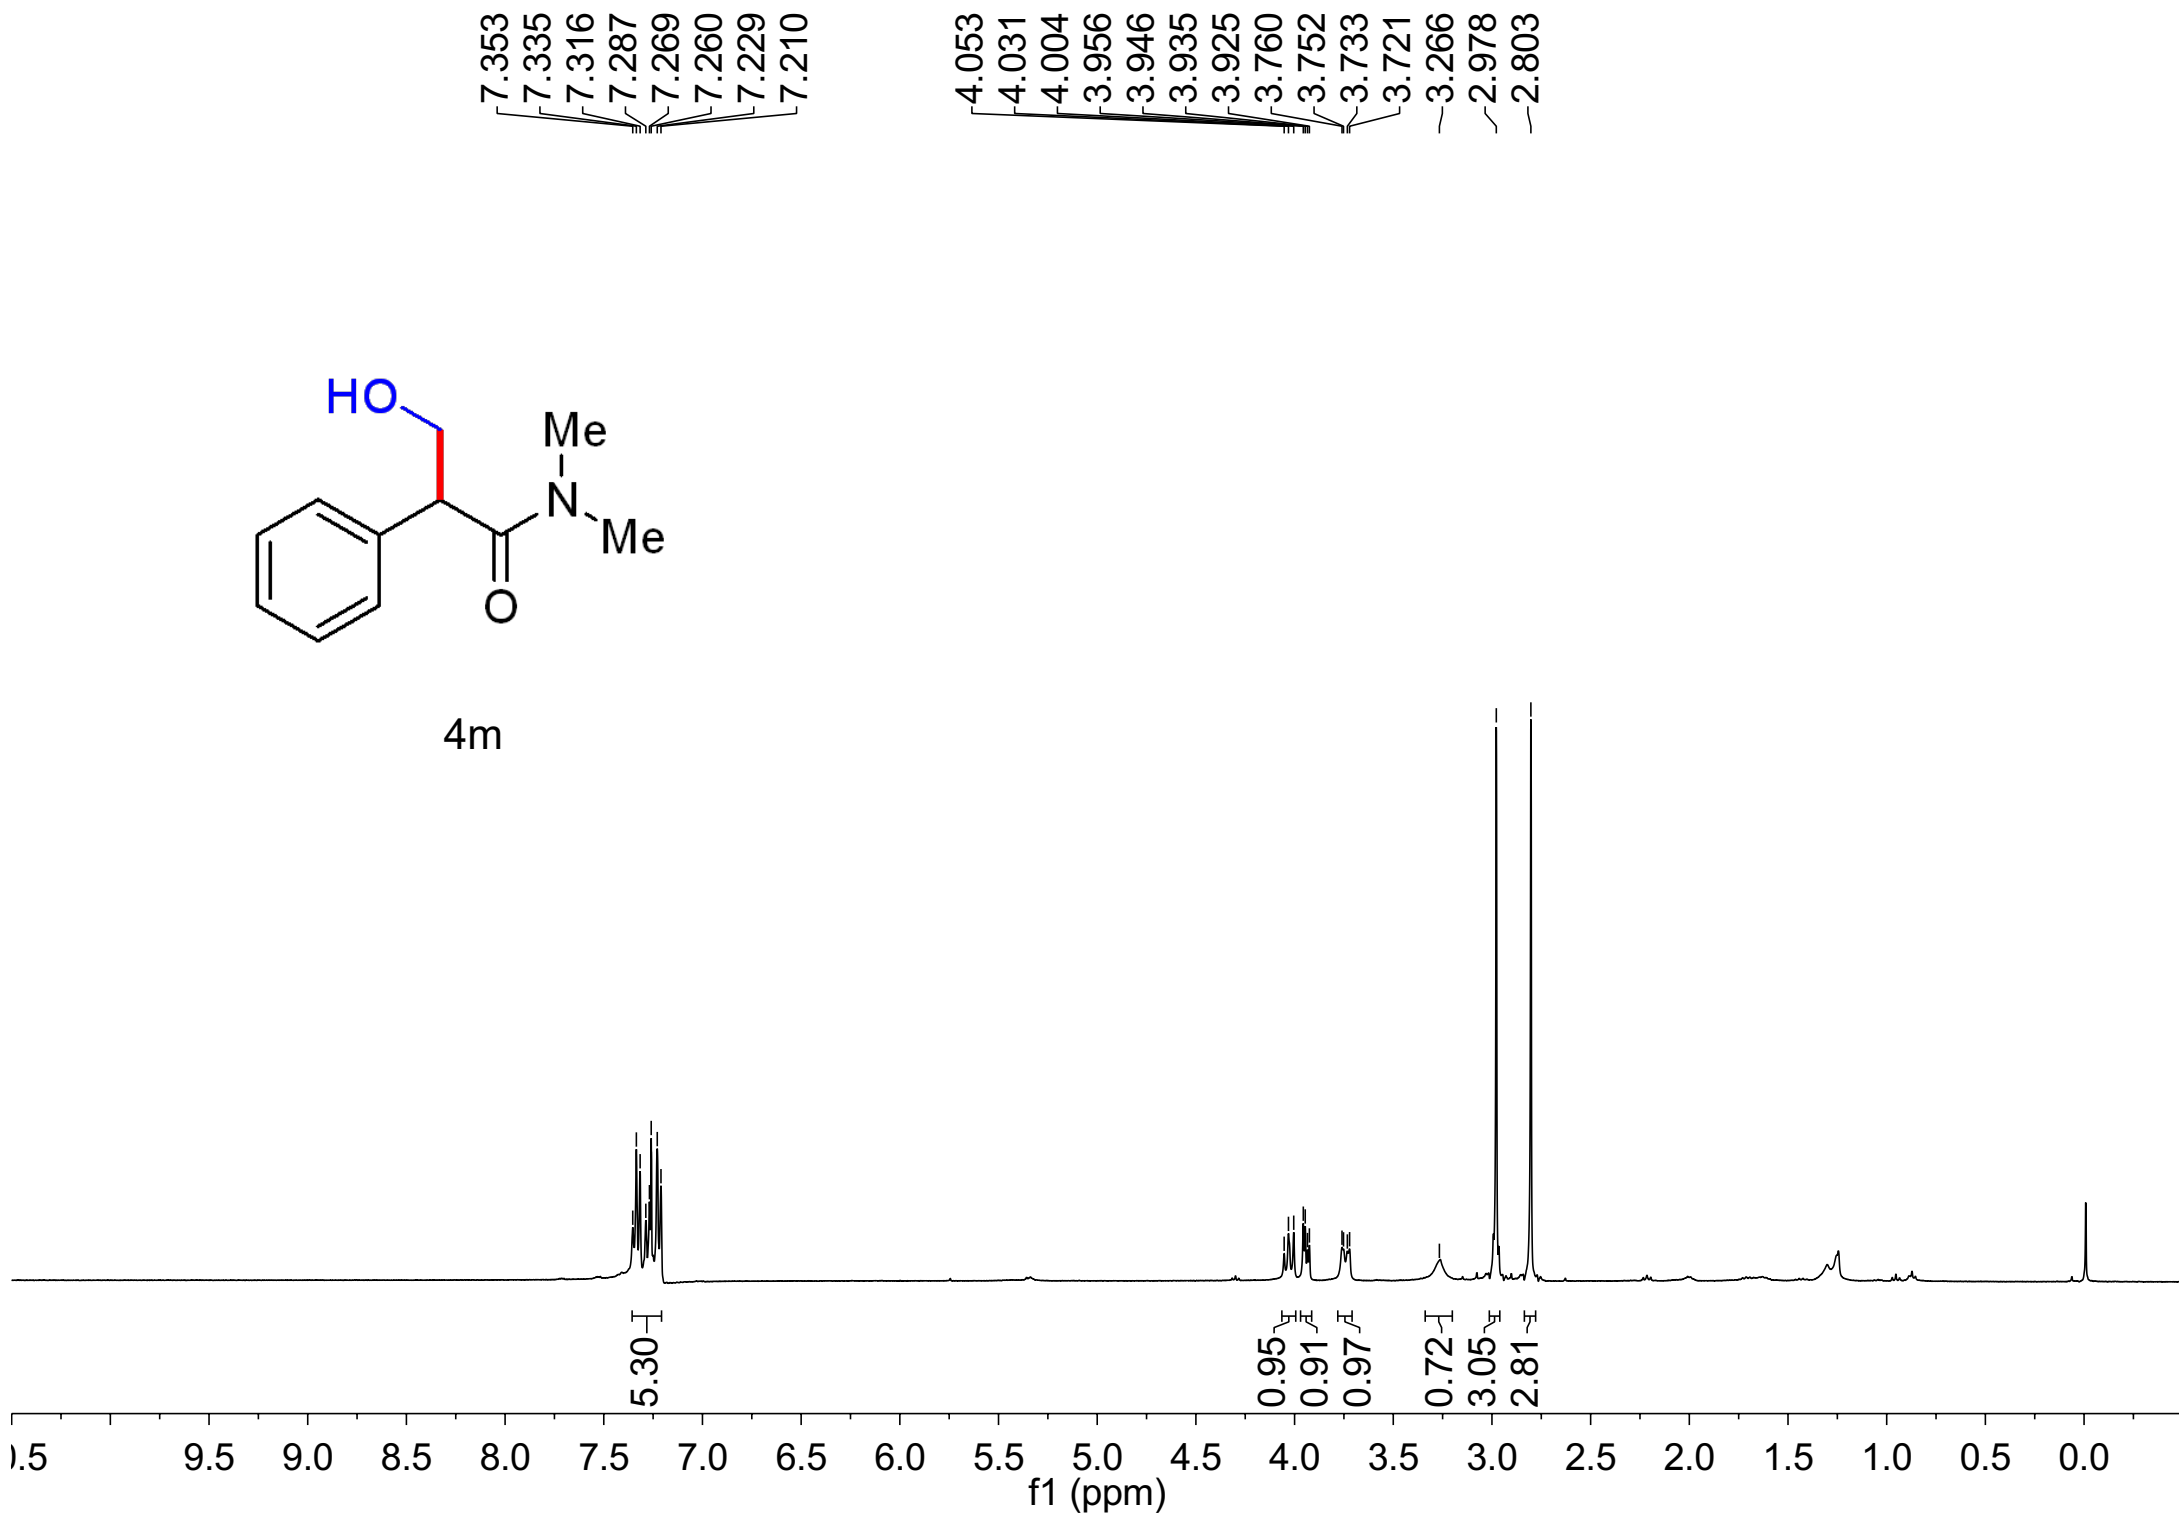

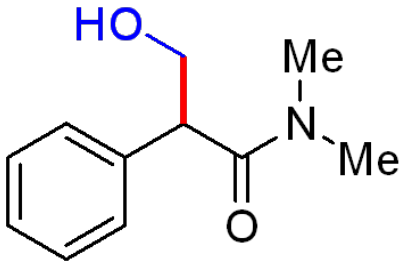

4m

—172.66

136.16  
129.01  
128.00  
127.40

77.21  
77.00  
76.79

—66.00

—51.97

37.00  
35.62

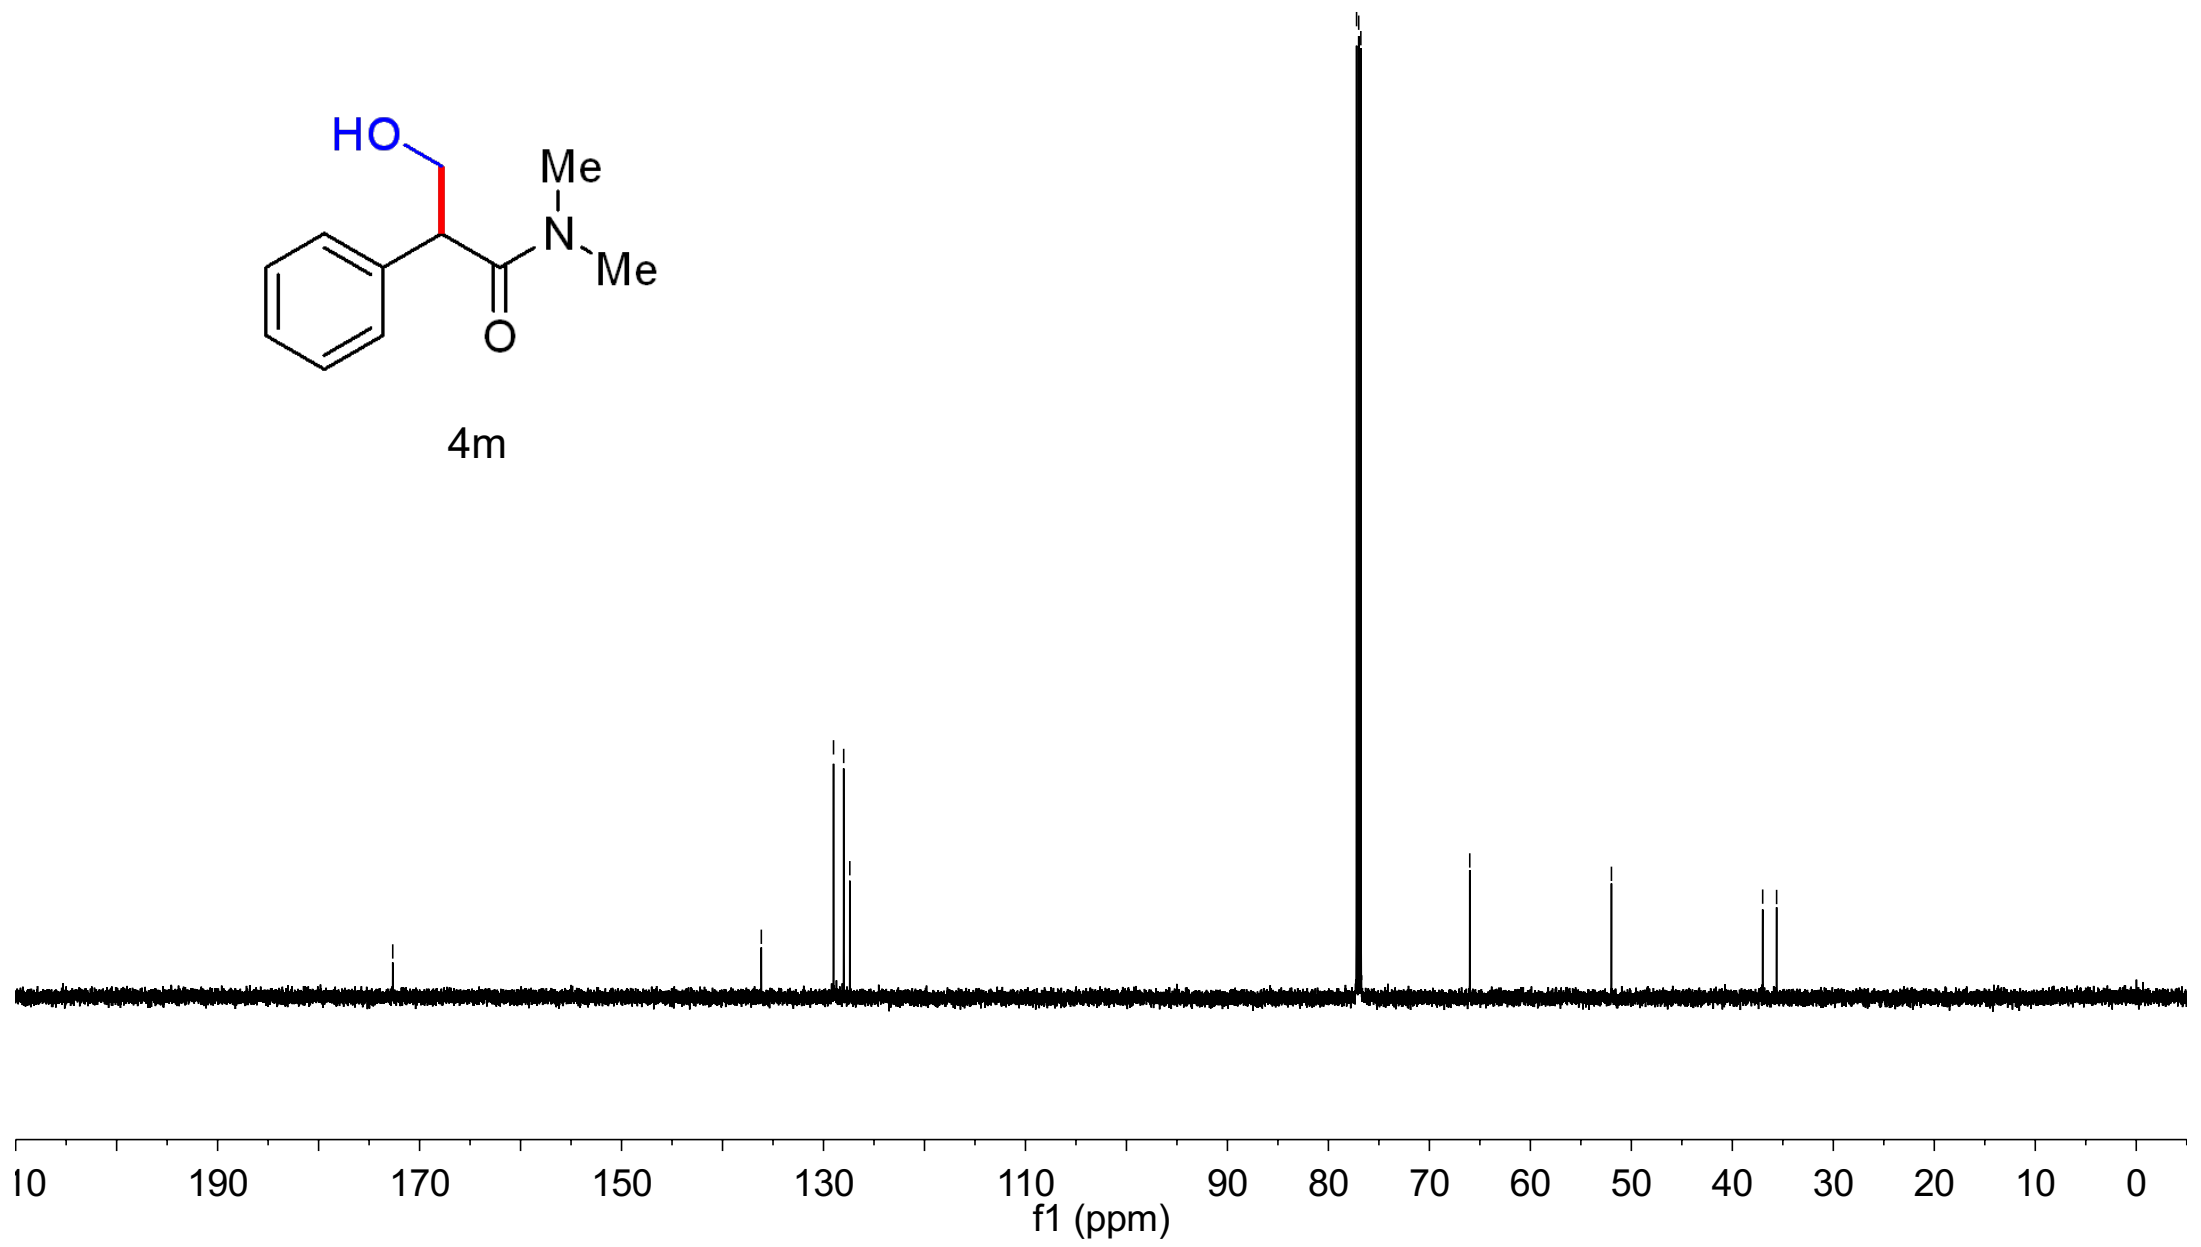

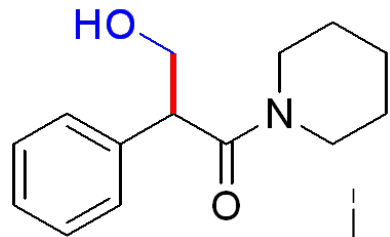

4n

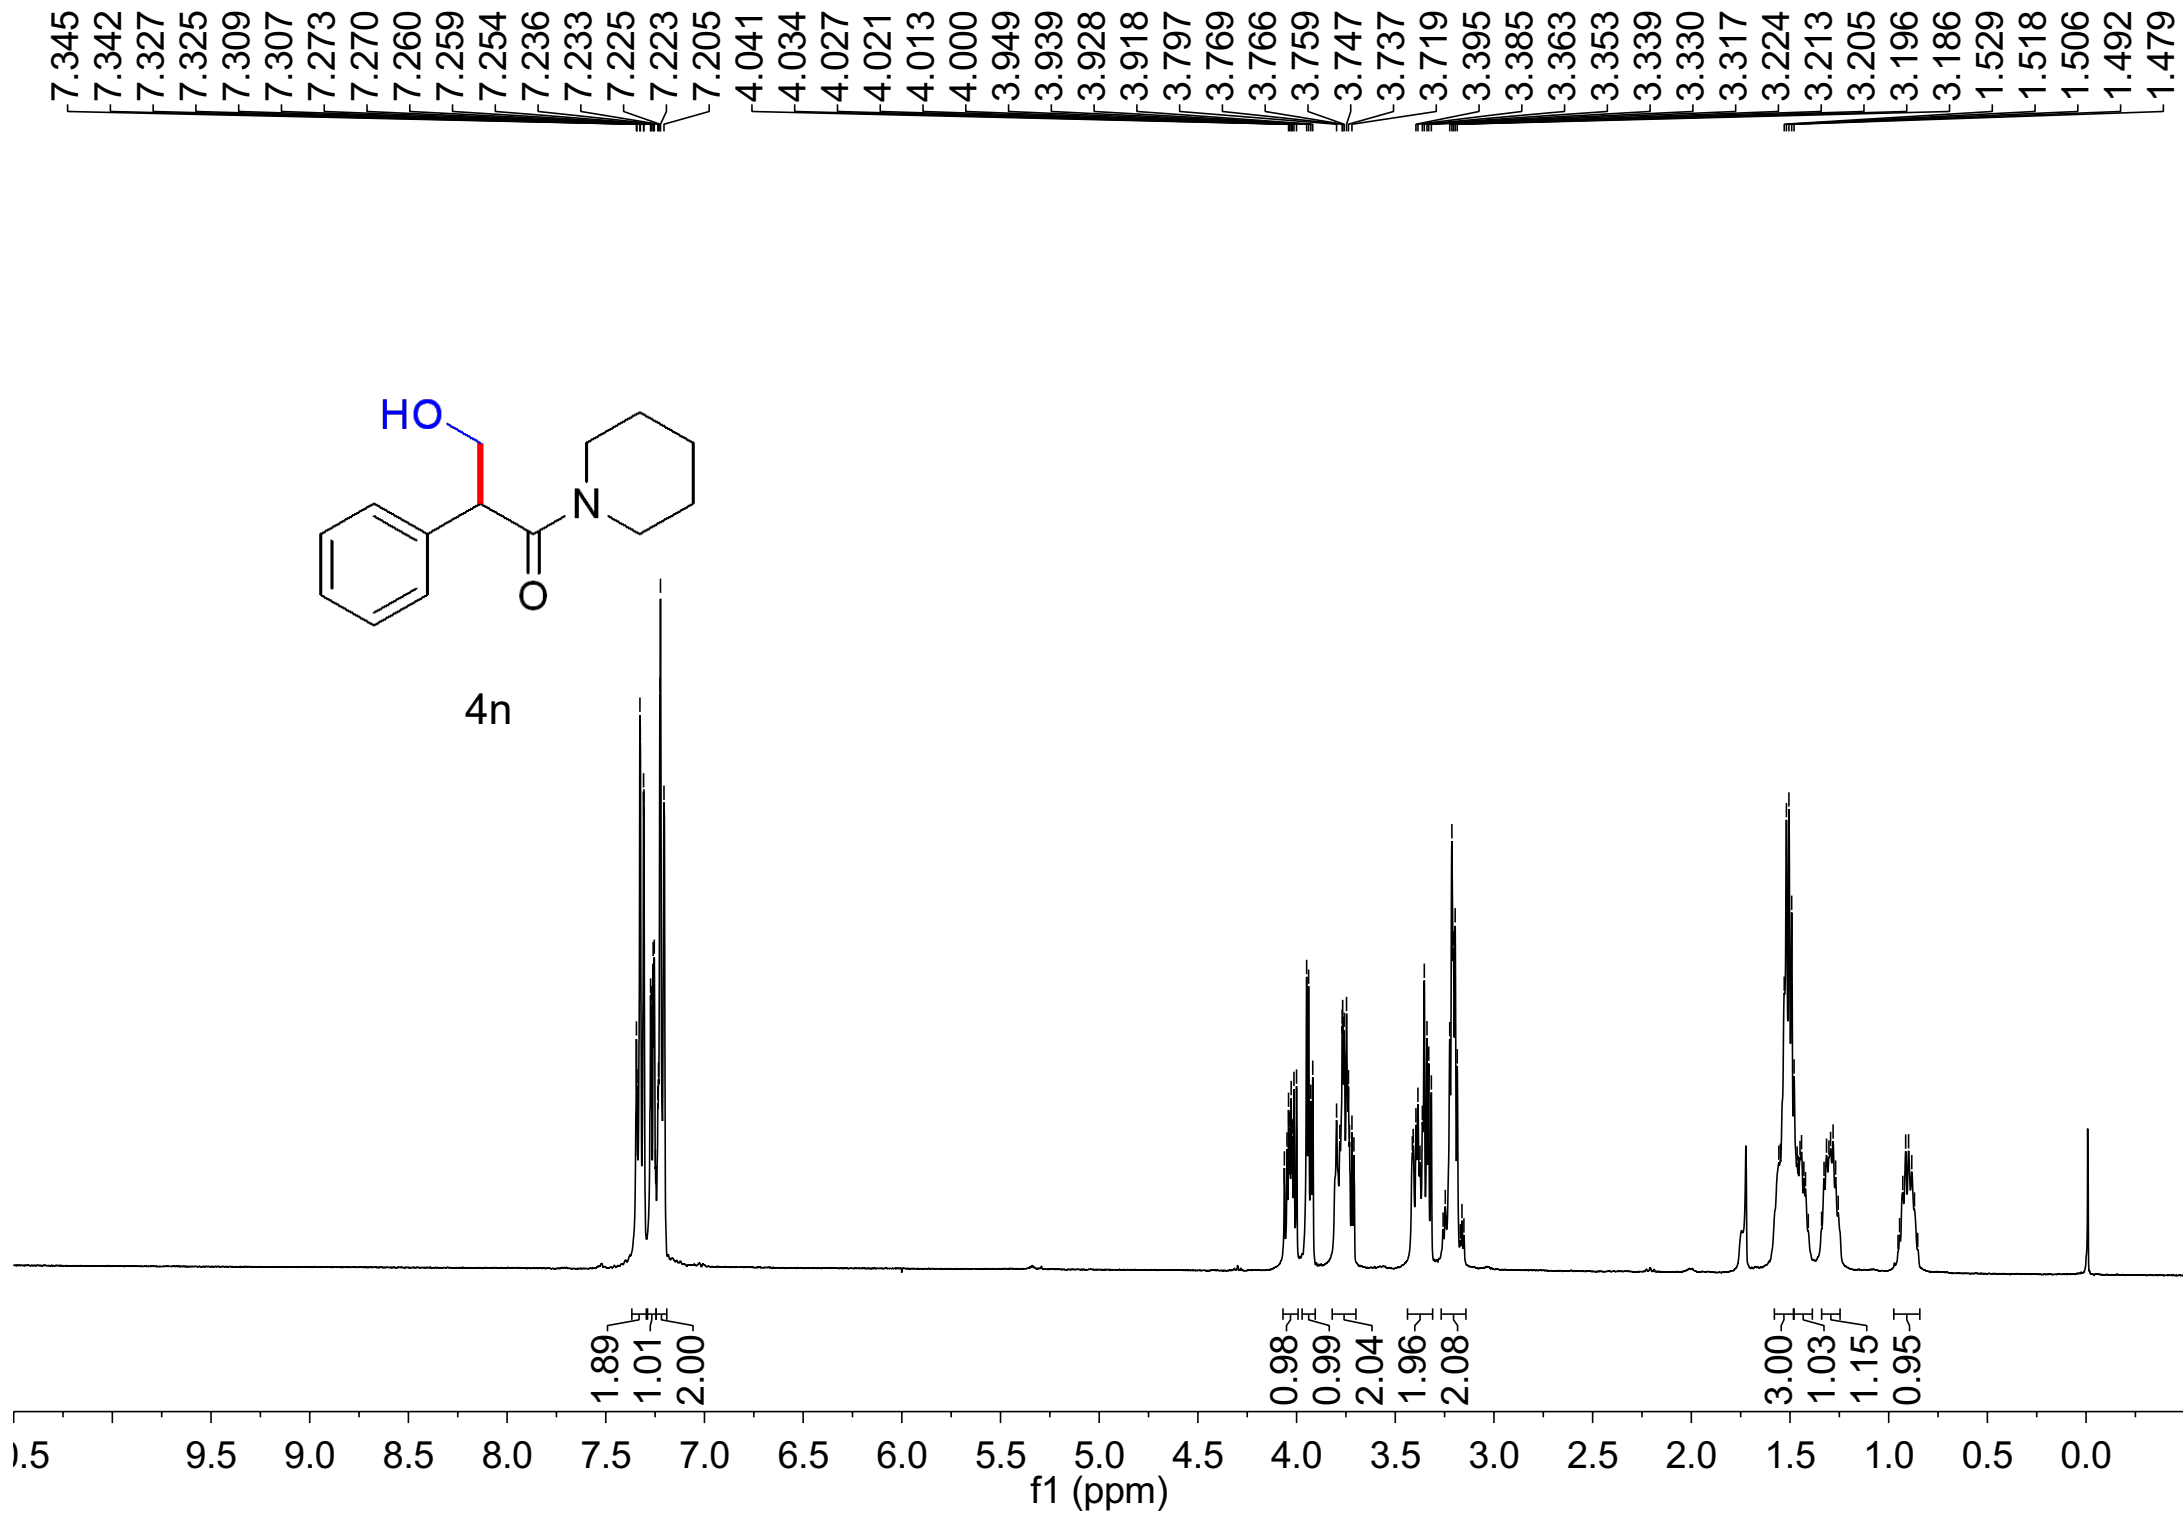

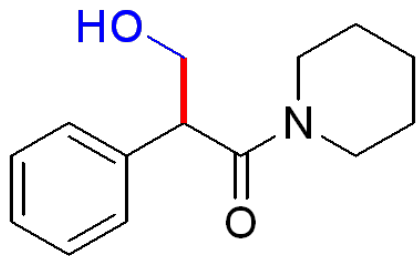

4n

170.70

136.63

128.94

127.97

127.27

77.21

77.00

76.79

66.01

51.76

46.42

42.85

25.55

25.43

24.30



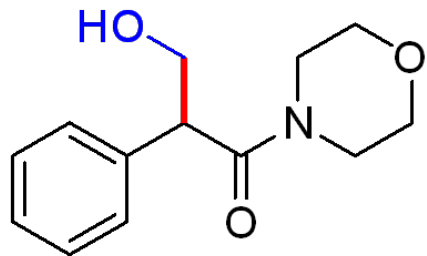

4o

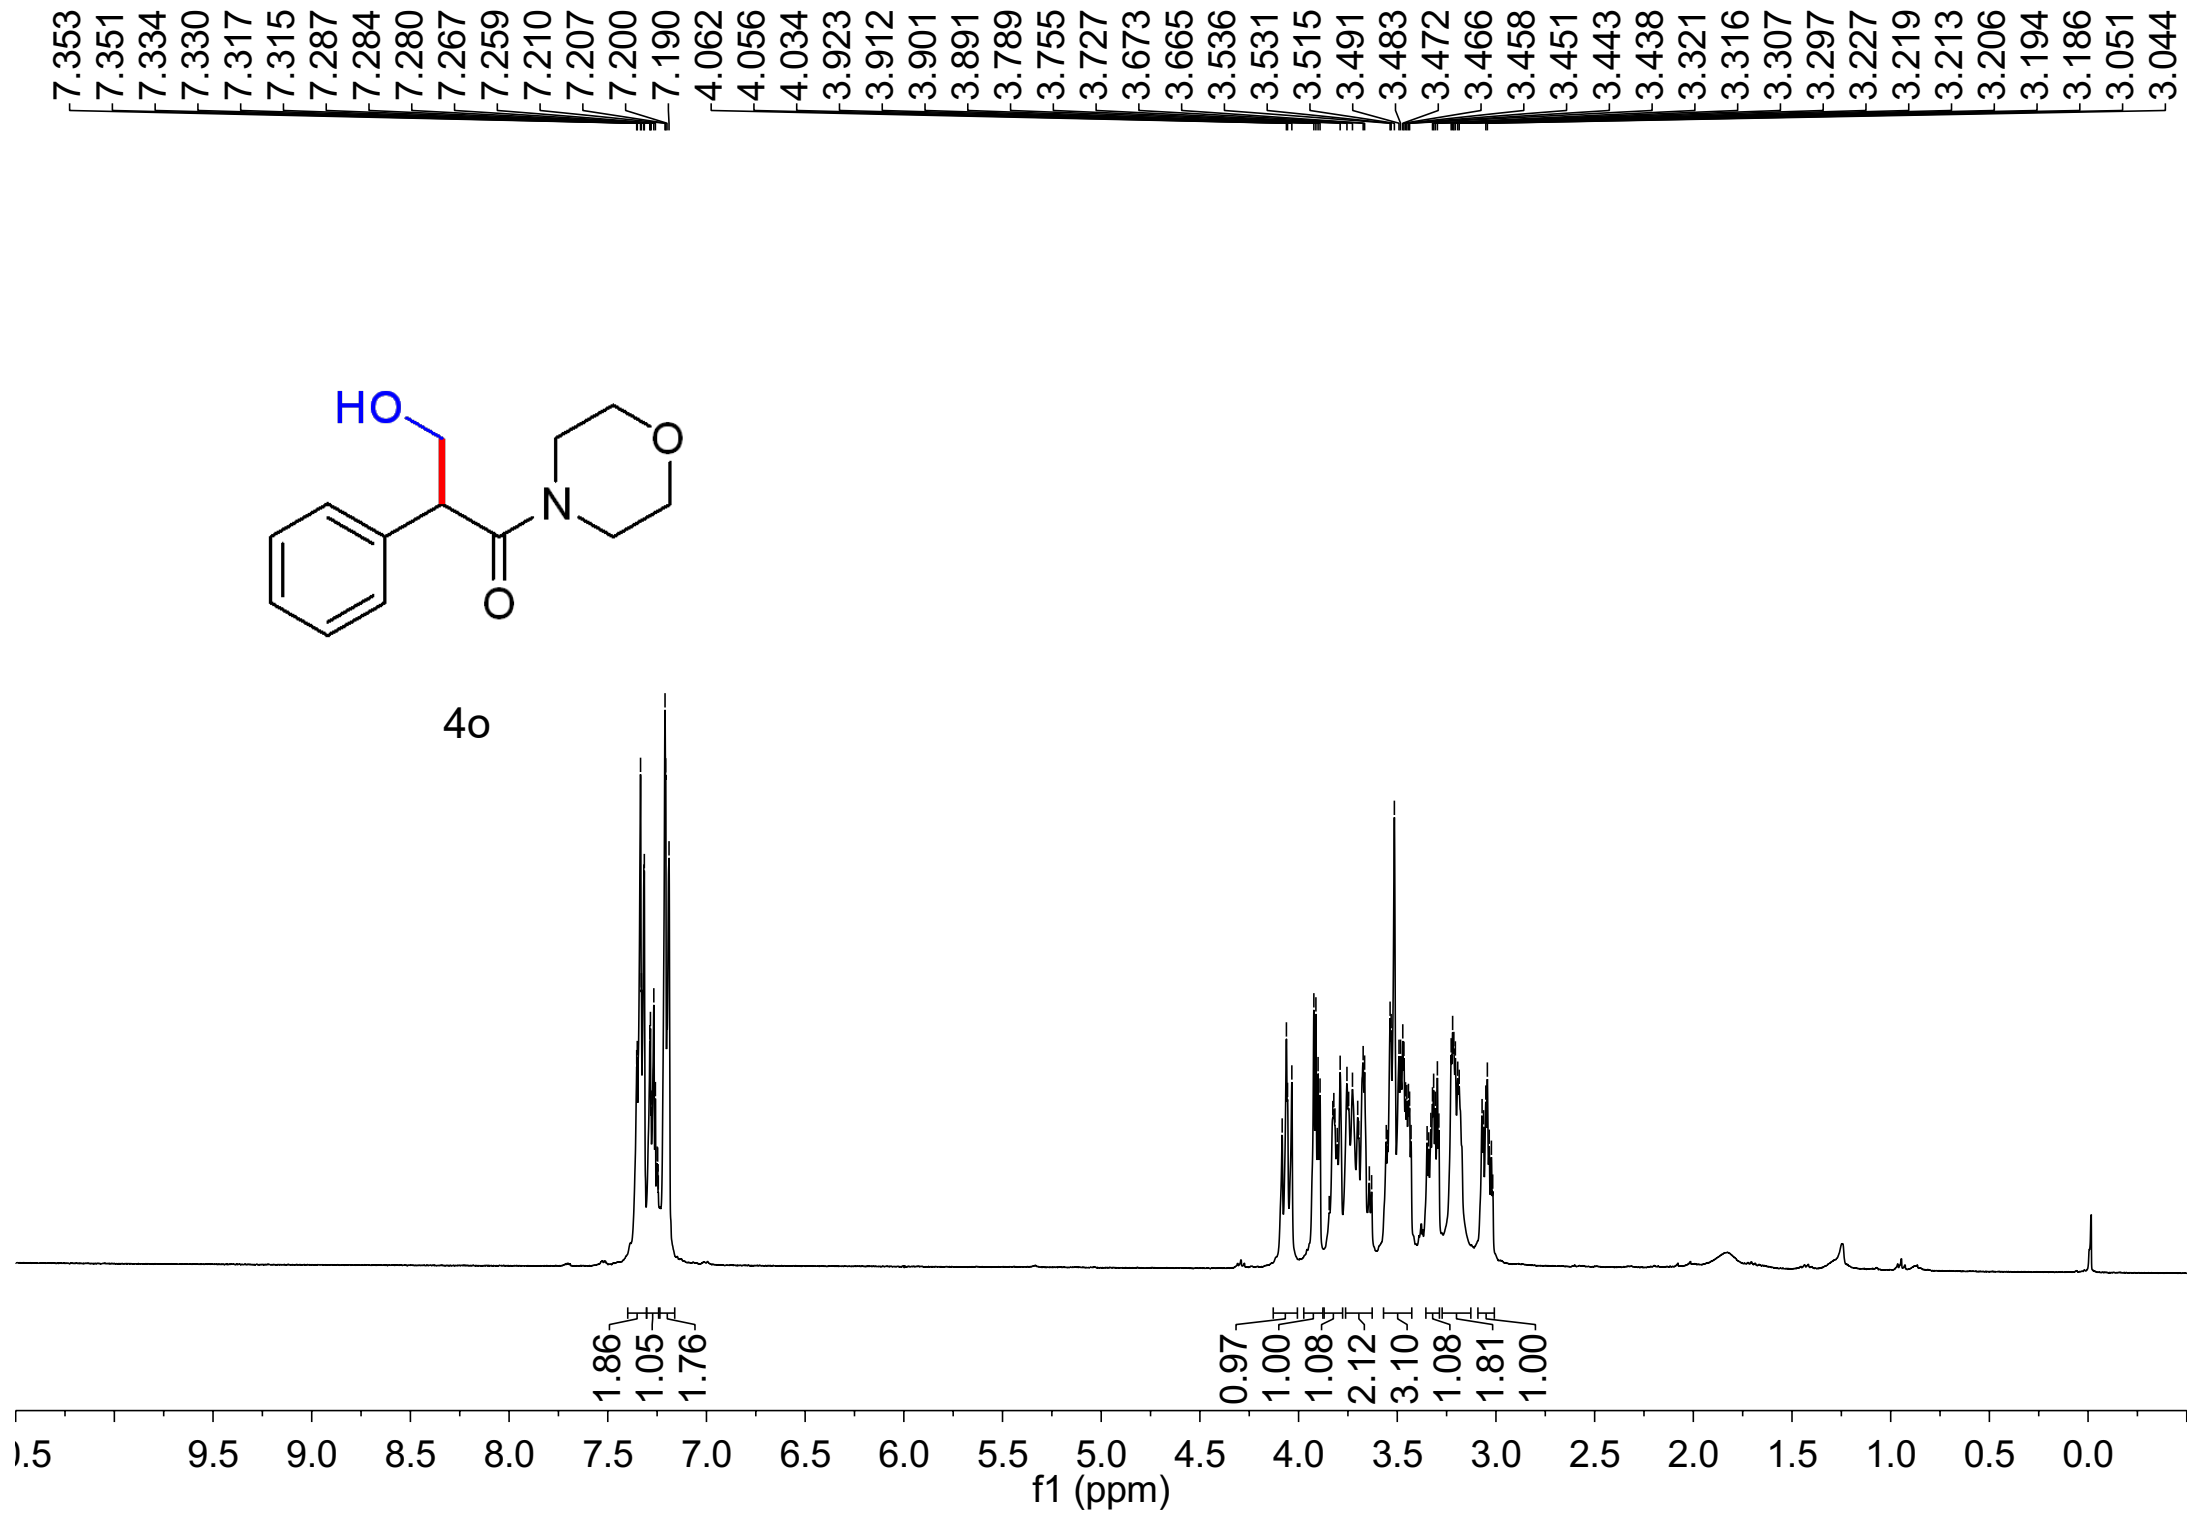



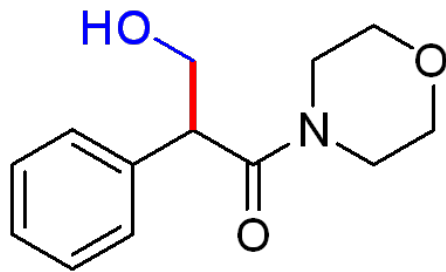

4o

—171.10

136.04  
129.12  
127.86  
127.57

77.21  
77.00  
76.79  
66.59  
66.04  
65.73

51.78  
45.79  
42.12



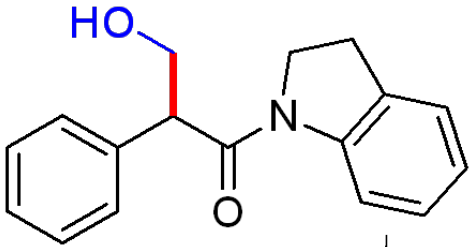

4p

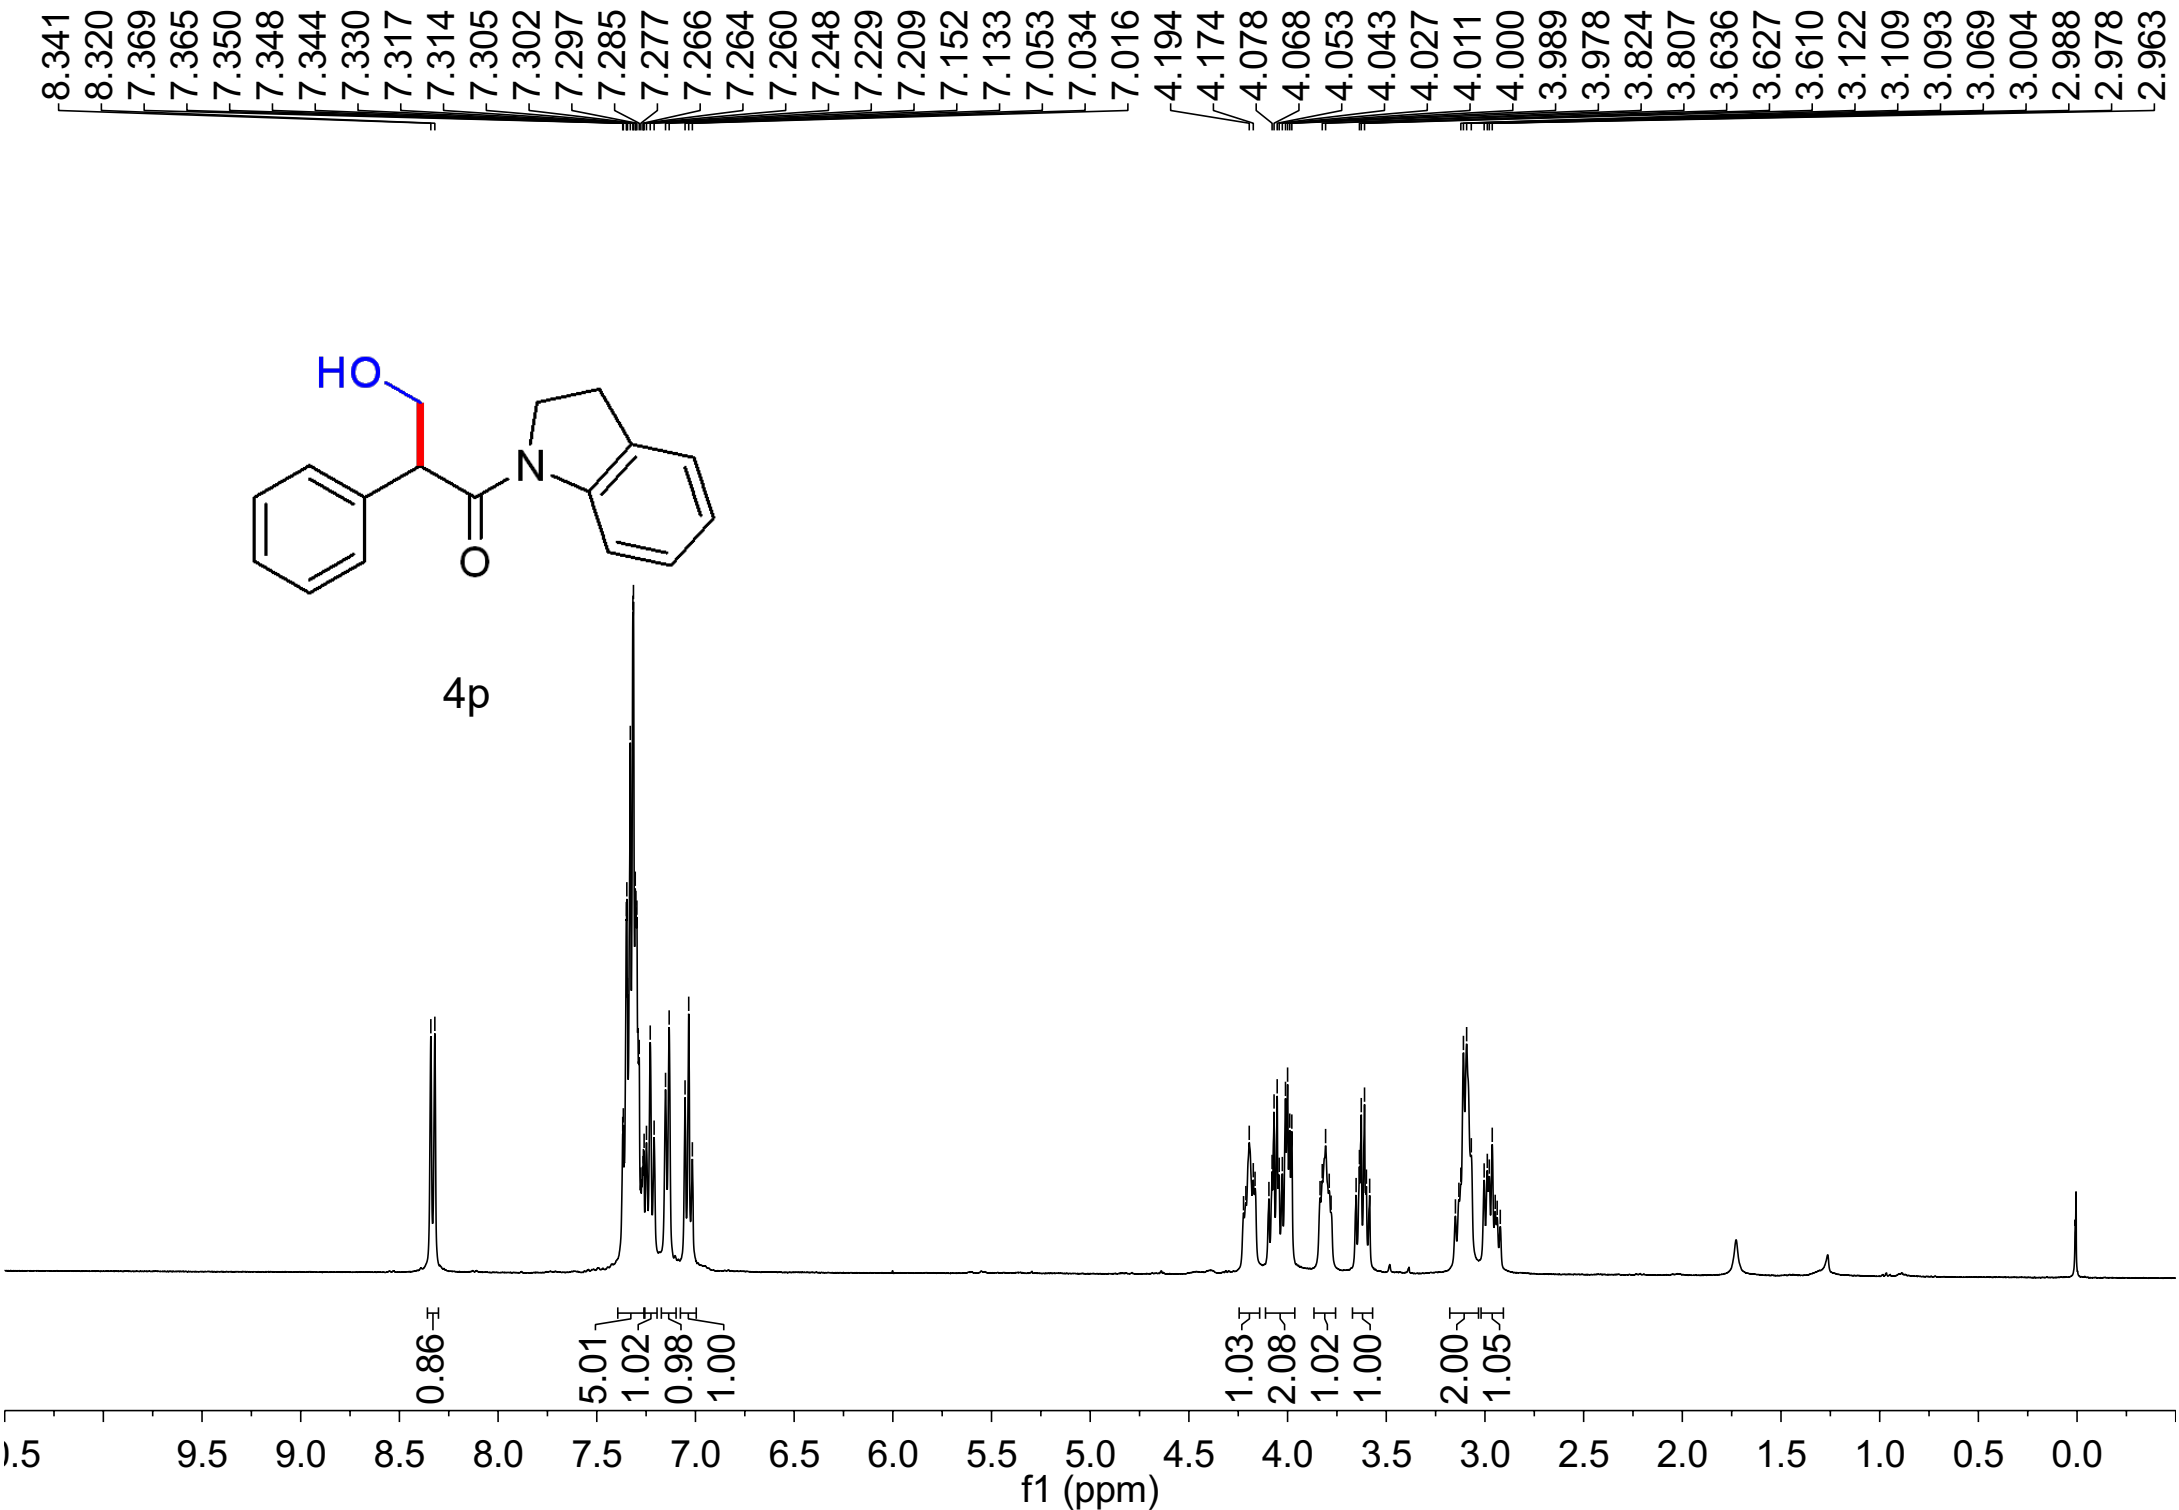

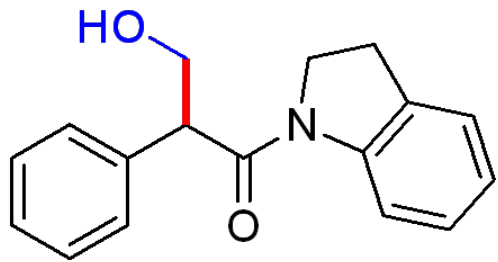

4p

—170.79

142.82

135.31

131.19

129.10

128.23

127.66

127.49

124.57

124.14

117.28

77.21

77.00

76.79

—65.73

—54.73

—47.52

—27.91



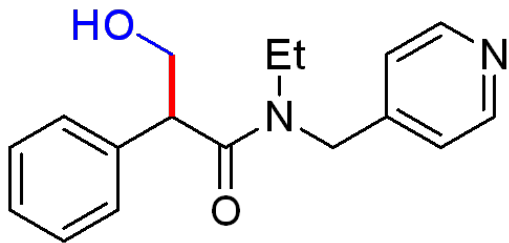

4q

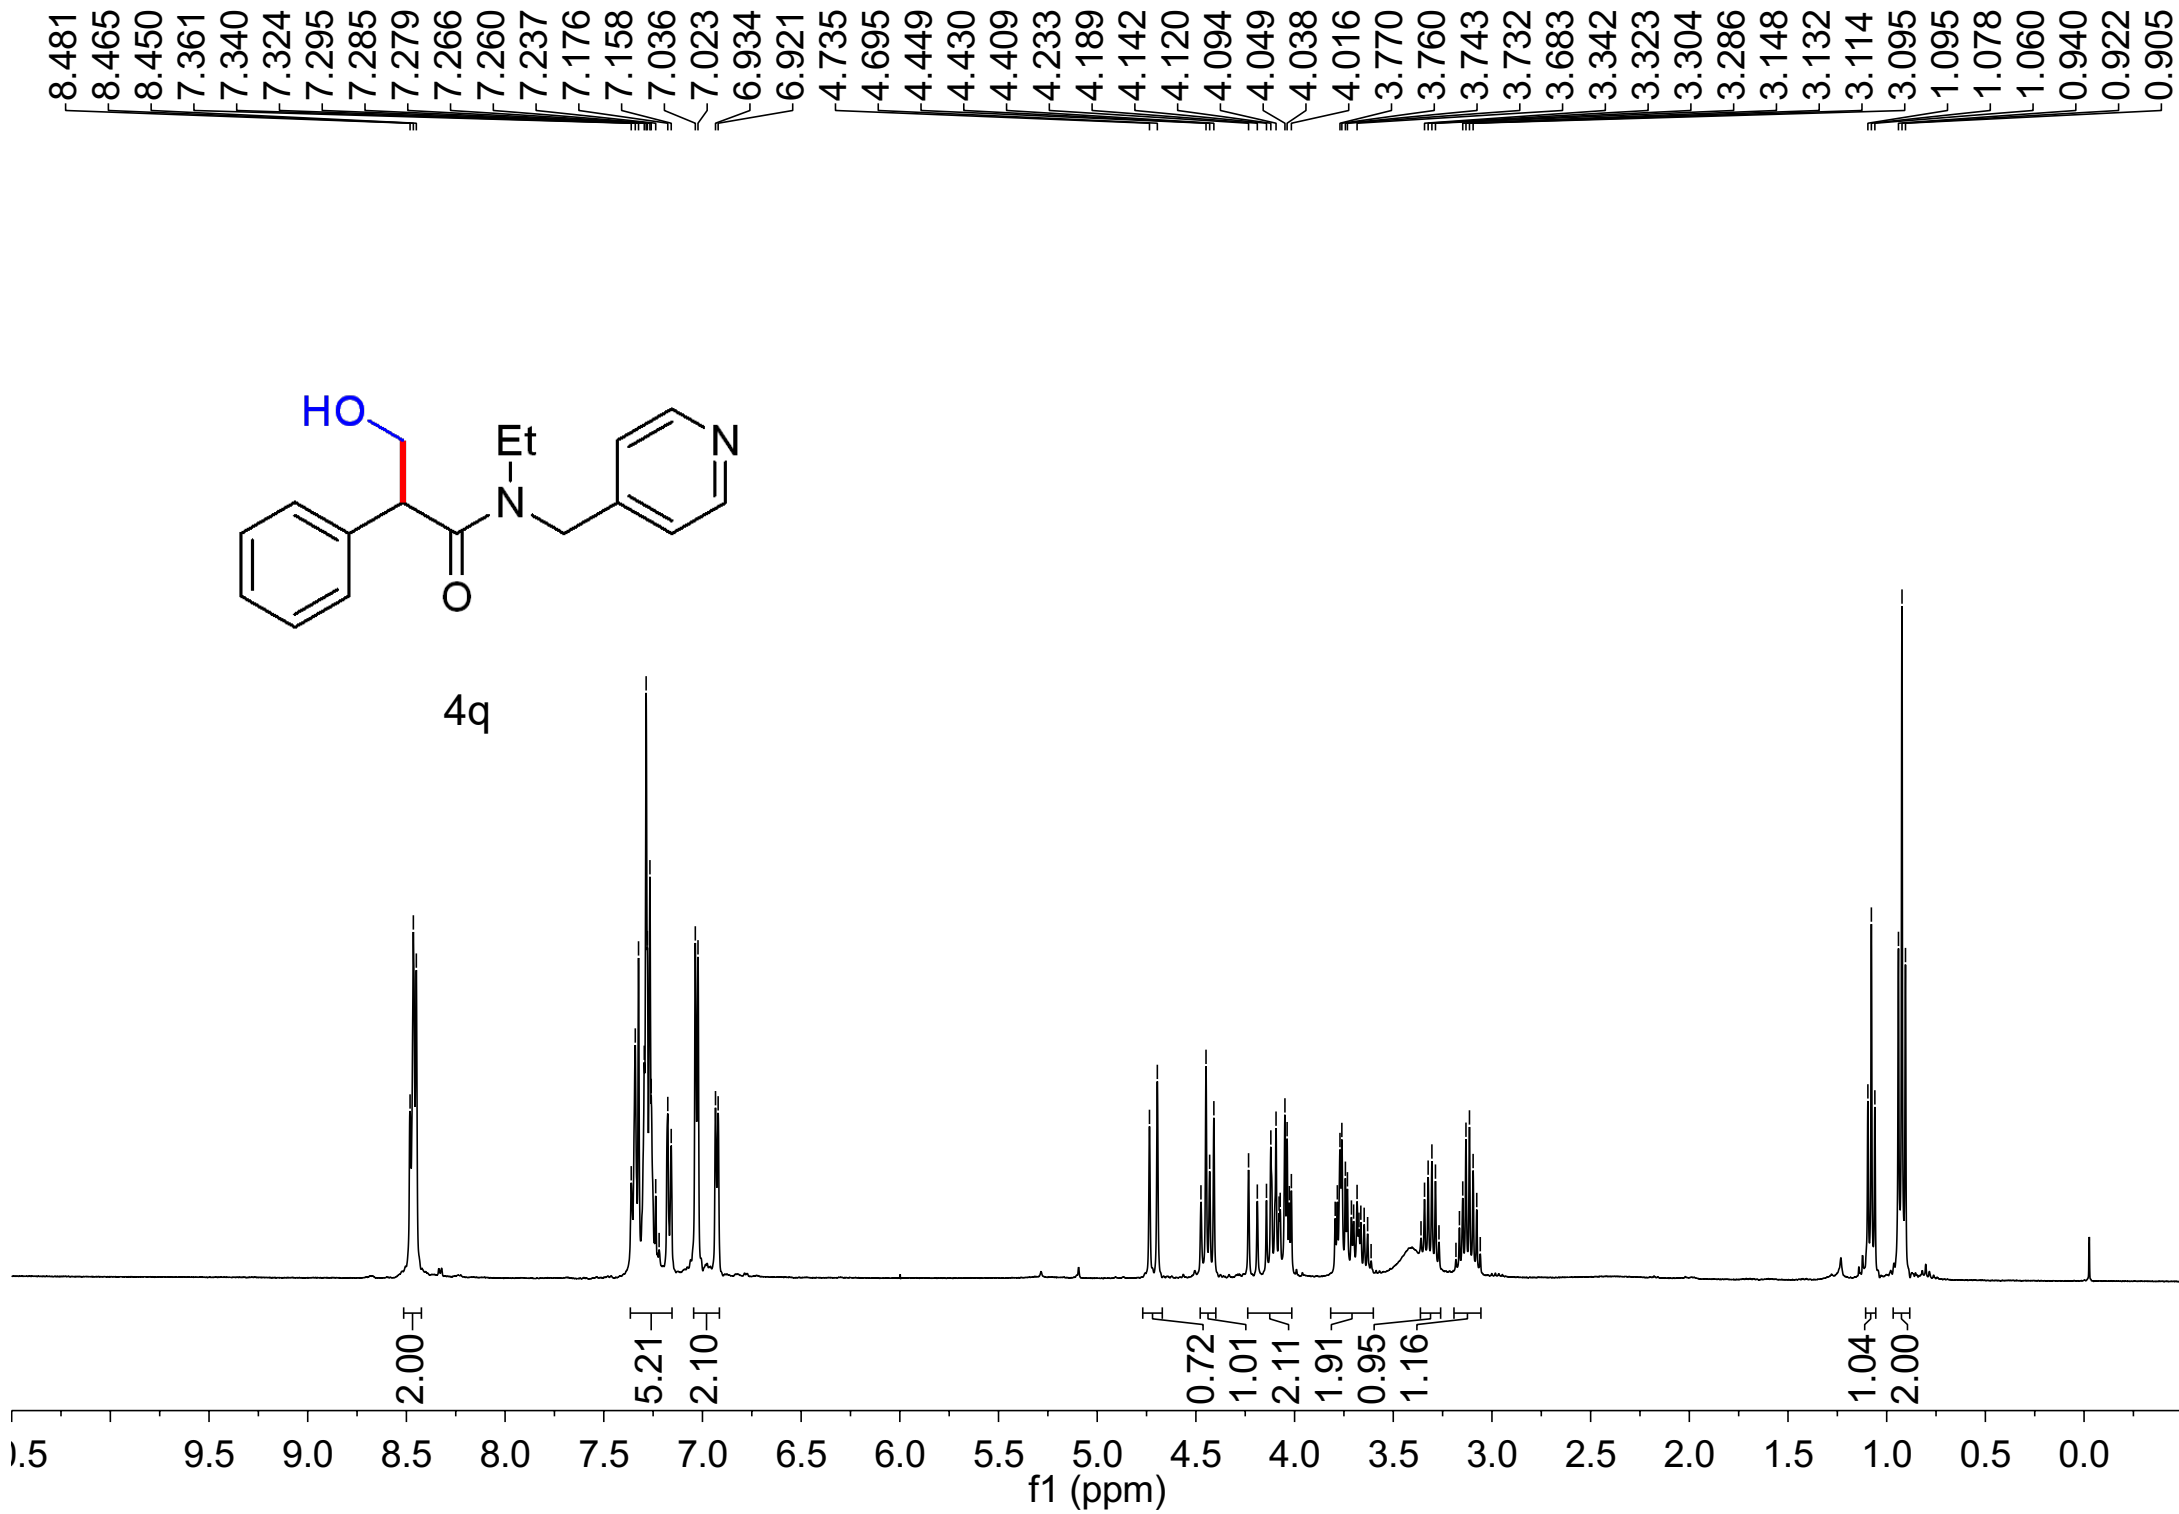

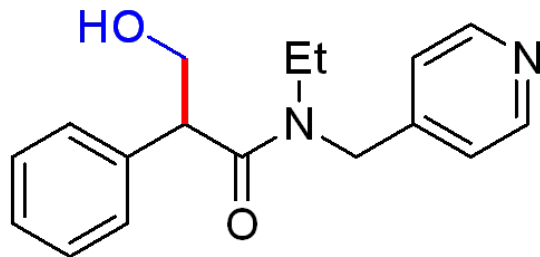

4q

172.71  
172.60

150.08  
149.81  
146.72  
145.85  
136.05  
135.78  
129.12  
129.04  
128.02  
127.82  
127.68  
127.64  
122.13  
121.26

77.21  
77.00  
76.79

65.79

51.99  
51.87  
49.19  
47.31  
42.15  
41.23

13.39  
12.25



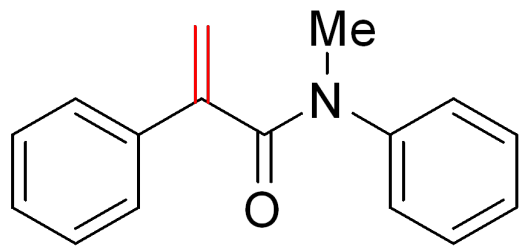

5

7.260  
7.198  
7.125  
6.928

5.463  
5.359

3.381

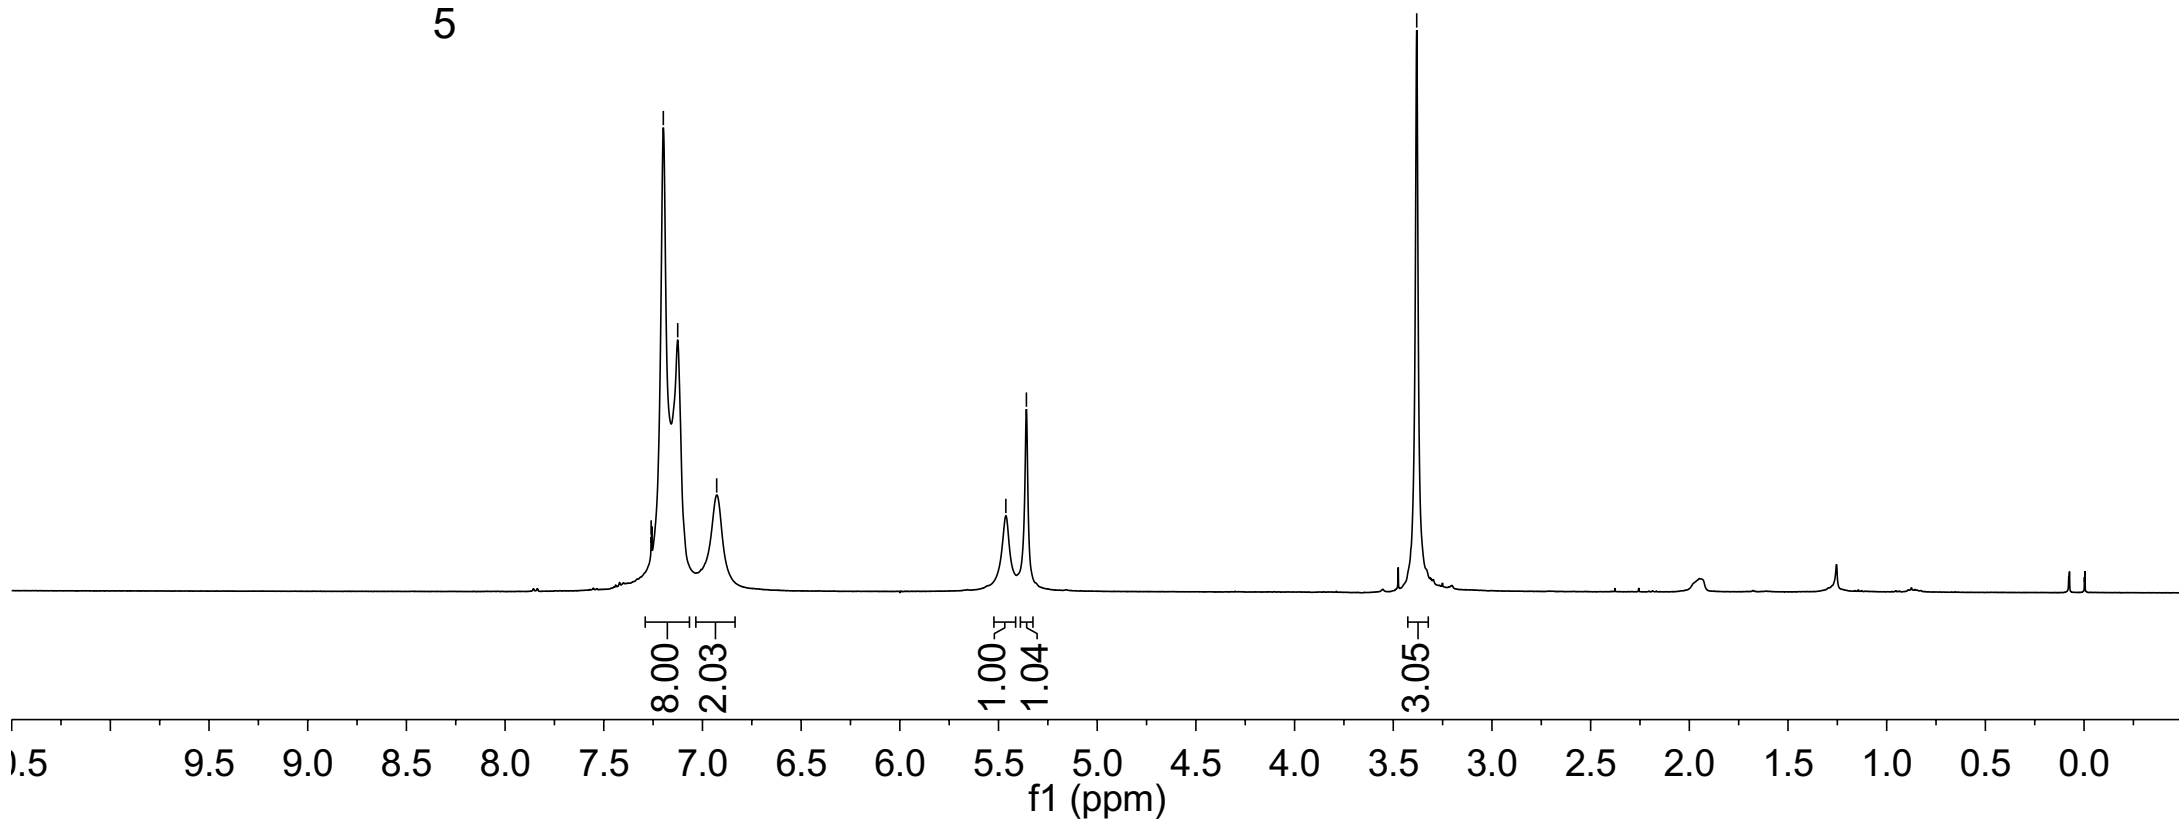

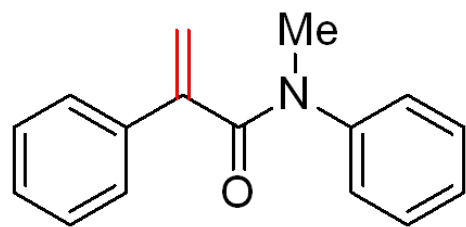

5

170.46  
145.67  
143.59  
136.82  
128.73  
128.16  
127.81  
126.85  
126.75  
125.96  
117.65

77.21  
77.00  
76.79

37.27

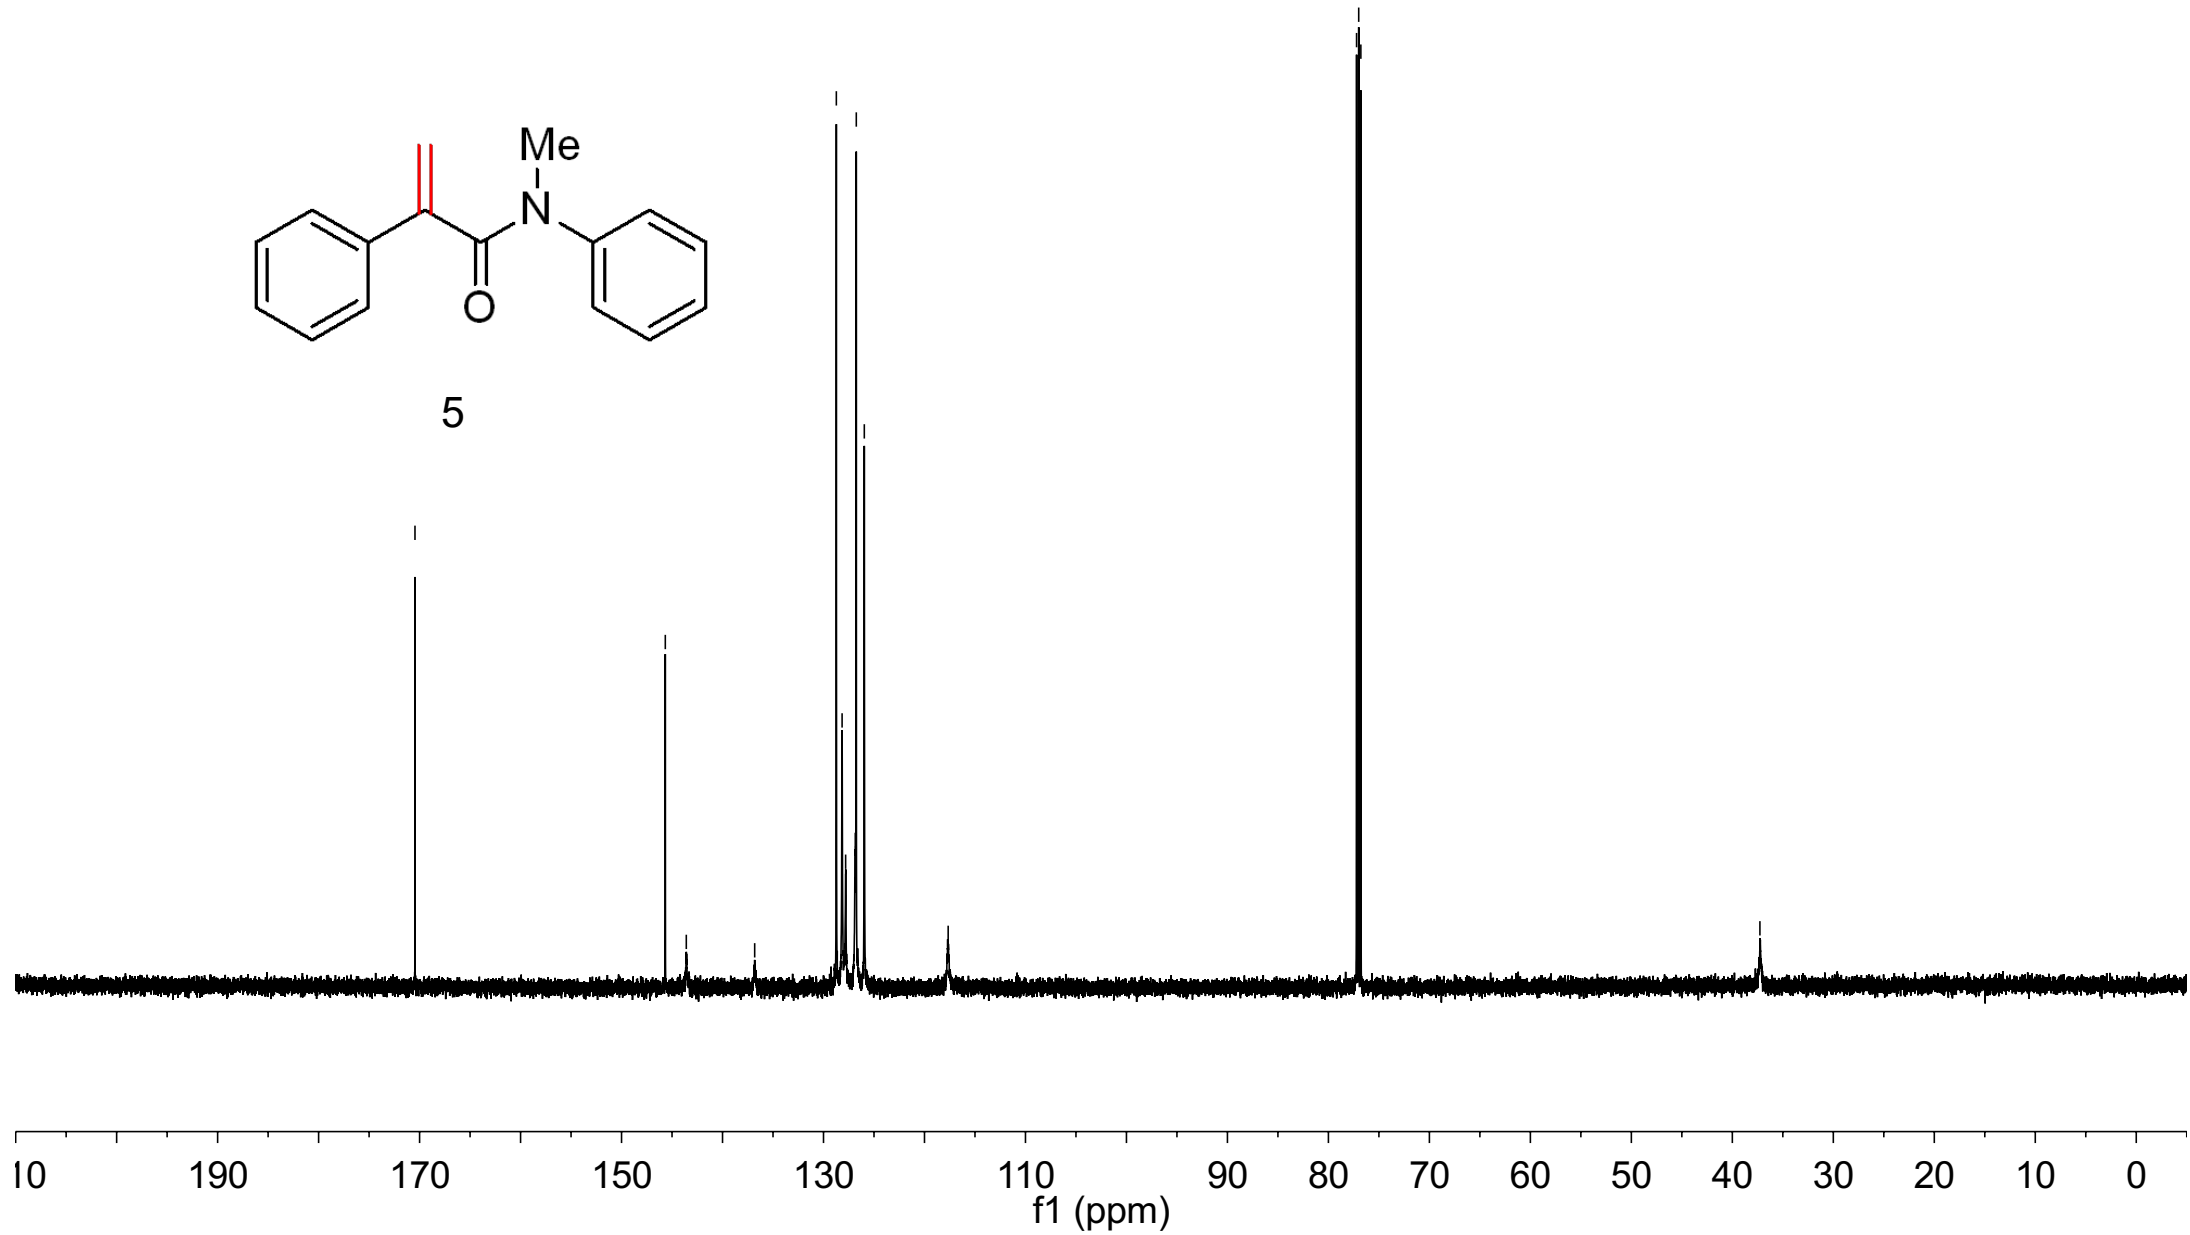

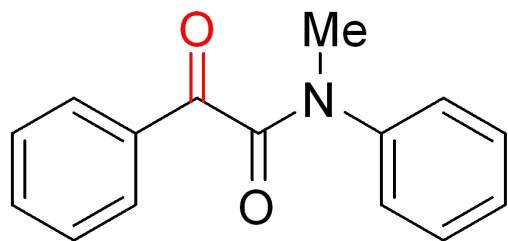

6

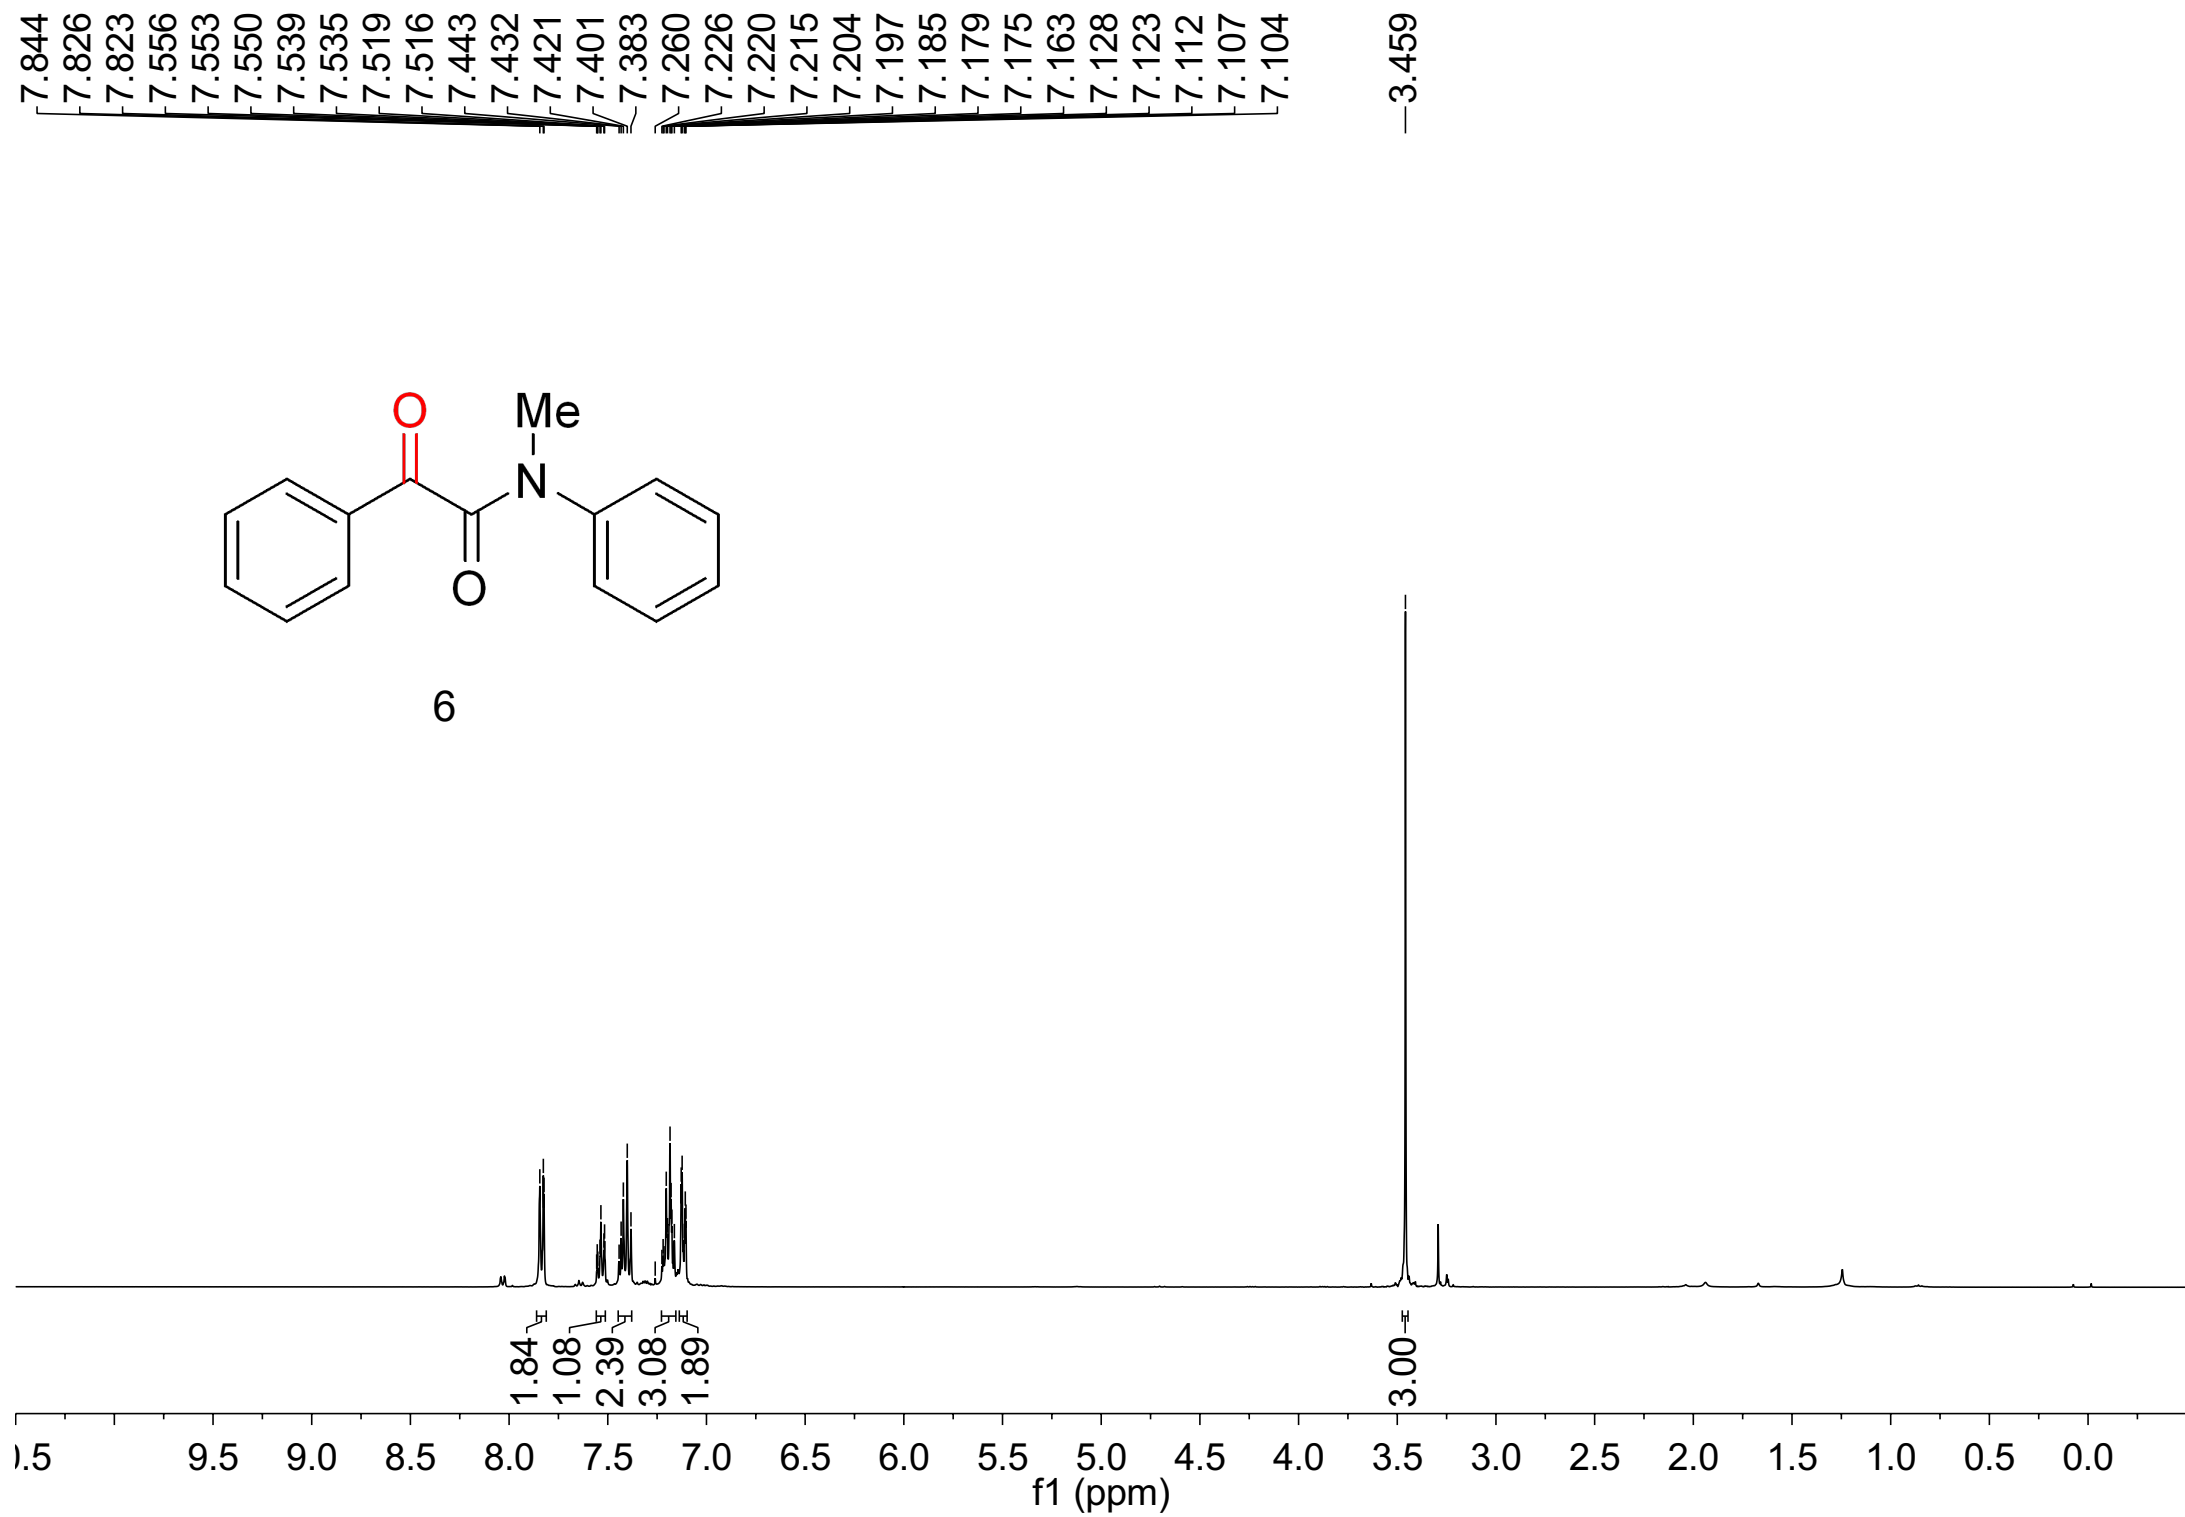



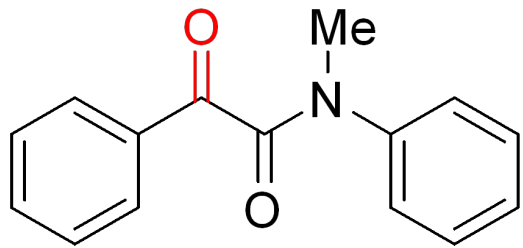

6

—190.67

—166.92

140.96  
134.12  
133.34  
129.34  
129.19  
128.61  
127.93  
126.58

77.21  
77.00  
76.79

—36.02

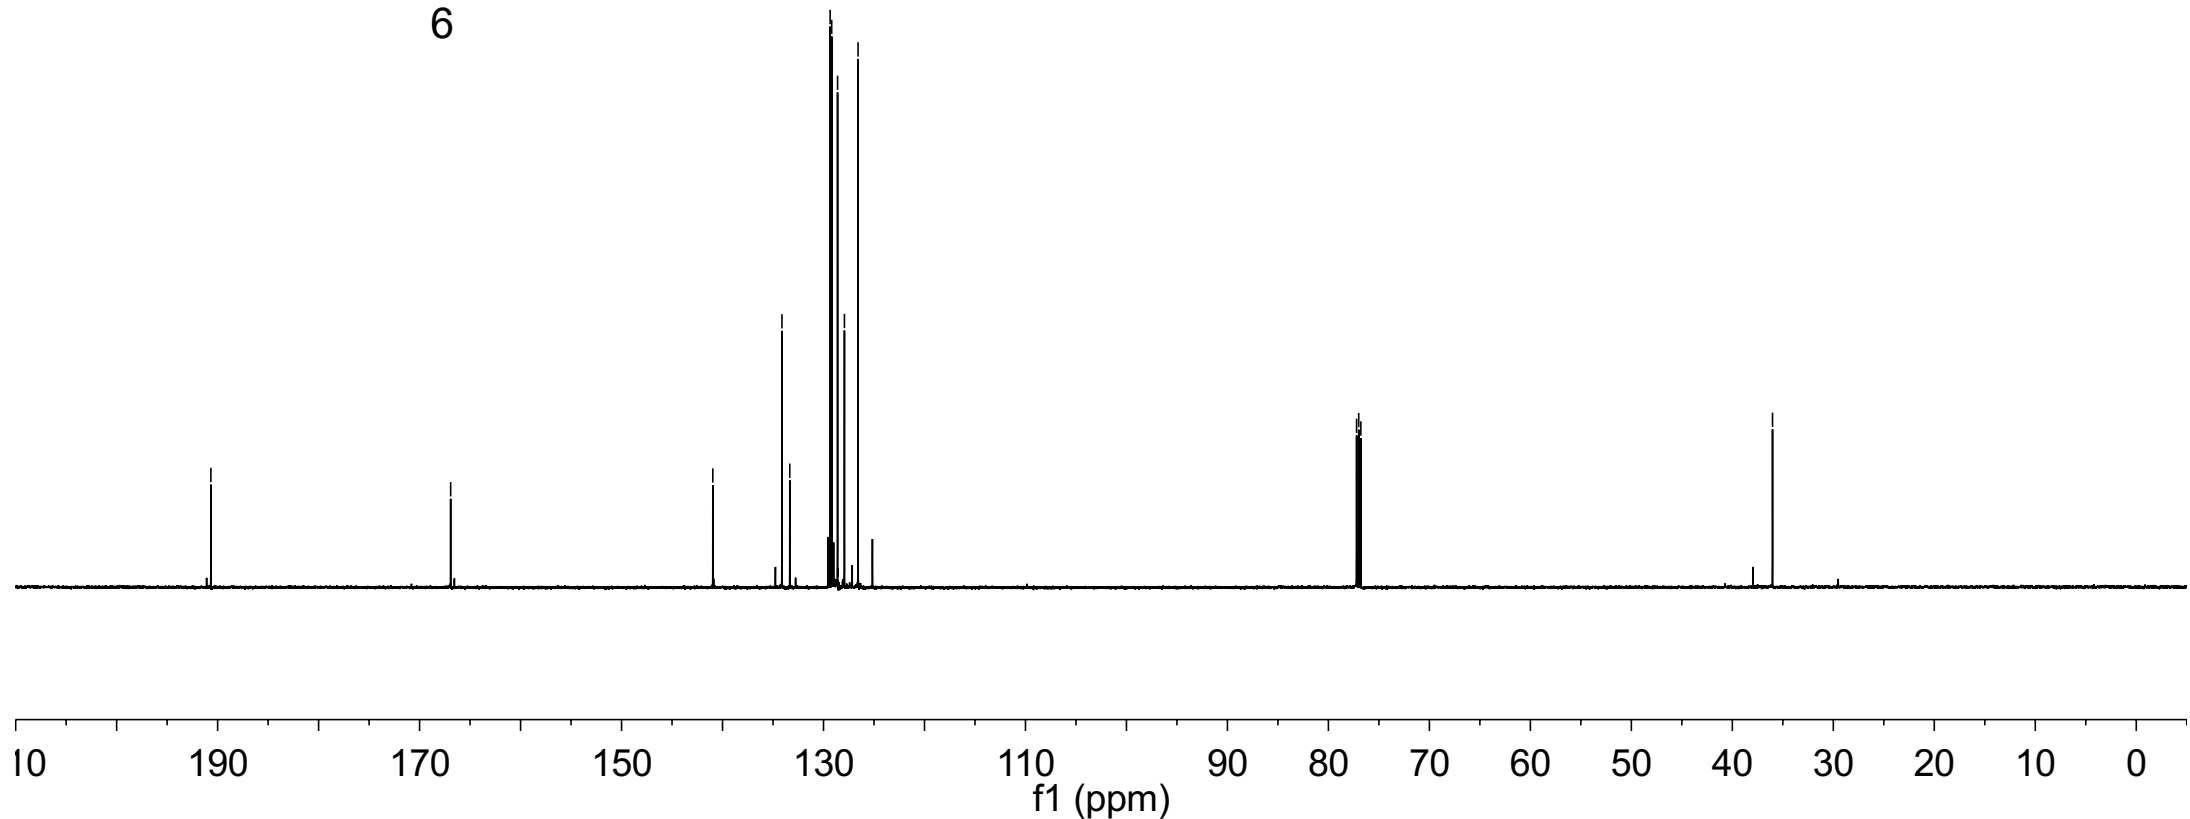

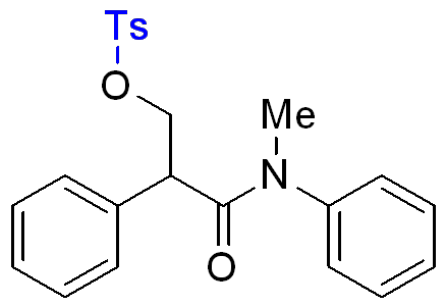

7

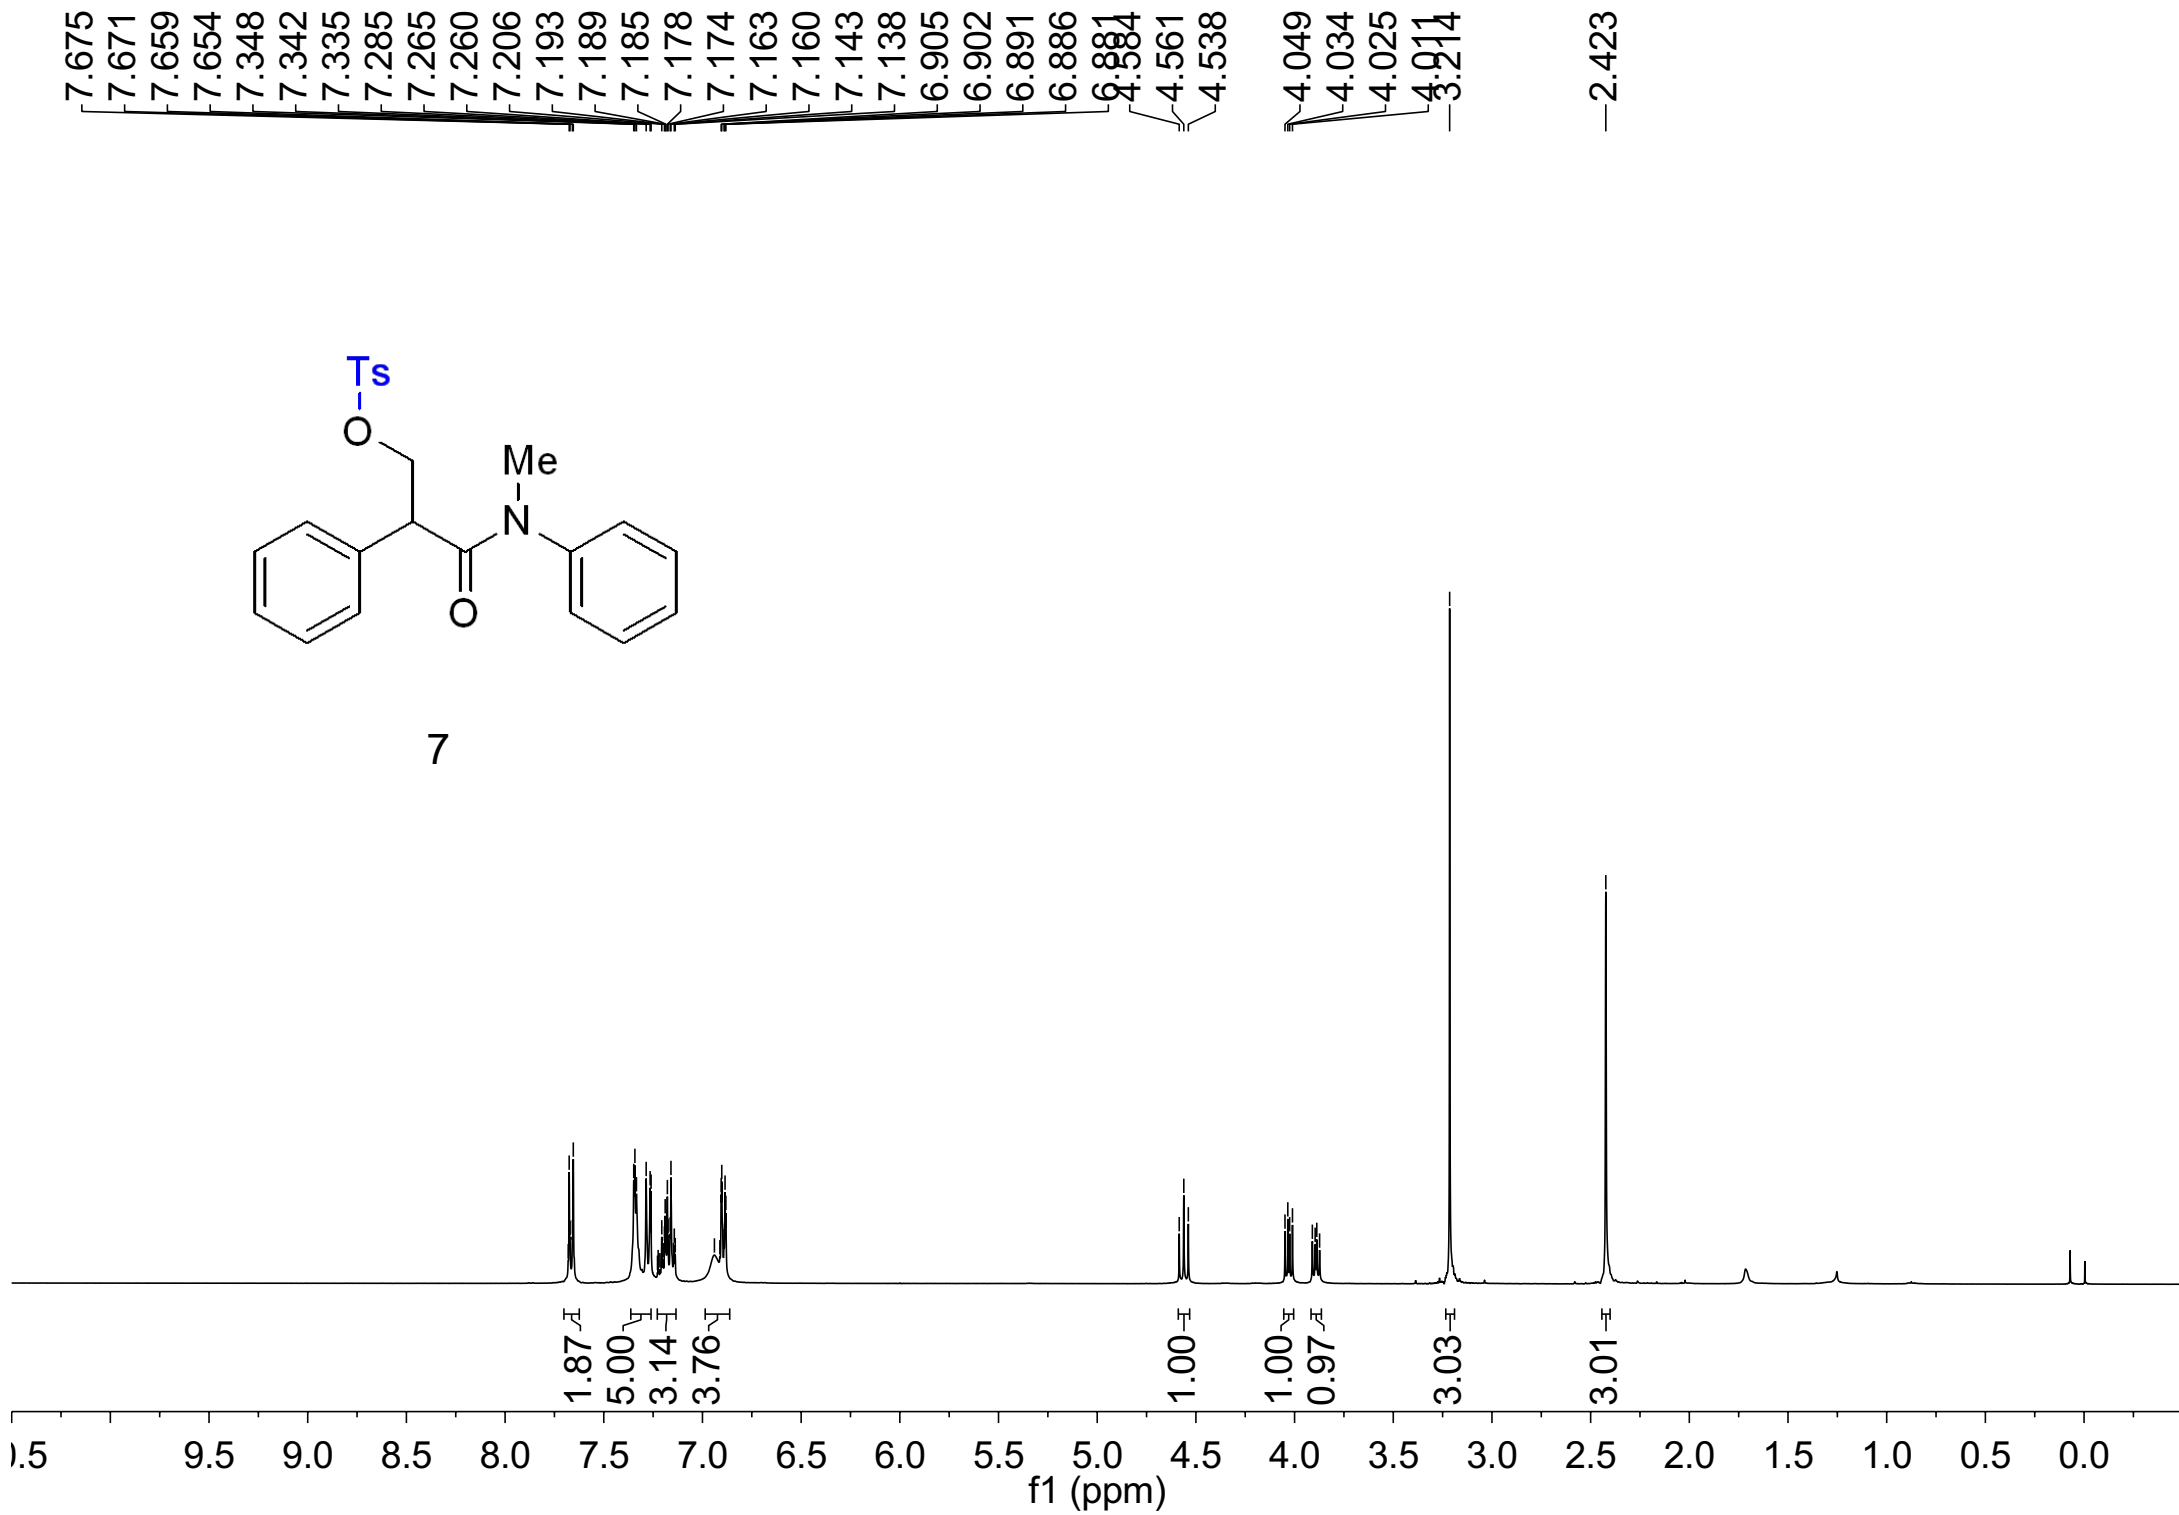

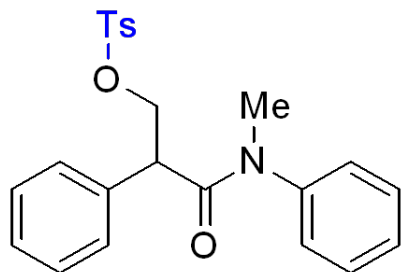

7

169.64  
144.60  
142.74  
134.73  
132.69  
129.72  
129.61  
128.60  
128.18  
128.15  
127.91  
127.86  
127.75

77.21  
77.00  
76.79  
71.65

48.52

37.61

21.60

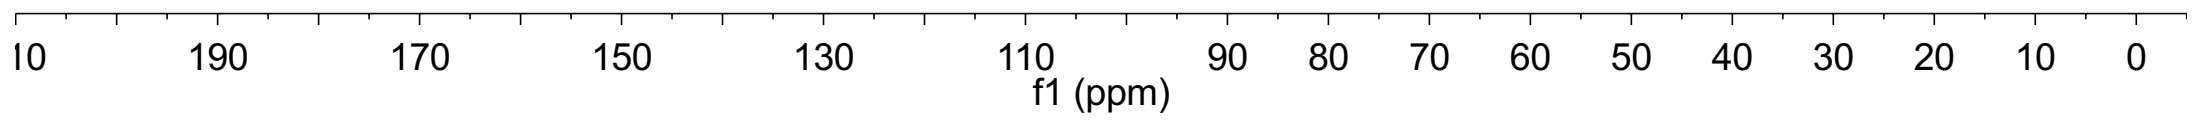

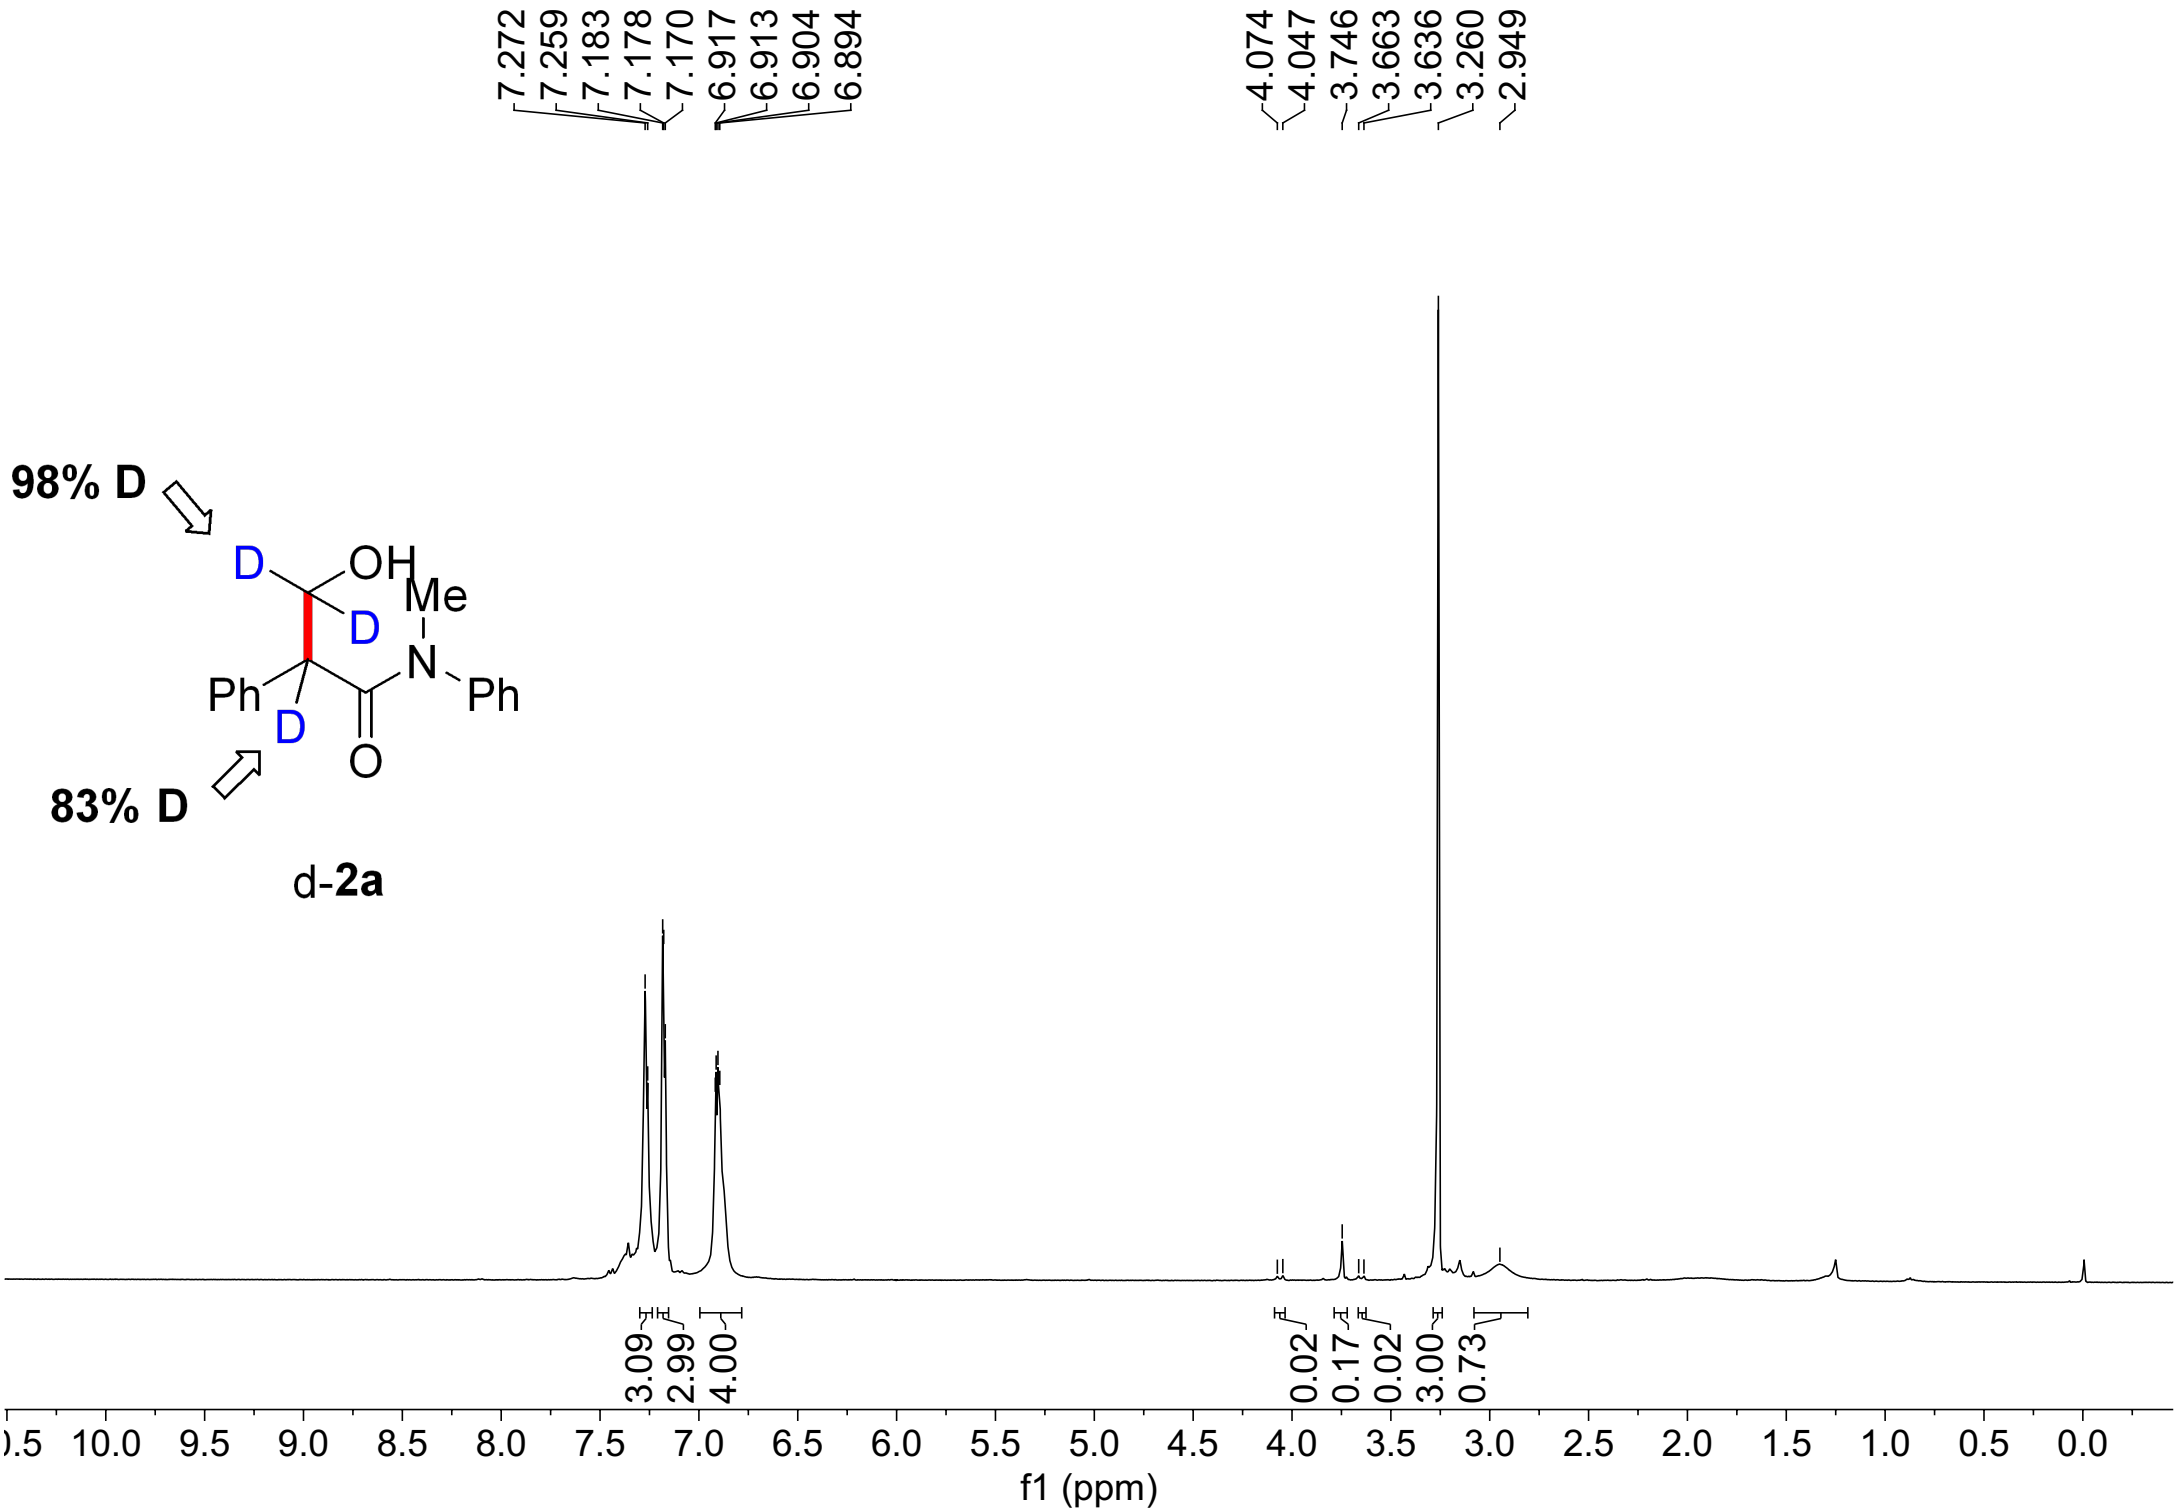

7.267  
7.177  
7.172  
7.163  
6.918  
6.906  
6.898

4.094  
4.072  
4.053  
3.773  
3.761  
3.751  
3.741  
3.651  
3.625  
3.253  
3.078

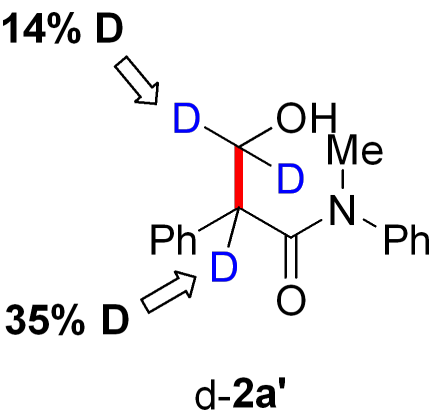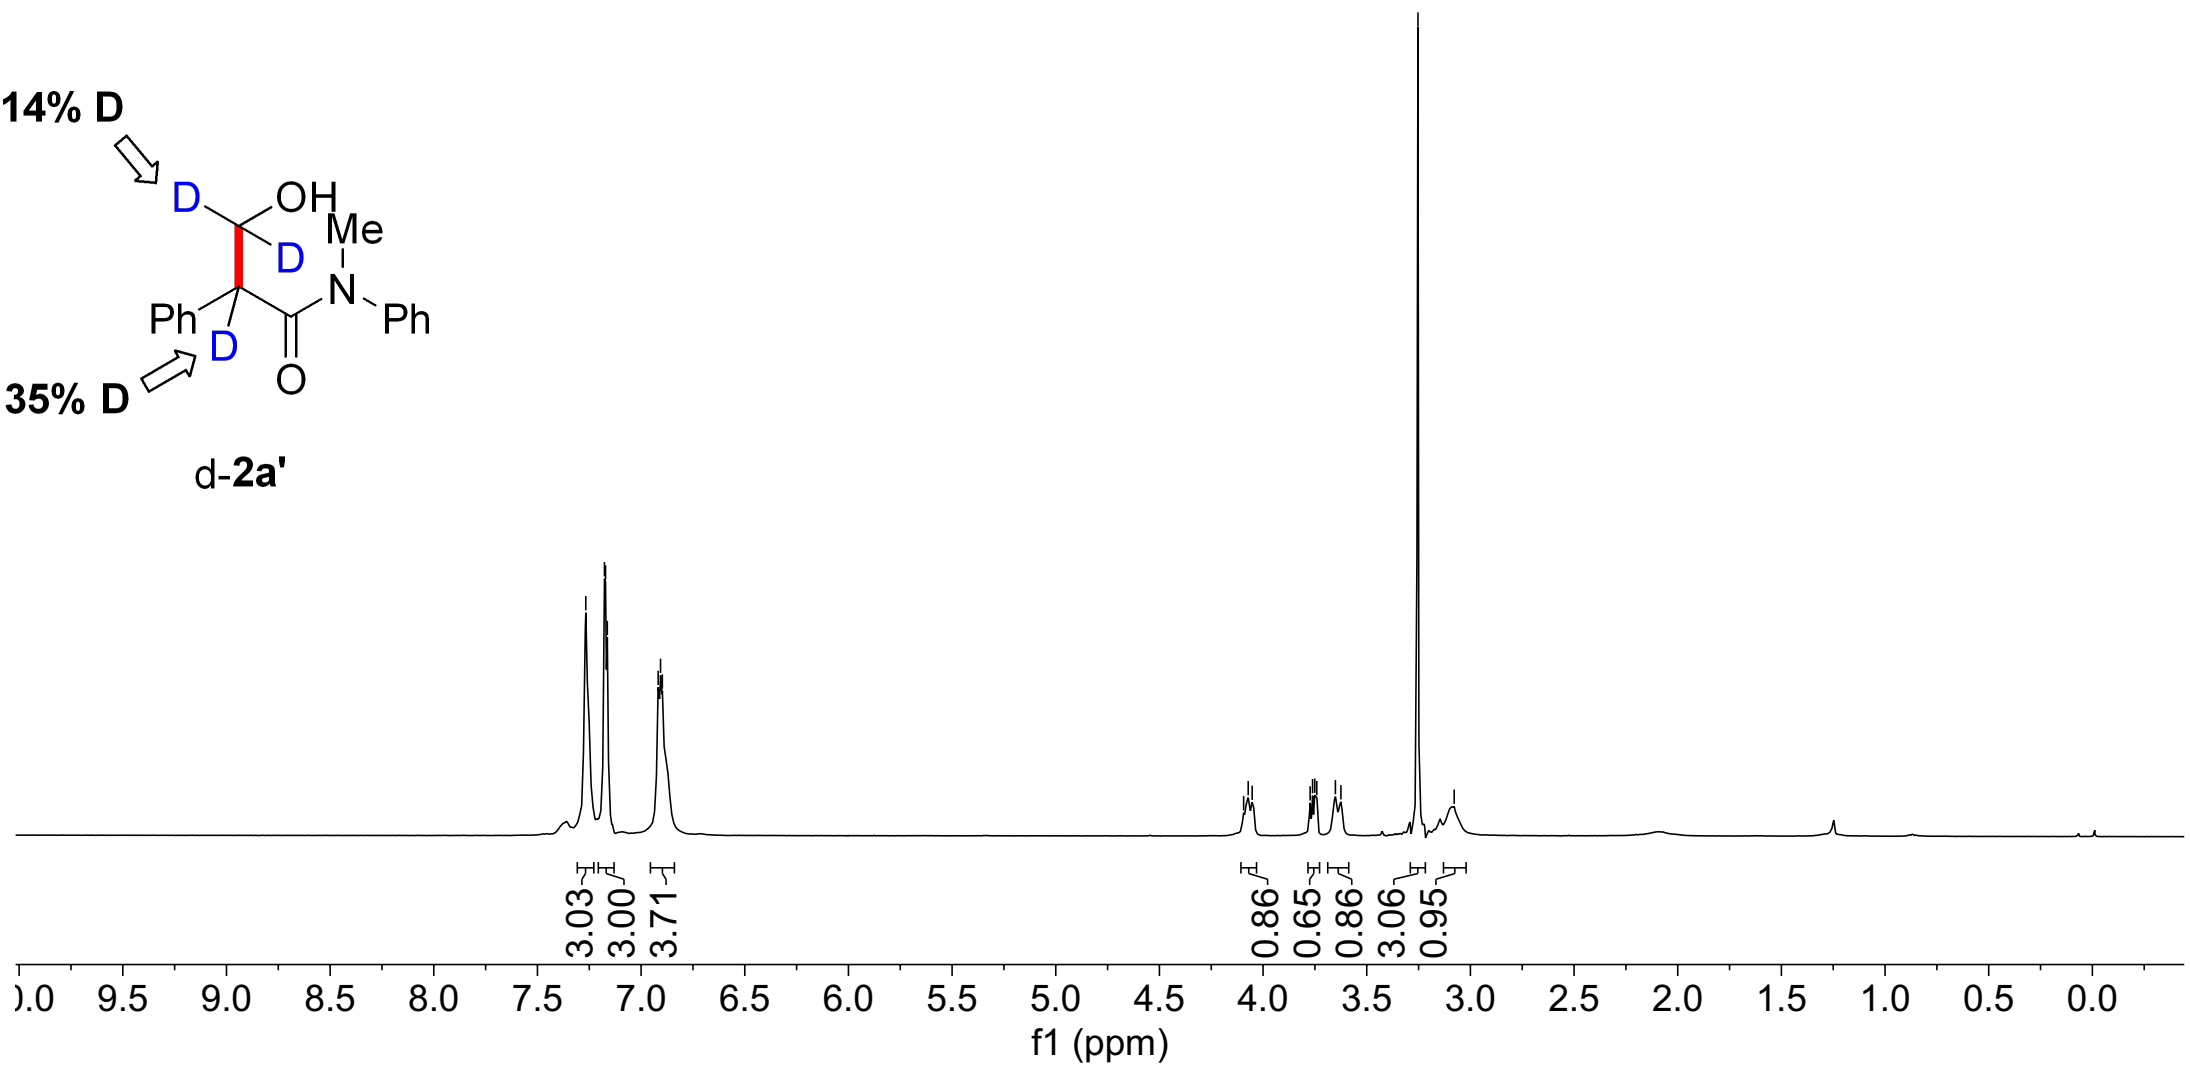

81% D

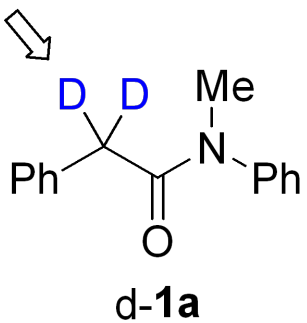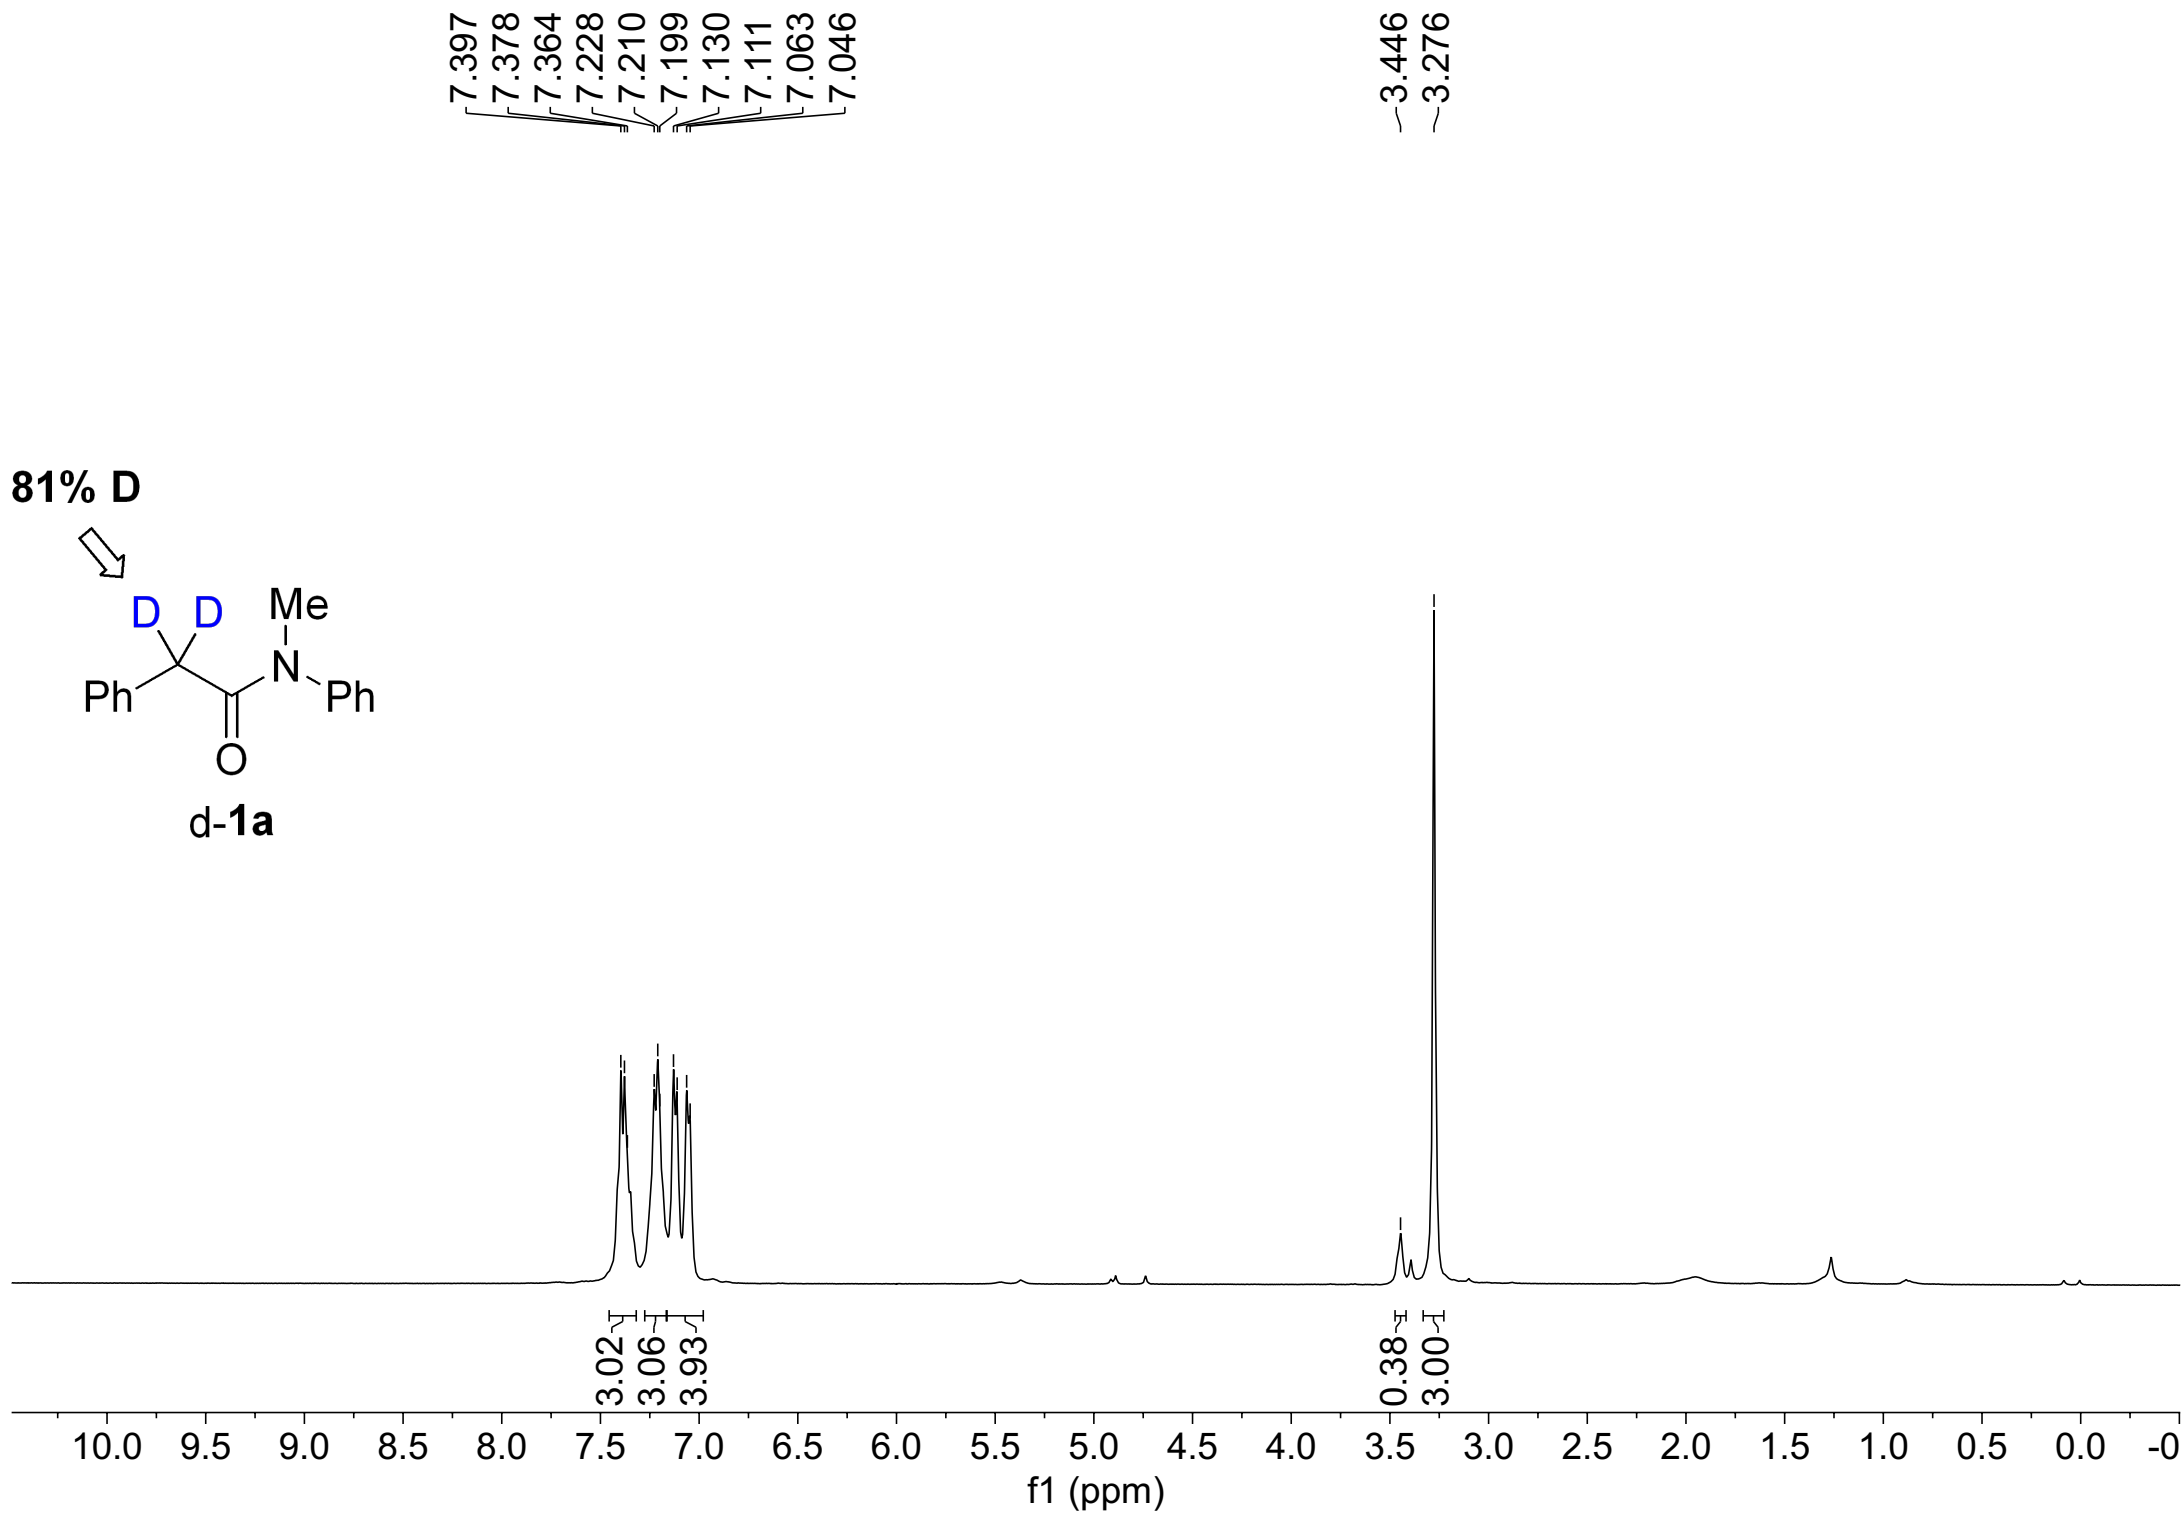

7.381  
7.364  
7.345  
7.331  
7.314  
7.297  
7.260  
7.222  
7.205  
7.187  
7.175  
7.157  
7.141  
7.102  
7.084  
7.058  
7.040

3.449  
3.251

35% D

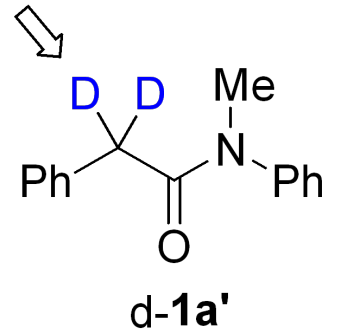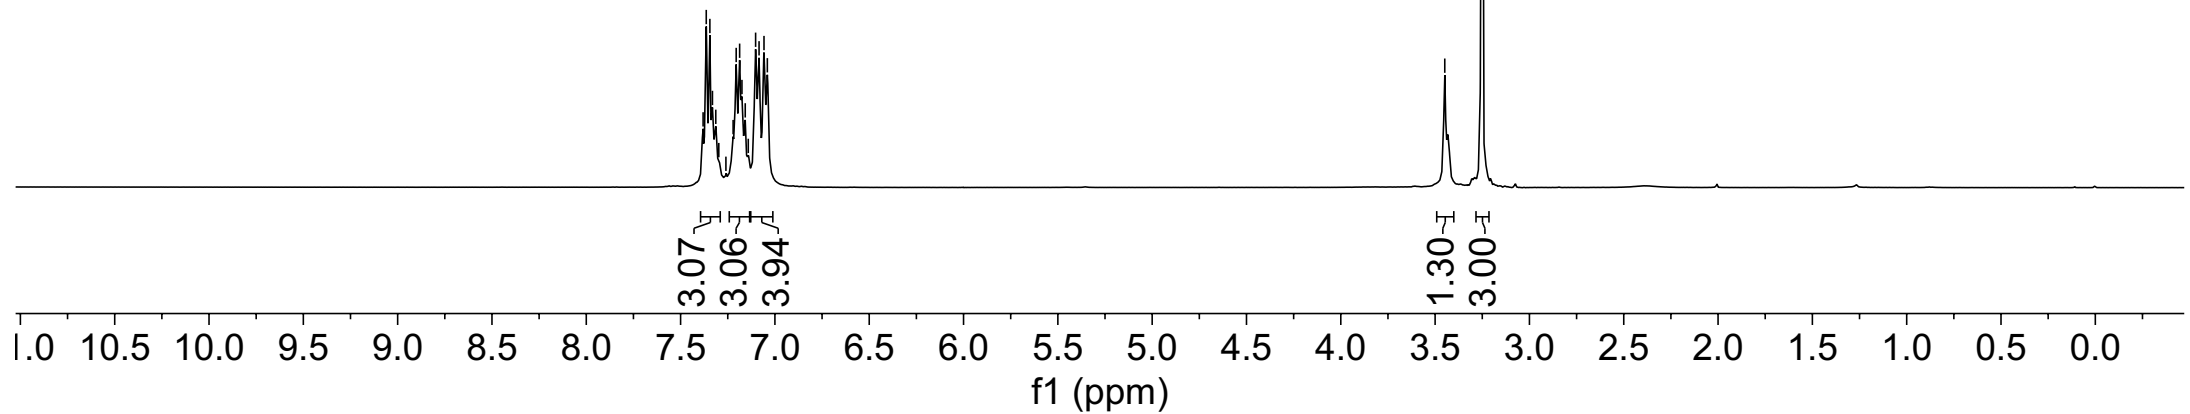

Supplement: d1cc06501g1.pdf [file d1cc06501g1.pdf]
